# Supplementary material for: “On-water” defluorophosphorylation of trifluoromethylated enones with phosphine oxides
Source: Royal Society of Chemistry journal article supplement (doi:10.1039/d3gc01565c), 2023-01-01

## Supporting Information

### “On-Water” Defluorophosphorylation of Trifluoromethylated Enones with Phosphine Oxides

Xue-Qiang Chu<sup>\*,a</sup> Li-Wen Sun,<sup>a</sup> Cheng Ma,<sup>d</sup> Jia-Wei Chen,<sup>a</sup> Yu-Lan Chen,<sup>a</sup> Shao-Fei Ni,<sup>\*,d</sup>  
Ming-Quan Zhu,<sup>a</sup> Jie Zhou,<sup>\*,b</sup> Mengtao Ma,<sup>c</sup> Zhi-Liang Shen<sup>\*,a</sup>

<sup>a</sup> Technical Institute of Fluorochemistry (TIF), Institute of Advanced Synthesis, School of Chemistry and Molecular Engineering, Nanjing Tech University, Nanjing 211816, China. E-mails: xueqiangchu@njtech.edu.cn; ias\_zlshen@njtech.edu.cn.

<sup>b</sup> State Key Laboratory of Materials-Oriented Chemical Engineering, College of Biotechnology and Pharmaceutical Engineering, Nanjing Tech University, Nanjing 211800, China. E-mail: jayzhou@njtech.edu.cn.

<sup>c</sup> Department of Chemistry and Materials Science, College of Science, Nanjing Forestry University, Nanjing 210037, China.

<sup>d</sup> Department of Chemistry, Key Laboratory for Preparation and Application of Ordered Structural Materials of Guangdong Province, Shantou University, Shantou, 515063 China. E-mail: sfni@stu.edu.cn.

### Table of Contents

|                                                                                                        |          |
|--------------------------------------------------------------------------------------------------------|----------|
| General information                                                                                    | Page S2  |
| General procedure for the synthesis of (Z)-4,4-difluoro-1-arylbuta-1,3-dien-1-yl phosphinates <b>3</b> | Page S2  |
| General procedure for the scaled-up synthesis of product <b>3aa</b>                                    | Page S2  |
| Further transformation of products <b>3aa</b>                                                          | Page S2  |
| Optimization of reaction conditions                                                                    | Page S4  |
| Mechanistic studies                                                                                    | Page S6  |
| The X-ray crystal structure of product <b>3aa</b> and <b>10</b>                                        | Page S10 |
| DFT calculation results                                                                                | Page S12 |
| Characterization data for products                                                                     | Page S31 |
| Reference                                                                                              | Page S49 |
| <sup>1</sup> H, <sup>19</sup> F, <sup>31</sup> P, and <sup>13</sup> C NMR spectra of products          | Page S51 |

## General information

Unless otherwise stated, all reagents were purchased from commercial suppliers and used without further purification. All reactions were carried out under N<sub>2</sub> atmosphere using undistilled solvent. Melting points were recorded on an electrothermal digital melting point apparatus. IR spectra were recorded on a FT-IR spectrophotometer using KBr optics. <sup>1</sup>H, <sup>19</sup>F, <sup>31</sup>P, and <sup>13</sup>C NMR spectra were recorded in CDCl<sub>3</sub> on Bruker Avance or Joel 400 MHz spectrometers. The chemical shifts ( $\delta$ ) are reported in ppm and coupling constants ( $J$ ) in Hz. High resolution mass spectra (HRMS) were obtained on a Waters Q-TOF Premier Spectrometer (ESI or EI Source). Column chromatography was generally performed on silica gel (300-400 mesh) and reactions were monitored by thin layer chromatography (TLC) using UV light to visualize the course of the reactions.

## General procedure for the synthesis of (Z)-4,4-difluoro-1-arylbuta-1,3-dien-1-yl phosphinates 3

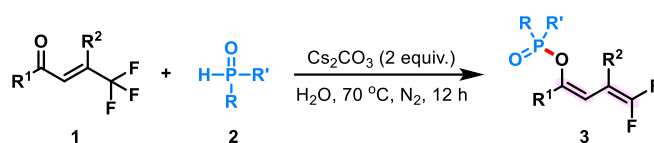

A solution of  $\beta$ -trifluoromethylated enone **1**<sup>[1]</sup> (0.3 mmol), phosphine oxide **2** (0.45 mmol), and Cs<sub>2</sub>CO<sub>3</sub> (195.5 mg, 0.6 mmol) in H<sub>2</sub>O (3.5 mL) was stirred at 70 °C (oil bath) under N<sub>2</sub> for 12 h. The reaction was then quenched by saturated NH<sub>4</sub>Cl solution (20 mL) and extracted with EtOAc (20 mL x 3). The organic layer was dried over MgSO<sub>4</sub>, and concentrated under reduced pressure. The crude product was purified by flash silica gel column chromatography (300-400 mesh) using petroleum ether/ethyl acetate (10/1~6/1) as eluent to afford the pure products **3**.

## General procedure for the scaled-up synthesis of product 3aa

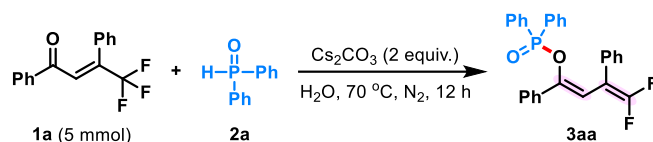

A solution of (*E*)-4,4,4-trifluoro-1-phenylbut-2-en-1-one **1a** (1.38 g, 5 mmol), diphenylphosphine oxide **2a** (1.52 g, 7.5 mmol), and Cs<sub>2</sub>CO<sub>3</sub> (3.26 g, 10 mmol) in H<sub>2</sub>O (60 mL) was stirred at 70 °C (oil bath) under N<sub>2</sub> for 12 h. The reaction was then quenched by saturated NH<sub>4</sub>Cl solution (60 mL) and extracted with EtOAc (60 mL x 3). The organic layer was dried over MgSO<sub>4</sub>, and concentrated under reduced pressure. The crude product was purified by flash silica gel column chromatography (300-400 mesh) using petroleum ether/ethyl acetate (10/1~6/1) as eluent to afford the pure product **3a** (1.46 g, 64% yield).

## Further transformation of product 3aa

### a) Dephosphorylation of product 3aa

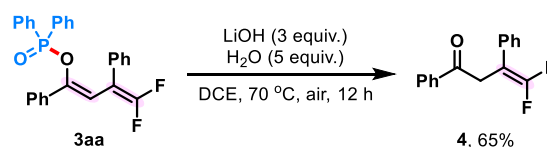

A solution of (*Z*)-4,4-difluoro-1,3-diphenylbuta-1,3-dien-1-yl diphenylphosphinate **3aa** (137.5 mg,

0.3 mmol), LiOH (21.6 mg, 0.9 mmol), and H<sub>2</sub>O (27.0 mg, 1.5 mmol) in DCE (2 mL) was stirred at 70 °C (oil bath) under air for 12 h. The reaction was then quenched by saturated NH<sub>4</sub>Cl solution (20 mL) and extracted with EtOAc (20 mL x 3). The organic layer was dried over MgSO<sub>4</sub>, and concentrated under reduced pressure. The crude product was purified by flash silica gel column chromatography (300-400 mesh) using petroleum ether/ethyl acetate (100/1) as eluent to afford the pure product **4** (50.7 mg, 65% yield).

#### b) Phosphorylation of product **3aa**

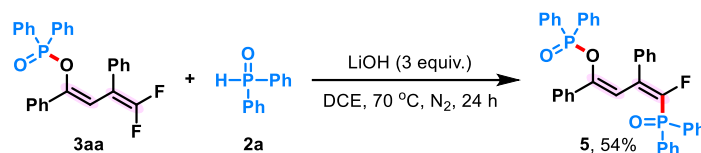

A solution of (*Z*)-4,4-difluoro-1,3-diphenylbuta-1,3-dien-1-yl diphenylphosphinate **3aa** (137.5 mg, 0.3 mmol), diphenylphosphine oxide **2a** (151.6 mg, 0.75 mmol), and LiOH (21.6 mg, 0.9 mmol) in DCE (2 mL) was stirred at 70 °C (oil bath) under N<sub>2</sub> for 24 h. The reaction was then quenched by saturated NH<sub>4</sub>Cl solution (20 mL) and extracted with EtOAc (20 mL x 3). The organic layer was dried over MgSO<sub>4</sub>, and concentrated under reduced pressure. The crude product was purified by flash silica gel column chromatography (300-400 mesh) using petroleum ether/ethyl acetate (4/1~1/1) as eluent to afford the pure product **5** (104.6 mg, 54% yield).

#### c) Synthesis of product **6**

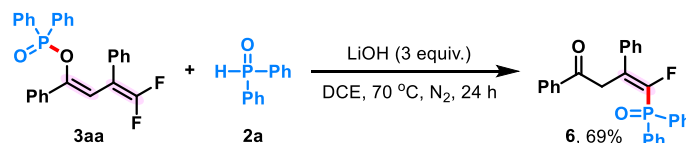

A solution of (*Z*)-4,4-difluoro-1,3-diphenylbuta-1,3-dien-1-yl diphenylphosphinate **3aa** (137.5 mg, 0.3 mmol), diphenylphosphine oxide **2a** (75.8 mg, 0.375 mmol), and LiOH (21.6 mg, 0.9 mmol) in DCE (2 mL) was stirred at 70 °C (oil bath) under N<sub>2</sub> for 24 h. The reaction was then quenched by saturated NH<sub>4</sub>Cl solution (20 mL) and extracted with EtOAc (20 mL x 3). The organic layer was dried over MgSO<sub>4</sub>, and concentrated under reduced pressure. The crude product was purified by flash silica gel column chromatography (300-400 mesh) using petroleum ether/ethyl acetate (10/1~6/1) as eluent to afford the pure product **6** (91.8 mg, 69% yield).

#### d) Synthesis of product **7**

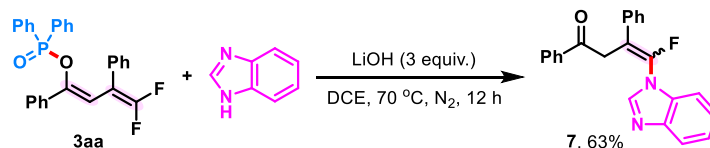

A solution of (*Z*)-4,4-difluoro-1,3-diphenylbuta-1,3-dien-1-yl diphenylphosphinate **3aa** (137.5 mg, 0.3 mmol), 1*H*-benzo[*d*]imidazole (88.6 mg, 0.75 mmol), and LiOH (21.6 mg, 0.9 mmol) in DCE (2 mL) was stirred at 70 °C (oil bath) under N<sub>2</sub> for 12 h. The reaction was then quenched by saturated NH<sub>4</sub>Cl solution (20 mL) and extracted with EtOAc (20 mL x 3). The organic layer was dried over MgSO<sub>4</sub>, and concentrated under reduced pressure. The crude product was purified by flash silica gel column chromatography (300-400 mesh) using petroleum ether/ethyl acetate

(10/1~6/1) as eluent to afford the pure product **7** (67.4 mg, 63% yield, *Z/E* = 4/3).

### e) Synthesis of product **8**

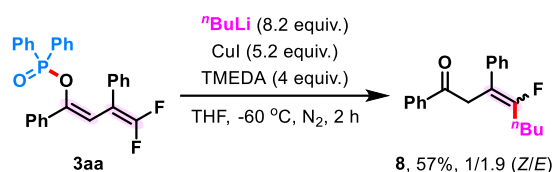

A solution of (*Z*)-4,4-difluoro-1,3-diphenylbuta-1,3-dien-1-yl diphenylphosphinate **3aa** (137.5 mg, 0.3 mmol), <sup>n</sup>BuLi (2.5 M in hexane, 1 mL, 2.5 mmol), CuI (297.1 mg, 1.56 mmol), and TMEDA (139.4 mg, 1.2 mmol) in THF (5 mL) was stirred at -60 °C under N<sub>2</sub> for 2 h. The reaction was then quenched by saturated NH<sub>4</sub>Cl solution (20 mL) and extracted with EtOAc (20 mL x 3). The organic layer was dried over MgSO<sub>4</sub>, and concentrated under reduced pressure. The crude product was purified by flash silica gel column chromatography (300-400 mesh) using petroleum ether/ethyl acetate (100/1) as eluent to afford the pure product **8** (48.8 mg, 55% yield, *Z/E* = 1/1.9).

### f) Synthesis of product **10**

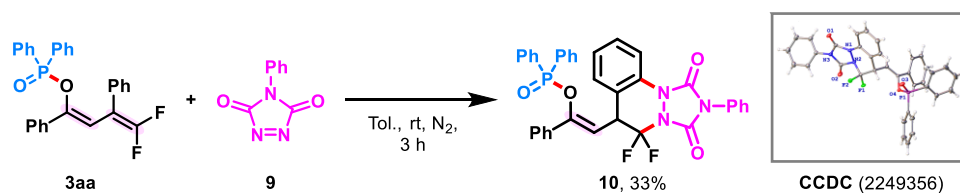

A solution of (*Z*)-4,4-difluoro-1,3-diphenylbuta-1,3-dien-1-yl diphenylphosphinate **3aa** (45.8 mg, 0.1 mmol) and **9** (26.3 mg, 0.15 mmol) in toluene (2 mL) was stirred at room temperature under N<sub>2</sub> for 3 h. The reaction was then quenched by saturated NH<sub>4</sub>Cl solution (20 mL) and extracted with EtOAc (20 mL x 3). The organic layer was dried over MgSO<sub>4</sub>, and concentrated under reduced pressure. The crude product was purified by flash silica gel column chromatography (300-400 mesh) using petroleum ether/ethyl acetate (6/1~4/1) as eluent to afford the pure product **10** (20.7 mg, 33% yield).

## Optimization of reaction conditions

**Table S1.** Optimization of reaction conditions in water<sup>a</sup>

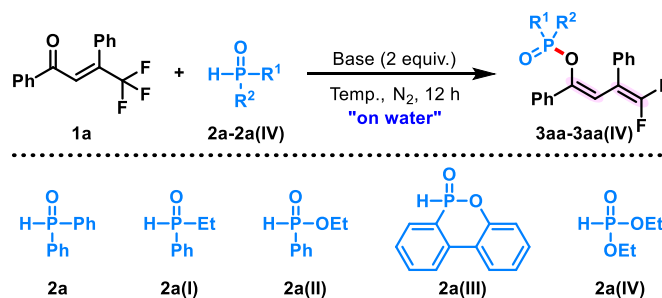

| Entry | <b>2</b> (x equiv) | Base                            | Temp. (°C) | Yield of <b>3aa-3aa(IV)</b> (%) <sup>b</sup> |
|-------|--------------------|---------------------------------|------------|----------------------------------------------|
| 1     | <b>2a</b> (2.5)    | CS <sub>2</sub> CO <sub>3</sub> | 70         | 56 (52) <sup>c</sup>                         |



|           |                      |                                     |           |                            |
|-----------|----------------------|-------------------------------------|-----------|----------------------------|
| 2         | <b>2a(I)</b> (2.5)   | Cs <sub>2</sub> CO <sub>3</sub>     | 70        | 0                          |
| 3         | <b>2a(II)</b> (2.5)  | Cs <sub>2</sub> CO <sub>3</sub>     | 70        | 0                          |
| 4         | <b>2a(III)</b> (2.5) | Cs <sub>2</sub> CO <sub>3</sub>     | 70        | 0                          |
| 5         | <b>2a(IV)</b> (2.5)  | Cs <sub>2</sub> CO <sub>3</sub>     | 70        | 0                          |
| 6         | <b>2a</b> (2.5)      | K <sub>3</sub> PO <sub>4</sub>      | 70        | 55                         |
| 7         | <b>2a</b> (2.5)      | LiOH                                | 70        | 7                          |
| 8         | <b>2a</b> (2.5)      | NaOAc                               | 70        | 30                         |
| 9         | <b>2a</b> (2.5)      | Et <sub>3</sub> N                   | 70        | 40                         |
| 10        | <b>2a</b> (2.5)      | NaOH                                | 70        | 29                         |
| 11        | <b>2a</b> (2.5)      | Cs <sub>2</sub> CO <sub>3</sub>     | 40        | 16 (trace) <sup>d</sup>    |
| 12        | <b>2a</b> (2.5)      | Cs <sub>2</sub> CO <sub>3</sub>     | 100       | 25 (10) <sup>d</sup>       |
| 13        | <b>2a</b> (2.0)      | Cs <sub>2</sub> CO <sub>3</sub>     | 70        | 61                         |
| <b>14</b> | <b>2a (1.5)</b>      | <b>Cs<sub>2</sub>CO<sub>3</sub></b> | <b>70</b> | <b>63 (62)<sup>c</sup></b> |
| 15        | <b>2a</b> (1.0)      | Cs <sub>2</sub> CO <sub>3</sub>     | 70        | 53                         |
| 16        | <b>2a</b> (1.5)      | Cs <sub>2</sub> CO <sub>3</sub>     | 70        | 61 <sup>e</sup>            |
| 17        | <b>2a</b> (1.5)      | Cs <sub>2</sub> CO <sub>3</sub>     | 70        | 61 <sup>f</sup>            |
| 18        | <b>2a</b> (1.5)      | Cs <sub>2</sub> CO <sub>3</sub>     | 70        | 61 <sup>g</sup>            |
| 19        | <b>2a</b> (1.5)      | Cs <sub>2</sub> CO <sub>3</sub>     | 70        | 61 <sup>h</sup>            |

<sup>a</sup> Reaction conditions: **1a** (0.3 mmol), **2** (0.3-0.75 mmol), and base (0.6 mmol) in H<sub>2</sub>O (3.5 mL) at 40-100 °C (oil bath) under N<sub>2</sub> for 12 h. <sup>b</sup> Yields were determined by <sup>19</sup>F NMR analysis with 4-chlorobenzotrifluoride (0.1 mmol) as an internal standard. <sup>c</sup> Isolated yield. <sup>d</sup> Yield of byproduct 4,4-difluoro-1,3-diphenylbut-3-en-1-one. <sup>e</sup> In water (2 mL). <sup>f</sup> In water (1 mL). <sup>g</sup> For 24 h. <sup>h</sup> Cs<sub>2</sub>CO<sub>3</sub> (2.5 equiv) was used.

**Table S2.** Optimization of reaction solvents in the presence of Cs<sub>2</sub>CO<sub>3</sub><sup>a</sup>

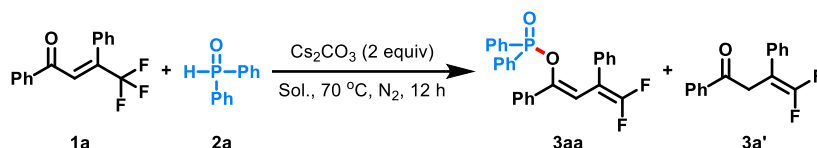

| Entry | Solvent (x mL) | Yield of <b>3aa</b> (%) <sup>b</sup> | Yield of <b>3a'</b> (%) <sup>b</sup> |
|-------|----------------|--------------------------------------|--------------------------------------|
| 1     | MeCN (1)       | 0                                    | 53                                   |
| 2     | MeCN (3.5)     | 0                                    | 57                                   |
| 3     | MeCN (6)       | 0                                    | 50                                   |
| 4     | EtOH (3.5)     | 0                                    | 3                                    |
| 5     | DMSO (1)       | 0                                    | 0                                    |
| 6     | DMSO (3.5)     | 0                                    | 0                                    |
| 7     | DMSO (6)       | 0                                    | 0                                    |
| 8     | DMF (3.5)      | 0                                    | 7                                    |
| 9     | THF (1)        | 0                                    | 60                                   |
| 10    | THF (3.5)      | 0                                    | 82                                   |
| 11    | THF (6)        | 0                                    | 83                                   |
| 12    | EtOAc (3.5)    | 0                                    | 72                                   |
| 13    | Toluene (1)    | 0                                    | 76                                   |
| 14    | Toluene (3.5)  | 11                                   | 64                                   |

|    |             |   |    |
|----|-------------|---|----|
| 15 | Toluene (6) | 3 | 78 |
| 16 | NMP (3.5)   | 0 | 11 |
| 17 | DMA (3.5)   | 0 | 17 |

<sup>a</sup> Reaction conditions: **1a** (0.3 mmol), **2a** (0.45 mmol), and Cs<sub>2</sub>CO<sub>3</sub> (0.6 mmol) in solvent (1-6 mL) at 70 °C under N<sub>2</sub> for 12 h. <sup>b</sup> Yields were determined by <sup>19</sup>F NMR analysis with 4-chlorobenzotrifluoride (0.1 mmol) as an internal standard.

### Mechanistic studies

#### a) The influence of substituent (R) on the reaction of trifluoromethylated enone

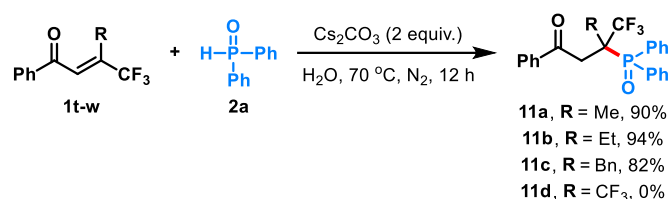

A solution of trifluoromethylated enone **1t-w** (0.3 mmol), diphenylphosphine oxide **2a** (91.0 mg, 0.45 mmol), and Cs<sub>2</sub>CO<sub>3</sub> (195.5 mg, 0.6 mmol) in H<sub>2</sub>O (3.5 mL) was stirred at 70 °C (oil bath) under N<sub>2</sub> for 12 h. The reaction was then quenched by saturated NH<sub>4</sub>Cl solution (20 mL) and extracted with EtOAc (20 mL x 3). The organic layer was dried over MgSO<sub>4</sub>, and concentrated under reduced pressure. The crude product was purified by flash silica gel column chromatography (300-400 mesh) using petroleum ether/ethyl acetate (10/1~5/1) as eluent to afford the pure products **11a-d** (0-94% yields).

*This result suggested that the substituent adjacent to the trifluoromethyl group has a dramatic influence on the reaction selectivity.*

#### b) The reaction of 2,2,2-trifluoro-1-phenylethan-1-one (**1x**) with **2a**

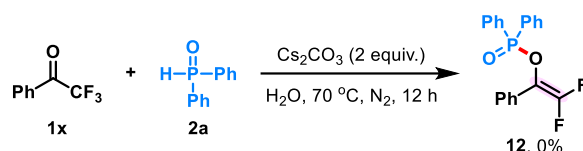

A solution of 2,2,2-trifluoro-1-phenylethan-1-one **1x** (52.2 mg, 0.3 mmol), diphenylphosphine oxide **2a** (91.0 mg, 0.45 mmol), and Cs<sub>2</sub>CO<sub>3</sub> (195.5 mg, 0.6 mmol) in H<sub>2</sub>O (3.5 mL) was stirred at 70 °C (oil bath) under N<sub>2</sub> for 12 h. The reaction was then quenched by saturated NH<sub>4</sub>Cl solution (20 mL) and extracted with EtOAc (20 mL x 3). The organic layer was dried over MgSO<sub>4</sub>, and concentrated under reduced pressure. No desired product **12** was observed.

*This result suggested that the alkenyl moiety in the trifluoromethylated enone was important for the success of the present defluorophosphorylation.*

#### c) The reaction of **1a'** with **2a'** under standard conditions

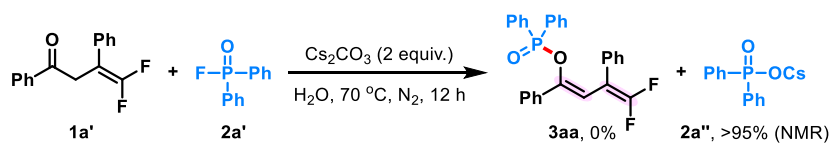

A solution of 4,4-difluoro-1,3-diphenylbut-3-en-1-one (77.5 mg, 0.3 mmol, **1a'**), diphenylphosphinic fluoride (79.3 mg, 0.36 mmol, **2a'**), and Cs<sub>2</sub>CO<sub>3</sub> (195.5 mg, 0.6 mmol) in H<sub>2</sub>O (3.5 mL) was stirred at 70 °C (oil bath) under N<sub>2</sub> for 12 h. No desired product **3aa** was detected.

The residue was then directly analyzed by NMR. 95% NMR yield of cesium diphenylphosphinate **2a''** was determined by <sup>31</sup>P NMR analysis of residue using triphenylphosphine oxide as an internal standard.

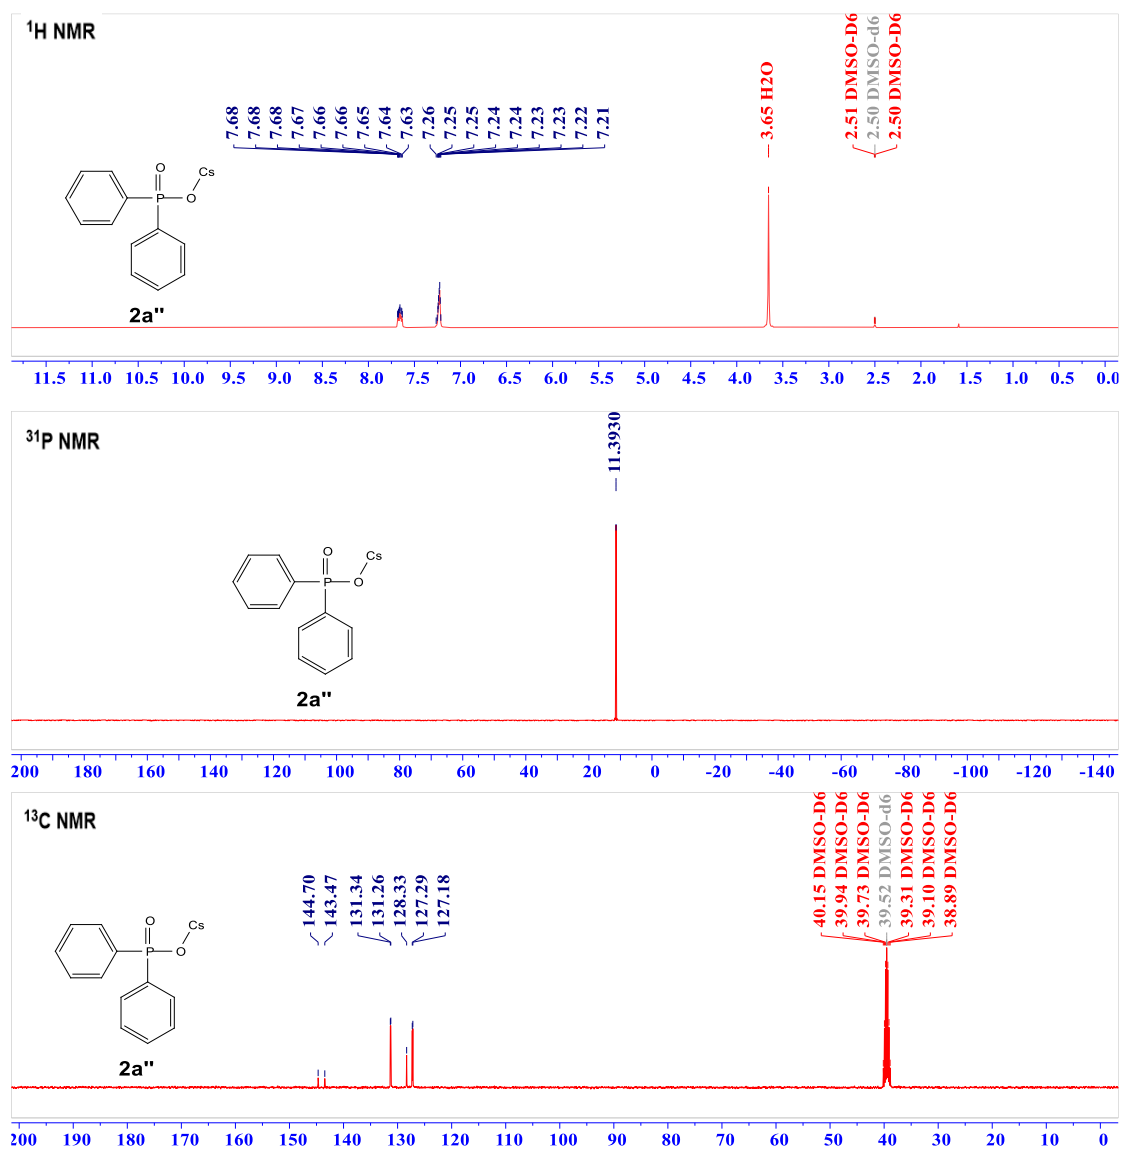

#### d) The reactivity of Z-trifluoromethylated enone (**Z**)-**1a**

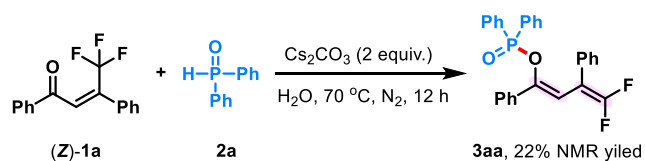

A solution of (**Z**)-4,4,4-trifluoro-1,3-diphenylbut-2-en-1-one (**Z**)-**1a** (82.9 mg, 0.3 mmol), diphenylphosphine oxide **2a** (91.0 mg, 0.45 mmol), and Cs<sub>2</sub>CO<sub>3</sub> (195.5 mg, 0.6 mmol) in H<sub>2</sub>O

(3.5 mL) was stirred at 70 °C (oil bath) under N<sub>2</sub> for 12 h. The reaction was then quenched by saturated NH<sub>4</sub>Cl solution (20 mL) and extracted with EtOAc (20 mL x 3). The organic layer was dried over MgSO<sub>4</sub>, and concentrated under reduced pressure. The yield of product **3aa** was determined by <sup>19</sup>F NMR analysis with 4-chlorobenzotrifluoride (0.1 mmol) as an internal standard. This result suggested that the configuration of the trifluoromethylated enone has a critical effect on the reaction performance. Low yield is presumably attributed to the competitive relationship between carbonyl group and trifluoromethyl group in the Z-trifluoromethylated enone for the formation of hydrogen bond with water.

### e) The heterogeneity of the reaction

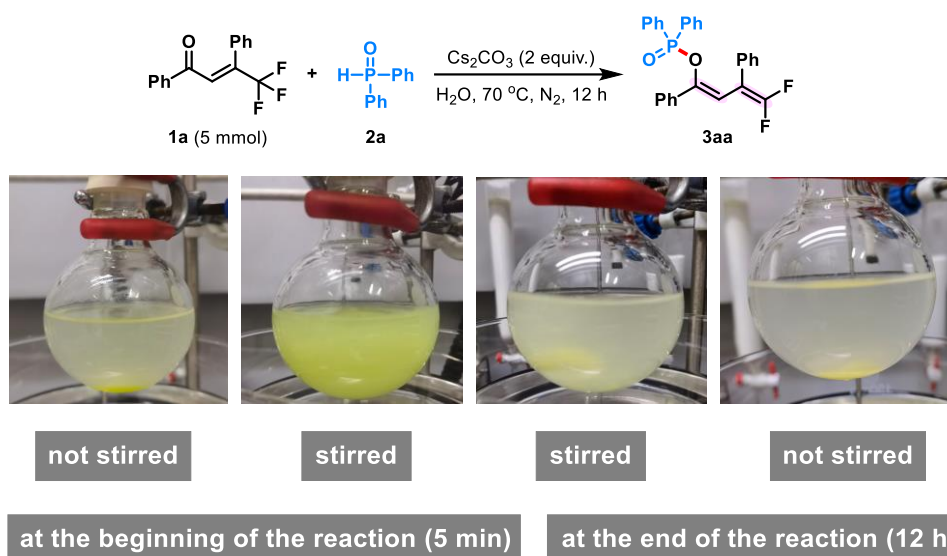

The heterogeneity of the reaction was observed during the scaled-up synthesis of product **3aa**.

### f) The influence of different additives on the reaction

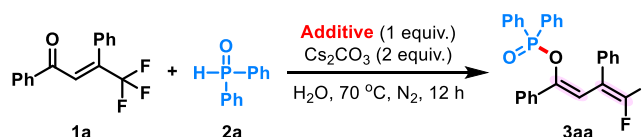

| Entry | Additive                                   | 3aa (%) |
|-------|--------------------------------------------|---------|
| 1     | <i>n</i> Bu <sub>4</sub> NBr               | 4       |
| 2     | <i>n</i> Bu <sub>4</sub> NHSO <sub>4</sub> | 8       |
| 3     | 18-crown-6                                 | 49      |
| 4     | BF <sub>3</sub> ·Et <sub>2</sub> O         | 29      |
| 5     | HFIP                                       | 13      |
| 6     | <i>N</i> -methylacetamide                  | 32      |

A solution of (*E*)-4,4,4-trifluoro-1-phenylbut-2-en-1-one **1a** (82.9 mg, 0.3 mmol), diphenylphosphine oxide **2a** (91.0 mg, 0.45 mmol), additive (0.3 mmol), and Cs<sub>2</sub>CO<sub>3</sub> (195.5 mg, 0.6 mmol) in H<sub>2</sub>O (3.5 mL) was stirred at 70 °C (oil bath) under N<sub>2</sub> for 12 h. The reaction was then quenched by saturated NH<sub>4</sub>Cl solution (20 mL) and extracted with EtOAc (20 mL x 3). The organic layer was dried over MgSO<sub>4</sub>, and concentrated under reduced pressure. The yields of product **3aa** were determined by <sup>19</sup>F NMR analysis with 4-chlorobenzotrifluoride (0.1 mmol) as an internal standard.

These results suggested that the unique properties at the macroscopic phase boundary between water and insoluble reactants, such as hydrophobic effect and hydrogen-bonding interaction, were involved in the formation of **3aa**.

### g) The influence of TBAB on the reaction

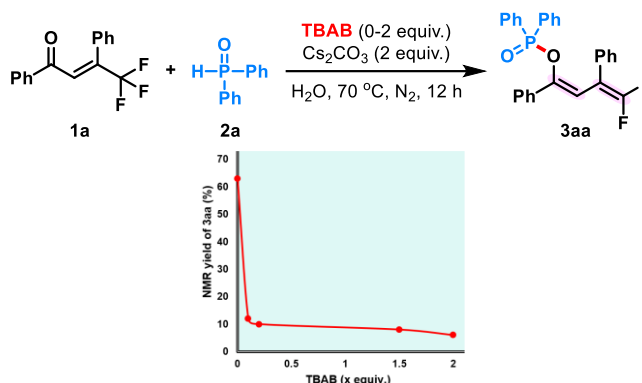

A solution of (*E*)-4,4,4-trifluoro-1-phenylbut-2-en-1-one **1a** (82.9 mg, 0.3 mmol), diphenylphosphine oxide **2a** (91.0 mg, 0.45 mmol), TBAB (0-0.6 mmol), and Cs<sub>2</sub>CO<sub>3</sub> (195.5 mg, 0.6 mmol) in H<sub>2</sub>O (3.5 mL) was stirred at 70 °C (oil bath) under N<sub>2</sub> for 12 h. The reaction was then quenched by saturated NH<sub>4</sub>Cl solution (20 mL) and extracted with EtOAc (20 mL x 3). The organic layer was dried over MgSO<sub>4</sub>, and concentrated under reduced pressure. The yields of product **3aa** were determined by <sup>19</sup>F NMR analysis with 4-chlorobenzotrifluoride (0.1 mmol) as an internal standard.

These results suggested that hydrogen-bonding interaction at the macroscopic phase boundary between water and insoluble reactants accelerated the reaction.

### h) The isotropic effect of additives on the reaction

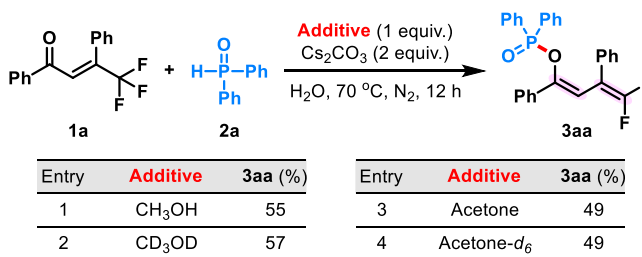

A solution of (*E*)-4,4,4-trifluoro-1-phenylbut-2-en-1-one **1a** (82.9 mg, 0.3 mmol), diphenylphosphine oxide **2a** (91.0 mg, 0.45 mmol), additive (0.3 mmol), and Cs<sub>2</sub>CO<sub>3</sub> (195.5 mg, 0.6 mmol) in H<sub>2</sub>O (3.5 mL) was stirred at 70 °C (oil bath) under N<sub>2</sub> for 12 h. The reaction was then quenched by saturated NH<sub>4</sub>Cl solution (20 mL) and extracted with EtOAc (20 mL x 3). The organic layer was dried over MgSO<sub>4</sub>, and concentrated under reduced pressure. The yield of product **3aa** was determined by <sup>19</sup>F NMR analysis with 4-chlorobenzotrifluoride (0.1 mmol) as an internal standard.

Finally, no obvious isotropic effect was observed when CH<sub>3</sub>OH/CD<sub>3</sub>OD and acetone/acetone-*d*<sub>6</sub> with different H<sup>+</sup> ion conjugation abilities were used as additives.

## The X-ray crystal structure of products 3aa and 10

The single crystals were grown from the mixed solution of DCM and EtOAc (v/v = 1:3) by slowly evaporating the above solvents at room temperature.

### (Z)-4,4-Difluoro-1-phenylbuta-1,3-dien-1-yl diphenylphosphinate (3aa):

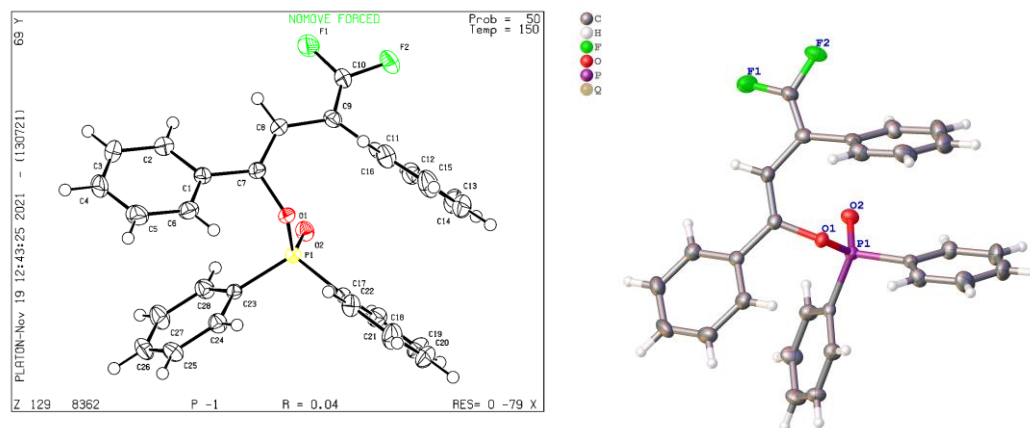

CCDC number: 2131663

**Table S3 Crystal data and structure refinement for product 3aa.**

|                                    |                                                                 |
|------------------------------------|-----------------------------------------------------------------|
| Identification code                | <b>3aa</b>                                                      |
| Empirical formula                  | C <sub>28</sub> H <sub>21</sub> F <sub>2</sub> O <sub>2</sub> P |
| Formula weight                     | 458.42                                                          |
| Temperature/K                      | 149.99(10)                                                      |
| Crystal system                     | triclinic                                                       |
| Space group                        | P-1                                                             |
| a/Å                                | 6.1385(4)                                                       |
| b/Å                                | 11.7600(8)                                                      |
| c/Å                                | 17.0258(11)                                                     |
| α/°                                | 104.208(6)                                                      |
| β/°                                | 96.087(5)                                                       |
| γ/°                                | 103.597(6)                                                      |
| Volume/Å <sup>3</sup>              | 1140.47(14)                                                     |
| Z                                  | 2                                                               |
| ρ <sub>calc</sub> /cm <sup>3</sup> | 1.335                                                           |
| μ/mm <sup>-1</sup>                 | 0.160                                                           |
| F(000)                             | 476.0                                                           |
| Crystal size/mm <sup>3</sup>       | 0.14 × 0.12 × 0.11                                              |
| Radiation                          | Mo Kα (λ = 0.71073)                                             |
| 2θ range for data collection/°     | 3.854 to 50                                                     |
| Index ranges                       | -7 ≤ h ≤ 7, -13 ≤ k ≤ 13, -20 ≤ l ≤ 17                          |
| Reflections collected              | 7518                                                            |
| Independent reflections            | 4016 [R <sub>int</sub> = 0.0266, R <sub>sigma</sub> = 0.0506]   |

|                                                |                                  |
|------------------------------------------------|----------------------------------|
| Data/restraints/parameters                     | 4016/0/298                       |
| Goodness-of-fit on $F^2$                       | 1.047                            |
| Final R indexes [ $I \geq 2\sigma(I)$ ]        | $R_1 = 0.0428$ , $wR_2 = 0.0947$ |
| Final R indexes [all data]                     | $R_1 = 0.0559$ , $wR_2 = 0.1041$ |
| Largest diff. peak/hole / $e \text{ \AA}^{-3}$ | 0.34/-0.39                       |

### Crystal structure determination of [product 3aa]

**Crystal Data** for  $C_{28}H_{21}F_2O_2P$  ( $M = 458.42 \text{ g/mol}$ ): triclinic, space group P-1 (no. 2),  $a = 6.1385(4) \text{ \AA}$ ,  $b = 11.7600(8) \text{ \AA}$ ,  $c = 17.0258(11) \text{ \AA}$ ,  $\alpha = 104.208(6)^\circ$ ,  $\beta = 96.087(5)^\circ$ ,  $\gamma = 103.597(6)^\circ$ ,  $V = 1140.47(14) \text{ \AA}^3$ ,  $Z = 2$ ,  $T = 149.99(10) \text{ K}$ ,  $\mu(\text{Mo K}\alpha) = 0.160 \text{ mm}^{-1}$ ,  $D_{\text{calc}} = 1.335 \text{ g/cm}^3$ , 7518 reflections measured ( $3.854^\circ \leq 2\theta \leq 50^\circ$ ), 4016 unique ( $R_{\text{int}} = 0.0266$ ,  $R_{\text{sigma}} = 0.0506$ ) which were used in all calculations. The final  $R_1$  was 0.0428 ( $I > 2\sigma(I)$ ) and  $wR_2$  was 0.1041 (all data).

### (Z)-2-(5,5-Difluoro-1,3-dioxo-2-phenyl-2,3,5,6-tetrahydro-1H-[1,2,4]triazolo[1,2-a]cinnolin-6-yl)-1-phenylvinyl diphenylphosphinate (10):

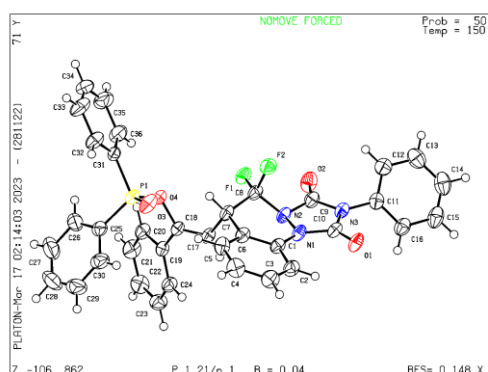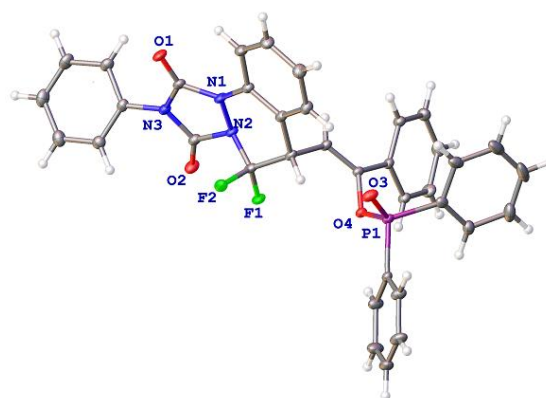

CCDC number: 2249356

### Table S4 Crystal data and structure refinement for product 10.

|                        |                          |
|------------------------|--------------------------|
| Identification code    | <b>10</b>                |
| Empirical formula      | $C_{36}H_{26}F_2N_3O_4P$ |
| Formula weight         | 633.57                   |
| Temperature/K          | 149.99(10)               |
| Crystal system         | monoclinic               |
| Space group            | $P2_1/n$                 |
| $a/\text{\AA}$         | 13.6060(3)               |
| $b/\text{\AA}$         | 16.1758(4)               |
| $c/\text{\AA}$         | 14.0833(3)               |
| $\alpha/^\circ$        | 90                       |
| $\beta/^\circ$         | 98.198(2)                |
| $\gamma/^\circ$        | 90                       |
| Volume/ $\text{\AA}^3$ | 3067.89(12)              |

|                                                |                                                               |
|------------------------------------------------|---------------------------------------------------------------|
| Z                                              | 4                                                             |
| $\rho_{\text{calc}}/\text{cm}^3$               | 1.372                                                         |
| $\mu/\text{mm}^{-1}$                           | 1.286                                                         |
| F(000)                                         | 1312.0                                                        |
| Crystal size/ $\text{mm}^3$                    | $0.16 \times 0.13 \times 0.1$                                 |
| Radiation                                      | Cu K $\alpha$ ( $\lambda = 1.54184$ )                         |
| 2 $\Theta$ range for data collection/ $^\circ$ | 8.374 to 148.334                                              |
| Index ranges                                   | $-16 \leq h \leq 16, -19 \leq k \leq 18, -17 \leq l \leq 12$  |
| Reflections collected                          | 12151                                                         |
| Independent reflections                        | 6063 [ $R_{\text{int}} = 0.0279, R_{\text{sigma}} = 0.0358$ ] |
| Data/restraints/parameters                     | 6063/0/416                                                    |
| Goodness-of-fit on $F^2$                       | 1.025                                                         |
| Final R indexes [ $I \geq 2\sigma(I)$ ]        | $R_1 = 0.0417, wR_2 = 0.1071$                                 |
| Final R indexes [all data]                     | $R_1 = 0.0475, wR_2 = 0.1131$                                 |
| Largest diff. peak/hole / $e \text{ \AA}^{-3}$ | 0.34/-0.38                                                    |

### Crystal structure determination of [10]

**Crystal Data** for  $\text{C}_{36}\text{H}_{26}\text{F}_2\text{N}_3\text{O}_4\text{P}$  ( $M = 633.57$  g/mol): monoclinic, space group  $P2_1/n$  (no. 14),  $a = 13.6060(3)$   $\text{\AA}$ ,  $b = 16.1758(4)$   $\text{\AA}$ ,  $c = 14.0833(3)$   $\text{\AA}$ ,  $\beta = 98.198(2)^\circ$ ,  $V = 3067.89(12)$   $\text{\AA}^3$ ,  $Z = 4$ ,  $T = 149.99(10)$  K,  $\mu(\text{Cu K}\alpha) = 1.286$   $\text{mm}^{-1}$ ,  $D_{\text{calc}} = 1.372$   $\text{g/cm}^3$ , 12151 reflections measured ( $8.374^\circ \leq 2\Theta \leq 148.334^\circ$ ), 6063 unique ( $R_{\text{int}} = 0.0279$ ,  $R_{\text{sigma}} = 0.0358$ ) which were used in all calculations. The final  $R_1$  was 0.0417 ( $I > 2\sigma(I)$ ) and  $wR_2$  was 0.1131 (all data).

### DFT calculation results

#### Computational details:

All calculations were performed using Gaussian 16, Revision A.03 package.<sup>[2]</sup> All of the reactants, intermediates, transition states, and products were optimized by the DFT with the M06-2X functional.<sup>[3]</sup> For geometry optimizations and frequency calculations, BS-I basis set system was employed. In BS-I, we employed LANL2DZ basis sets for Cs atom and 6-31+G(d) basis sets for H, C, O, F, and P. All the stationary structures were characterized with no imaginary frequency and the transition state structures (TSs) were characterized with a single imaginary frequency. Intrinsic reaction coordinate (IRC) calculations were performed on all the TSs. The solvent effect of water was evaluated through the SMD method,<sup>[4]</sup> in which a better basis system BS-II was used. In BS-II, we employed SDD basis set for Cs with effective core potentials, 6-311++G(d,p) basis sets for H, C, O, F, and P. All reported energies are free energies at a concentration of 1 M and a temperature of 298.15 K

#### Cartesian coordinates of the optimized structures:

##### 1a

E = -990.707115236 a.u.

O 1

O                    -3.80001100      1.60774500      2.05412600



|   |             |             |             |
|---|-------------|-------------|-------------|
| C | -4.56956100 | 1.64719500  | 1.11603700  |
| C | -5.02210600 | 0.40770000  | 0.41442600  |
| C | -5.74566200 | 0.46743200  | -0.78080300 |
| C | -4.68495100 | -0.83423000 | 0.96444700  |
| C | -6.13226900 | -0.70809300 | -1.42180600 |
| H | -5.99747100 | 1.42936000  | -1.22015200 |
| C | -5.07714800 | -2.00539200 | 0.32716100  |
| H | -4.11638800 | -0.85658500 | 1.88909600  |
| C | -5.80101800 | -1.94268900 | -0.86624200 |
| H | -6.68961900 | -0.65974300 | -2.35207600 |
| H | -4.82000700 | -2.96889800 | 0.75632000  |
| H | -6.10536600 | -2.85887000 | -1.36368800 |
| C | -5.13371000 | 2.95883100  | 0.64464700  |
| H | -6.21788800 | 3.04224500  | 0.61786800  |
| C | -4.37554000 | 4.00367600  | 0.30071500  |
| C | -2.89436600 | 3.97172800  | 0.18070700  |
| C | -2.29910600 | 2.97403500  | -0.59961600 |
| C | -2.08355900 | 4.91532000  | 0.82069700  |
| C | -0.91520100 | 2.90964400  | -0.72831800 |
| H | -2.92774000 | 2.25100700  | -1.11456900 |
| C | -0.69858500 | 4.84738300  | 0.69102400  |
| H | -2.53102400 | 5.68872800  | 1.43571200  |
| C | -0.11137600 | 3.84717400  | -0.08190800 |
| H | -0.46637500 | 2.13048800  | -1.33672900 |
| H | -0.07689900 | 5.57726100  | 1.20043100  |
| H | 0.96879700  | 3.79930900  | -0.18121700 |
| C | -5.05247900 | 5.30023200  | -0.07902300 |
| F | -4.66731500 | 5.71123500  | -1.29778000 |
| F | -4.74735500 | 6.28888800  | 0.78315500  |
| F | -6.39135600 | 5.20325500  | -0.09910100 |

### 3aa

E = -1770.54727465 a.u.

0 1

|   |             |            |            |
|---|-------------|------------|------------|
| O | -4.81567400 | 0.06828700 | 1.42569800 |
| C | -3.67852700 | 0.17997000 | 0.63812300 |
| C | -2.94205900 | 1.45287800 | 0.80276900 |
| C | -1.56760600 | 1.53756000 | 0.54437600 |
| C | -3.60952200 | 2.58602800 | 1.28524900 |
| C | -0.88194400 | 2.73061600 | 0.75239600 |
| H | -1.02315900 | 0.65684800 | 0.21647900 |
| C | -2.92086500 | 3.77568600 | 1.50010100 |
| H | -4.67024700 | 2.52317900 | 1.50683500 |
| C | -1.55456600 | 3.85390700 | 1.23329400 |

|   |              |             |             |
|---|--------------|-------------|-------------|
| H | 0.18523300   | 2.77687300  | 0.55640500  |
| H | -3.45254900  | 4.64132200  | 1.88434400  |
| H | -1.01521800  | 4.78015000  | 1.40748700  |
| C | -3.32817500  | -0.81796000 | -0.18880500 |
| H | -2.44693500  | -0.66168600 | -0.80270200 |
| C | -4.00984600  | -2.10825600 | -0.33249800 |
| C | -5.45273700  | -2.31614800 | -0.02438900 |
| C | -6.41624300  | -1.50437900 | -0.63441800 |
| C | -5.86212800  | -3.31584700 | 0.86004700  |
| C | -7.76836200  | -1.70143100 | -0.37515200 |
| H | -6.09556000  | -0.71459500 | -1.30961200 |
| C | -7.21890500  | -3.51260300 | 1.11921200  |
| H | -5.11176700  | -3.91456000 | 1.36798100  |
| C | -8.17385000  | -2.70957400 | 0.50212500  |
| H | -8.50812700  | -1.06639100 | -0.85474400 |
| H | -7.52593600  | -4.28559500 | 1.81788100  |
| H | -9.22921100  | -2.85711300 | 0.71305500  |
| C | -3.30039700  | -3.13003500 | -0.81450000 |
| F | -3.76044300  | -4.34353000 | -1.05364600 |
| F | -2.01712000  | -3.06784300 | -1.13909000 |
| P | -4.68503900  | -0.64255800 | 2.90294400  |
| O | -3.83877600  | -1.86282600 | 2.94718900  |
| C | -6.42950400  | -0.88388200 | 3.27267000  |
| C | -7.43378300  | -0.10678700 | 2.68931300  |
| C | -6.75995200  | -1.89454800 | 4.18141500  |
| C | -8.76702400  | -0.33532000 | 3.02478800  |
| H | -7.17338200  | 0.65240800  | 1.95703300  |
| C | -8.09353800  | -2.12131000 | 4.51040700  |
| H | -5.97144800  | -2.51057500 | 4.60648300  |
| C | -9.09567700  | -1.33958100 | 3.93404400  |
| H | -9.54938700  | 0.26127000  | 2.56488400  |
| H | -8.35215000  | -2.91028500 | 5.21016700  |
| H | -10.13609100 | -1.51884400 | 4.18964600  |
| C | -4.03481700  | 0.69639200  | 3.93016500  |
| C | -4.84925700  | 1.71490800  | 4.43219200  |
| C | -2.64738500  | 0.76360600  | 4.09322700  |
| C | -4.27516100  | 2.80688200  | 5.08025400  |
| H | -5.92916300  | 1.65861700  | 4.31634900  |
| C | -2.07620600  | 1.86296200  | 4.72892400  |
| H | -2.02701200  | -0.04140900 | 3.70732500  |
| C | -2.88949500  | 2.88550900  | 5.21792400  |
| H | -4.90789300  | 3.59642000  | 5.47484900  |
| H | -0.99777200  | 1.92360100  | 4.83959800  |
| H | -2.44272500  | 3.74317900  | 5.71253200  |

**I2**

E = -1966.65848961 a.u.

0 1

|    |             |             |             |
|----|-------------|-------------|-------------|
| P  | 0.16334200  | -0.00127300 | -0.31856600 |
| O  | 0.39123700  | 1.44260700  | 0.25893500  |
| C  | 1.12984200  | -0.03086700 | -1.90014300 |
| C  | 1.02448500  | -1.09920700 | -2.79840300 |
| C  | 1.85535700  | 1.10012600  | -2.28068400 |
| C  | 1.65699500  | -1.05314700 | -4.03909100 |
| H  | 0.42466700  | -1.96980700 | -2.53456200 |
| C  | 2.48212700  | 1.15562100  | -3.52573700 |
| H  | 1.89674700  | 1.94175500  | -1.59310800 |
| C  | 2.38572200  | 0.07962100  | -4.40787400 |
| H  | 1.57157900  | -1.89238100 | -4.72455800 |
| H  | 3.04247100  | 2.04243500  | -3.81220400 |
| H  | 2.87096700  | 0.12297600  | -5.37912800 |
| C  | 1.22014100  | -1.10382300 | 0.74968300  |
| C  | 1.91893100  | -0.57285300 | 1.84024800  |
| C  | 1.18804600  | -2.49692600 | 0.59691100  |
| C  | 2.56994400  | -1.41039400 | 2.74977400  |
| H  | 1.96121000  | 0.50707700  | 1.96792300  |
| C  | 1.84105700  | -3.33647500 | 1.49667900  |
| H  | 0.63363200  | -2.93495600 | -0.23304000 |
| C  | 2.53085200  | -2.79411300 | 2.58409100  |
| H  | 3.11447800  | -0.97974800 | 3.58661300  |
| H  | 1.80668700  | -4.41365900 | 1.35658800  |
| H  | 3.03415700  | -3.44648000 | 3.29199400  |
| Cs | -1.09942800 | 1.94005300  | 2.76128700  |
| O  | -2.94197700 | 1.67412700  | 0.39465900  |
| C  | -2.92072200 | 1.02890900  | -0.64481800 |
| C  | -2.21654100 | 1.51705600  | -1.86109200 |
| C  | -2.06755700 | 0.71949100  | -3.00262000 |
| C  | -1.63958300 | 2.79162500  | -1.82915800 |
| C  | -1.35922900 | 1.19464900  | -4.10173500 |
| H  | -2.45741300 | -0.29433600 | -3.02079100 |
| C  | -0.94305700 | 3.26953400  | -2.93231400 |
| H  | -1.72851600 | 3.38276100  | -0.92416900 |
| C  | -0.80246000 | 2.47221900  | -4.06925900 |
| H  | -1.21878900 | 0.55958900  | -4.97070600 |
| H  | -0.49015000 | 4.25583400  | -2.90028100 |
| H  | -0.23730300 | 2.83631100  | -4.92229100 |
| C  | -3.70944600 | -0.24268600 | -0.74101400 |
| H  | -4.19762800 | -0.44458200 | -1.69009300 |

|   |             |             |             |
|---|-------------|-------------|-------------|
| C | -3.88537600 | -1.10404100 | 0.26405600  |
| C | -3.25779600 | -1.07372100 | 1.61792600  |
| C | -3.93651700 | -0.54410400 | 2.72063600  |
| C | -2.01374300 | -1.68443500 | 1.80160500  |
| C | -3.37122500 | -0.62824500 | 3.99327100  |
| H | -4.90715400 | -0.07770700 | 2.57821300  |
| C | -1.43666700 | -1.74971000 | 3.07092000  |
| H | -1.49570200 | -2.10423600 | 0.94673000  |
| C | -2.12183700 | -1.23051100 | 4.17020300  |
| H | -3.91316700 | -0.23526700 | 4.84915900  |
| H | -0.45920000 | -2.21303000 | 3.18818300  |
| H | -1.68946300 | -1.30337200 | 5.16452500  |
| C | -4.76207900 | -2.31494900 | 0.03803100  |
| F | -5.77007500 | -2.34892300 | 0.92977100  |
| F | -4.06613600 | -3.45468500 | 0.19159400  |
| F | -5.31552200 | -2.35053100 | -1.18311400 |
| O | 1.60435700  | 3.02688000  | 1.92422100  |
| H | 1.34075400  | 2.45827000  | 1.14458400  |
| H | 2.43872300  | 3.45524500  | 1.69791700  |

## TS1-2

E = -1966.65646749 a.u.

0 1

|   |             |             |             |
|---|-------------|-------------|-------------|
| P | 0.27671600  | 0.04995900  | -0.10147000 |
| O | 0.78664400  | 1.30680600  | 0.69657000  |
| C | 1.16048600  | 0.16791200  | -1.73044200 |
| C | 1.24577600  | -0.90429200 | -2.62833200 |
| C | 1.64821000  | 1.41622500  | -2.12695000 |
| C | 1.81647100  | -0.73646900 | -3.88778800 |
| H | 0.87685700  | -1.88677700 | -2.33651100 |
| C | 2.21177200  | 1.59008400  | -3.39231300 |
| H | 1.58376200  | 2.24377900  | -1.42437900 |
| C | 2.29739100  | 0.51631600  | -4.27706200 |
| H | 1.89096400  | -1.58272000 | -4.56625000 |
| H | 2.58775400  | 2.56688600  | -3.68732200 |
| H | 2.74113300  | 0.64950500  | -5.26003000 |
| C | 1.19799100  | -1.40923600 | 0.58834900  |
| C | 2.32197500  | -1.23222800 | 1.40065200  |
| C | 0.72853800  | -2.70944700 | 0.36679100  |
| C | 2.97576000  | -2.32936600 | 1.95987700  |
| H | 2.67875800  | -0.22179200 | 1.58560600  |
| C | 1.38370900  | -3.81212200 | 0.91585100  |
| H | -0.17084700 | -2.86140700 | -0.23116200 |
| C | 2.51057900  | -3.62271900 | 1.71557600  |

|    |             |             |             |
|----|-------------|-------------|-------------|
| H  | 3.85154500  | -2.17847900 | 2.58583700  |
| H  | 1.00731100  | -4.81477800 | 0.73156800  |
| H  | 3.01872700  | -4.47751700 | 2.15283700  |
| Cs | -1.31271300 | 2.49227900  | 2.41410300  |
| O  | -3.15458700 | 1.67003000  | 0.15808700  |
| C  | -2.90615000 | 0.91065800  | -0.77098400 |
| C  | -2.27687600 | 1.40845200  | -2.02657400 |
| C  | -1.80939500 | 0.54623100  | -3.02549300 |
| C  | -2.14394700 | 2.79211700  | -2.19522700 |
| C  | -1.22405600 | 1.06053300  | -4.17754100 |
| H  | -1.84920600 | -0.53038800 | -2.88757500 |
| C  | -1.55995200 | 3.30537700  | -3.34736800 |
| H  | -2.51182200 | 3.45163800  | -1.41533300 |
| C  | -1.10064400 | 2.43879500  | -4.34063500 |
| H  | -0.83245700 | 0.38410200  | -4.93032100 |
| H  | -1.45919700 | 4.37929400  | -3.47234800 |
| H  | -0.63020000 | 2.83691500  | -5.23495200 |
| C  | -3.33457000 | -0.52201000 | -0.71208100 |
| H  | -3.56583100 | -1.00309200 | -1.65710300 |
| C  | -3.46121700 | -1.23227900 | 0.41254600  |
| C  | -3.16618500 | -0.80043700 | 1.80906200  |
| C  | -4.10777300 | -0.06787800 | 2.54015400  |
| C  | -1.97933400 | -1.21087500 | 2.42664200  |
| C  | -3.86752200 | 0.24530200  | 3.87700300  |
| H  | -5.02538600 | 0.25156400  | 2.05528300  |
| C  | -1.73377900 | -0.88271800 | 3.76116100  |
| H  | -1.24537500 | -1.78233900 | 1.86657400  |
| C  | -2.68055500 | -0.16404600 | 4.49104600  |
| H  | -4.61259000 | 0.79792400  | 4.44243500  |
| H  | -0.80317500 | -1.19807300 | 4.22375800  |
| H  | -2.49862300 | 0.07066000  | 5.53620400  |
| C  | -3.91130800 | -2.67262400 | 0.30933000  |
| F  | -5.00256800 | -2.88874600 | 1.06491200  |
| F  | -2.95814800 | -3.51418400 | 0.74835000  |
| F  | -4.21742200 | -3.04448500 | -0.94259600 |
| O  | 1.62801000  | 2.21537700  | 3.00244400  |
| H  | 1.53137700  | 1.78912500  | 2.10516300  |
| H  | 2.57224300  | 2.27926700  | 3.18874600  |

## II

E = -1966.65729884 a.u.

0 1

|   |             |             |            |
|---|-------------|-------------|------------|
| P | -0.13552900 | -1.74569400 | 2.15912900 |
| O | 0.02878000  | -0.21841500 | 2.52922500 |

|    |             |             |             |
|----|-------------|-------------|-------------|
| C  | 0.30602400  | -1.84505600 | 0.34825700  |
| C  | -0.09077600 | -2.95106800 | -0.41435700 |
| C  | 1.01307600  | -0.81665100 | -0.28536700 |
| C  | 0.23982400  | -3.04718400 | -1.76696300 |
| H  | -0.67276700 | -3.74299400 | 0.05781200  |
| C  | 1.34451500  | -0.90832600 | -1.63725200 |
| H  | 1.31069300  | 0.05588800  | 0.29392800  |
| C  | 0.96124200  | -2.02417500 | -2.38209200 |
| H  | -0.07550300 | -3.91334500 | -2.34365200 |
| H  | 1.89850700  | -0.10383400 | -2.11540500 |
| H  | 1.20845900  | -2.08784800 | -3.43841000 |
| C  | 1.43988100  | -2.50672600 | 2.80224900  |
| C  | 1.90263500  | -3.76013300 | 2.38150600  |
| C  | 2.14106300  | -1.84301300 | 3.81455700  |
| C  | 3.04622800  | -4.32449200 | 2.94063000  |
| H  | 1.37200700  | -4.29782400 | 1.59785100  |
| C  | 3.28838100  | -2.40591400 | 4.37785900  |
| H  | 1.77551400  | -0.87895900 | 4.16169300  |
| C  | 3.74612300  | -3.64739800 | 3.94174700  |
| H  | 3.39586300  | -5.29329600 | 2.59364700  |
| H  | 3.82240000  | -1.87495700 | 5.16207300  |
| H  | 4.63795700  | -4.08769500 | 4.37866400  |
| Cs | -0.78194800 | 2.54922600  | 2.10390100  |
| O  | -2.05597700 | 1.12152500  | -0.20899700 |
| C  | -2.27052100 | 0.04709500  | -0.75680800 |
| C  | -1.96853200 | -0.12221400 | -2.21197100 |
| C  | -2.42695900 | -1.20601400 | -2.96844500 |
| C  | -1.19842700 | 0.86805600  | -2.83515700 |
| C  | -2.11834900 | -1.29686000 | -4.32441300 |
| H  | -3.03460900 | -1.98401000 | -2.51904700 |
| C  | -0.88095300 | 0.77244700  | -4.18338500 |
| H  | -0.84168700 | 1.69982000  | -2.23625400 |
| C  | -1.34141300 | -0.31349800 | -4.93150400 |
| H  | -2.48209100 | -2.14022900 | -4.90321300 |
| H  | -0.27174500 | 1.53854100  | -4.65356800 |
| H  | -1.09433200 | -0.39097400 | -5.98636700 |
| C  | -2.82476500 | -1.12011300 | -0.02282900 |
| H  | -2.78096500 | -2.07144300 | -0.53721500 |
| C  | -3.28489100 | -1.12650400 | 1.23834700  |
| C  | -3.51235000 | 0.03276400  | 2.14253800  |
| C  | -4.33351500 | 1.08765900  | 1.72390000  |
| C  | -2.97543900 | 0.05361000  | 3.43613200  |
| C  | -4.61168100 | 2.15050600  | 2.57902600  |
| H  | -4.75501800 | 1.06760600  | 0.72291900  |

|   |             |             |            |
|---|-------------|-------------|------------|
| C | -3.26223200 | 1.11667800  | 4.29359800 |
| H | -2.31106500 | -0.74203100 | 3.75410300 |
| C | -4.08043900 | 2.16440200  | 3.87158100 |
| H | -5.25917400 | 2.95580400  | 2.24467300 |
| H | -2.84436800 | 1.11817000  | 5.29626300 |
| H | -4.31483600 | 2.98171900  | 4.54811300 |
| C | -3.84246200 | -2.44508600 | 1.75204100 |
| F | -5.19182400 | -2.41320100 | 1.66581200 |
| F | -3.54866300 | -2.68742200 | 3.03185500 |
| F | -3.43360000 | -3.50253800 | 1.03703700 |
| O | 2.01903700  | 1.44644200  | 2.33965900 |
| H | 2.91910400  | 1.10917600  | 2.43600500 |
| H | 1.40418700  | 0.65536200  | 2.44118000 |

### TS1-2'

E = -1890.24207678 a.u.

0 1

|    |             |             |             |
|----|-------------|-------------|-------------|
| P  | 0.15440800  | -0.93086800 | -0.19334200 |
| O  | 0.03966800  | -0.81692200 | 1.35041300  |
| C  | 1.36033300  | 0.41254600  | -0.67406800 |
| C  | 1.11095400  | 1.27471600  | -1.74538900 |
| C  | 2.48603200  | 0.64418800  | 0.13183200  |
| C  | 1.96689600  | 2.34972200  | -2.00977800 |
| H  | 0.23758400  | 1.11268300  | -2.37399700 |
| C  | 3.34131900  | 1.71258900  | -0.12782900 |
| H  | 2.67937700  | -0.02996600 | 0.96555800  |
| C  | 3.07821400  | 2.57263500  | -1.20019900 |
| H  | 1.76092000  | 3.01197300  | -2.84636300 |
| H  | 4.21999000  | 1.87194700  | 0.49238900  |
| H  | 3.74474500  | 3.40566100  | -1.40577500 |
| C  | 1.19480600  | -2.40881100 | -0.55466400 |
| C  | 1.66321800  | -2.67474000 | -1.84739000 |
| C  | 1.44643900  | -3.32655100 | 0.46820700  |
| C  | 2.38888400  | -3.83344900 | -2.10952800 |
| H  | 1.46729800  | -1.96389700 | -2.65000200 |
| C  | 2.17070500  | -4.49061100 | 0.20439900  |
| H  | 1.07103600  | -3.10867200 | 1.46540800  |
| C  | 2.64289400  | -4.74574200 | -1.08200500 |
| H  | 2.75795700  | -4.02829300 | -3.11289900 |
| H  | 2.36594800  | -5.19987600 | 1.00438000  |
| H  | 3.20581700  | -5.65195000 | -1.28699400 |
| Cs | -0.23820800 | 2.08301800  | 2.00139300  |
| O  | -2.16709600 | 1.29943600  | -0.13630900 |
| C  | -2.32596900 | 0.25339100  | -0.77295700 |

|   |             |             |             |
|---|-------------|-------------|-------------|
| C | -2.31136100 | 0.30480200  | -2.27872300 |
| C | -2.07339600 | -0.81185300 | -3.08966900 |
| C | -2.54428900 | 1.54570700  | -2.87807800 |
| C | -2.06709200 | -0.68376000 | -4.47463700 |
| H | -1.83825600 | -1.77246200 | -2.63989600 |
| C | -2.54265800 | 1.67313600  | -4.26613900 |
| H | -2.72005500 | 2.40536800  | -2.23879500 |
| C | -2.30218000 | 0.55898400  | -5.06756300 |
| H | -1.86560700 | -1.55292600 | -5.09358900 |
| H | -2.72829100 | 2.64188000  | -4.72085500 |
| H | -2.29391400 | 0.65580200  | -6.14925400 |
| C | -2.76901800 | -1.01323100 | -0.13498700 |
| H | -2.90987800 | -1.84949000 | -0.80924400 |
| C | -2.99881300 | -1.22384700 | 1.17380100  |
| C | -2.95863000 | -0.25162500 | 2.29944900  |
| C | -3.77259300 | 0.88764100  | 2.28165200  |
| C | -2.16694500 | -0.50109500 | 3.42986300  |
| C | -3.78312300 | 1.77189200  | 3.35941300  |
| H | -4.39160600 | 1.08122000  | 1.41121900  |
| C | -2.19014200 | 0.37593900  | 4.51432500  |
| H | -1.50125300 | -1.35686700 | 3.43049200  |
| C | -2.99548600 | 1.51630000  | 4.48417200  |
| H | -4.42321500 | 2.64909700  | 3.32885000  |
| H | -1.57660800 | 0.16447500  | 5.38597300  |
| H | -3.02161100 | 2.19170200  | 5.33497000  |
| C | -3.38605600 | -2.62438800 | 1.58936600  |
| F | -4.49570500 | -2.61558100 | 2.35601500  |
| F | -2.42564900 | -3.22582800 | 2.31871700  |
| F | -3.64049900 | -3.43603500 | 0.54993900  |

## II'

E = -1890.24283963 a.u.

0 1

|   |             |             |             |
|---|-------------|-------------|-------------|
| P | 0.14813500  | -1.22116200 | -0.39828500 |
| O | -0.15909400 | -0.97353900 | 1.11623600  |
| C | 1.34246600  | 0.17795600  | -0.80152000 |
| C | 0.95268400  | 1.20175500  | -1.67091600 |
| C | 2.53890300  | 0.33379700  | -0.08351700 |
| C | 1.71987300  | 2.36464400  | -1.80678900 |
| H | 0.02980400  | 1.09694100  | -2.23904400 |
| C | 3.31052000  | 1.48707000  | -0.21474800 |
| H | 2.85550900  | -0.46144000 | 0.59041800  |
| C | 2.89572600  | 2.51228400  | -1.07316400 |
| H | 1.39903500  | 3.14989700  | -2.48647900 |



|    |             |             |             |
|----|-------------|-------------|-------------|
| H  | 4.23996900  | 1.58788700  | 0.34054600  |
| H  | 3.49708600  | 3.41114200  | -1.17917100 |
| C  | 1.39220000  | -2.59522700 | -0.41993900 |
| C  | 2.04633100  | -2.97344200 | -1.59864500 |
| C  | 1.63884400  | -3.31203500 | 0.75305700  |
| C  | 2.94574300  | -4.03637900 | -1.60119100 |
| H  | 1.85574800  | -2.42370700 | -2.52013700 |
| C  | 2.53553300  | -4.38307800 | 0.75226100  |
| H  | 1.11857400  | -3.01069000 | 1.65972900  |
| C  | 3.19133100  | -4.74623400 | -0.42276500 |
| H  | 3.45490100  | -4.31594100 | -2.51984800 |
| H  | 2.72167700  | -4.93570200 | 1.66974100  |
| H  | 3.88837300  | -5.57962400 | -0.42470100 |
| Cs | -0.06472100 | 1.90367400  | 1.81440300  |
| O  | -2.24617000 | 1.40268000  | -0.20407300 |
| C  | -2.56877200 | 0.42884900  | -0.87738200 |
| C  | -2.60671000 | 0.55093000  | -2.37179000 |
| C  | -2.43404800 | -0.54119800 | -3.22996500 |
| C  | -2.79366200 | 1.82860300  | -2.91075300 |
| C  | -2.45094600 | -0.35237300 | -4.60910800 |
| H  | -2.22553800 | -1.52608100 | -2.82374700 |
| C  | -2.82320100 | 2.01327100  | -4.28994000 |
| H  | -2.91454300 | 2.66799500  | -2.23265400 |
| C  | -2.65062100 | 0.92182800  | -5.14129800 |
| H  | -2.29659300 | -1.20025000 | -5.26931800 |
| H  | -2.97923600 | 3.00615800  | -4.70114800 |
| H  | -2.66612700 | 1.06401900  | -6.21789900 |
| C  | -3.00065800 | -0.85873800 | -0.27944600 |
| H  | -3.23719900 | -1.64733700 | -0.98236500 |
| C  | -3.08899700 | -1.14361600 | 1.03062500  |
| C  | -2.93057800 | -0.24046200 | 2.20103200  |
| C  | -3.69152400 | 0.93075900  | 2.29066400  |
| C  | -2.08686600 | -0.58740700 | 3.26614800  |
| C  | -3.59529900 | 1.75752200  | 3.40880000  |
| H  | -4.35542800 | 1.19616200  | 1.47362300  |
| C  | -2.00347600 | 0.23325000  | 4.39031800  |
| H  | -1.46033400 | -1.46748100 | 3.17886400  |
| C  | -2.75274500 | 1.40916700  | 4.46617200  |
| H  | -4.19421600 | 2.66210800  | 3.46202200  |
| H  | -1.34887800 | -0.04980800 | 5.21013200  |
| H  | -2.69307200 | 2.04097100  | 5.34811000  |
| C  | -3.48013100 | -2.56236800 | 1.39926800  |
| F  | -4.51798000 | -2.56327800 | 2.25951800  |
| F  | -2.47813700 | -3.22402800 | 1.99954400  |

|   |             |             |            |
|---|-------------|-------------|------------|
| F | -3.85322200 | -3.29958300 | 0.34178800 |
|---|-------------|-------------|------------|

### I3

E = -1890.25355233 a.u.

0 1

|   |             |             |             |
|---|-------------|-------------|-------------|
| O | -4.41665600 | 0.04333500  | 0.97064100  |
| C | -5.44171900 | 0.86168100  | 0.81142600  |
| C | -6.58124100 | 0.31109300  | -0.06325000 |
| C | -7.75673400 | 1.01201300  | -0.36532900 |
| C | -6.44525100 | -1.00144800 | -0.52124200 |
| C | -8.78417700 | 0.39840400  | -1.08077600 |
| H | -7.90052000 | 2.03381600  | -0.02385500 |
| C | -7.46666900 | -1.61196000 | -1.24733100 |
| H | -5.52739700 | -1.52245600 | -0.26893300 |
| C | -8.64583500 | -0.91908700 | -1.52037500 |
| H | -9.69367400 | 0.95282600  | -1.29540600 |
| H | -7.34699600 | -2.63542800 | -1.59276900 |
| H | -9.44721700 | -1.39574500 | -2.07768800 |
| C | -5.15566300 | 2.30208100  | 0.44185200  |
| H | -6.02891900 | 2.90209900  | 0.20069300  |
| C | -3.98368300 | 2.95467200  | 0.46487700  |
| C | -2.61779400 | 2.40775300  | 0.69657400  |
| C | -2.12901400 | 1.36309000  | -0.10114100 |
| C | -1.76766600 | 2.97727700  | 1.65436100  |
| C | -0.82914800 | 0.89222000  | 0.06729000  |
| H | -2.78923500 | 0.91222200  | -0.83307000 |
| C | -0.46340900 | 2.50562000  | 1.82194200  |
| H | -2.13014700 | 3.78591500  | 2.28096200  |
| C | 0.01137300  | 1.46166100  | 1.02871700  |
| H | -0.46685700 | 0.08486100  | -0.56304600 |
| H | 0.18271000  | 2.96609500  | 2.56432400  |
| H | 1.03167600  | 1.10600700  | 1.14381400  |
| C | -4.00962400 | 4.44077500  | 0.19859500  |
| F | -3.05372800 | 4.81251400  | -0.67426700 |
| F | -3.78546400 | 5.16075600  | 1.32736500  |
| F | -5.17808700 | 4.88090000  | -0.29396200 |
| P | -6.13270200 | 1.08940200  | 2.63971200  |
| O | -4.97548500 | 1.44170900  | 3.55623200  |
| C | -6.85475500 | -0.51148100 | 3.15385700  |
| C | -7.83719700 | -1.22180500 | 2.45041300  |
| C | -6.35821900 | -1.04230300 | 4.35064700  |
| C | -8.29876800 | -2.44447900 | 2.93577200  |
| H | -8.24527500 | -0.83764400 | 1.52047000  |
| C | -6.82314300 | -2.26390500 | 4.83480400  |

|    |              |             |            |
|----|--------------|-------------|------------|
| H  | -5.62046300  | -0.46898500 | 4.90678000 |
| C  | -7.79214400  | -2.96986300 | 4.12358000 |
| H  | -9.05577500  | -2.98741400 | 2.37733200 |
| H  | -6.43679600  | -2.65984000 | 5.76995000 |
| H  | -8.15631600  | -3.92292400 | 4.49638600 |
| C  | -7.44761000  | 2.34646300  | 2.77841600 |
| C  | -8.81553200  | 2.07036300  | 2.68835400 |
| C  | -7.02132400  | 3.67337100  | 2.92683800 |
| C  | -9.74441800  | 3.10934900  | 2.73245200 |
| H  | -9.16353600  | 1.04606400  | 2.58960200 |
| C  | -7.95075000  | 4.70967800  | 2.96477600 |
| H  | -5.95830900  | 3.88296800  | 3.02003100 |
| C  | -9.31382300  | 4.42889400  | 2.86408600 |
| H  | -10.80531800 | 2.88612300  | 2.66613100 |
| H  | -7.61097900  | 5.73519200  | 3.07563500 |
| H  | -10.03928700 | 5.23662800  | 2.89483300 |
| Cs | -2.52620100  | -0.20177100 | 3.11375100 |

#### TS3-4

E = -1890.22883905 a.u.

0 1

|   |             |             |             |
|---|-------------|-------------|-------------|
| O | -4.73137300 | 0.54169200  | 1.85554800  |
| C | -5.71921800 | 1.13676700  | 0.99551900  |
| C | -6.39444800 | 0.18911200  | 0.06676300  |
| C | -7.29335400 | 0.61828000  | -0.92564700 |
| C | -6.14339300 | -1.18576600 | 0.17996800  |
| C | -7.94206000 | -0.29892400 | -1.74600800 |
| H | -7.49022800 | 1.67792000  | -1.06635900 |
| C | -6.78290700 | -2.10047400 | -0.65470600 |
| H | -5.45624500 | -1.52807600 | 0.94706400  |
| C | -7.69319500 | -1.66652900 | -1.61551200 |
| H | -8.63817000 | 0.05836400  | -2.49982700 |
| H | -6.57615300 | -3.16118100 | -0.54092000 |
| H | -8.19878100 | -2.38020400 | -2.25896600 |
| C | -5.41766900 | 2.47164600  | 0.47195200  |
| H | -6.29728900 | 3.04588100  | 0.18926000  |
| C | -4.23339300 | 3.12019500  | 0.39534300  |
| C | -2.89388900 | 2.50376600  | 0.50132000  |
| C | -2.70104300 | 1.18065700  | 0.06577200  |
| C | -1.77162600 | 3.22177200  | 0.95170700  |
| C | -1.43978300 | 0.59052300  | 0.10580900  |
| H | -3.54647600 | 0.62141900  | -0.32298600 |
| C | -0.50877000 | 2.63050700  | 0.98784200  |
| H | -1.88314100 | 4.25246700  | 1.27323900  |

|    |             |             |             |
|----|-------------|-------------|-------------|
| C  | -0.33548000 | 1.30987700  | 0.56914200  |
| H  | -1.31730000 | -0.42916700 | -0.24853700 |
| H  | 0.34423500  | 3.21164800  | 1.32746900  |
| H  | 0.65169400  | 0.85636000  | 0.57708200  |
| C  | -4.25581900 | 4.58937100  | 0.07449100  |
| F  | -3.37459000 | 4.91331800  | -0.89535400 |
| F  | -3.91743000 | 5.35179800  | 1.14595200  |
| F  | -5.45627600 | 5.02821200  | -0.33213200 |
| P  | -5.99906300 | 1.12573200  | 2.92611900  |
| O  | -5.12502400 | 1.40944500  | 4.14813700  |
| C  | -6.95157400 | -0.41307100 | 3.17276400  |
| C  | -8.18993200 | -0.67943600 | 2.58366000  |
| C  | -6.37795900 | -1.37408400 | 4.00987600  |
| C  | -8.83410800 | -1.89343000 | 2.81350800  |
| H  | -8.65294900 | 0.05188000  | 1.92821600  |
| C  | -7.01684900 | -2.59114400 | 4.23829900  |
| H  | -5.43223300 | -1.14874200 | 4.49664400  |
| C  | -8.24690300 | -2.85389600 | 3.63580100  |
| H  | -9.79230400 | -2.09086200 | 2.34193400  |
| H  | -6.56175300 | -3.32982200 | 4.89236700  |
| H  | -8.74919500 | -3.80082200 | 3.81207800  |
| C  | -7.26217700 | 2.49108000  | 3.07918300  |
| C  | -8.21923900 | 2.72103300  | 2.08471200  |
| C  | -7.26716700 | 3.30475700  | 4.21694900  |
| C  | -9.17334300 | 3.72663400  | 2.22664000  |
| H  | -8.21958600 | 2.11121600  | 1.18347700  |
| C  | -8.21228800 | 4.32153700  | 4.35705700  |
| H  | -6.51843000 | 3.12527000  | 4.98138800  |
| C  | -9.16904200 | 4.53221000  | 3.36545100  |
| H  | -9.91225100 | 3.88779500  | 1.44657900  |
| H  | -8.20200000 | 4.95041700  | 5.24321900  |
| H  | -9.90503300 | 5.32367400  | 3.47527200  |
| Cs | -2.32691700 | 0.88875000  | 3.61821800  |

#### I4

E = -1890.26321761 a.u.

0 1

|   |             |             |             |
|---|-------------|-------------|-------------|
| O | -5.05604600 | 0.59883800  | 1.62271800  |
| C | -5.67967400 | 0.78547900  | 0.36270200  |
| C | -6.42905600 | -0.37492200 | -0.14916200 |
| C | -7.50220200 | -0.21561700 | -1.04189300 |
| C | -6.10705100 | -1.67429100 | 0.27095500  |
| C | -8.22849800 | -1.31405600 | -1.48808900 |
| H | -7.78828400 | 0.78103500  | -1.36759700 |

|   |              |             |             |
|---|--------------|-------------|-------------|
| C | -6.84119500  | -2.77176800 | -0.17000000 |
| H | -5.28061400  | -1.81884500 | 0.96117400  |
| C | -7.90767000  | -2.60060900 | -1.05116500 |
| H | -9.05983900  | -1.16284300 | -2.17114100 |
| H | -6.57751600  | -3.76601200 | 0.18021200  |
| H | -8.48250800  | -3.45621700 | -1.39247900 |
| C | -5.43930100  | 1.93174000  | -0.32402400 |
| H | -6.03098500  | 2.02780800  | -1.23456300 |
| C | -4.54843400  | 3.01404400  | -0.01004900 |
| C | -3.17173000  | 2.85635800  | 0.36457200  |
| C | -2.55745000  | 1.57391200  | 0.47603900  |
| C | -2.30593000  | 3.96821200  | 0.60091600  |
| C | -1.22614200  | 1.42241400  | 0.84351200  |
| H | -3.13909200  | 0.68831500  | 0.24812600  |
| C | -0.97455500  | 3.80111700  | 0.96441500  |
| H | -2.68393600  | 4.97796000  | 0.48508300  |
| C | -0.41294900  | 2.52826400  | 1.12021000  |
| H | -0.81179000  | 0.41840200  | 0.90145600  |
| H | -0.36070900  | 4.68592200  | 1.11939500  |
| H | 0.63153200   | 2.40435200  | 1.38839700  |
| C | -5.00724800  | 4.35747100  | -0.40917500 |
| F | -4.29235900  | 4.96591300  | -1.39716000 |
| F | -4.98026400  | 5.27545700  | 0.61670000  |
| F | -6.29351000  | 4.35815200  | -0.84147100 |
| P | -5.82981400  | 0.60891100  | 3.04947900  |
| O | -4.82579200  | 0.30976800  | 4.12112200  |
| C | -7.17356200  | -0.58659200 | 3.00088700  |
| C | -8.36480100  | -0.33640600 | 2.31291900  |
| C | -6.96364900  | -1.81801100 | 3.62624500  |
| C | -9.32818100  | -1.33501800 | 2.21653800  |
| H | -8.52997800  | 0.62456100  | 1.83101100  |
| C | -7.93704800  | -2.81109400 | 3.53726200  |
| H | -6.03773600  | -1.98708800 | 4.16939200  |
| C | -9.11113100  | -2.57251800 | 2.82459800  |
| H | -10.24186200 | -1.15225700 | 1.65959200  |
| H | -7.77716800  | -3.77100000 | 4.01903900  |
| H | -9.86294700  | -3.35222200 | 2.74337200  |
| C | -6.54064900  | 2.25975300  | 3.32189700  |
| C | -7.05201800  | 3.10027200  | 2.32592000  |
| C | -6.55333100  | 2.68898300  | 4.65872200  |
| C | -7.54549600  | 4.36019500  | 2.66178200  |
| H | -7.04637400  | 2.78803900  | 1.28842500  |
| C | -7.05415400  | 3.94621600  | 4.99001700  |
| H | -6.16852800  | 2.02884200  | 5.43261200  |

|    |             |            |            |
|----|-------------|------------|------------|
| C  | -7.54576900 | 4.78500500 | 3.98873600 |
| H  | -7.91194700 | 5.01243400 | 1.87522500 |
| H  | -7.06448200 | 4.26840100 | 6.02721700 |
| H  | -7.92866500 | 5.76882300 | 4.24369800 |
| Cs | -2.92080300 | 2.67336700 | 3.71751500 |

## I6

E = -1890.24957734 a.u.

0 1

|   |             |             |             |
|---|-------------|-------------|-------------|
| O | -4.87326200 | 0.12229300  | 1.43157700  |
| C | -3.70812700 | 0.15357900  | 0.65428000  |
| C | -2.81954000 | 1.30535000  | 0.92417000  |
| C | -1.42666600 | 1.18706800  | 0.83224400  |
| C | -3.36250600 | 2.54110400  | 1.30534700  |
| C | -0.59962600 | 2.27375700  | 1.10930100  |
| H | -0.98729000 | 0.23102800  | 0.55755600  |
| C | -2.53727300 | 3.62275500  | 1.59093000  |
| H | -4.44092100 | 2.64413600  | 1.38397400  |
| C | -1.15060200 | 3.49428400  | 1.49576400  |
| H | 0.47818300  | 2.16130600  | 1.03483600  |
| H | -2.97775000 | 4.56931100  | 1.89097900  |
| H | -0.50583000 | 4.33796000  | 1.72286900  |
| C | -3.49052600 | -0.74140900 | -0.33097700 |
| H | -2.60632500 | -0.51867300 | -0.92349500 |
| C | -4.21543600 | -1.91991300 | -0.77419000 |
| C | -5.41916100 | -2.52167200 | -0.13727400 |
| C | -6.59348700 | -1.79296300 | 0.08433300  |
| C | -5.39152300 | -3.88348000 | 0.20545200  |
| C | -7.70599800 | -2.40145800 | 0.66144500  |
| H | -6.63228300 | -0.74434600 | -0.19706200 |
| C | -6.50575800 | -4.48660900 | 0.78613000  |
| H | -4.49199000 | -4.45501900 | -0.03119300 |
| C | -7.66407300 | -3.74685500 | 1.02357500  |
| H | -8.60821600 | -1.82024700 | 0.83338800  |
| H | -6.47228500 | -5.54242300 | 1.04153900  |
| H | -8.53300500 | -4.21614900 | 1.47697800  |
| C | -3.65035700 | -2.61486400 | -1.79148300 |
| F | -4.23928800 | -3.59105600 | -2.42464700 |
| F | -2.42286000 | -4.21906900 | -0.76710000 |
| F | -2.58552300 | -2.21121400 | -2.44405800 |
| P | -4.84475200 | -0.38615700 | 2.97771800  |
| O | -4.04136700 | -1.62216100 | 3.22496700  |
| C | -6.60806700 | -0.55283100 | 3.27676700  |
| C | -7.53691300 | 0.34314900  | 2.73450100  |

|    |              |             |            |
|----|--------------|-------------|------------|
| C  | -7.03899800  | -1.63006000 | 4.05200400 |
| C  | -8.89379700  | 0.16943200  | 2.98827800 |
| H  | -7.19966300  | 1.15436400  | 2.09383200 |
| C  | -8.40067700  | -1.80701900 | 4.29365200 |
| H  | -6.30951200  | -2.33732200 | 4.43670100 |
| C  | -9.32463000  | -0.90648200 | 3.76775800 |
| H  | -9.61668400  | 0.86096200  | 2.56595400 |
| H  | -8.73934500  | -2.65258000 | 4.88440000 |
| H  | -10.38507600 | -1.04622800 | 3.95616300 |
| C  | -4.20057300  | 1.00043400  | 3.94872300 |
| C  | -4.99193400  | 2.09041900  | 4.32032800 |
| C  | -2.83610500  | 0.99597100  | 4.25725300 |
| C  | -4.41622000  | 3.17868900  | 4.97369500 |
| H  | -6.05721200  | 2.09414900  | 4.10631700 |
| C  | -2.26138600  | 2.08679100  | 4.90202000 |
| H  | -2.22908200  | 0.14015600  | 3.97539200 |
| C  | -3.05107600  | 3.18097200  | 5.25593100 |
| H  | -5.03435800  | 4.02306400  | 5.26360300 |
| H  | -1.19832700  | 2.08662800  | 5.12283300 |
| H  | -2.60288400  | 4.03366700  | 5.75754800 |
| Cs | -2.10398400  | -3.37356700 | 1.80799100 |

### TS5-6

E = -1890.24957342 a.u.

0 1

|   |             |             |             |
|---|-------------|-------------|-------------|
| O | -4.86793400 | 0.11282700  | 1.43862300  |
| C | -3.70262700 | 0.13999100  | 0.65999600  |
| C | -2.81515300 | 1.29399200  | 0.92256700  |
| C | -1.42224700 | 1.17787200  | 0.82583200  |
| C | -3.35814400 | 2.53042700  | 1.30195000  |
| C | -0.59585600 | 2.26674100  | 1.09599500  |
| H | -0.98228000 | 0.22151700  | 0.55316700  |
| C | -2.53343700 | 3.61418700  | 1.58105500  |
| H | -4.43638100 | 2.63243500  | 1.38436900  |
| C | -1.14694400 | 3.48776700  | 1.48083500  |
| H | 0.48183000  | 2.15551600  | 1.01769100  |
| H | -2.97432400 | 4.56096600  | 1.87989100  |
| H | -0.50256600 | 4.33312500  | 1.70275700  |
| C | -3.48605000 | -0.75913500 | -0.32257200 |
| H | -2.60168800 | -0.53659000 | -0.91495300 |
| C | -4.20569700 | -1.94006800 | -0.76414100 |
| C | -5.40847300 | -2.54403600 | -0.12922400 |
| C | -6.57891900 | -1.81267300 | 0.10608000  |
| C | -5.38791500 | -3.90924000 | 0.20182300  |

|    |              |             |             |
|----|--------------|-------------|-------------|
| C  | -7.69036800  | -2.42015100 | 0.68627400  |
| H  | -6.61535900  | -0.76204500 | -0.16740100 |
| C  | -6.50145100  | -4.51243100 | 0.78344200  |
| H  | -4.49411600  | -4.48514700 | -0.04281700 |
| C  | -7.65400500  | -3.76885800 | 1.03626700  |
| H  | -8.58800400  | -1.83519100 | 0.86963100  |
| H  | -6.47166900  | -5.57078700 | 1.02864800  |
| H  | -8.52224400  | -4.23755500 | 1.49149100  |
| C  | -3.62892100  | -2.64032100 | -1.77513000 |
| F  | -4.22229600  | -3.61015200 | -2.41627800 |
| F  | -2.40024200  | -4.18560000 | -0.78817000 |
| F  | -2.57727400  | -2.21852000 | -2.43793000 |
| P  | -4.84185300  | -0.38978400 | 2.98582400  |
| O  | -4.04753200  | -1.63072200 | 3.23877300  |
| C  | -6.60652600  | -0.54328100 | 3.28586400  |
| C  | -7.52947000  | 0.35387000  | 2.73554600  |
| C  | -7.04480500  | -1.61183700 | 4.06901200  |
| C  | -8.88777700  | 0.18984000  | 2.98864000  |
| H  | -7.18645000  | 1.15852500  | 2.08971400  |
| C  | -8.40774300  | -1.77896200 | 4.31041000  |
| H  | -6.31994300  | -2.32026400 | 4.46026900  |
| C  | -9.32585500  | -0.87739900 | 3.77594900  |
| H  | -9.60607900  | 0.88225600  | 2.55999900  |
| H  | -8.75208500  | -2.61767300 | 4.90762000  |
| H  | -10.38734000 | -1.00954200 | 3.96398100  |
| C  | -4.18868200  | 0.99608200  | 3.95160100  |
| C  | -4.97539000  | 2.08855400  | 4.32568700  |
| C  | -2.82229000  | 0.98950000  | 4.25149600  |
| C  | -4.39346100  | 3.17678700  | 4.97368600  |
| H  | -6.04188700  | 2.09412900  | 4.11775100  |
| C  | -2.24132400  | 2.08030400  | 4.89057100  |
| H  | -2.21854400  | 0.13213600  | 3.96728100  |
| C  | -3.02657900  | 3.17682500  | 5.24722000  |
| H  | -5.00795500  | 4.02308400  | 5.26571000  |
| H  | -1.17681500  | 2.07854200  | 5.10426800  |
| H  | -2.57341900  | 4.02965200  | 5.74413800  |
| Cs | -2.13136600  | -3.39853300 | 1.81873700  |

## I5

E = -1890.26950345 a.u.

0 1

|   |             |            |            |
|---|-------------|------------|------------|
| O | -4.84207200 | 0.03718300 | 1.56222100 |
| C | -3.64578600 | 0.04045000 | 0.79873400 |
| C | -2.84159200 | 1.25946200 | 0.94979800 |



|   |              |             |             |
|---|--------------|-------------|-------------|
| C | -1.45272600  | 1.26631400  | 0.72281800  |
| C | -3.43565300  | 2.46875400  | 1.35733300  |
| C | -0.69904000  | 2.42398000  | 0.89085800  |
| H | -0.95385700  | 0.34377300  | 0.43517500  |
| C | -2.67897800  | 3.62057700  | 1.53966900  |
| H | -4.50623800  | 2.49610000  | 1.53701200  |
| C | -1.30271700  | 3.61050100  | 1.30874400  |
| H | 0.37222900   | 2.39362000  | 0.70989000  |
| H | -3.17019400  | 4.53465300  | 1.86324200  |
| H | -0.71115700  | 4.50938900  | 1.45322400  |
| C | -3.42497300  | -0.89789000 | -0.17928200 |
| H | -2.53518700  | -0.63796200 | -0.74897200 |
| C | -4.03527500  | -2.09431700 | -0.63134900 |
| C | -5.26082900  | -2.73294500 | -0.13966500 |
| C | -6.38084000  | -1.98563400 | 0.28245800  |
| C | -5.38805000  | -4.14203600 | -0.06948700 |
| C | -7.51108800  | -2.59825900 | 0.81445500  |
| H | -6.35918400  | -0.90787200 | 0.17749000  |
| C | -6.53147600  | -4.75345300 | 0.43852900  |
| H | -4.58645700  | -4.77455300 | -0.44551000 |
| C | -7.59760800  | -3.98732900 | 0.90867900  |
| H | -8.34146300  | -1.97864200 | 1.14717900  |
| H | -6.58746000  | -5.83909200 | 0.46331700  |
| H | -8.48505500  | -4.46154700 | 1.31676900  |
| C | -3.26436700  | -2.84988300 | -1.63042000 |
| F | -4.00918000  | -3.52483500 | -2.52779600 |
| F | -2.44761900  | -3.87578000 | -1.07656200 |
| F | -2.37621400  | -2.11901700 | -2.33345200 |
| P | -4.87545400  | -0.40769500 | 3.11053300  |
| O | -4.19043600  | -1.69817800 | 3.44855100  |
| C | -6.65637100  | -0.43731300 | 3.37520700  |
| C | -7.51040300  | 0.44842800  | 2.70821400  |
| C | -7.18031500  | -1.39892500 | 4.24089400  |
| C | -8.88492500  | 0.37505400  | 2.91779900  |
| H | -7.09919700  | 1.17290700  | 2.00986900  |
| C | -8.55755900  | -1.47335000 | 4.44371200  |
| H | -6.50860300  | -2.09887800 | 4.73016500  |
| C | -9.40759000  | -0.58661000 | 3.78468400  |
| H | -9.54910100  | 1.05749500  | 2.39610800  |
| H | -8.96705700  | -2.22852700 | 5.10766100  |
| H | -10.48079000 | -0.64828600 | 3.93975400  |
| C | -4.15541900  | 0.96039800  | 4.05053600  |
| C | -4.91567300  | 2.04730600  | 4.48829000  |
| C | -2.76976700  | 0.95842000  | 4.24517700  |

|    |             |             |            |
|----|-------------|-------------|------------|
| C  | -4.29044000 | 3.13390800  | 5.09861000 |
| H  | -5.99410700 | 2.05175400  | 4.35239900 |
| C  | -2.14635000 | 2.04799700  | 4.84377900 |
| H  | -2.18211600 | 0.11139900  | 3.90157000 |
| C  | -2.90709700 | 3.13861500  | 5.26654400 |
| H  | -4.88396100 | 3.97723300  | 5.43884600 |
| H  | -1.06780100 | 2.05378800  | 4.96815700 |
| H  | -2.42010200 | 3.99250400  | 5.72844200 |
| Cs | -2.61118600 | -3.63220200 | 1.97891400 |

### Characterization data for products

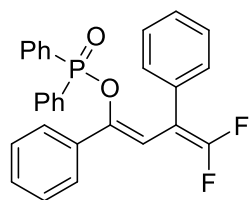

#### **(Z)-4,4-Difluoro-1,3-diphenylbuta-1,3-dien-1-yl diphenylphosphinate (3aa):**

Yield = 62% (84.6 mg). White solid. M.p. 84.7–85.3 °C.

Purified by flash silica gel column chromatography (petroleum ether/ethyl acetate, 10/1~6/1).

**<sup>1</sup>H NMR (400 MHz, CDCl<sub>3</sub>):**  $\delta$  = 7.55-7.48 (m, 5H), 7.47-7.40 (m, 3H), 7.34-7.28 (m, 5H), 7.27-7.22 (m, 7H), 6.01-5.94 (m, 1H) ppm.

**<sup>19</sup>F NMR (376 MHz, CDCl<sub>3</sub>):**  $\delta$  = -79.49 (d, *J* = 19.4 Hz, 1F), -87.05 (d, *J* = 19.4 Hz, 1F) ppm.

**<sup>31</sup>P NMR (162 MHz, CDCl<sub>3</sub>):**  $\delta$  = 31.20 ppm.

**<sup>13</sup>C NMR (100 MHz, CDCl<sub>3</sub>):**  $\delta$  = 153.4 (t, *J* = 293.6 Hz), 149.8-148.6 (m), 135.6, 132.2 (t, *J* = 4.2 Hz), 132.1 (d, *J* = 1.6 Hz), 131.5 (d, *J* = 10.6 Hz), 130.6 (d, *J* = 137.3 Hz), 128.8, 128.6 (t, *J* = 4.1 Hz), 128.1, 128.1, 128.0 (d, *J* = 5.3 Hz), 127.1, 126.5, 107.9-107.5 (m), 90.2 (t, *J* = 19.5 Hz) ppm.

**HRMS (m/z):** calcd for C<sub>28</sub>H<sub>22</sub>F<sub>2</sub>O<sub>2</sub>P [M+H]<sup>+</sup> 459.1320, found: 459.1315.

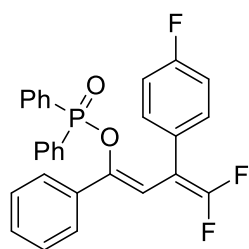

#### **(Z)-4,4-Difluoro-3-(4-fluorophenyl)-1-phenylbuta-1,3-dien-1-yl diphenylphosphinate (3ba):**

Yield = 57% (81.3 mg). White solid. M.p. 114.5–116.1 °C.

Purified by flash silica gel column chromatography (petroleum ether/ethyl acetate, 10/1~6/1).

**<sup>1</sup>H NMR (400 MHz, CDCl<sub>3</sub>):**  $\delta$  = 7.58-7.49 (m, 4H), 7.48-7.39 (m, 4H), 7.34-7.26 (m, 4H), 7.24-7.16 (m, 5H), 6.95-6.86 (m, 2H), 6.00 (q, *J* = 2.9 Hz, 1H) ppm.

**<sup>19</sup>F NMR (376 MHz, CDCl<sub>3</sub>):**  $\delta$  = -80.31 (d, *J* = 20.9 Hz, 1F), -87.55 (d, *J* = 20.9 Hz, 1F), -114.44 (s, 1F) ppm.

**<sup>31</sup>P NMR (162 MHz, CDCl<sub>3</sub>):**  $\delta$  = 30.94 ppm.

**<sup>13</sup>C NMR (100 MHz, CDCl<sub>3</sub>):**  $\delta$  = 161.7 (d, *J* = 246.6 Hz), 153.4 (t, *J* = 293.7 Hz), 149.3-148.8 (m), 135.4, 132.1 (d, *J* = 2.8 Hz), 131.3 (d, *J* = 10.4 Hz), 131.3, 130.6-130.3 (m), 130.0, 128.8, 128.1, 128.0 (d, *J* = 2.0 Hz), 126.4, 114.9 (d, *J* = 21.7 Hz), 107.9-107.6 (m), 89.8 (t, *J* = 19.7 Hz) ppm.

**HRMS (m/z):** calcd for C<sub>28</sub>H<sub>21</sub>F<sub>3</sub>O<sub>2</sub>P [M+H]<sup>+</sup> 477.1226, found: 477.1223.

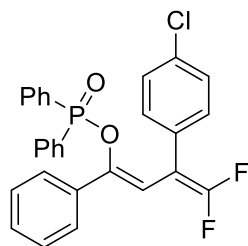

**(Z)-3-(4-Chlorophenyl)-4,4-difluoro-1-phenylbuta-1,3-dien-1-yl diphenylphosphinate (3ca):**

Yield = 44% (64.4 mg). White solid. M.p. 105.1–106.5 °C.

Purified by flash silica gel column chromatography (petroleum ether/ethyl acetate, 10/1~6/1).

**<sup>1</sup>H NMR (400 MHz, CDCl<sub>3</sub>):**  $\delta$  = 7.52-7.47 (m, 3H), 7.47-7.40 (m, 5H), 7.33-7.27 (m, 4H), 7.24-7.15 (m, 7H), 6.01 (q,  $J$  = 2.8 Hz, 1H) ppm.

**<sup>19</sup>F NMR (376 MHz, CDCl<sub>3</sub>):**  $\delta$  = -79.53 (d,  $J$  = 18.0 Hz, 1F), -86.80 (d,  $J$  = 17.9 Hz, 1F) ppm.

**<sup>31</sup>P NMR (162 MHz, CDCl<sub>3</sub>):**  $\delta$  = 31.11 ppm.

**<sup>13</sup>C NMR (100 MHz, CDCl<sub>3</sub>):**  $\delta$  = 153.5 (t,  $J$  = 295.4 Hz), 149.4-148.9 (m), 135.4, 132.9, 132.1 (d,  $J$  = 2.9 Hz), 131.3 (d,  $J$  = 10.6 Hz), 130.7 (t,  $J$  = 4.3 Hz), 130.5 (d,  $J$  = 136.6 Hz), 130.1 (t,  $J$  = 3.9 Hz), 129.8, 128.2, 128.1, 128.0 (d,  $J$  = 2.9 Hz), 126.3, 107.8-107.0 (m), 89.9 (t,  $J$  = 20.0 Hz) ppm.

**HRMS (m/z):** calcd for C<sub>28</sub>H<sub>21</sub>ClF<sub>2</sub>O<sub>2</sub>P [M+H]<sup>+</sup> 493.0930, found: 493.0926.

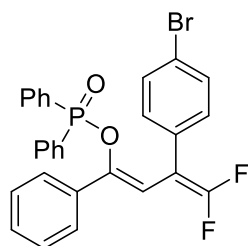

**(Z)-3-(4-Bromophenyl)-4,4-difluoro-1-phenylbuta-1,3-dien-1-yl diphenylphosphinate (3da):**

Yield = 50% (81.2 mg). White solid. M.p. 103.6–105.2 °C.

Purified by flash silica gel column chromatography (petroleum ether/ethyl acetate, 10/1~6/1).

**<sup>1</sup>H NMR (400 MHz, CDCl<sub>3</sub>):**  $\delta$  = 7.51-7.47 (m, 2H), 7.47-7.41 (m, 6H), 7.36-7.27 (m, 6H), 7.24-7.18 (m, 3H), 7.14-7.08 (m, 2H), 6.02 (q,  $J$  = 2.7 Hz, 1H) ppm.

**<sup>19</sup>F NMR (376 MHz, CDCl<sub>3</sub>):**  $\delta$  = -79.36 (d,  $J$  = 17.9 Hz, 1F), -86.73 (d,  $J$  = 17.9 Hz, 1F) ppm.

**<sup>31</sup>P NMR (162 MHz, CDCl<sub>3</sub>):**  $\delta$  = 31.15 ppm.

**<sup>13</sup>C NMR (100 MHz, CDCl<sub>3</sub>):**  $\delta$  = 153.5 (t,  $J$  = 296.4 Hz), 149.4-149.0 (m), 135.3, 132.2 (d,  $J$  = 3.4 Hz), 131.3 (d,  $J$  = 10.6 Hz), 131.2, 130.4 (d,  $J$  = 137.2 Hz), 130.4 (t,  $J$  = 3.9 Hz), 128.9, 128.2, 128.0, 128.0, 126.3, 121.1, 107.7-107.0 (m), 90.0 (t,  $J$  = 19.7 Hz) ppm.

**HRMS (m/z):** calcd for C<sub>28</sub>H<sub>21</sub>BrF<sub>2</sub>O<sub>2</sub>P [M+H]<sup>+</sup> 537.0425, found: 537.0428.

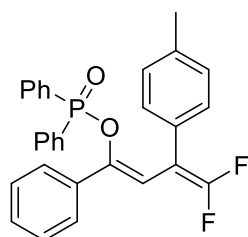

**(Z)-4,4-Difluoro-1-phenyl-3-(*p*-tolyl)buta-1,3-dien-1-yl diphenylphosphinate (3ea):**

Yield = 50% (71.4 mg). Yellow oil.

Purified by flash silica gel column chromatography (petroleum ether/ethyl acetate, 10/1~6/1).

<sup>1</sup>H NMR (400 MHz, CDCl<sub>3</sub>): δ = 7.52-7.47 (m, 5H), 7.47-7.41 (m, 3H), 7.33-7.27 (m, 4H), 7.26-7.21 (m, 3H), 7.16-7.06 (m, 4H), 5.97 (q, *J* = 3.1 Hz, 1H), 2.34 (s, 3H) ppm.

<sup>19</sup>F NMR (376 MHz, CDCl<sub>3</sub>): δ = -80.25 (d, *J* = 20.9 Hz, 1F), -87.64 (d, *J* = 20.9 Hz, 1F) ppm.

<sup>31</sup>P NMR (162 MHz, CDCl<sub>3</sub>): δ = 31.23 ppm.

<sup>13</sup>C NMR (100 MHz, CDCl<sub>3</sub>): δ = 153.4 (t, *J* = 295.2 Hz), 149.6-148.5 (m), 136.9, 135.7, 132.1 (d, *J* = 2.9 Hz), 131.6 (d, *J* = 10.6 Hz), 130.5 (d, *J* = 137.7 Hz), 129.2 (t, *J* = 4.0 Hz), 128.9, 128.8, 128.6 (t, *J* = 3.9 Hz), 128.1 (d, *J* = 4.8 Hz), 128.0, 126.5, 108.2-107.8 (m), 90.2 (t, *J* = 18.8 Hz), 21.2 ppm.

HRMS (*m/z*): calcd for C<sub>29</sub>H<sub>24</sub>F<sub>2</sub>O<sub>2</sub>P [M+H]<sup>+</sup> 473.1476, found: 473.1476.

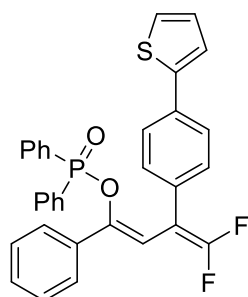

**(Z)-4,4-Difluoro-1-phenyl-3-(4-(thiophen-2-yl)phenyl)buta-1,3-dien-1-yl diphenylphosphinate (3fa):**

Yield = 56% (90.6 mg). Yellow solid. M.p. 136.0–137.1 °C.

Purified by flash silica gel column chromatography (petroleum ether/ethyl acetate, 10/1~6/1).

<sup>1</sup>H NMR (400 MHz, CDCl<sub>3</sub>): δ = 7.53-7.49 (m, 5H), 7.49-7.44 (m, 3H), 7.41-7.35 (m, 2H), 7.32-7.30 (m, 1H), 7.30-7.28 (m, 1H), 7.27-7.22 (m, 9H), 7.09 (dd, *J* = 5.3, 3.4 Hz, 1H), 6.03 (q, *J* = 2.7 Hz, 1H) ppm.

<sup>19</sup>F NMR (376 MHz, CDCl<sub>3</sub>): δ = -79.27 (d, *J* = 18.1 Hz, 1F), -86.60 (d, *J* = 17.9 Hz, 1F) ppm.

<sup>31</sup>P NMR (162 MHz, CDCl<sub>3</sub>): δ = 31.30 ppm.

<sup>13</sup>C NMR (100 MHz, CDCl<sub>3</sub>): δ = 153.6 (t, *J* = 294.2 Hz), 149.5-149.0 (m), 143.8, 135.5, 133.1, 132.1 (d, *J* = 2.9 Hz), 131.4 (d, *J* = 10.6 Hz), 131.3 (t, *J* = 4.4 Hz), 130.5 (d, *J* = 137.3 Hz), 129.1 (t, *J* = 4.1 Hz), 128.9, 128.1 (d, *J* = 13.4 Hz), 128.1, 128.1, 126.4, 125.5, 124.9, 123.1, 107.7-107.2 (m), 90.2 (t, *J* = 19.5 Hz) ppm.

HRMS (*m/z*): calcd for C<sub>32</sub>H<sub>24</sub>F<sub>2</sub>O<sub>2</sub>PS [M+H]<sup>+</sup> 541.1197, found: 541.1197.

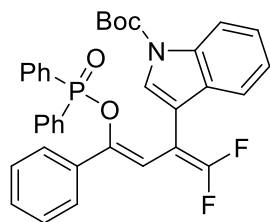

**tert-Butyl (Z)-3-(4-((diphenylphosphoryl)oxy)-1,1-difluoro-4-phenylbuta-1,3-dien-2-yl)-1H-indole-1-carboxylate (3ga):**

Yield = 57% (102.5 mg). Red oil.

Purified by flash silica gel column chromatography (petroleum ether/ethyl acetate, 10/1~6/1).

**<sup>1</sup>H NMR (400 MHz, CDCl<sub>3</sub>):**  $\delta$  = 8.19-8.01 (m, 1H), 7.55 (dd,  $J$  = 7.9, 0.9 Hz, 1H), 7.40-7.32 (m, 6H), 7.32-7.24 (m, 5H), 7.22-7.16 (m, 6H), 7.15-7.12 (m, 1H), 6.22 (q,  $J$  = 2.9 Hz, 1H), 1.63 (s, 9H) ppm.

**<sup>19</sup>F NMR (376 MHz, CDCl<sub>3</sub>):**  $\delta$  = -81.55 (d,  $J$  = 16.4 Hz, 1F), -85.06 (s, 1F) ppm.

**<sup>31</sup>P NMR (162 MHz, CDCl<sub>3</sub>):**  $\delta$  = 30.45 ppm.

**<sup>13</sup>C NMR (100 MHz, CDCl<sub>3</sub>):**  $\delta$  = 154.1 (t,  $J$  = 293.1 Hz), 149.1, 148.4-147.7 (m), 135.6, 135.0, 131.9 (d,  $J$  = 3.4 Hz), 131.1 (d,  $J$  = 10.6 Hz), 130.4 (d,  $J$  = 136.6 Hz), 129.6 (d,  $J$  = 3.4 Hz), 128.6, 128.0 (d,  $J$  = 4.3 Hz), 127.8, 126.3, 125.3, 124.2, 122.7, 120.0, 115.1, 111.5 (t,  $J$  = 3.4 Hz), 107.5 (d,  $J$  = 5.8 Hz), 84.1 (t,  $J$  = 22.1 Hz), 83.5, 28.1 ppm.

**HRMS (m/z):** calcd for C<sub>35</sub>H<sub>31</sub>F<sub>2</sub>NO<sub>4</sub>P [M+H]<sup>+</sup> 598.1953, found: 598.1957.

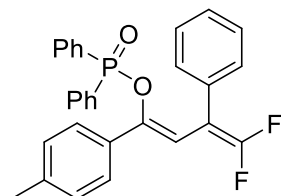

**(Z)-4,4-Difluoro-3-phenyl-1-(p-tolyl)buta-1,3-dien-1-yl diphenylphosphinate (3ha):**

Yield = 39% (54.9 mg). White solid. M.p. 129.6–131.2 °C.

Purified by flash silica gel column chromatography (petroleum ether/ethyl acetate, 10/1~6/1).

**<sup>1</sup>H NMR (400 MHz, CDCl<sub>3</sub>):**  $\delta$  = 7.54-7.46 (m, 4H), 7.45-7.38 (m, 4H), 7.33-7.25 (m, 6H), 7.25-7.19 (m, 3H), 7.11-7.02 (m, 2H), 5.92 (q,  $J$  = 3.3 Hz, 1H), 2.30 (s, 3H) ppm.

**<sup>19</sup>F NMR (376 MHz, CDCl<sub>3</sub>):**  $\delta$  = -79.51 (d,  $J$  = 19.4 Hz, 1F), -87.24 (d,  $J$  = 19.5 Hz, 1F) ppm.

**<sup>31</sup>P NMR (162 MHz, CDCl<sub>3</sub>):**  $\delta$  = 31.10 ppm.

**<sup>13</sup>C NMR (100 MHz, CDCl<sub>3</sub>):**  $\delta$  = 153.4 (t,  $J$  = 294.6 Hz), 149.9-149.1 (m), 138.9, 132.8, 132.3 (t,  $J$  = 4.3 Hz), 132.0 (d,  $J$  = 2.9 Hz), 131.5 (d,  $J$  = 10.6 Hz), 130.6 (d,  $J$  = 137.8 Hz), 128.7, 128.5 (t,  $J$  = 4.1 Hz), 128.1 (d,  $J$  = 2.4 Hz), 127.9, 127.0, 126.4, 106.8-106.5 (m), 90.2 (t,  $J$  = 20.0 Hz), 21.2 ppm.

**HRMS (m/z):** calcd for C<sub>29</sub>H<sub>24</sub>F<sub>2</sub>O<sub>2</sub>P [M+H]<sup>+</sup> 473.1476, found: 473.1477.

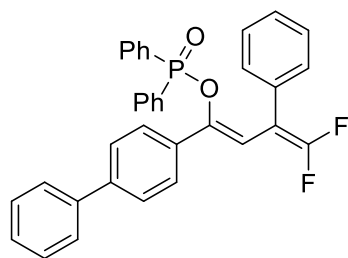

**(Z)-1-([1,1'-Biphenyl]-4-yl)-4,4-difluoro-3-phenylbuta-1,3-dien-1-yl diphenylphosphinate (3ia):**

Yield = 68% (108.4 mg). White solid. M.p. 103.9–104.1 °C.

Purified by flash silica gel column chromatography (petroleum ether/ethyl acetate, 10/1~6/1).

**<sup>1</sup>H NMR (400 MHz, CDCl<sub>3</sub>):**  $\delta$  = 7.62-7.53 (m, 5H), 7.53-7.46 (m, 5H), 7.45-7.38 (m, 4H), 7.35-7.22 (m, 10H), 6.04 (q,  $J$  = 3.0 Hz, 1H) ppm.

**<sup>19</sup>F NMR (376 MHz, CDCl<sub>3</sub>):**  $\delta$  = -79.26 (d,  $J$  = 19.4 Hz, 1F), -86.92 (d,  $J$  = 19.4 Hz, 1F) ppm.

**<sup>31</sup>P NMR (162 MHz, CDCl<sub>3</sub>):**  $\delta$  = 31.49 ppm.

**<sup>13</sup>C NMR (100 MHz, CDCl<sub>3</sub>):**  $\delta$  = 153.4 (t,  $J$  = 295.3 Hz), 149.2-148.7 (m), 141.5, 140.3, 134.5, 132.2 (t,  $J$  = 4.3 Hz), 132.1 (d,  $J$  = 2.9 Hz), 131.5 (d,  $J$  = 10.6 Hz), 130.5 (d,  $J$  = 137.8 Hz), 128.7, 128.6 (t,  $J$  = 3.9 Hz), 128.1, 128.0, 127.4, 127.1, 126.9, 126.8, 126.7, 107.8-107.4 (m), 90.3 (t,  $J$  = 19.5 Hz) ppm.

**HRMS (m/z):** calcd for C<sub>34</sub>H<sub>26</sub>F<sub>2</sub>O<sub>2</sub>P [M+H]<sup>+</sup> 535.1633, found: 535.1630.

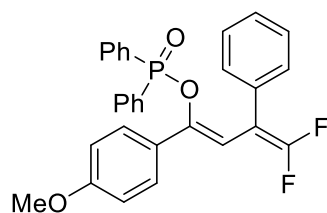

**(Z)-4,4-Difluoro-1-(4-methoxyphenyl)-3-phenylbuta-1,3-dien-1-yl diphenylphosphinate (3ja):**

Yield = 61% (90.0 mg). White solid. M.p. 136.4–136.8 °C.

Purified by flash silica gel column chromatography (petroleum ether/ethyl acetate, 10/1~6/1).

**<sup>1</sup>H NMR (400 MHz, CDCl<sub>3</sub>):**  $\delta$  = 7.53-7.48 (m, 3H), 7.47-7.39 (m, 5H), 7.32-7.25 (m, 6H), 7.25-7.20 (m, 3H), 6.81-6.75 (m, 2H), 5.84 (q,  $J$  = 3.3 Hz, 1H), 3.76 (s, 3H) ppm.

**<sup>19</sup>F NMR (376 MHz, CDCl<sub>3</sub>):**  $\delta$  = -79.69 (d,  $J$  = 20.9 Hz, 1F), -87.41 (d,  $J$  = 20.9 Hz, 1F) ppm.

**<sup>31</sup>P NMR (162 MHz, CDCl<sub>3</sub>):**  $\delta$  = 31.10 ppm.

**<sup>13</sup>C NMR (100 MHz, CDCl<sub>3</sub>):**  $\delta$  = 160.0, 153.3 (t,  $J$  = 294.8 Hz), 149.5-149.0 (m), 132.4 (t,  $J$  = 4.6 Hz), 132.0 (d,  $J$  = 2.9 Hz), 131.4 (d,  $J$  = 10.6 Hz), 130.6 (d,  $J$  = 137.7 Hz), 128.5 (t,  $J$  = 4.1 Hz), 128.1, 128.1, 128.0, 127.9, 127.0, 113.4, 106.2-105.4 (m), 90.1 (t,  $J$  = 19.6 Hz), 55.1 ppm.

**HRMS (m/z):** calcd for C<sub>29</sub>H<sub>24</sub>F<sub>2</sub>O<sub>3</sub>P [M+H]<sup>+</sup> 489.1426, found: 489.1428.

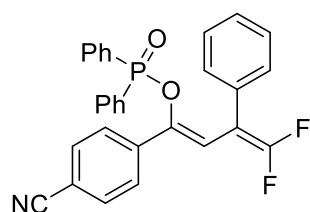

**(Z)-1-(4-Cyanophenyl)-4,4-difluoro-3-phenylbuta-1,3-dien-1-yl diphenylphosphinate (3ka):**

Yield = 61% (89.0 mg). White solid. M.p. 151.4–152.7 °C.

Purified by flash silica gel column chromatography (petroleum ether/ethyl acetate, 10/1~4/1).

**<sup>1</sup>H NMR (400 MHz, CDCl<sub>3</sub>):** δ = 7.65-7.58 (m, 2H), 7.56-7.52 (m, 2H), 7.51-7.42 (m, 6H), 7.36-7.25 (m, 7H), 7.21-7.16 (m, 2H), 6.14 (q, *J* = 3.0 Hz, 1H) ppm.

**<sup>19</sup>F NMR (376 MHz, CDCl<sub>3</sub>):** δ = -78.47 (d, *J* = 16.4 Hz, 1F), -85.84 (d, *J* = 16.4 Hz, 1F) ppm.

**<sup>31</sup>P NMR (162 MHz, CDCl<sub>3</sub>):** δ = 32.56 ppm.

**<sup>13</sup>C NMR (100 MHz, CDCl<sub>3</sub>):** δ = 153.6 (t, *J* = 294.8 Hz), 147.3-146.9 (m), 140.0, 132.4 (d, *J* = 2.9 Hz), 131.9, 131.6 (t, *J* = 4.2 Hz), 131.4 (d, *J* = 10.6 Hz), 130.0 (d, *J* = 137.3 Hz), 128.6 (t, *J* = 3.9 Hz), 128.3 (d, *J* = 5.8 Hz), 128.2, 127.4, 126.8, 118.5, 112.1, 111.2-110.3 (m), 90.2 (t, *J* = 19.1 Hz) ppm.

**HRMS (m/z):** calcd for C<sub>29</sub>H<sub>21</sub>F<sub>2</sub>NO<sub>2</sub>P [M+H]<sup>+</sup> 484.1272, found: 484.1277.

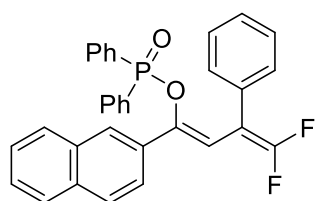

**(Z)-4,4-Difluoro-1-(naphthalen-2-yl)-3-phenylbuta-1,3-dien-1-yl diphenylphosphinate (3la):**

Yield = 56% (85.9 mg). White solid. M.p. 161.8–162.9 °C.

Purified by flash silica gel column chromatography (petroleum ether/ethyl acetate, 10/1~6/1).

**<sup>1</sup>H NMR (400 MHz, CDCl<sub>3</sub>):** δ = 7.92 (d, *J* = 2.2 Hz, 1H), 7.81-7.76 (m, 1H), 7.75-7.70 (m, 1H), 7.69-7.65 (m, 1H), 7.64-7.60 (m, 1H), 7.59-7.51 (m, 4H), 7.49-7.41 (m, 4H), 7.35-7.27 (m, 9H), 6.15 (q, *J* = 3.0 Hz, 1H) ppm.

**<sup>19</sup>F NMR (376 MHz, CDCl<sub>3</sub>):** δ = -79.27 (d, *J* = 19.4 Hz, 1F), -86.98 (d, *J* = 19.4 Hz, 1F) ppm.

**<sup>31</sup>P NMR (162 MHz, CDCl<sub>3</sub>):** δ = 31.27 ppm.

**<sup>13</sup>C NMR (100 MHz, CDCl<sub>3</sub>):** δ = 153.5 (t, *J* = 295.7 Hz), 149.5-149.0 (m), 133.3, 132.9, 132.7, 132.3 (t, *J* = 4.2 Hz), 132.1 (d, *J* = 3.4 Hz), 131.5 (d, *J* = 10.6 Hz), 130.8 (d, *J* = 137.3 Hz), 128.7 (t, *J* = 3.9 Hz), 128.5, 128.2, 128.1, 127.8, 127.5, 127.2, 126.6, 126.3, 126.2, 123.8, 109.0-107.7 (m), 90.5 (t, *J* = 19.4 Hz) ppm.

**HRMS (m/z):** calcd for C<sub>32</sub>H<sub>24</sub>F<sub>2</sub>O<sub>2</sub>P [M+H]<sup>+</sup> 509.1476, found: 509.1474.

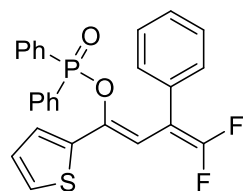

**(Z)-4,4-Difluoro-3-phenyl-1-(thiophen-2-yl)buta-1,3-dien-1-yl diphenylphosphinate (3ma):**

Yield = 61% (84.9 mg). Yellow solid. M.p. 128.2–130.1 °C.

Purified by flash silica gel column chromatography (petroleum ether/ethyl acetate, 10/1~6/1).

**<sup>1</sup>H NMR (400 MHz, CDCl<sub>3</sub>):** δ = 7.60-7.51 (m, 4H), 7.48-7.42 (m, 2H), 7.36-7.29 (m, 4H), 7.29-7.26 (m, 2H), 7.25-7.22 (m, 2H), 7.22-7.16 (m, 3H), 6.90 (dd, *J* = 5.1, 3.7 Hz, 1H), 5.98 (q, *J* = 2.7 Hz, 1H) ppm.

**<sup>19</sup>F NMR (376 MHz, CDCl<sub>3</sub>):** δ = -78.51 (d, *J* = 17.2 Hz, 1F), -86.48 (d, *J* = 17.5 Hz, 1F) ppm.



**<sup>31</sup>P NMR (162 MHz, CDCl<sub>3</sub>):**  $\delta$  = 31.94 ppm.

**<sup>13</sup>C NMR (100 MHz, CDCl<sub>3</sub>):**  $\delta$  = 153.4 (t,  $J$  = 295.0 Hz), 144.0-143.5 (m), 138.8, 132.2 (d,  $J$  = 2.5 Hz), 132.0 (t,  $J$  = 4.0 Hz), 131.5 (d,  $J$  = 10.6 Hz), 130.4 (d,  $J$  = 137.8 Hz), 128.6 (t,  $J$  = 3.9 Hz), 128.2, 128.1 (d,  $J$  = 2.9 Hz), 127.5, 127.4, 127.2, 126.1, 107.1-106.1 (m), 90.2 (t,  $J$  = 19.5 Hz) ppm.

**HRMS (m/z):** calcd for C<sub>26</sub>H<sub>20</sub>F<sub>2</sub>O<sub>2</sub>PS [M+H]<sup>+</sup> 465.0884, found: 465.0882.

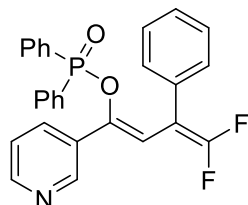

**(Z)-4,4-Difluoro-3-phenyl-1-(pyridin-3-yl)buta-1,3-dien-1-yl diphenylphosphinate (3na):**

Yield = 43% (59.9 mg). Yellow solid. M.p. 80.1–82.0 °C.

Purified by flash silica gel column chromatography (petroleum ether/ethyl acetate, 6/1~1/1).

**<sup>1</sup>H NMR (400 MHz, CDCl<sub>3</sub>):**  $\delta$  = 8.68 (d,  $J$  = 2.4 Hz, 1H), 8.50 (dd,  $J$  = 4.8, 1.6 Hz, 1H), 7.90-7.85 (m, 1H), 7.54-7.42 (m, 6H), 7.36-7.26 (m, 7H), 7.25-7.18 (m, 3H), 6.04 (q,  $J$  = 3.1 Hz, 1H) ppm.

**<sup>19</sup>F NMR (376 MHz, CDCl<sub>3</sub>):**  $\delta$  = -78.89 (d,  $J$  = 17.9 Hz, 1F), -86.33 (d,  $J$  = 17.9 Hz, 1F) ppm.

**<sup>31</sup>P NMR (162 MHz, CDCl<sub>3</sub>):**  $\delta$  = 32.29 ppm.

**<sup>13</sup>C NMR (100 MHz, CDCl<sub>3</sub>):**  $\delta$  = 153.7 (t,  $J$  = 295.1 Hz), 149.4, 147.1, 146.6-146.1 (m), 134.4, 132.4 (d,  $J$  = 3.4 Hz), 131.9, 131.8 (t,  $J$  = 3.5 Hz), 131.5 (d,  $J$  = 10.6 Hz), 130.1 (d,  $J$  = 137.3 Hz), 128.6 (t,  $J$  = 3.9 Hz), 128.3 (d,  $J$  = 6.3 Hz), 128.2, 127.4, 122.9, 109.9-109.4 (m), 90.1 (t,  $J$  = 19.4 Hz) ppm.

**HRMS (m/z):** calcd for C<sub>27</sub>H<sub>21</sub>F<sub>2</sub>NO<sub>2</sub>P [M+H]<sup>+</sup> 460.1272, found: 460.1270.

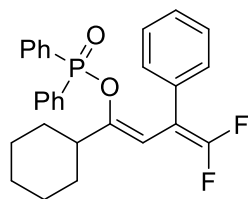

**(Z)-1-Cyclohexyl-4,4-difluoro-3-phenylbuta-1,3-dien-1-yl diphenylphosphinate (3oa):**

Yield = 51% (71.4 mg). Yellow oil.

Purified by flash silica gel column chromatography (petroleum ether/ethyl acetate, 10/1~6/1).

**<sup>1</sup>H NMR (400 MHz, CDCl<sub>3</sub>):**  $\delta$  = 7.55-7.48 (m, 4H), 7.47-7.42 (m, 2H), 7.35-7.29 (m, 4H), 7.27-7.22 (m, 3H), 7.20-7.15 (m, 2H), 5.26 (q,  $J$  = 2.7 Hz, 1H), 2.59-2.47 (m, 1H), 2.11-1.99 (m, 2H), 1.78-1.62 (m, 3H), 1.28-1.13 (m, 5H) ppm.

**<sup>19</sup>F NMR (376 MHz, CDCl<sub>3</sub>):**  $\delta$  = -80.78 (d,  $J$  = 22.4 Hz, 1F), -88.59 (d,  $J$  = 22.8 Hz, 1F) ppm.

**<sup>31</sup>P NMR (162 MHz, CDCl<sub>3</sub>):**  $\delta$  = 29.64 ppm.

**<sup>13</sup>C NMR (100 MHz, CDCl<sub>3</sub>):**  $\delta$  = 157.8-157.2 (m), 153.2 (t,  $J$  = 293.6 Hz), 132.7 (t,  $J$  = 4.1 Hz), 132.1 (d,  $J$  = 2.9 Hz), 131.4 (d,  $J$  = 10.6 Hz), 131.1 (d,  $J$  = 137.9 Hz), 128.3 (t,  $J$  = 3.8 Hz), 128.2, 128.1 (d,  $J$  = 3.4 Hz), 126.9, 103.3-102.8 (m), 89.6 (t,  $J$  = 18.5 Hz), 43.4, 31.4, 26.1, 25.9 ppm.

**HRMS (m/z):** calcd for C<sub>28</sub>H<sub>28</sub>F<sub>2</sub>O<sub>2</sub>P [M+H]<sup>+</sup> 465.1789, found: 465.1788.

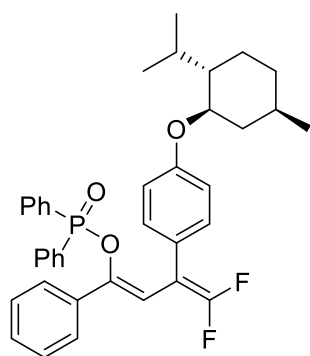

**(Z)-4,4-Difluoro-3-(4-(((1R,2S,5R)-2-isopropyl-5-methylcyclohexyl)oxy)phenyl)-1-phenylbuta-1,3-dien-1-yl diphenylphosphinate (3pa):**

Yield = 57% (104.3 mg). Yellow oil.

Purified by flash silica gel column chromatography (petroleum ether/ethyl acetate, 10/1~6/1).

**<sup>1</sup>H NMR (400 MHz, CDCl<sub>3</sub>):**  $\delta$  = 7.60-7.52 (m, 6H), 7.48-7.41 (m, 2H), 7.36-7.27 (m, 7H), 7.19-7.13 (m, 2H), 6.89-6.82 (m, 2H), 5.95 (dt,  $J$  = 4.0, 2.5 Hz, 1H), 4.67 (q,  $J$  = 2.7 Hz, 1H), 2.18-2.08 (m, 1H), 1.87-1.69 (m, 4H), 1.68-1.56 (m, 1H), 1.14-1.00 (m, 3H), 0.98 (d,  $J$  = 6.7 Hz, 3H), 0.91 (d,  $J$  = 6.6 Hz, 3H), 0.87 (d,  $J$  = 6.5 Hz, 3H) ppm.

**<sup>19</sup>F NMR (376 MHz, CDCl<sub>3</sub>):**  $\delta$  = -80.76 (d,  $J$  = 19.8 Hz, 1F), -88.13 (d,  $J$  = 19.4 Hz, 1F) ppm.

**<sup>31</sup>P NMR (162 MHz, CDCl<sub>3</sub>):**  $\delta$  = 31.16 ppm.

**<sup>13</sup>C NMR (100 MHz, CDCl<sub>3</sub>):**  $\delta$  = 157.4, 153.1 (t,  $J$  = 293.5 Hz), 149.4-149.1 (m), 135.7, 132.1 (d,  $J$  = 2.9 Hz), 131.6 (d,  $J$  = 10.6 Hz), 130.7 (d,  $J$  = 137.8 Hz), 129.7 (t,  $J$  = 4.1 Hz), 128.8, 128.1 (d,  $J$  = 5.3 Hz), 128.0, 126.5, 123.8 (t,  $J$  = 4.3 Hz), 115.1, 108.0, 89.6 (t,  $J$  = 19.7 Hz), 73.0, 47.7, 37.5, 34.9, 29.2, 26.2, 24.7, 22.2, 21.0, 20.9 ppm.

**HRMS (m/z):** calcd for C<sub>38</sub>H<sub>40</sub>F<sub>2</sub>O<sub>3</sub>P [M+H]<sup>+</sup> 613.2678, found: 613.2684.

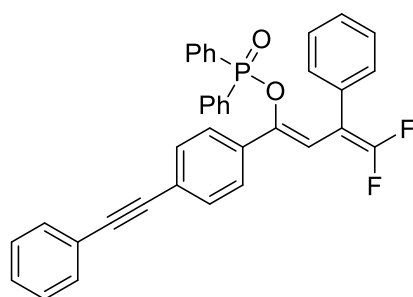

**(Z)-4,4-Difluoro-3-phenyl-1-(4-(phenylethynyl)phenyl)buta-1,3-dien-1-yl diphenylphosphinate (3qa):**

Yield = 58% (97.6 mg). White solid. M.p. 167.9–169.1 °C.

Purified by flash silica gel column chromatography (petroleum ether/ethyl acetate, 10/1~6/1).

**<sup>1</sup>H NMR (400 MHz, CDCl<sub>3</sub>):**  $\delta$  = 7.54-7.51 (m, 4H), 7.51-7.47 (m, 4H), 7.47-7.38 (m, 4H), 7.36-7.28 (m, 8H), 7.28-7.21 (m, 4H), 6.04 (q,  $J$  = 3.3 Hz, 1H) ppm.

**<sup>19</sup>F NMR (376 MHz, CDCl<sub>3</sub>):**  $\delta$  = -79.11 (d,  $J$  = 19.4 Hz, 1F), -86.69 (d,  $J$  = 19.9 Hz, 1F) ppm.

**<sup>31</sup>P NMR (162 MHz, CDCl<sub>3</sub>):**  $\delta$  = 31.58 ppm.

**<sup>13</sup>C NMR (100 MHz, CDCl<sub>3</sub>):**  $\delta$  = 153.5 (t,  $J$  = 295.2 Hz), 148.8-148.3 (m), 135.4, 132.2 (d,  $J$  = 2.9 Hz), 132.2 (t,  $J$  = 4.1 Hz), 131.6, 131.5, 131.3, 130.5 (d,  $J$  = 137.3 Hz), 128.7 (t,  $J$  = 3.9 Hz),

128.4, 128.3, 128.2 (d,  $J = 4.3$  Hz), 128.1, 127.2, 126.4, 123.7, 123.1, 108.8-108.2 (m), 90.7, 90.4 (t,  $J = 19.9$  Hz), 89.1 ppm.

**HRMS (m/z):** calcd for  $C_{36}H_{26}F_2O_2P$   $[M+H]^+$  559.1633, found: 559.1632.

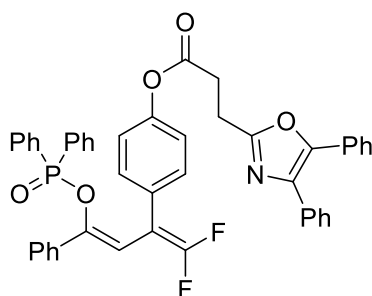

**(Z)-4-(4-((Diphenylphosphoryl)oxy)-1,1-difluoro-4-phenylbuta-1,3-dien-2-yl)phenyl 3-(4,5-diphenyloxazol-2-yl)propanoate (3ra):**

Yield = 58% (131.5 mg). Yellow oil.

Purified by flash silica gel column chromatography (petroleum ether/ethyl acetate, 6/1~3/1).

**$^1H$  NMR (400 MHz,  $CDCl_3$ ):**  $\delta = 7.69$ – $7.63$  (m, 2H),  $7.62$ – $7.57$  (m, 2H),  $7.56$ – $7.48$  (m, 6H),  $7.45$ – $7.37$  (m, 4H),  $7.36$ – $7.27$  (m, 9H),  $7.27$ – $7.24$  (m, 2H),  $7.22$ – $7.18$  (m, 2H),  $7.04$ – $6.98$  (m, 2H),  $6.01$ – $5.94$  (m, 1H),  $3.33$  (t,  $J = 7.5$  Hz, 2H),  $3.20$  (t,  $J = 7.1$  Hz, 2H) ppm.

**$^{19}F$  NMR (376 MHz,  $CDCl_3$ ):**  $\delta = -79.16$  (d,  $J = 19.4$  Hz, 1F),  $-86.67$  (d,  $J = 19.4$  Hz, 1F) ppm.

**$^{31}P$  NMR (162 MHz,  $CDCl_3$ ):**  $\delta = 31.42$  ppm.

**$^{13}C$  NMR (100 MHz,  $CDCl_3$ ):**  $\delta = 170.5$ ,  $161.4$ ,  $150.4$  (t,  $J = 293.4$  Hz),  $149.5$ ,  $149.5$ – $149.3$  (m),  $145.5$ ,  $135.5$ ,  $135.1$ ,  $132.2$  (d,  $J = 2.9$  Hz),  $131.7$  (d,  $J = 108.4$  Hz),  $131.4$  (d,  $J = 10.6$  Hz),  $130.0$  (t,  $J = 4.4$  Hz),  $129.8$ ,  $129.6$  (t,  $J = 3.8$  Hz),  $128.9$ ,  $128.8$ ,  $128.6$ ,  $128.5$ ,  $128.5$ ,  $128.2$ ,  $128.1$ ,  $128.1$ ,  $127.8$ ,  $126.4$ ,  $126.4$ ,  $121.2$ ,  $107.9$ – $106.5$  (m),  $89.6$  (t,  $J = 20.2$  Hz),  $31.1$ ,  $23.4$  ppm.

**HRMS (m/z):** calcd for  $C_{46}H_{35}F_2NO_5P$   $[M+H]^+$  750.2215, found: 750.2220.

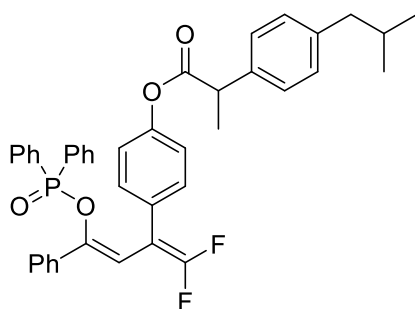

**(Z)-4-(4-((Diphenylphosphoryl)oxy)-1,1-difluoro-4-phenylbuta-1,3-dien-2-yl)phenyl 2-(4-isobutylphenyl)propanoate (3sa):**

Yield = 67% (134.0 mg). Yellow oil.

Purified by flash silica gel column chromatography (petroleum ether/ethyl acetate, 10/1~6/1).

**$^1H$  NMR (400 MHz,  $CDCl_3$ ):**  $\delta = 7.54$ – $7.45$  (m, 6H),  $7.43$ – $7.37$  (m, 2H),  $7.36$ – $7.32$  (m, 2H),  $7.31$ – $7.23$  (m, 7H),  $7.20$ – $7.16$  (m, 4H),  $6.94$ – $6.88$  (m, 2H),  $5.97$  (q,  $J = 3.4$  Hz, 1H),  $3.96$  (q,  $J = 7.1$  Hz, 1H),  $2.49$  (d,  $J = 7.1$  Hz, 2H),  $1.95$ – $1.82$  (m, 1H),  $1.63$  (d,  $J = 7.1$  Hz, 3H),  $0.92$  (d,  $J = 6.6$  Hz, 6H) ppm.

**$^{19}F$  NMR (376 MHz,  $CDCl_3$ ):**  $\delta = -79.45$  (d,  $J = 19.4$  Hz, 1F),  $-86.87$  (d,  $J = 19.4$  Hz, 1F) ppm.

**<sup>31</sup>P NMR (162 MHz, CDCl<sub>3</sub>):**  $\delta$  = 31.33 ppm.

**<sup>13</sup>C NMR (100 MHz, CDCl<sub>3</sub>):**  $\delta$  = 173.0, 153.4 (t,  $J$  = 297.7 Hz), 149.8, 149.6–149.1 (m), 140.8, 137.2, 135.5, 132.6 (d,  $J$  = 2.9 Hz), 131.4 (d,  $J$  = 10.1 Hz), 130.5 (d,  $J$  = 137.7 Hz), 129.7 (t,  $J$  = 4.2 Hz), 129.6, 129.5, 129.5, 128.9, 128.1 (d,  $J$  = 2.5 Hz), 127.2, 126.4, 121.0, 107.6, 89.7 (t,  $J$  = 19.7 Hz), 45.2, 45.0, 30.2, 22.4, 18.5 ppm.

**HRMS (m/z):** calcd for C<sub>41</sub>H<sub>38</sub>F<sub>2</sub>O<sub>4</sub>P [M+H]<sup>+</sup> 663.2470, found: 663.2471.

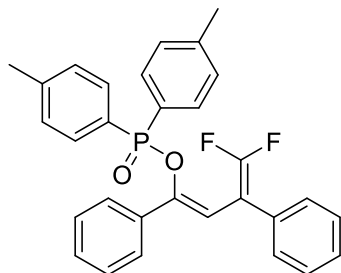

**(Z)-4,4-Difluoro-1,3-diphenylbuta-1,3-dien-1-yl di-*p*-tolylphosphinate (3ab):**

Yield = 57% (83.0 mg). Yellow oil.

Purified by flash silica gel column chromatography (petroleum ether/ethyl acetate, 10/1~6/1).

**<sup>1</sup>H NMR (400 MHz, CDCl<sub>3</sub>):**  $\delta$  = 7.59-7.53 (m, 2H), 7.45-7.37 (m, 4H), 7.33-7.27 (m, 6H), 7.25-7.21 (m, 2H), 7.14-7.08 (m, 4H), 6.00-5.93 (m, 1H), 2.33 (s, 6H) ppm.

**<sup>19</sup>F NMR (376 MHz, CDCl<sub>3</sub>):**  $\delta$  = -79.33 (d,  $J$  = 19.4 Hz, 1F), -86.96 (d,  $J$  = 19.6 Hz, 1F) ppm.

**<sup>31</sup>P NMR (162 MHz, CDCl<sub>3</sub>):**  $\delta$  = 32.42 ppm.

**<sup>13</sup>C NMR (100 MHz, CDCl<sub>3</sub>):**  $\delta$  = 153.4 (t,  $J$  = 295.6 Hz), 149.8-149.3 (m), 142.6 (d,  $J$  = 2.9 Hz), 135.8, 132.3 (t,  $J$  = 4.3 Hz), 131.5 (d,  $J$  = 11.1 Hz), 128.8, 128.8, 128.7, 128.5 (t,  $J$  = 4.1 Hz), 128.0 (d,  $J$  = 2.0 Hz), 127.5 (d,  $J$  = 140.3 Hz), 126.8, 126.5, 108.0-106.9 (m), 90.1 (t,  $J$  = 19.5 Hz), 21.5 ppm.

**HRMS (m/z):** calcd for C<sub>30</sub>H<sub>26</sub>F<sub>2</sub>O<sub>2</sub>P [M+H]<sup>+</sup> 487.1633, found: 487.1637.

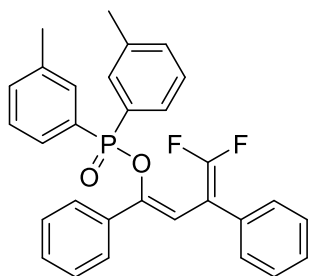

**(Z)-4,4-Difluoro-1,3-diphenylbuta-1,3-dien-1-yl di-*m*-tolylphosphinate (3ac):**

Yield = 62% (90.8 mg). Yellow oil.

Purified by flash silica gel column chromatography (petroleum ether/ethyl acetate, 10/1~6/1).

**<sup>1</sup>H NMR (400 MHz, CDCl<sub>3</sub>):**  $\delta$  = 7.55-7.49 (m, 2H), 7.39 (d,  $J$  = 13.1 Hz, 2H), 7.33-7.25 (m, 7H), 7.24-7.18 (m, 7H), 5.99-5.93 (m, 1H), 2.24 (s, 6H) ppm.

**<sup>19</sup>F NMR (376 MHz, CDCl<sub>3</sub>):**  $\delta$  = -79.34 (d,  $J$  = 19.9 Hz, 1F), -86.89 (d,  $J$  = 19.2 Hz, 1F) ppm.

**<sup>31</sup>P NMR (162 MHz, CDCl<sub>3</sub>):**  $\delta$  = 32.01 ppm.

**<sup>13</sup>C NMR (100 MHz, CDCl<sub>3</sub>):**  $\delta$  = 153.5 (t,  $J$  = 294.5 Hz), 149.6-149.2 (m), 137.9 (d,  $J$  = 13.5 Hz), 135.7, 132.9 (d,  $J$  = 2.9 Hz), 132.3 (t,  $J$  = 4.3 Hz), 131.9 (d,  $J$  = 10.6 Hz), 130.6 (d,  $J$  = 136.8 Hz), 128.8, 128.7, 128.6, 128.5 (t,  $J$  = 3.9 Hz), 128.0, 127.9, 127.1, 126.5, 107.7-107.4 (m), 90.1 (t,

$J = 19.3$  Hz), 21.2 ppm.

**HRMS (m/z):** calcd for  $C_{30}H_{26}F_2O_2P$   $[M+H]^+$  487.1633, found: 487.1637.

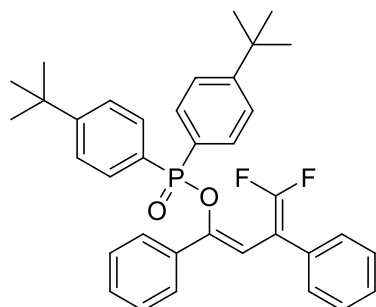

**(Z)-4,4-Difluoro-1,3-diphenylbuta-1,3-dien-1-yl bis(4-(tert-butyl)phenyl)phosphinate (3ae):**

Yield = 35% (60.2 mg). White solid. M.p. 173.4–173.8 °C.

Purified by flash silica gel column chromatography (petroleum ether/ethyl acetate, 10/1~6/1).

**$^1H$  NMR (400 MHz,  $CDCl_3$ ):**  $\delta = 7.55$ -7.50 (m, 2H), 7.49-7.41 (m, 4H), 7.33-7.28 (m, 4H), 7.28-7.20 (m, 8H), 6.00-5.92 (m, 1H), 1.27 (s, 18H) ppm.

**$^{19}F$  NMR (376 MHz,  $CDCl_3$ ):**  $\delta = -79.44$  (d,  $J = 19.4$  Hz, 1F),  $-86.93$  (d,  $J = 19.4$  Hz, 1F) ppm.

**$^{31}P$  NMR (162 MHz,  $CDCl_3$ ):**  $\delta = 32.04$  ppm.

**$^{13}C$  NMR (100 MHz,  $CDCl_3$ ):**  $\delta = 155.4$  (d,  $J = 2.9$  Hz), 153.4 (t,  $J = 294.5$  Hz), 149.5-149.0 (m), 135.9, 132.4 (t,  $J = 4.1$  Hz), 131.4 (d,  $J = 10.6$  Hz), 128.7, 128.6 (t,  $J = 3.7$  Hz), 128.0 (d,  $J = 4.8$  Hz), 127.6 (d,  $J = 139.0$  Hz), 127.0, 126.4, 125.1, 124.9, 107.8-107.1 (m), 90.3 (t,  $J = 20.0$  Hz), 34.8, 30.9 ppm.

**HRMS (m/z):** calcd for  $C_{36}H_{38}F_2O_2P$   $[M+H]^+$  571.2572, found: 571.2569.

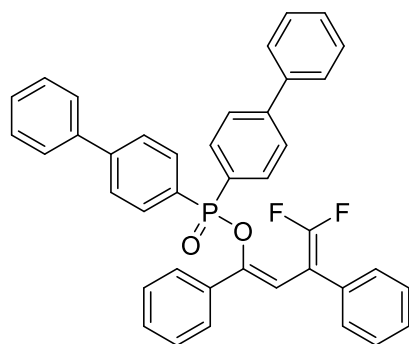

**(Z)-4,4-Difluoro-1,3-diphenylbuta-1,3-dien-1-yl di([1,1'-biphenyl]-4-yl)phosphinate (3af):**

Yield = 36% (65.7 mg). White solid. M.p. 123.5–125.1 °C.

Purified by flash silica gel column chromatography (petroleum ether/ethyl acetate, 10/1~6/1).

**$^1H$  NMR (400 MHz,  $CDCl_3$ ):**  $\delta = 7.66$ -7.60 (m, 4H), 7.60-7.52 (m, 10H), 7.50-7.44 (m, 4H), 7.43-7.38 (m, 2H), 7.32-7.22 (m, 8H), 6.06-6.01 (m, 1H) ppm.

**$^{19}F$  NMR (376 MHz,  $CDCl_3$ ):**  $\delta = -79.28$  (d,  $J = 19.4$  Hz, 1F),  $-86.71$  (d,  $J = 19.4$  Hz, 1F) ppm.

**$^{31}P$  NMR (162 MHz,  $CDCl_3$ ):**  $\delta = 31.41$  ppm.

**$^{13}C$  NMR (100 MHz,  $CDCl_3$ ):**  $\delta = 153.5$  (t,  $J = 295.6$  Hz), 149.6-149.2 (m), 145.0, 144.9, 139.9, 135.7, 132.3 (t,  $J = 4.2$  Hz), 132.1 (d,  $J = 11.1$  Hz), 129.9, 128.9, 128.9, 128.6 (t,  $J = 3.9$  Hz), 128.2 (d,  $J = 5.3$  Hz), 128.1, 127.2, 127.2, 126.9 (d,  $J = 14.0$  Hz), 126.6, 108.0-107.6 (m), 90.3 (t,  $J = 19.1$  Hz) ppm.

**HRMS (m/z):** calcd for C<sub>40</sub>H<sub>30</sub>F<sub>2</sub>O<sub>2</sub>P [M+H]<sup>+</sup> 611.1946, found: 611.1949.

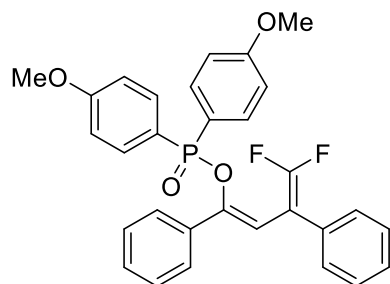

**(Z)-4,4-Difluoro-1,3-diphenylbuta-1,3-dien-1-yl bis(4-methoxyphenyl)phosphinate (3ag):**

Yield = 50% (78.4 mg). Yellow solid. M.p. 87.4–88.2 °C.

Purified by flash silica gel column chromatography (petroleum ether/ethyl acetate, 10/1~4/1).

**<sup>1</sup>H NMR (400 MHz, CDCl<sub>3</sub>):** δ = 7.58-7.50 (m, 2H), 7.47-7.38 (m, 4H), 7.31-7.21 (m, 8H), 6.82-6.75 (m, 4H), 5.96-5.92 (m, 1H), 3.78 (s, 6H) ppm.

**<sup>19</sup>F NMR (376 MHz, CDCl<sub>3</sub>):** δ = -79.30 (d, *J* = 19.4 Hz, 1F), -86.82 (d, *J* = 19.4 Hz, 1F) ppm.

**<sup>31</sup>P NMR (162 MHz, CDCl<sub>3</sub>):** δ = 32.24 ppm.

**<sup>13</sup>C NMR (100 MHz, CDCl<sub>3</sub>):** δ = 162.5 (d, *J* = 2.9 Hz), 153.5 (t, *J* = 294.5 Hz), 149.7-149.3 (m), 135.9, 133.4 (d, *J* = 12.0 Hz), 132.4 (t, *J* = 4.8 Hz), 128.5 (t, *J* = 4.1 Hz), 128.1 (d, *J* = 4.3 Hz), 127.9 (d, *J* = 176.6 Hz), 126.5, 123.0, 121.6, 113.7, 113.5, 108.0-106.8 (m), 90.2 (t, *J* = 18.7 Hz), 55.2 ppm.

**HRMS (m/z):** calcd for C<sub>30</sub>H<sub>26</sub>F<sub>2</sub>O<sub>4</sub>P [M+H]<sup>+</sup> 519.1531, found: 519.1531.

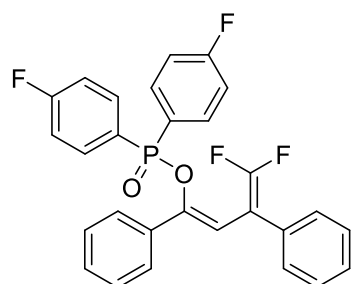

**(Z)-4,4-Difluoro-1,3-diphenylbuta-1,3-dien-1-yl bis(4-fluorophenyl)phosphinate (3ah):**

Yield = 51% (75.1 mg). White solid. M.p. 120.9–121.6 °C.

Purified by flash silica gel column chromatography (petroleum ether/ethyl acetate, 10/1~6/1).

**<sup>1</sup>H NMR (400 MHz, CDCl<sub>3</sub>):** δ = 7.50-7.42 (m, 6H), 7.31-7.24 (m, 8H), 7.01-6.94 (m, 4H), 6.00 (q, *J* = 3.1 Hz, 1H) ppm.

**<sup>19</sup>F NMR (376 MHz, CDCl<sub>3</sub>):** δ = -79.57 (d, *J* = 19.4 Hz, 1F), -86.76 (d, *J* = 19.4 Hz, 1F), -105.60 (p, *J* = 7.4 Hz, 2F) ppm.

**<sup>31</sup>P NMR (162 MHz, CDCl<sub>3</sub>):** δ = 29.08 ppm.

**<sup>13</sup>C NMR (100 MHz, CDCl<sub>3</sub>):** δ = 165.1 (dd, *J* = 254.1, 3.6 Hz), 153.6 (t, *J* = 294.0 Hz), 149.4-148.9 (m), 135.4, 134.1 (d, *J* = 9.2 Hz), 134.0 (d, *J* = 9.2 Hz), 132.1 (t, *J* = 4.1 Hz), 129.1, 128.6 (t, *J* = 3.9 Hz), 128.2 (d, *J* = 10.6 Hz), 127.3, 126.5, 126.5 (dd, *J* = 126.5, 3.4 Hz), 115.6 (dd, *J* = 21.7, 14.9 Hz), 108.5-107.4 (m), 90.3 (t, *J* = 20.2 Hz) ppm.

**HRMS (m/z):** calcd for C<sub>28</sub>H<sub>20</sub>F<sub>4</sub>O<sub>2</sub>P [M+H]<sup>+</sup> 495.1132, found: 495.1128.

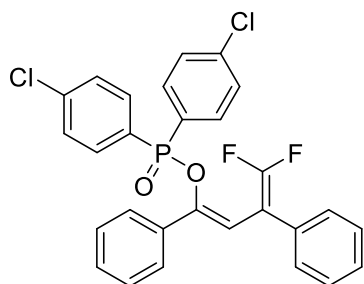

**(Z)-4,4-Difluoro-1,3-diphenylbuta-1,3-dien-1-yl bis(4-chlorophenyl)phosphinate (3ai):**

Yield = 56% (89.2 mg). White solid. M.p. 135.8–137.3 °C.

Purified by flash silica gel column chromatography (petroleum ether/ethyl acetate, 10/1~6/1).

<sup>1</sup>H NMR (400 MHz, CDCl<sub>3</sub>): δ = 7.49-7.44 (m, 2H), 7.41-7.34 (m, 4H), 7.31-7.23 (m, 12H), 6.00 (q, *J* = 3.3 Hz, 1H) ppm.

<sup>19</sup>F NMR (376 MHz, CDCl<sub>3</sub>): δ = -79.41 (d, *J* = 19.1 Hz, 1F), -86.53 (d, *J* = 19.4 Hz, 1F) ppm.

<sup>31</sup>P NMR (162 MHz, CDCl<sub>3</sub>): δ = 28.98 ppm.

<sup>13</sup>C NMR (100 MHz, CDCl<sub>3</sub>): δ = 153.6 (t, *J* = 293.8 Hz), 149.4-148.6 (m), 139.0 (d, *J* = 3.9 Hz), 135.3, 132.9 (d, *J* = 11.6 Hz), 132.0 (t, *J* = 4.0 Hz), 129.1, 128.7 (d, *J* = 139.1 Hz), 128.7, 128.5, 128.5, 128.2 (d, *J* = 9.2 Hz), 127.3, 126.5, 108.1-107.9 (m), 90.2 (t, *J* = 19.1 Hz) ppm.

HRMS (m/z): calcd for C<sub>28</sub>H<sub>20</sub>Cl<sub>2</sub>F<sub>2</sub>O<sub>2</sub>P [M+H]<sup>+</sup> 527.0541, found: 527.0543.

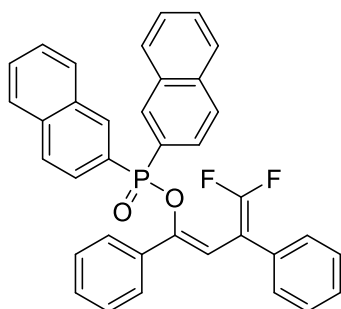

**(Z)-4,4-Difluoro-1,3-diphenylbuta-1,3-dien-1-yl di(naphthalen-2-yl)phosphinate (3aj):**

Yield = 67% (111.9 mg). White solid. M.p. 120.4–122.3 °C.

Purified by flash silica gel column chromatography (petroleum ether/ethyl acetate, 10/1~6/1).

<sup>1</sup>H NMR (400 MHz, CDCl<sub>3</sub>): δ = 8.22 (d, *J* = 14.6 Hz, 2H), 7.79-7.73 (m, 5H), 7.72 (d, *J* = 3.8 Hz, 1H), 7.58-7.52 (m, 5H), 7.52-7.45 (m, 3H), 7.24-7.18 (m, 3H), 7.16-7.06 (m, 5H), 6.01-5.95 (m, 1H) ppm.

<sup>19</sup>F NMR (376 MHz, CDCl<sub>3</sub>): δ = -79.13 (d, *J* = 19.4 Hz, 1F), -86.42 (d, *J* = 19.4 Hz, 1F) ppm.

<sup>31</sup>P NMR (162 MHz, CDCl<sub>3</sub>): δ = 31.53 ppm.

<sup>13</sup>C NMR (100 MHz, CDCl<sub>3</sub>): δ = 153.4 (t, *J* = 294.2 Hz), 149.8-149.2 (m), 135.6, 134.7 (d, *J* = 2.9 Hz), 133.7 (d, *J* = 10.1 Hz), 132.1, 132.0 (t, *J* = 4.3 Hz), 132.0, 128.9, 128.9, 128.3 (t, *J* = 4.1 Hz), 128.1 (d, *J* = 10.1 Hz), 128.0, 127.9, 127.9, 127.8 (d, *J* = 137.2 Hz), 127.6, 127.1, 126.6 (d, *J* = 20.2 Hz), 126.2 (d, *J* = 11.1 Hz), 107.7, 90.2 (t, *J* = 19.7 Hz) ppm.

HRMS (m/z): calcd for C<sub>36</sub>H<sub>26</sub>F<sub>2</sub>O<sub>2</sub>P [M+H]<sup>+</sup> 559.1633, found: 559.1637.

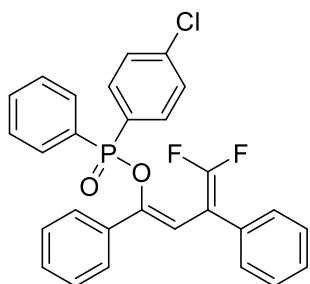

**(Z)-4,4-Difluoro-1,3-diphenylbuta-1,3-dien-1-yl (4-chlorophenyl)(phenyl)phosphinate (3ak):**

Yield = 51% (75.9 mg). White solid. M.p. 105.0–106.0 °C.

Purified by flash silica gel column chromatography (petroleum ether/ethyl acetate, 10/1~6/1).

<sup>1</sup>H NMR (400 MHz, CDCl<sub>3</sub>): δ = 7.53-7.42 (m, 5H), 7.42-7.35 (m, 2H), 7.34-7.22 (m, 12H), 5.99 (q, *J* = 3.0 Hz, 1H) ppm.

<sup>19</sup>F NMR (376 MHz, CDCl<sub>3</sub>): δ = -79.45 (d, *J* = 19.4 Hz, 1F), -86.76 (d, *J* = 19.2 Hz, 1F) ppm.

<sup>31</sup>P NMR (162 MHz, CDCl<sub>3</sub>): δ = 30.08 ppm.

<sup>13</sup>C NMR (100 MHz, CDCl<sub>3</sub>): δ = 153.5 (t, *J* = 296.0 Hz), 149.4-149.0 (m), 138.7 (d, *J* = 3.4 Hz), 135.5, 132.9 (d, *J* = 11.6 Hz), 132.3 (d, *J* = 2.9 Hz), 132.1 (t, *J* = 4.6 Hz), 131.4 (d, *J* = 10.6 Hz), 130.2 (d, *J* = 138.1 Hz), 129.8, 129.0, 128.5 (t, *J* = 3.4 Hz), 128.5, 128.3 (d, *J* = 8.2 Hz), 128.2 (d, *J* = 9.1 Hz), 128.1, 127.2, 126.5, 108.0-107.7 (m), 90.2 (t, *J* = 19.0 Hz) ppm.

HRMS (m/z): calcd for C<sub>28</sub>H<sub>21</sub>ClF<sub>2</sub>O<sub>2</sub>P [M+H]<sup>+</sup> 493.0930, found: 493.0934.

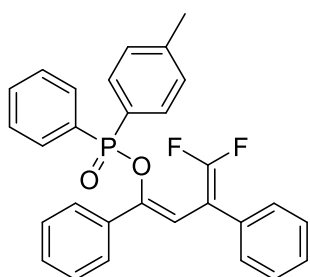

**(Z)-4,4-Difluoro-1,3-diphenylbuta-1,3-dien-1-yl phenyl(*p*-tolyl)phosphinate (3al):**

Yield = 59% (84.0 mg). Yellow oil.

Purified by flash silica gel column chromatography (petroleum ether/ethyl acetate, 10/1~6/1).

<sup>1</sup>H NMR (400 MHz, CDCl<sub>3</sub>): δ = 7.58-7.48 (m, 4H), 7.46-7.37 (m, 3H), 7.33-7.24 (m, 10H), 7.12 (dd, *J* = 8.1, 3.6 Hz, 2H), 6.01-5.95 (m, 1H), 2.34 (s, 3H) ppm.

<sup>19</sup>F NMR (376 MHz, CDCl<sub>3</sub>): δ = -79.42 (d, *J* = 19.4 Hz, 1F), -87.00 (d, *J* = 19.3 Hz, 1F) ppm.

<sup>31</sup>P NMR (162 MHz, CDCl<sub>3</sub>): δ = 31.82 ppm.

<sup>13</sup>C NMR (100 MHz, CDCl<sub>3</sub>): δ = 153.4 (t, *J* = 292.7 Hz), 149.6-149.1 (m), 142.7 (d, *J* = 2.9 Hz), 135.7, 132.3 (t, *J* = 4.3 Hz), 132.0 (d, *J* = 2.9 Hz), 131.5 (d, *J* = 25.2 Hz), 131.5 (d, *J* = 3.9 Hz), 130.8 (d, *J* = 136.8 Hz), 128.9, 128.8, 128.7, 128.5 (t, *J* = 4.1 Hz), 128.1, 128.0, 127.9 (t, *J* = 7.2 Hz), 127.1, 126.5, 107.8-107.2 (m), 90.2 (t, *J* = 19.5 Hz), 21.5 ppm.

HRMS (m/z): calcd for C<sub>29</sub>H<sub>24</sub>F<sub>2</sub>O<sub>2</sub>P [M+H]<sup>+</sup> 473.1476, found: 473.1476.



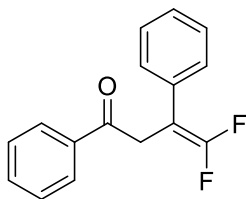

**4,4-Difluoro-1,3-diphenylbut-3-en-1-one (4):**

Yield = 65% (50.7 mg). White solid. M.p. 66.7–68.4 °C.

Purified by flash silica gel column chromatography (petroleum ether/ethyl acetate, 100/1).

**<sup>1</sup>H NMR (400 MHz, CDCl<sub>3</sub>):**  $\delta$  = 8.00-7.93 (m, 2H), 7.60-7.53 (m, 1H), 7.49-7.43 (m, 2H), 7.34-7.28 (m, 4H), 7.27-7.20 (m, 1H), 4.06 (t,  $J$  = 2.2 Hz, 2H) ppm.

**<sup>19</sup>F NMR (376 MHz, CDCl<sub>3</sub>):**  $\delta$  = -87.94 (d,  $J$  = 37.3 Hz, 1F), -88.98 (d,  $J$  = 37.2 Hz, 1F) ppm.

**<sup>13</sup>C NMR (100 MHz, CDCl<sub>3</sub>):**  $\delta$  = 195.3 (t,  $J$  = 2.7 Hz), 154.7 (dd,  $J$  = 292.4, 288.0 Hz), 136.2, 133.5, 133.4, 128.7, 128.5, 128.1, 128.0 (t,  $J$  = 3.6 Hz), 127.4, 87.1 (dd,  $J$  = 21.7, 17.3 Hz), 38.3 (d,  $J$  = 2.4 Hz) ppm.

**HRMS (m/z):** calcd for C<sub>16</sub>H<sub>13</sub>F<sub>2</sub>O [M+H]<sup>+</sup> 259.0929, found: 259.0934.

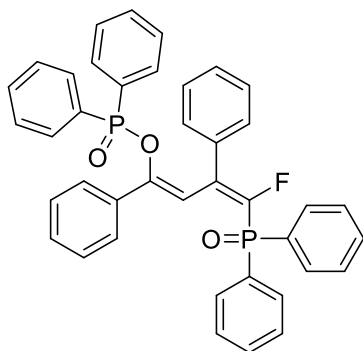

**(1Z,3E)-4-(Diphenylphosphoryl)-4-fluoro-1,3-diphenylbuta-1,3-dien-1-yl diphenylphosphinate (5):**

Yield = 54% (104.6 mg). White solid. M.p. 215.1–216.3 °C.

Purified by flash silica gel column chromatography (petroleum ether/ethyl acetate, 4/1~1/1).

**<sup>1</sup>H NMR (400 MHz, CDCl<sub>3</sub>):**  $\delta$  = 7.95-7.85 (m, 4H), 7.60-7.53 (m, 2H), 7.53-7.44 (m, 5H), 7.43-7.35 (m, 4H), 7.33-7.26 (m, 3H), 7.26-7.18 (m, 6H), 7.17-7.08 (m, 7H) ppm.

**<sup>19</sup>F NMR (376 MHz, CDCl<sub>3</sub>):**  $\delta$  = -117.90 (d,  $J$  = 83.4 Hz, 1F) ppm.

**<sup>31</sup>P NMR (162 MHz, CDCl<sub>3</sub>):**  $\delta$  = 31.15, 22.83 (d,  $J$  = 84.5 Hz) ppm.

**<sup>13</sup>C NMR (100 MHz, CDCl<sub>3</sub>):**  $\delta$  = 149.6 (t,  $J$  = 8.5 Hz), 136.0, 134.4 (dd,  $J$  = 17.5, 10.4 Hz), 133.8 (d,  $J$  = 8.2 Hz), 132.3 (d,  $J$  = 3.4 Hz), 131.9, 131.8, 131.7, 131.4 (d,  $J$  = 10.6 Hz), 130.7 (d,  $J$  = 108.4 Hz), 130.0 (d,  $J$  = 137.0 Hz), 129.7 (d,  $J$  = 4.3 Hz), 128.5 (d,  $J$  = 12.6 Hz), 128.5, 128.0, 127.8, 127.7 (d,  $J$  = 1.8 Hz), 127.6, 126.5, 110.1 ppm.

**HRMS (m/z):** calcd for C<sub>40</sub>H<sub>32</sub>FO<sub>3</sub>P<sub>2</sub> [M+H]<sup>+</sup> 641.1805, found: 641.1799.

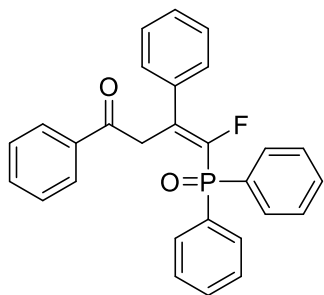

**(E)-4-(Diphenylphosphoryl)-4-fluoro-1,3-diphenylbut-3-en-1-one (6)**

Yield = 69% (91.8 mg). Yellow oil.

Purified by flash silica gel column chromatography (petroleum ether/ethyl acetate, 10/1~6/1).

<sup>1</sup>H NMR (400 MHz, CDCl<sub>3</sub>): δ = 8.04-7.95 (m, 2H), 7.92-7.82 (m, 4H), 7.61-7.55 (m, 2H), 7.53-7.46 (m, 5H), 7.44-7.36 (m, 4H), 7.36-7.25 (m, 3H), 5.00 (s, 2H) ppm.

<sup>19</sup>F NMR (376 MHz, CDCl<sub>3</sub>): δ = -115.67 (d, *J* = 84.9 Hz, 1F) ppm.

<sup>31</sup>P NMR (162 MHz, CDCl<sub>3</sub>): δ = 23.53 (d, *J* = 86.7 Hz) ppm.

<sup>13</sup>C NMR (100 MHz, CDCl<sub>3</sub>): δ = 196.5, 149.8 (dd, *J* = 275.5, 128.1 Hz), 136.6, 136.0 (dd, *J* = 8.4, 3.0 Hz), 133.4 (dd, *J* = 19.3, 7.7 Hz), 133.0, 132.5 (d, *J* = 2.9 Hz), 131.9 (d, *J* = 10.6 Hz), 130.3 (d, *J* = 108.9 Hz), 128.6, 128.5, 128.4, 128.3, 128.2 (d, *J* = 3.4 Hz), 128.0 (d, *J* = 3.9 Hz), 40.2 ppm.

HRMS (m/z): calcd for C<sub>28</sub>H<sub>23</sub>FO<sub>2</sub>P [M+H]<sup>+</sup> 441.1414, found: 441.1409.

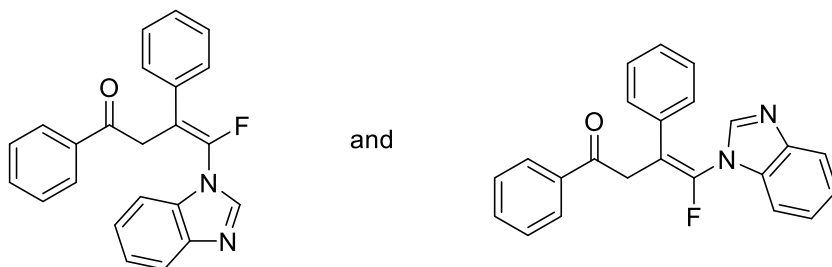

**(Z)-4-(1H-benzo[d]imidazol-1-yl)-4-fluoro-1,3-diphenylbut-3-en-1-one (7) and (E)-4-(1H-benzo[d]imidazol-1-yl)-4-fluoro-1,3-diphenylbut-3-en-1-one (7')**

Yield = 63% (67.4 mg; *Z/E* = 4/3). Colourless oil.

Purified by flash silica gel column chromatography (petroleum ether/ethyl acetate, 10/1~6/1).

<sup>1</sup>H NMR (400 MHz, CDCl<sub>3</sub>) (7 and its isomer 7'): δ = 8.14 (s, 0.4H), 8.07-8.05 (m, 0.6H), 8.05-8.02 (m, 0.6H), 7.85-7.78 (m, 1.4H), 7.78-7.72 (m, 1H), 7.66-7.55 (m, 2H), 7.55-7.49 (m, 2H), 7.45-7.28 (m, 4H), 7.15-7.09 (m, 1.8H), 7.05-6.98 (m, 1.2H), 4.40 (d, *J* = 3.0 Hz, 1.2H), 3.94 (d, *J* = 1.5 Hz, 0.8H) ppm.

<sup>19</sup>F NMR (376 MHz, CDCl<sub>3</sub>) (7 and its isomer 7'): δ = -89.22 (s, 0.43F), -90.41 (s, 0.57F) ppm.

<sup>13</sup>C NMR (100 MHz, CDCl<sub>3</sub>) (7 and its isomer 7'): δ = 195.7 (d, *J* = 4.0 Hz), 194.9 (d, *J* = 2.9 Hz), 145.0, 144.4, 143.0, 142.7, 142.6 (d, *J* = 3.4 Hz), 142.4 (d, *J* = 2.9 Hz), 142.3, 141.8, 136.2, 135.8, 135.0 (d, *J* = 3.9 Hz), 134.2 (d, *J* = 3.3 Hz), 133.7, 133.6, 133.0, 133.0, 128.8, 128.7, 128.6, 128.4, 128.3 (d, *J* = 3.9 Hz), 128.2, 128.1, 128.1, 127.5 (d, *J* = 3.4 Hz), 124.6, 124.5, 123.7, 123.5, 120.7, 120.4, 113.3 (d, *J* = 23.6 Hz), 112.3 (d, *J* = 26.0 Hz), 111.2, 110.7, 41.1, 40.9 ppm.

HRMS (m/z): calcd for C<sub>23</sub>H<sub>18</sub>FN<sub>2</sub>O [M+H]<sup>+</sup> 357.1398, found: 357.1394.

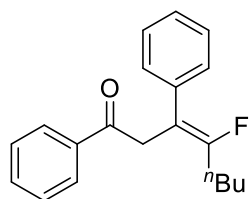

**(Z)-4-Fluoro-1,3-diphenylbut-3-en-1-one (8):**

Yield = 36% (31.6 mg). Yellow oil.

Purified by flash silica gel column chromatography (petroleum ether/ethyl acetate, 100/1).

**<sup>1</sup>H NMR (400 MHz, CDCl<sub>3</sub>):**  $\delta$  = 7.97–7.93 (m, 2H), 7.58–7.52 (m, 1H), 7.47–7.41 (m, 2H), 7.32–7.27 (m, 2H), 7.26–7.22 (m, 1H), 7.21–7.17 (m, 2H), 4.10 (d,  $J$  = 2.7 Hz, 2H), 2.25 (dt,  $J$  = 23.2, 7.5 Hz, 2H), 1.57–1.48 (m, 2H), 1.35–1.25 (m, 2H), 0.84 (t,  $J$  = 7.3 Hz, 3H) ppm.

**<sup>19</sup>F NMR (376 MHz, CDCl<sub>3</sub>):**  $\delta$  = -105.29 (t,  $J$  = 23.1 Hz, 1F) ppm.

**<sup>13</sup>C NMR (100 MHz, CDCl<sub>3</sub>):**  $\delta$  = 196.9 (d,  $J$  = 1.8 Hz), 159.6 (d,  $J$  = 255.3 Hz), 138.4 (d,  $J$  = 8.7 Hz), 136.7, 133.0, 129.0 (d,  $J$  = 2.9 Hz), 128.5, 128.3, 128.2, 127.1, 112.8 (d,  $J$  = 18.8 Hz), 40.9 (d,  $J$  = 6.7 Hz), 28.9 (d,  $J$  = 27.5 Hz), 28.6, 22.0, 13.8 ppm.

**HRMS (m/z):** calcd for C<sub>20</sub>H<sub>22</sub>FO [M+H]<sup>+</sup> 297.1649, found: 297.1643.

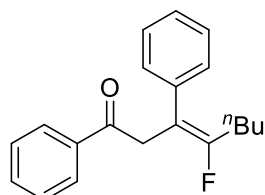

**(E)-4-Fluoro-1,3-diphenylbut-3-en-1-one (8'):**

Yield = 19% (17.2 mg). Yellow oil.

Purified by flash silica gel column chromatography (petroleum ether/ethyl acetate, 100/1).

**<sup>1</sup>H NMR (400 MHz, CDCl<sub>3</sub>):**  $\delta$  = 7.95–7.90 (m, 2H), 7.59–7.54 (m, 1H), 7.47–7.41 (m, 2H), 7.33–7.28 (m, 4H), 7.24–7.18 (m, 1H), 4.02 (s, 2H), 2.35 (dt,  $J$  = 23.2, 7.6 Hz, 2H), 1.64–1.55 (m, 2H), 1.45–1.35 (m, 2H), 0.92 (t,  $J$  = 7.3 Hz, 3H) ppm.

**<sup>19</sup>F NMR (376 MHz, CDCl<sub>3</sub>):**  $\delta$  = -105.29 (t,  $J$  = 23.1 Hz, 1F) ppm.

**<sup>13</sup>C NMR (100 MHz, CDCl<sub>3</sub>):**  $\delta$  = 196.5 (d,  $J$  = 3.3 Hz), 159.0 (d,  $J$  = 255.8 Hz), 137.4, 136.6, 133.2, 128.6, 128.5 (d,  $J$  = 3.4 Hz), 128.1, 128.1, 126.8, 110.9 (d,  $J$  = 17.3 Hz), 41.6 (d,  $J$  = 5.8 Hz), 29.4 (d,  $J$  = 28.4 Hz), 28.5, 22.3, 13.9 ppm.

**HRMS (m/z):** calcd for C<sub>20</sub>H<sub>22</sub>FO [M+H]<sup>+</sup> 297.1649, found: 297.1650.

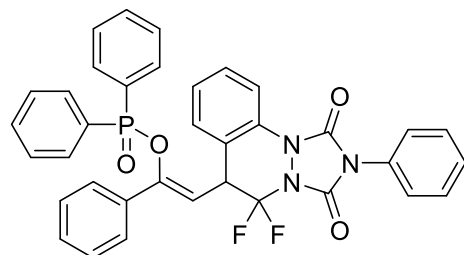

**(Z)-2-(5,5-Difluoro-1,3-dioxo-2-phenyl-2,3,5,6-tetrahydro-1H-[1,2,4]triazolo[1,2-a]cinnolin-6-yl)-1-phenylvinyl diphenylphosphinate (10):**

Yield = 33% (20.7 mg; using 0.1 mmol **3aa**). Yellow oil.

Purified by flash silica gel column chromatography (petroleum ether/ethyl acetate, 6/1~4/1).

**<sup>1</sup>H NMR (400 MHz, CDCl<sub>3</sub>):**  $\delta$  = 8.35 (d,  $J$  = 8.4 Hz, 1H), 7.94–7.83 (m, 2H), 7.75–7.65 (m, 2H), 7.61–7.51 (m, 6H), 7.49–7.37 (m, 5H), 7.36–7.29 (m, 4H), 7.28–7.20 (m, 2H), 7.19–7.13 (m, 2H), 5.58–5.50 (m, 1H), 5.26 (td,  $J$  = 11.0, 7.2 Hz, 1H) ppm.

**<sup>19</sup>F NMR (376 MHz, CDCl<sub>3</sub>):**  $\delta$  = -83.81 (dd,  $J$  = 189.2, 7.5 Hz, 1F), -90.57 (dd,  $J$  = 189.2, 11.9 Hz, 1F) ppm.

**<sup>31</sup>P NMR (162 MHz, CDCl<sub>3</sub>):**  $\delta$  = 32.04 ppm.

**<sup>13</sup>C NMR (100 MHz, CDCl<sub>3</sub>):**  $\delta$  = 151.7, 151.6, 147.3, 146.0, 135.0, 132.7 (dd,  $J$  = 21.0, 3.1 Hz), 131.8 (d,  $J$  = 10.6 Hz), 131.6 (d,  $J$  = 10.6 Hz), 130.7 (d,  $J$  = 9.9 Hz), 130.4 (d,  $J$  = 55.4 Hz), 129.3, 129.2, 128.9 (d,  $J$  = 3.4 Hz), 128.6 (d,  $J$  = 13.5 Hz), 128.3 (d,  $J$  = 13.5 Hz), 128.1, 126.5, 126.1, 125.6, 121.0, 117.2 (t,  $J$  = 261.7 Hz), 115.9, 110.0–109.8 (m), 43.6–42.8 (m) ppm.

**HRMS (m/z):** calcd for C<sub>36</sub>H<sub>27</sub>F<sub>2</sub>N<sub>3</sub>O<sub>4</sub>P [M+H]<sup>+</sup> 634.1702, found: 634.1705.

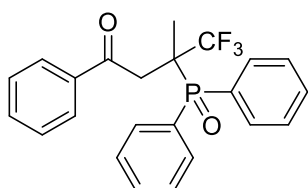

**3-(Diphenylphosphoryl)-4,4,4-trifluoro-3-methyl-1-phenylbutan-1-one (11a):**

Yield = 90% (112.7 mg). White solid. M.p. 121.6–122.5 °C.

Purified by flash silica gel column chromatography (petroleum ether/ethyl acetate, 10/1~6/1).

**<sup>1</sup>H NMR (400 MHz, CDCl<sub>3</sub>):**  $\delta$  = 8.15–8.00 (m, 4H), 7.89–7.82 (m, 2H), 7.60–7.46 (m, 7H), 7.45–7.38 (m, 2H), 3.62 (dd,  $J$  = 15.3, 9.1 Hz, 1H), 3.36 (dd,  $J$  = 15.2, 8.9 Hz, 1H), 1.76 (d,  $J$  = 15.0 Hz, 3H) ppm.

**<sup>19</sup>F NMR (376 MHz, CDCl<sub>3</sub>):**  $\delta$  = -63.47 (d,  $J$  = 2.7 Hz, 3F) ppm.

**<sup>31</sup>P NMR (162 MHz, CDCl<sub>3</sub>):**  $\delta$  = 31.18 ppm.

**<sup>13</sup>C NMR (100 MHz, CDCl<sub>3</sub>):**  $\delta$  = 196.3 (d,  $J$  = 10.6 Hz), 137.5, 133.2, 132.5, 132.4 (d,  $J$  = 3.4 Hz), 132.3 (d,  $J$  = 6.3 Hz), 129.4 (dd,  $J$  = 95.3, 10.1 Hz), 128.6 (d,  $J$  = 5.3 Hz), 128.4 (d,  $J$  = 16.9 Hz), 127.0 (q,  $J$  = 283.4 Hz), 49.7 (dd,  $J$  = 61.4, 24.8 Hz), 36.2, 15.5 ppm.

**HRMS (m/z):** calcd for C<sub>23</sub>H<sub>21</sub>F<sub>3</sub>O<sub>2</sub>P [M+H]<sup>+</sup> 417.1226, found: 417.1224.

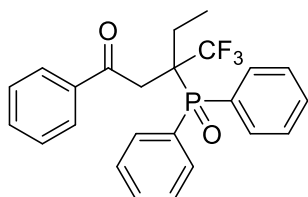

**3-(Diphenylphosphoryl)-1-phenyl-3-(trifluoromethyl)pentan-1-one (11b):**

Yield = 94% (121.3 mg). White solid. M.p. 120.1–121.5 °C.

Purified by flash silica gel column chromatography through silica gel (petroleum ether/ethyl acetate, 10/1~6/1).

**<sup>1</sup>H NMR (400 MHz, CDCl<sub>3</sub>):**  $\delta$  = 8.11–8.04 (m, 2H), 8.03–7.96 (m, 2H), 7.92–7.83 (m, 2H), 7.59–7.38 (m, 9H), 3.90 (dd,  $J$  = 16.6, 7.8 Hz, 1H), 3.55 (dd,  $J$  = 16.6, 13.3 Hz, 1H), 2.50–2.29 (m, 2H), 1.04 (t,  $J$  = 7.4 Hz, 3H) ppm.

**<sup>19</sup>F NMR (376 MHz, CDCl<sub>3</sub>):**  $\delta$  = -61.13 (s, 3F) ppm.

**<sup>31</sup>P NMR (162 MHz, CDCl<sub>3</sub>):**  $\delta$  = 31.57 ppm.

**<sup>13</sup>C NMR (100 MHz, CDCl<sub>3</sub>):**  $\delta$  = 196.0 (d,  $J$  = 8.2 Hz), 137.5, 133.1, 132.4 (d,  $J$  = 8.7 Hz), 132.1 (dd,  $J$  = 6.9, 3.4 Hz), 132.0 (d,  $J$  = 7.3 Hz), 130.3 (dd,  $J$  = 130.0, 93.9 Hz), 128.4 (dd,  $J$  = 11.5, 9.7 Hz), 128.3 (d,  $J$  = 45.4 Hz), 127.0 (q,  $J$  = 283.6 Hz), 54.0 (dd,  $J$  = 59.7, 23.1 Hz), 33.3, 22.2, 9.0 (d,  $J$  = 5.8 Hz) ppm.

**HRMS (m/z):** calcd for C<sub>24</sub>H<sub>23</sub>F<sub>3</sub>O<sub>2</sub>P [M+H]<sup>+</sup> 431.1382, found: 431.1382.

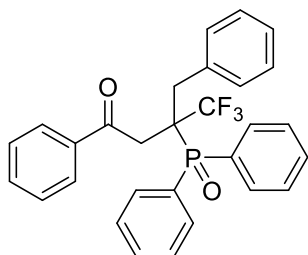

**3-Benzyl-3-(diphenylphosphoryl)-4,4,4-trifluoro-1-phenylbutan-1-one (11c):**

Yield = 82% (121.4 mg). White solid. M.p. 158.2–159.3 °C.

Purified by flash silica gel column chromatography through silica gel (petroleum ether/ethyl acetate, 10/1~6/1).

**<sup>1</sup>H NMR (400 MHz, CDCl<sub>3</sub>):**  $\delta$  = 8.15–8.06 (m, 2H), 8.00 (dd,  $J$  = 11.5, 7.9 Hz, 2H), 7.78 (d,  $J$  = 6.5 Hz, 2H), 7.56–7.46 (m, 4H), 7.43–7.36 (m, 5H), 7.19 (s, 5H), 4.31 (dd,  $J$  = 14.1, 7.9 Hz, 1H), 3.91 (dd,  $J$  = 17.6, 5.6 Hz, 1H), 3.56 (dd,  $J$  = 14.0, 5.5 Hz, 1H), 3.21 (dd,  $J$  = 23.6, 17.6 Hz, 1H) ppm.

**<sup>19</sup>F NMR (376 MHz, CDCl<sub>3</sub>):**  $\delta$  = -60.25 (s, 3F) ppm.

**<sup>31</sup>P NMR (162 MHz, CDCl<sub>3</sub>):**  $\delta$  = 29.73 ppm.

**<sup>13</sup>C NMR (100 MHz, CDCl<sub>3</sub>):**  $\delta$  = 195.9 (d,  $J$  = 3.0 Hz), 136.9, 134.9 (d,  $J$  = 11.6 Hz), 133.1, 132.3 (d,  $J$  = 8.7 Hz), 132.2 (d,  $J$  = 7.9 Hz), 131.9 (d,  $J$  = 1.2 Hz), 131.0 (dd,  $J$  = 103.8, 97.1 Hz), 130.8, 128.2 (d,  $J$  = 25.5 Hz), 128.1 (d,  $J$  = 22.6 Hz), 128.0 (d,  $J$  = 33.7 Hz), 127.0, 126.8 (q,  $J$  = 284.8 Hz), 55.1 (dd,  $J$  = 57.8, 21.7 Hz), 36.2, 34.3 ppm.

**HRMS (m/z):** calcd for C<sub>29</sub>H<sub>25</sub>F<sub>3</sub>O<sub>2</sub>P [M+H]<sup>+</sup> 493.1539, found: 493.1544.

## Reference

- [1] X. Wu, F. Xie, I. D. Gridnev, W. Zhang, *Org. Lett.* **2018**, *20*, 1638.
- [2] Gaussian 16, Revision A.03, M. J. Frisch, G. W. Trucks, H. B. Schlegel, G. E. Scuseria, M. A. Robb, J. R. Cheeseman, G. Scalmani, V. Barone, G. A. Petersson, H. Nakatsuji, X. Li, M. Caricato, A. V. Marenich, J. Bloino, B. G. Janesko, R. Gomperts, B. Mennucci, H. P. Hratchian, J. V. Ortiz, A. F. Izmaylov, J. L. Sonnenberg, D. Williams-Young, F. Ding, F. Lipparini, F. Egidi, J. Goings, B. Peng, A. Petrone, T. Henderson, D. Ranasinghe, V. G. Zakrzewski, J. Gao, N. Rega, G. Zheng, W. Liang, M. Hada, M. Ehara, K. Toyota, R. Fukuda, J. Hasegawa, M. Ishida, T. Nakajima, Y. Honda, O. Kitao, H. Nakai, T. Vreven, K. Throssell, J. A. Montgomery, Jr., J. E. Peralta, F. Ogliaro, M. J. Bearpark, J. J. Heyd, E. N. Brothers, K. N. Kudin, V. N. Staroverov, T. A. Keith, R. Kobayashi, J. Normand, K. Raghavachari, A. P. Rendell, J. C. Burant, S. S. Iyengar, J. Tomasi, M. Cossi, J. M. Millam, M. Klene, C. Adamo, R. Cammi, J. W. Ochterski, R. L. Martin, K. Morokuma, O. Farkas, J. B. Foresman, D. J. Fox, Gaussian, Inc., Wallingford CT, **2016**.

[3] Y. Zhao, D. G. Truhlar, *Theor. Chem. Acc.* **2008**, *120*, 215.

[4] A. V. Marenich, C. J. Cramer, D. G. Truhlar, *J. Phys. Chem. B.* **2009**, *113*, 6378.

# $^1\text{H}$ , $^{19}\text{F}$ , $^{31}\text{P}$ , and $^{13}\text{C}$ NMR spectra of products

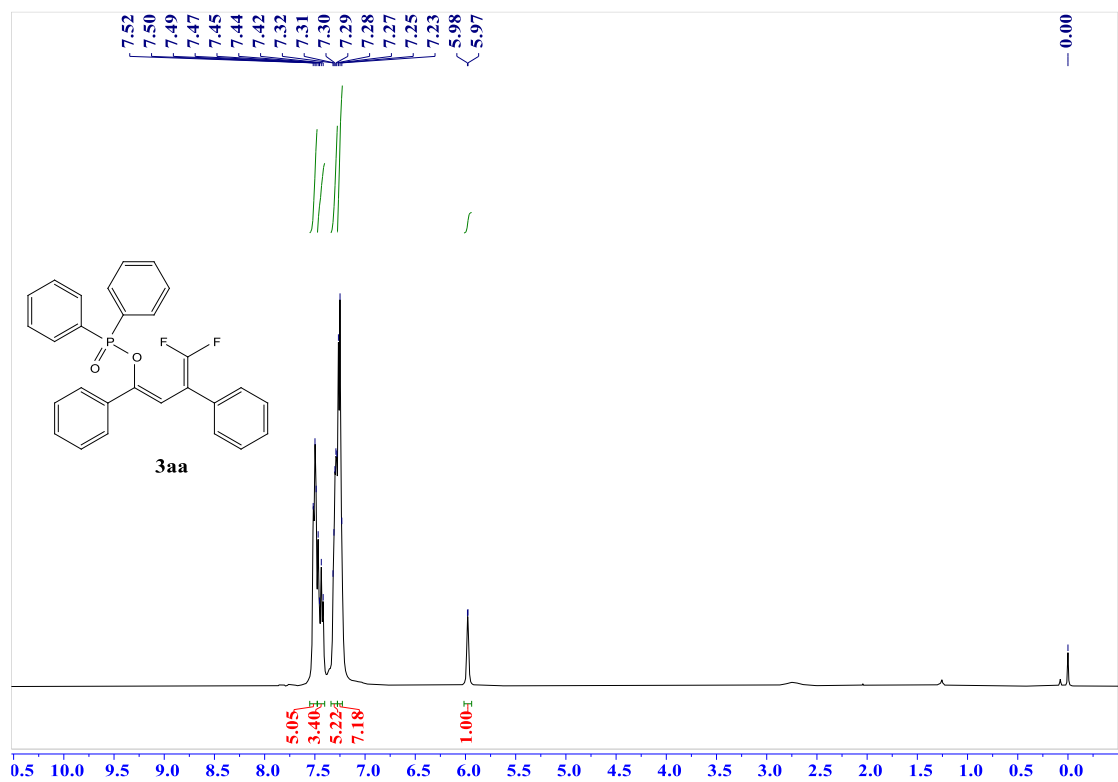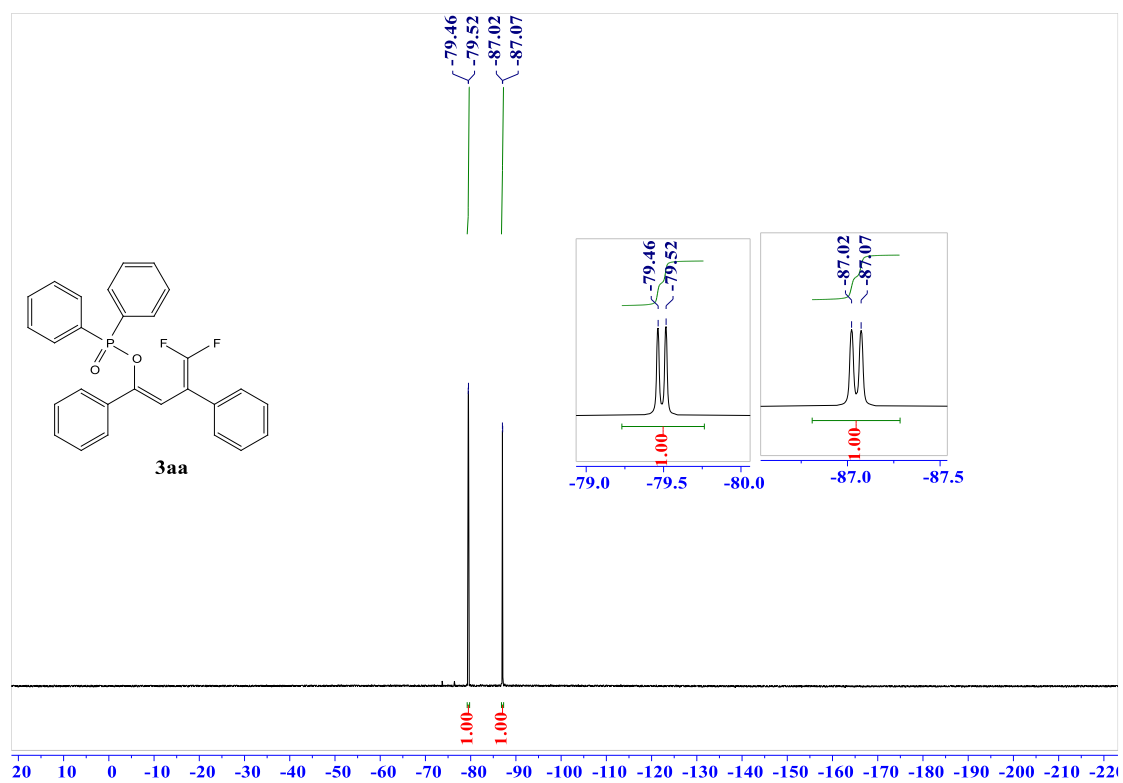

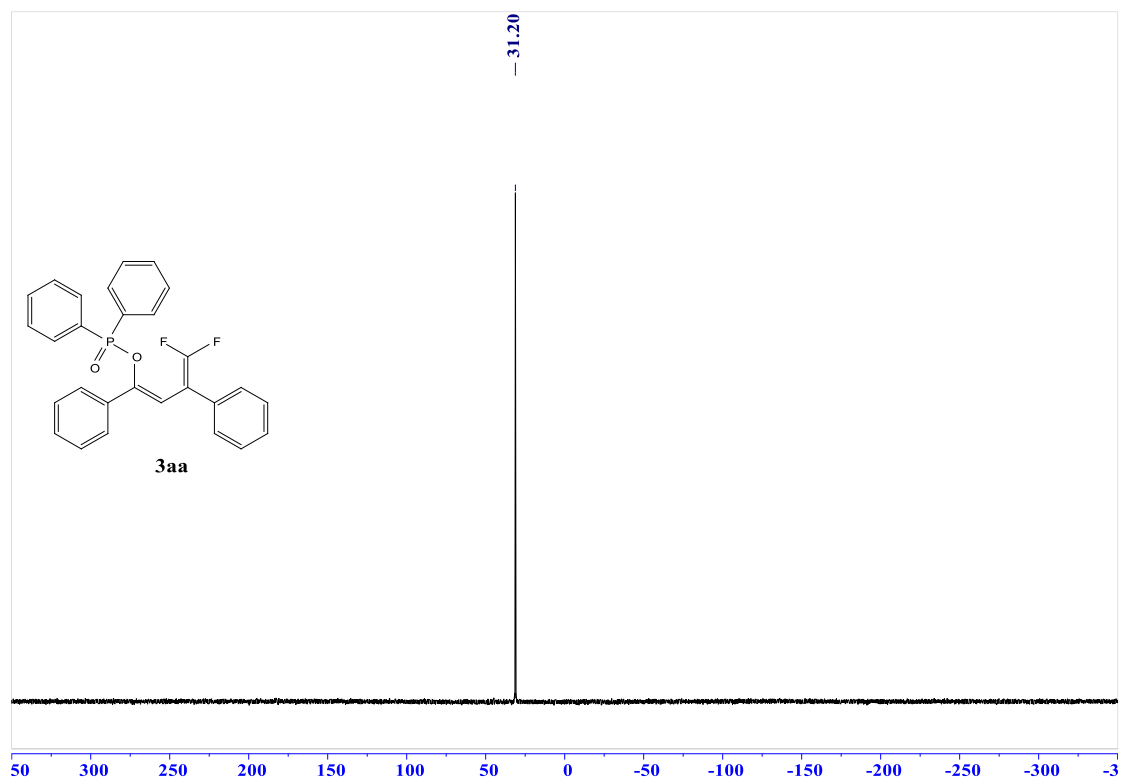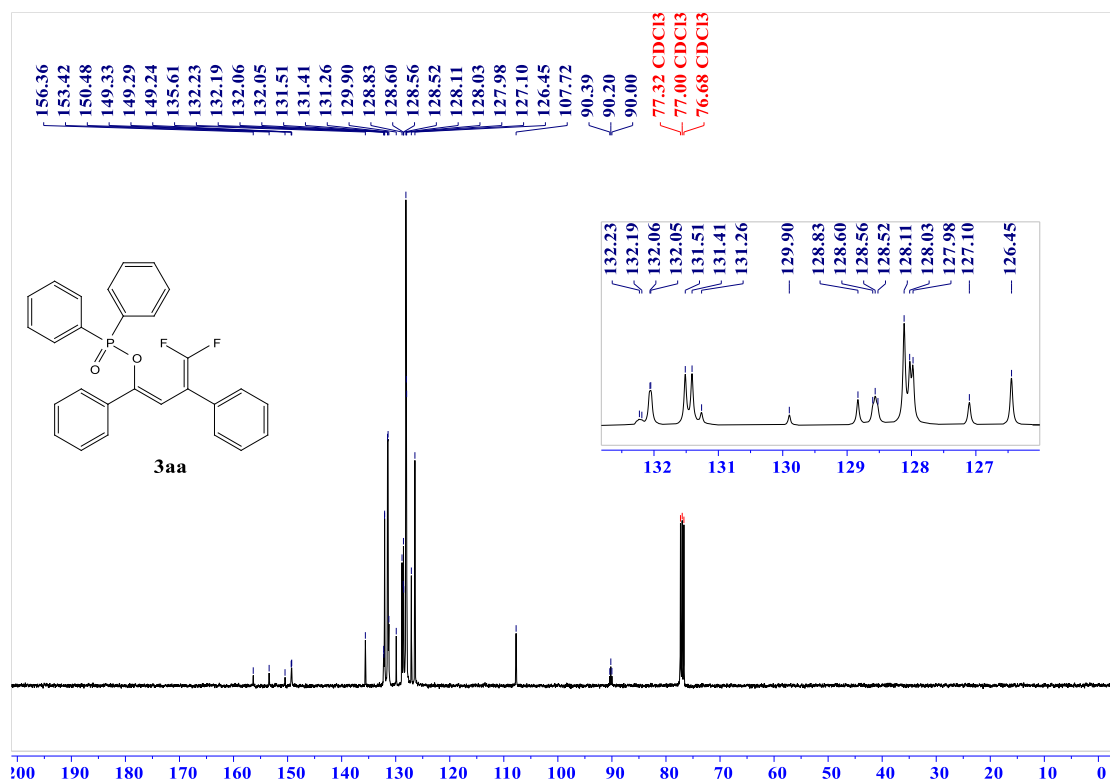



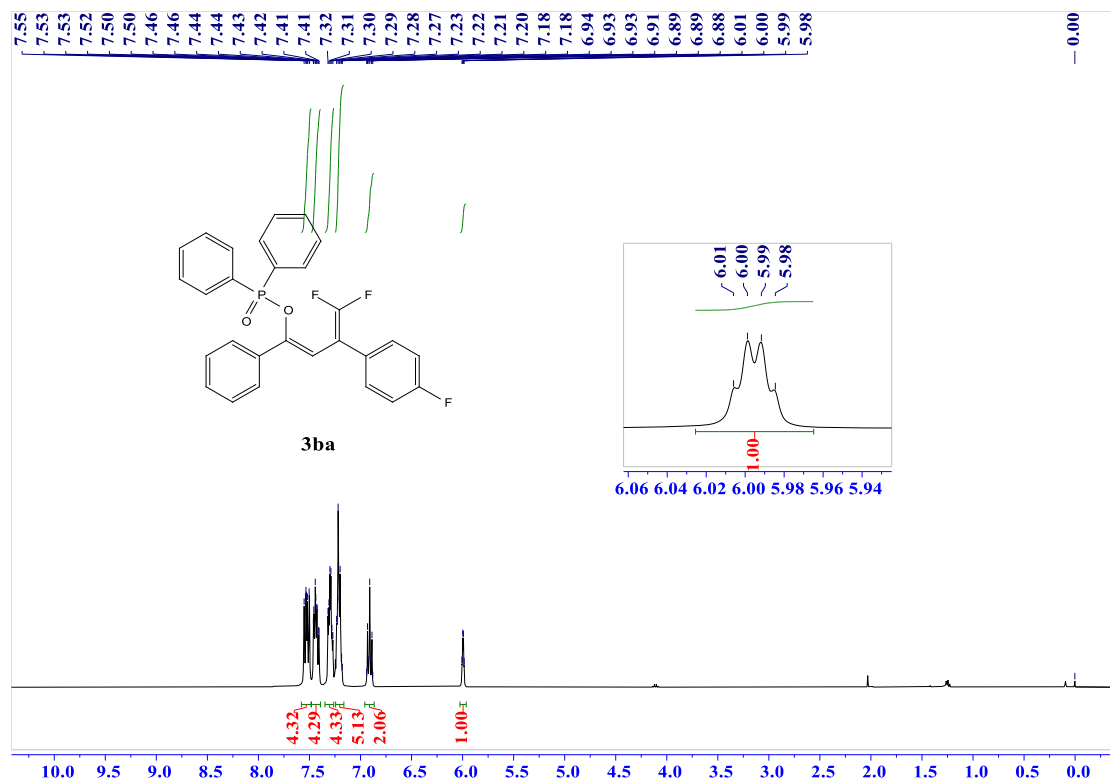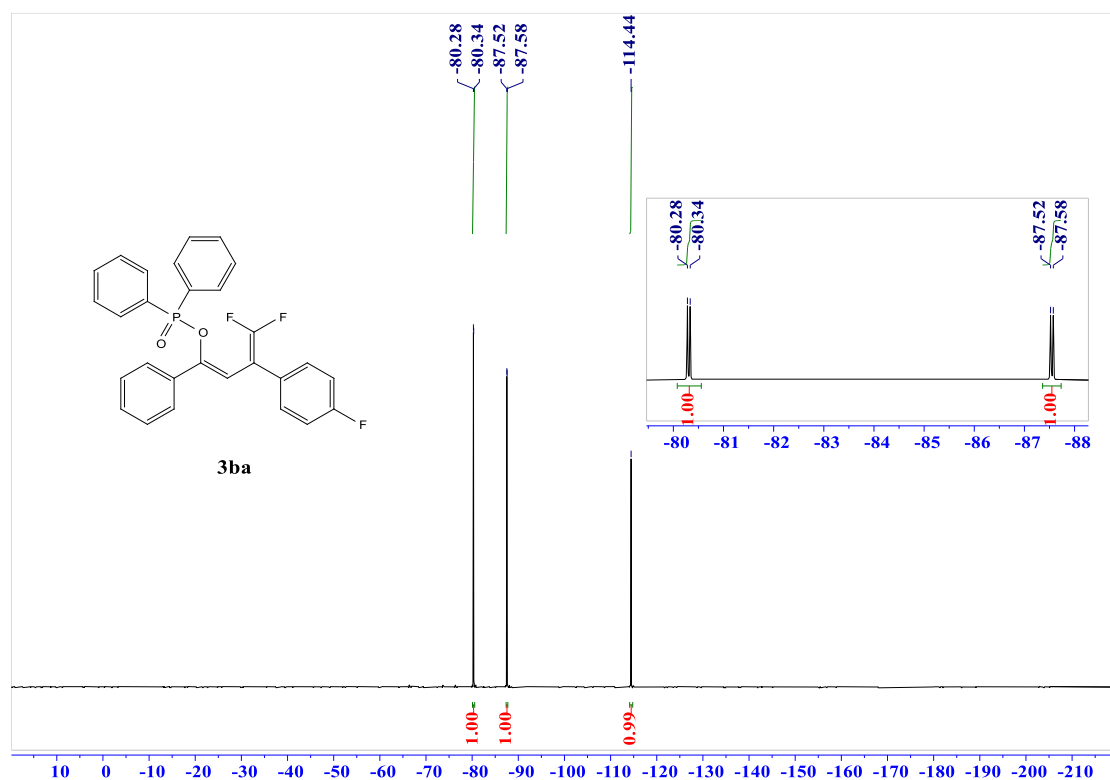

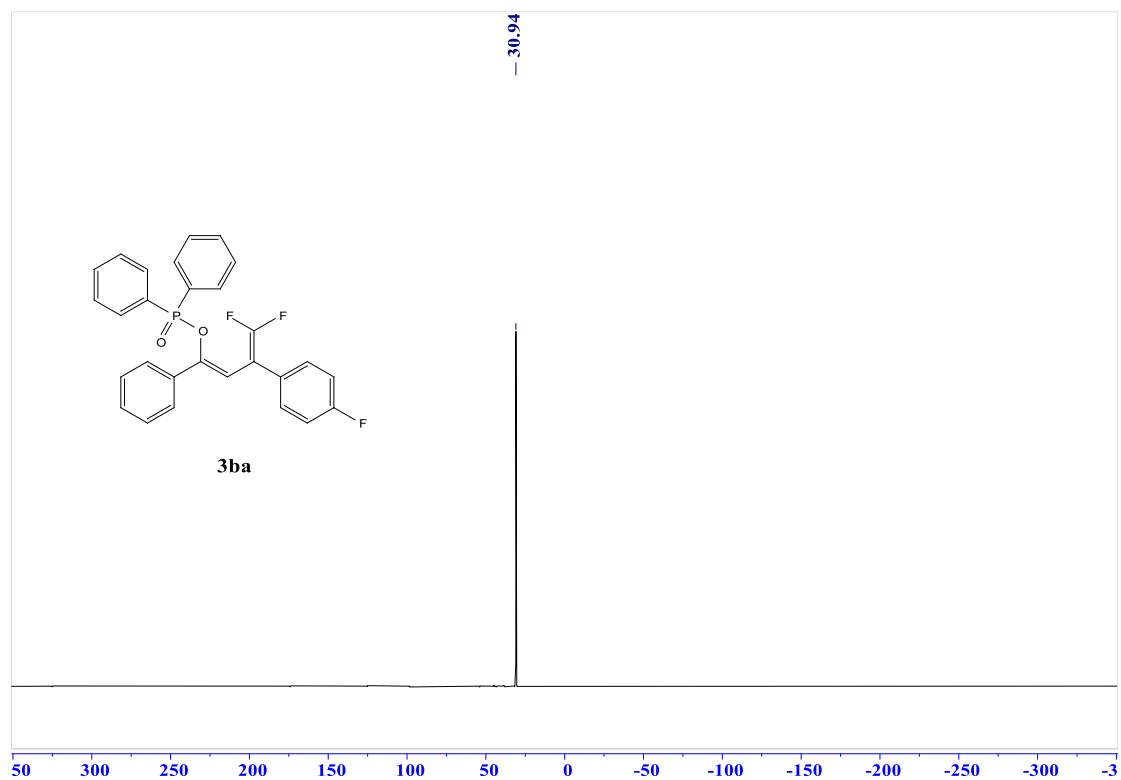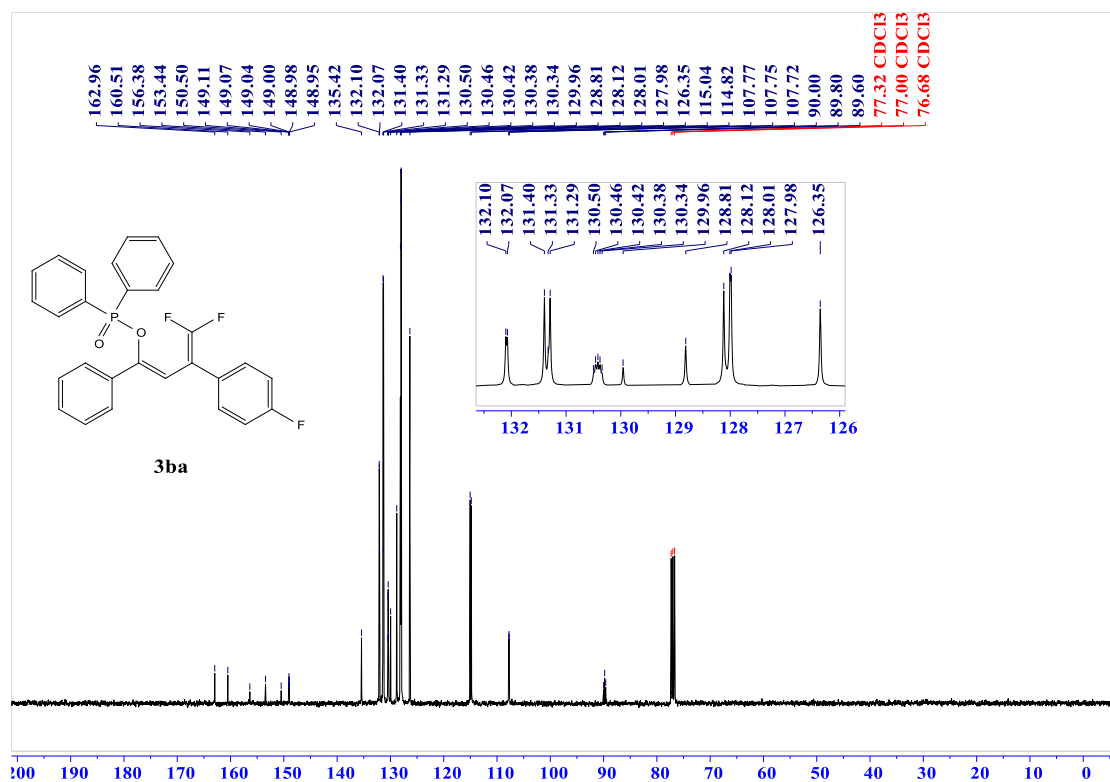

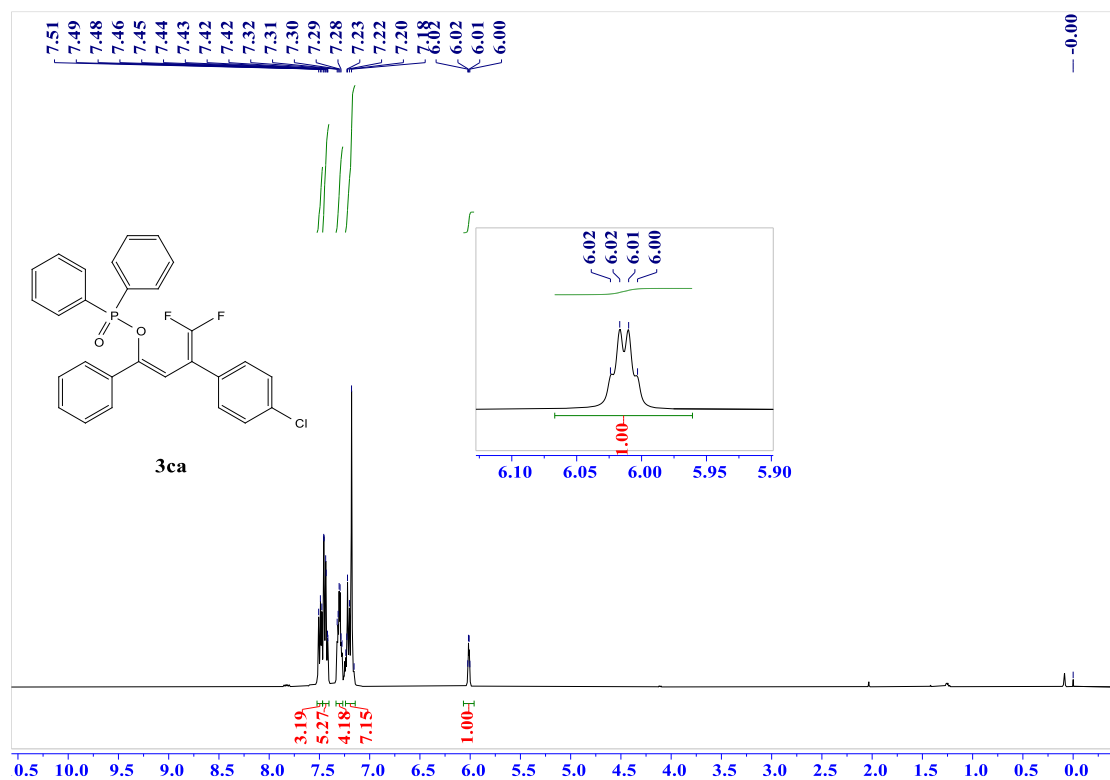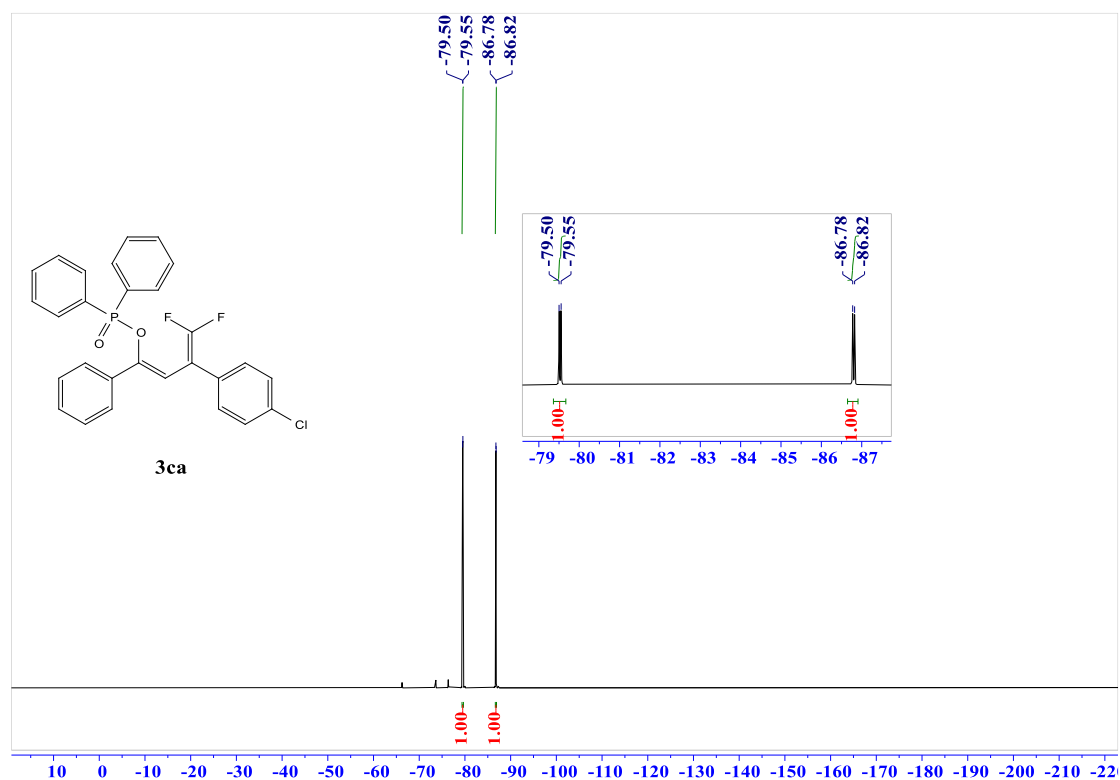

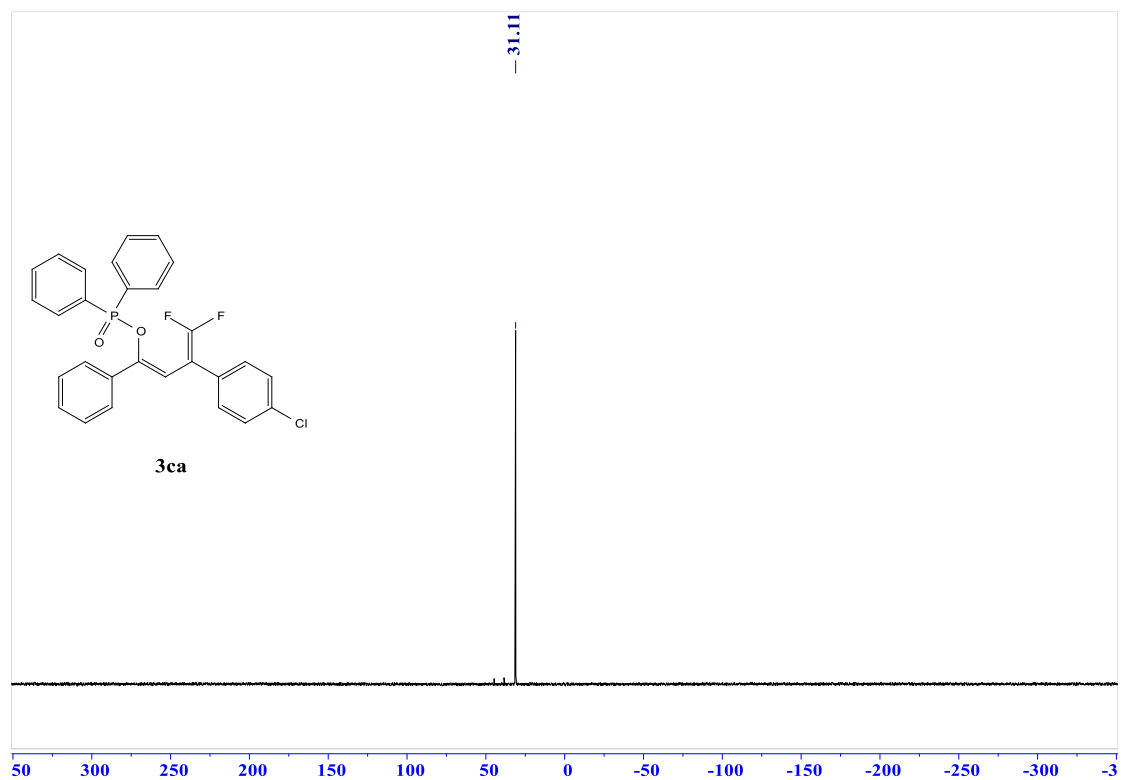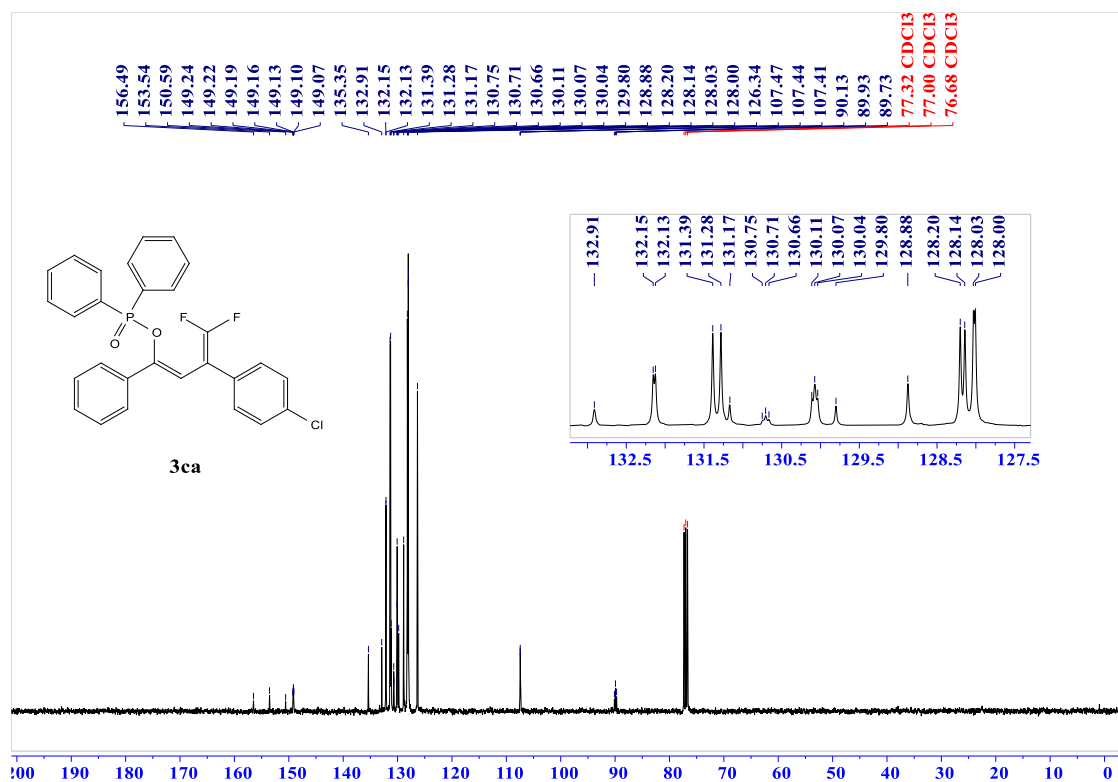

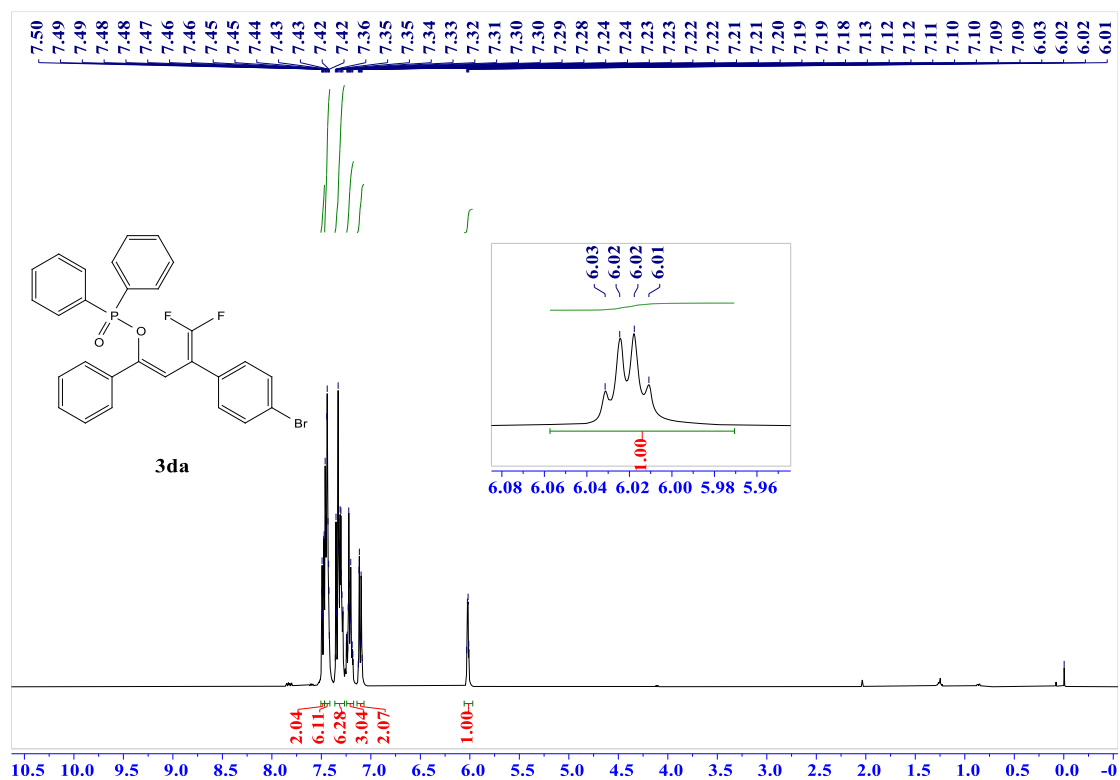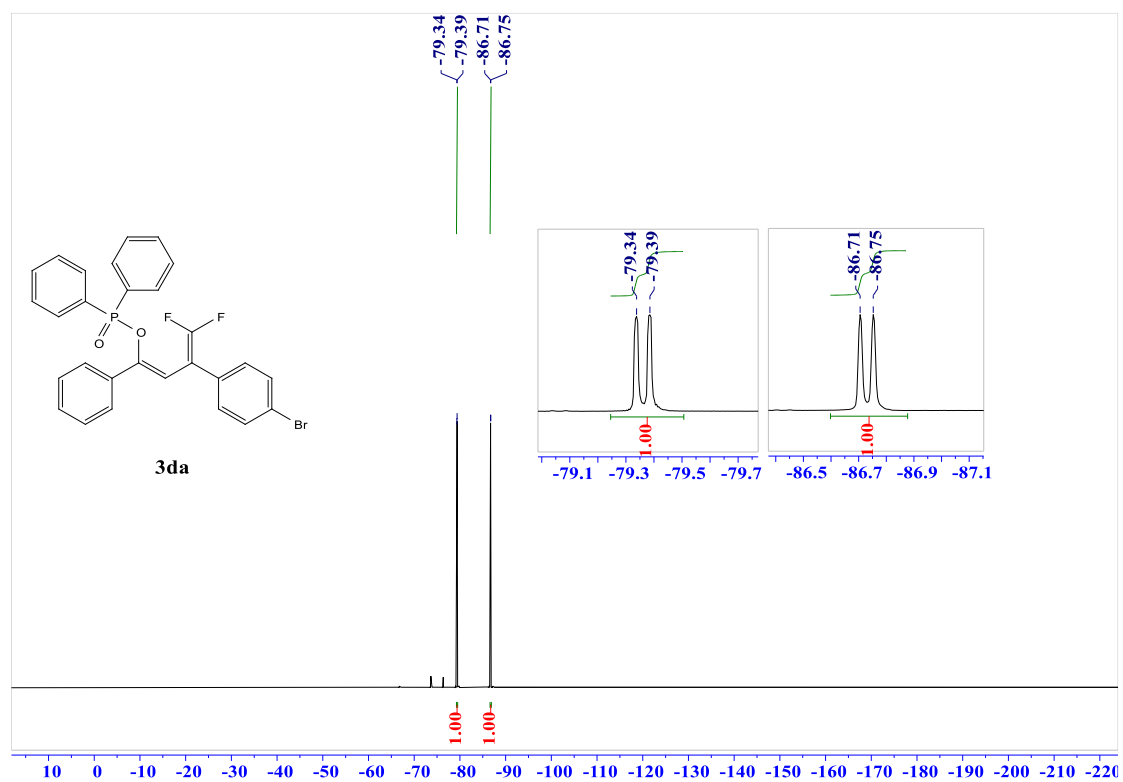

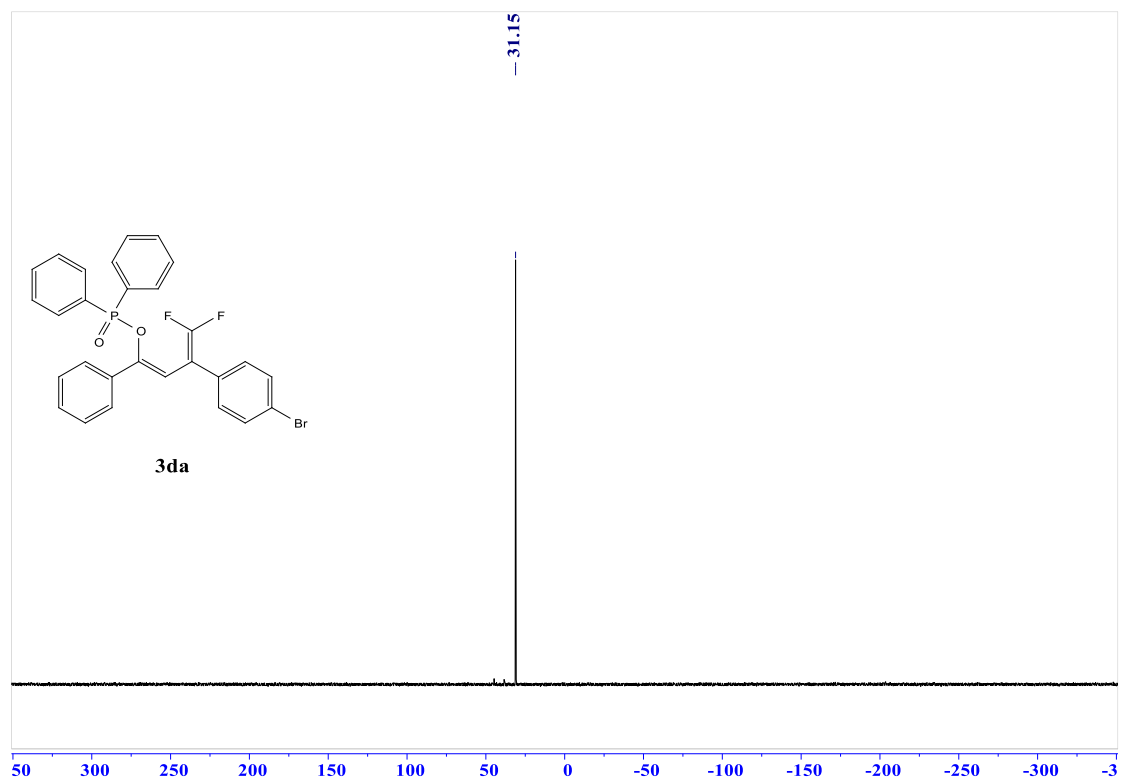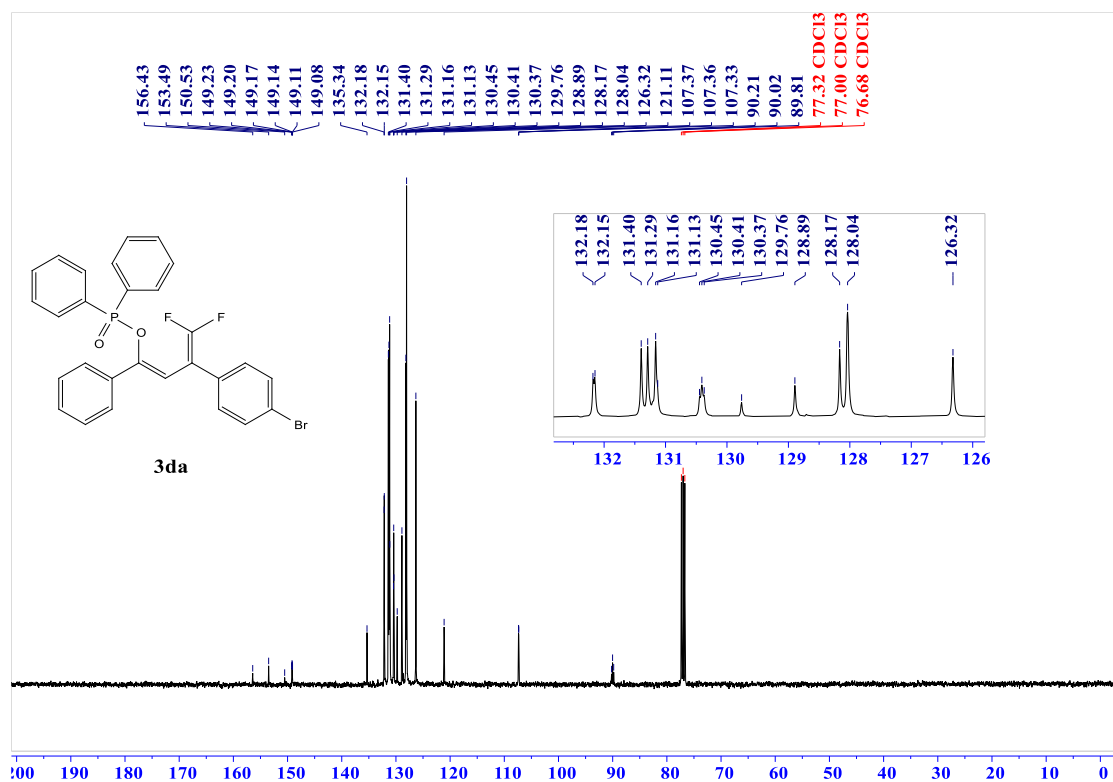

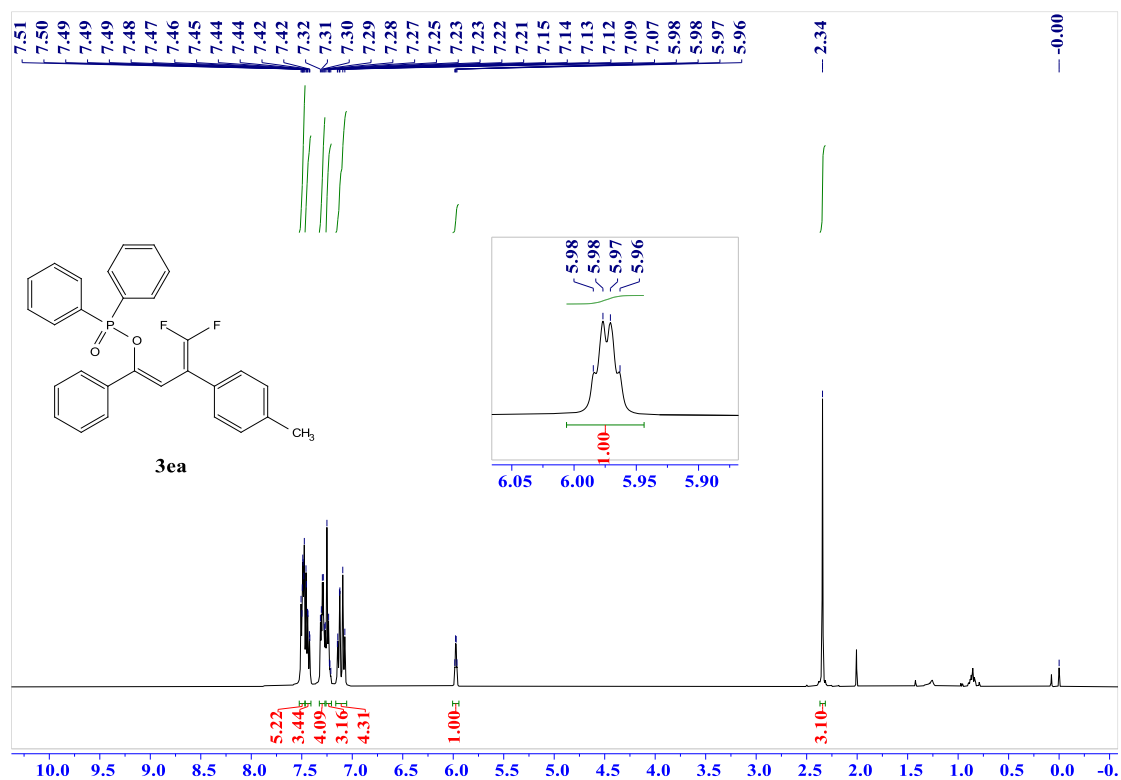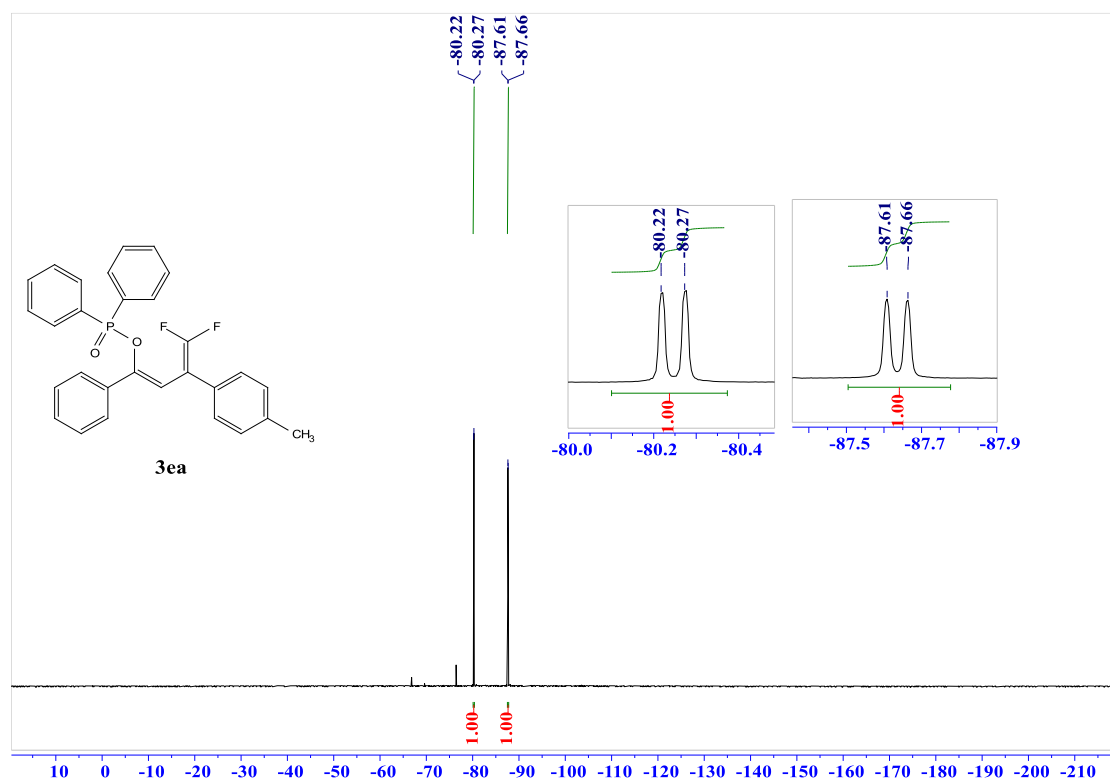

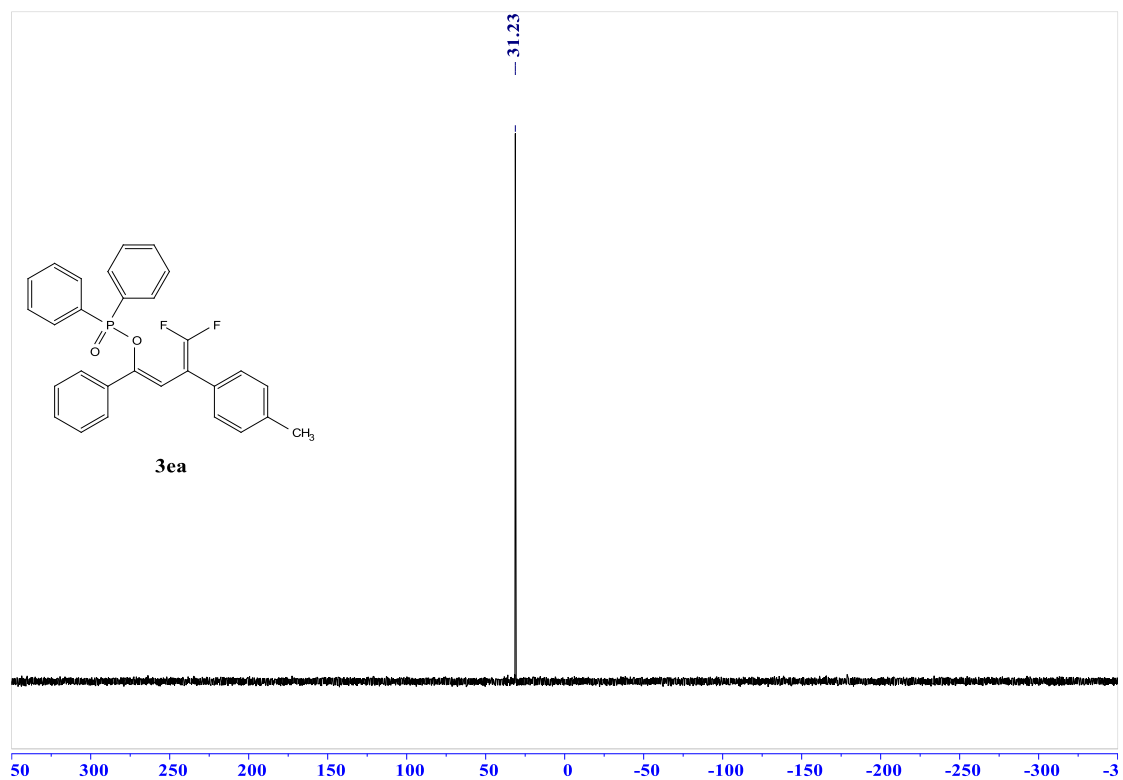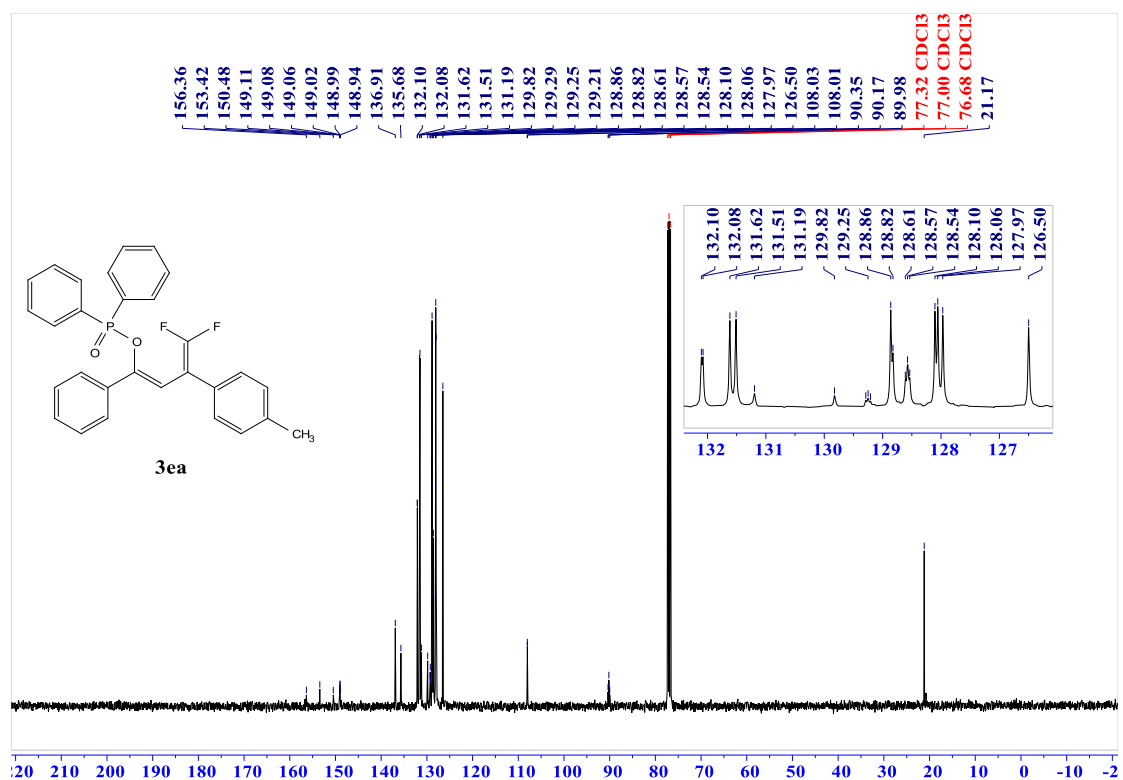



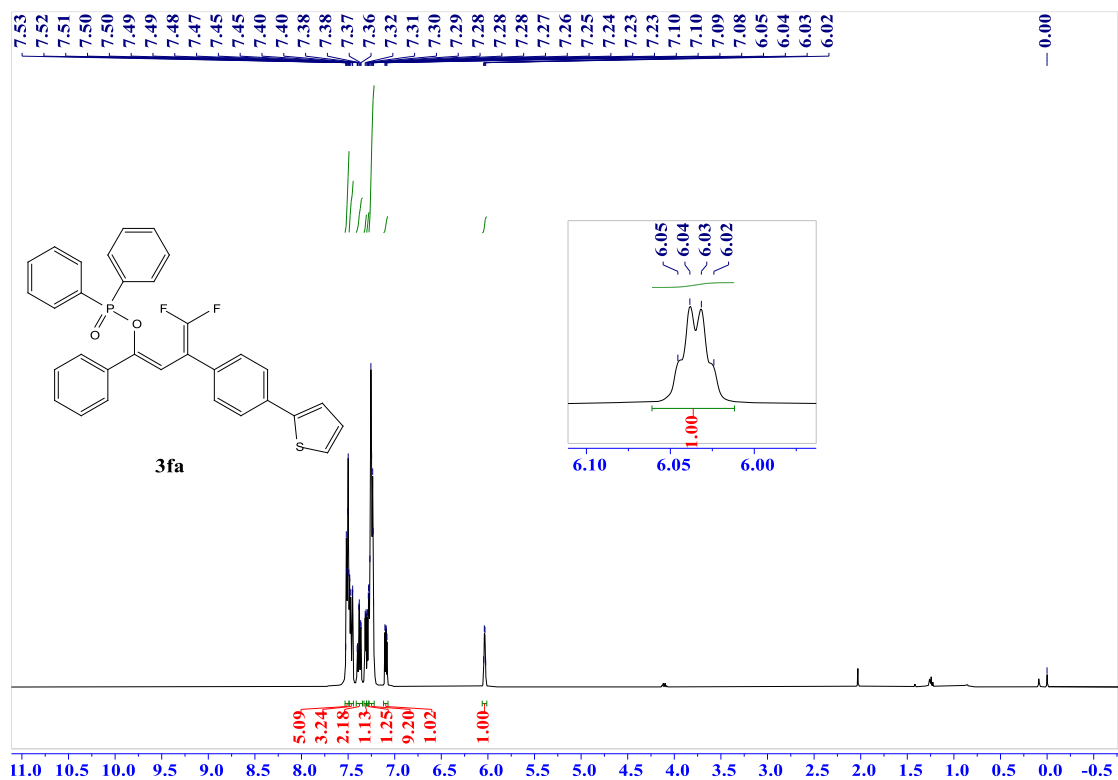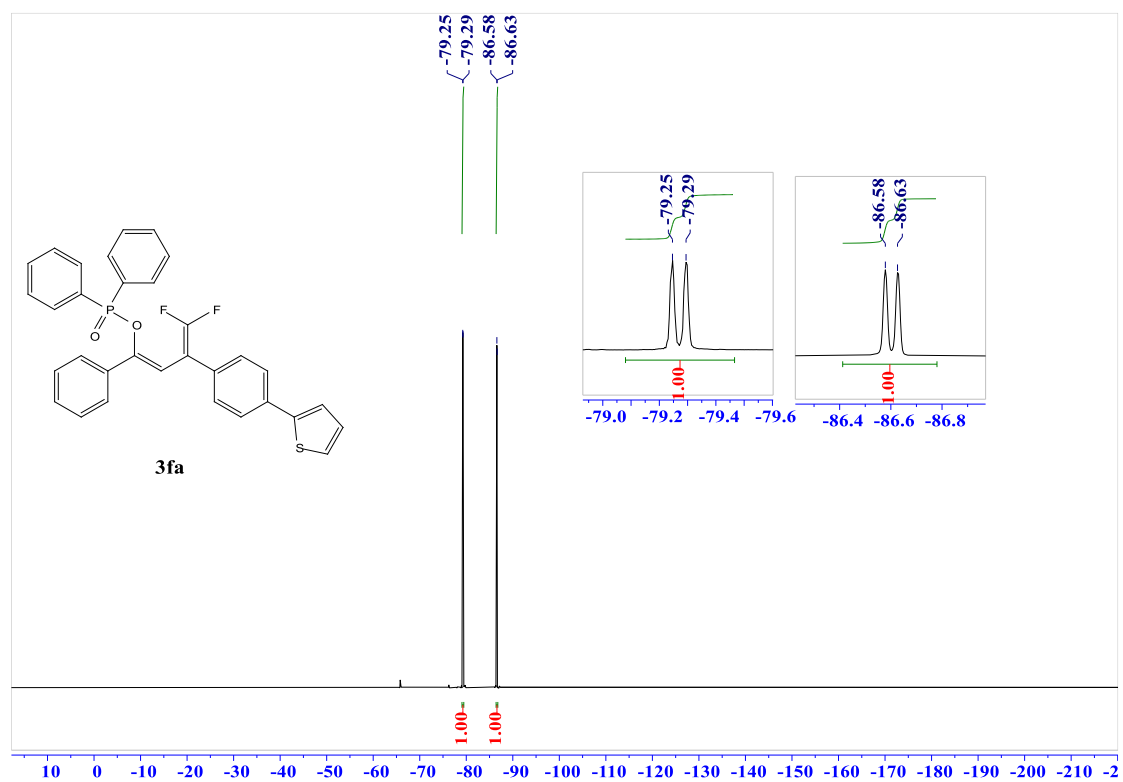

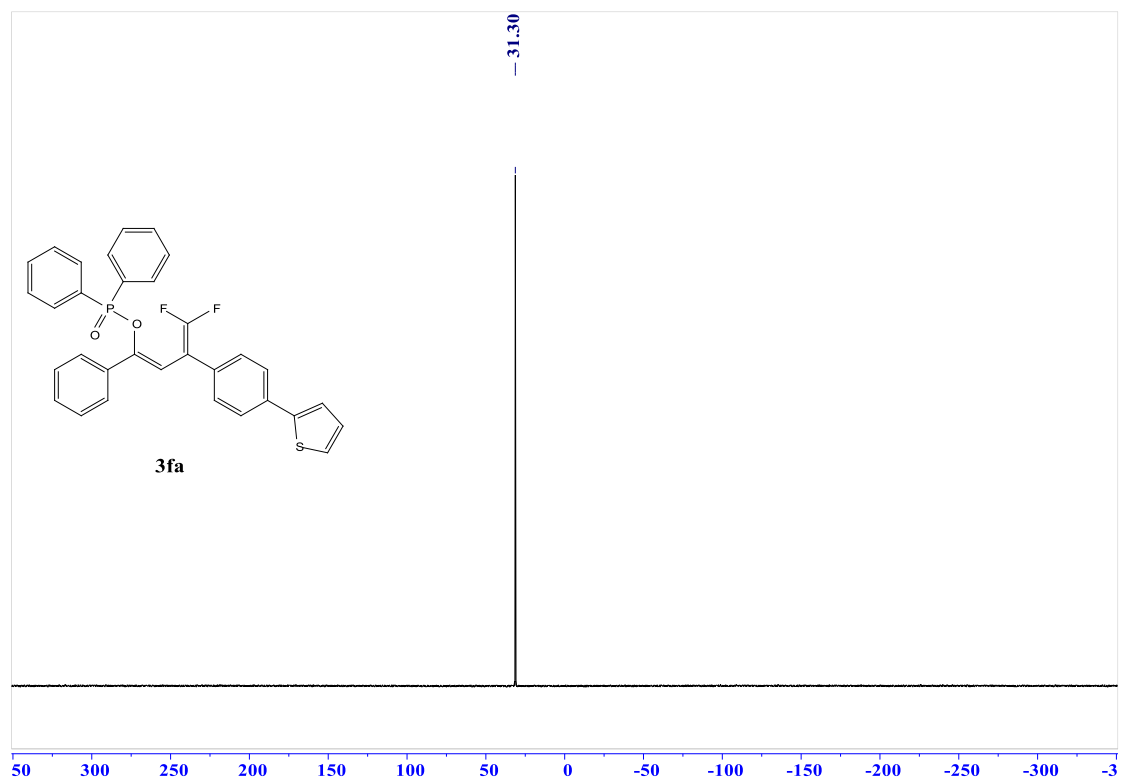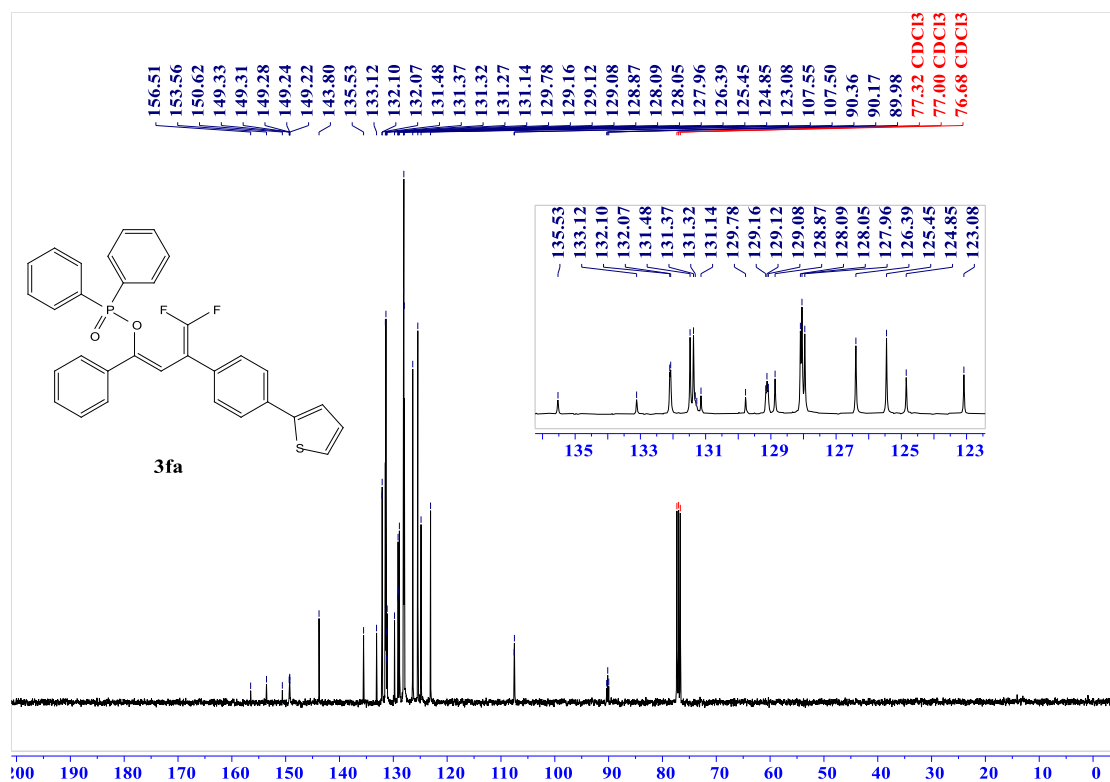

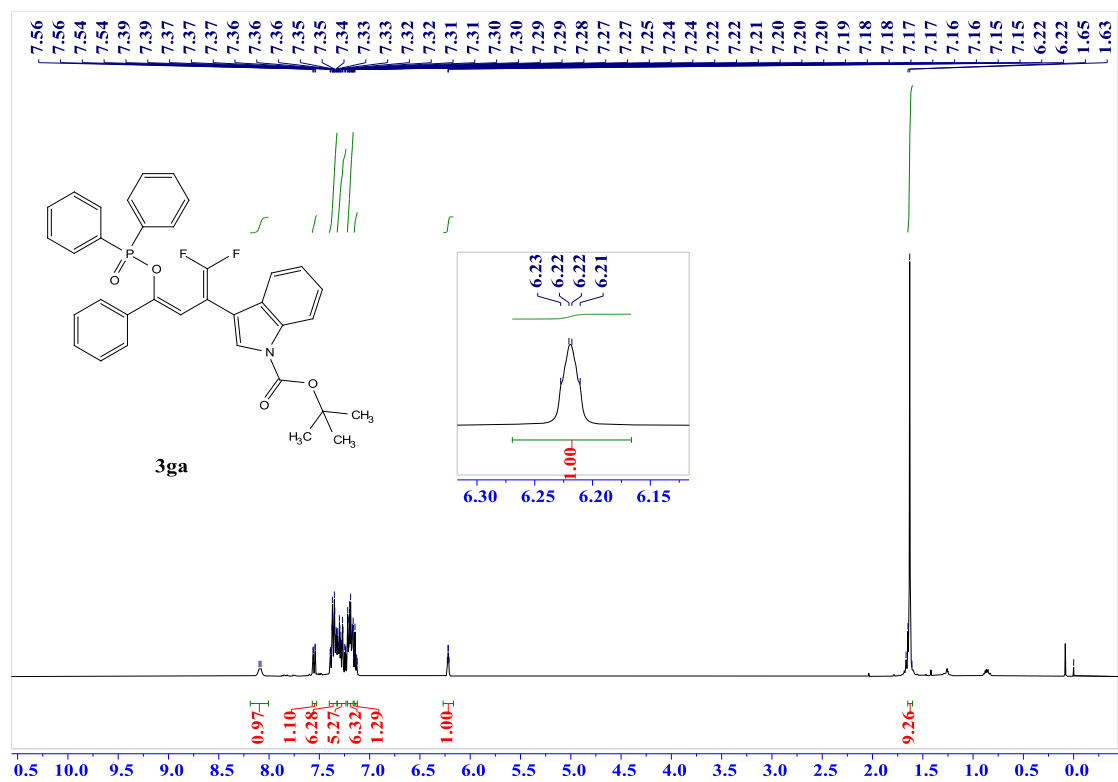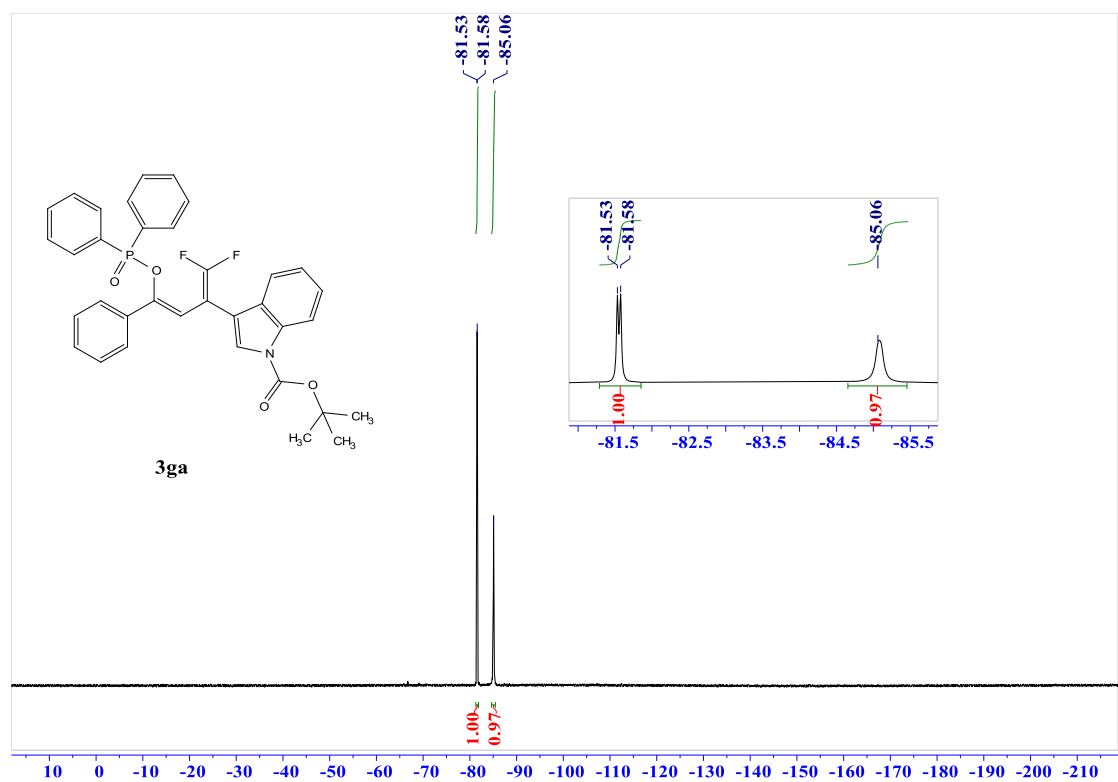

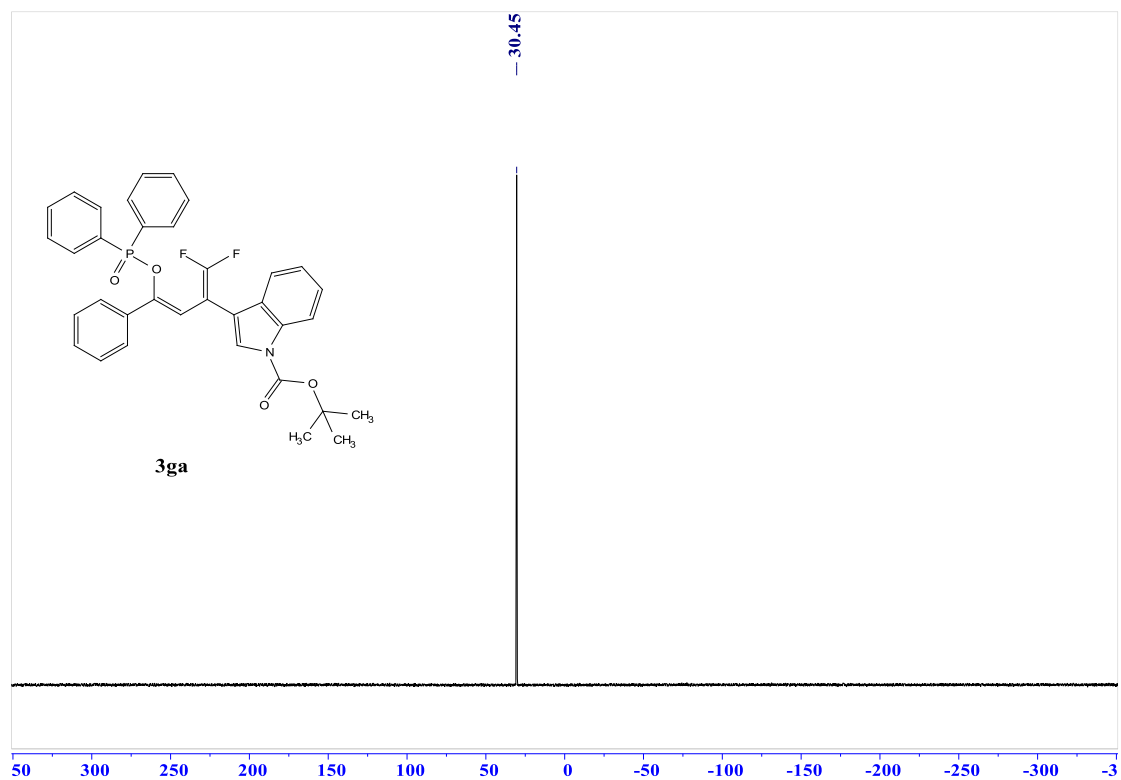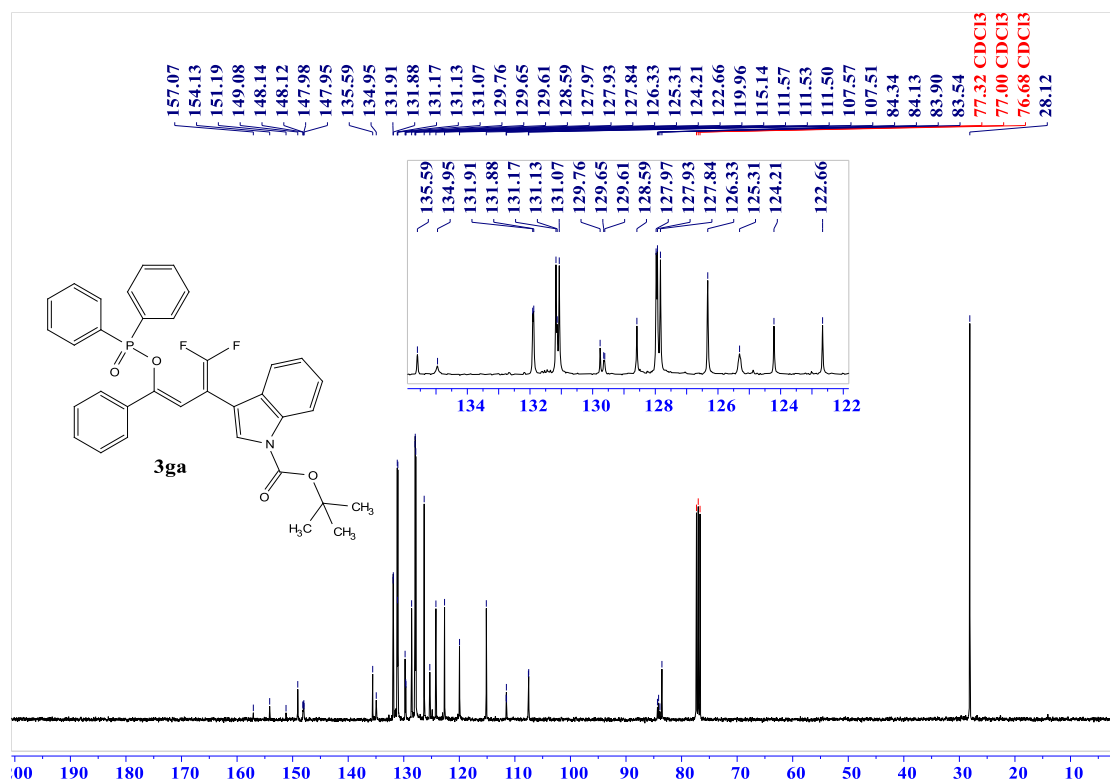

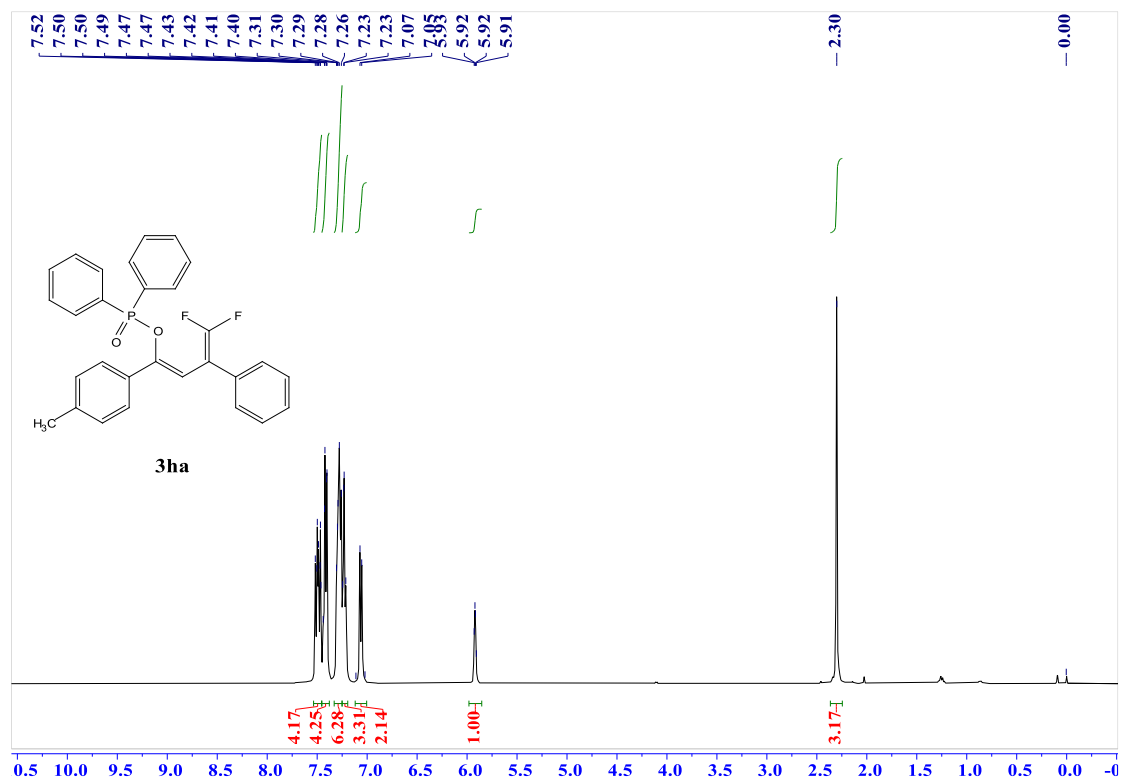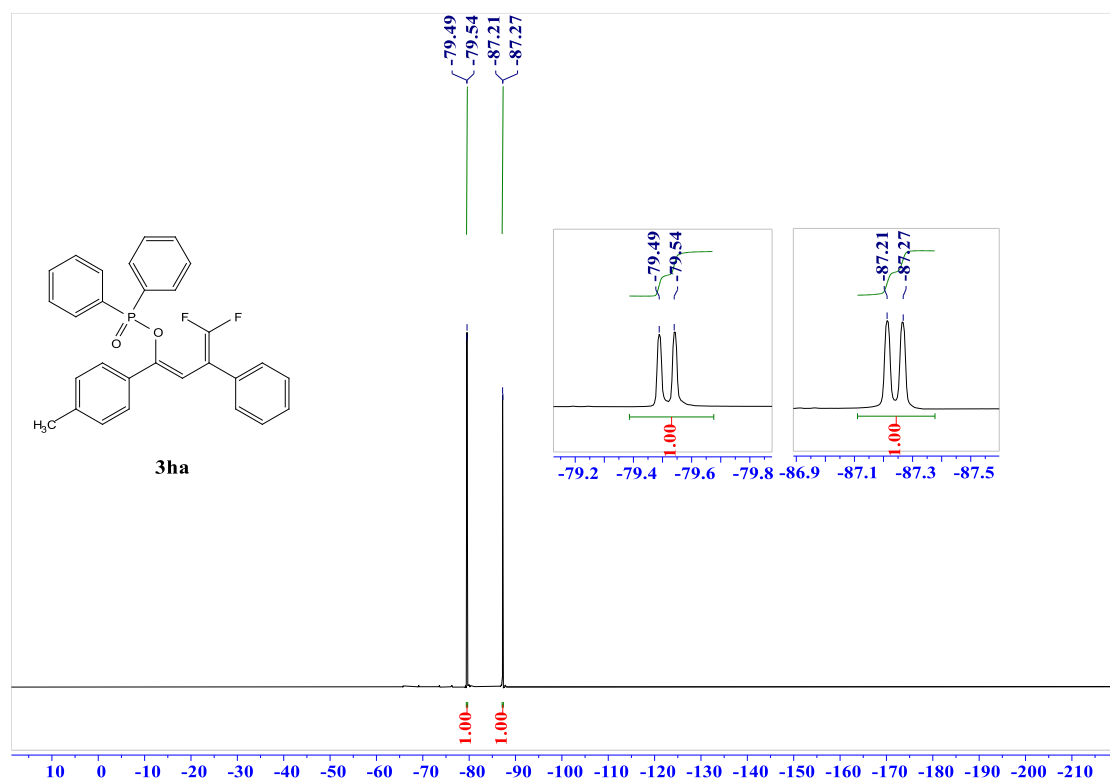

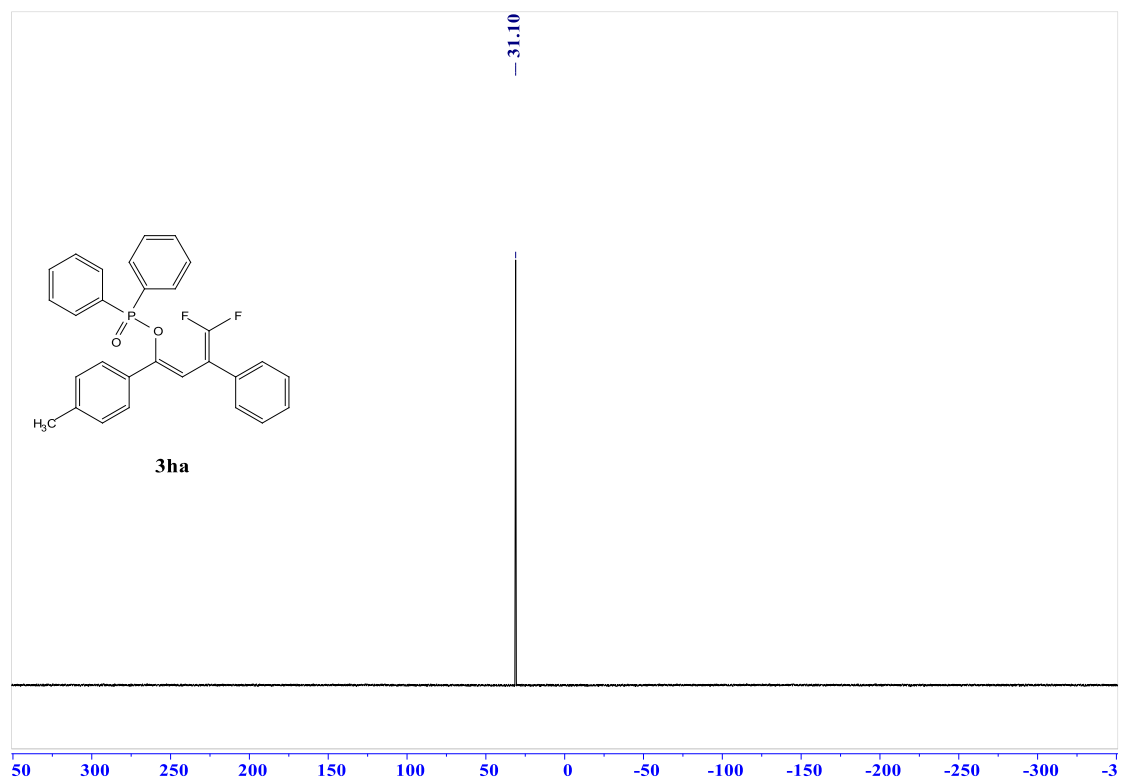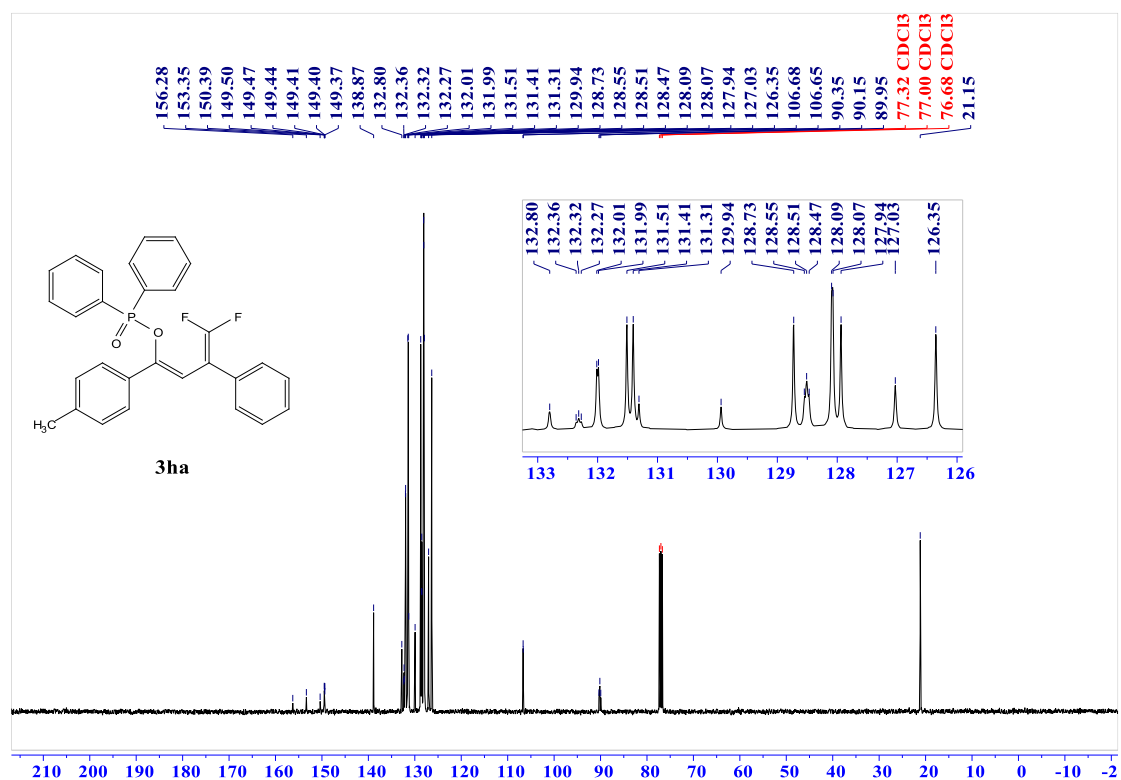

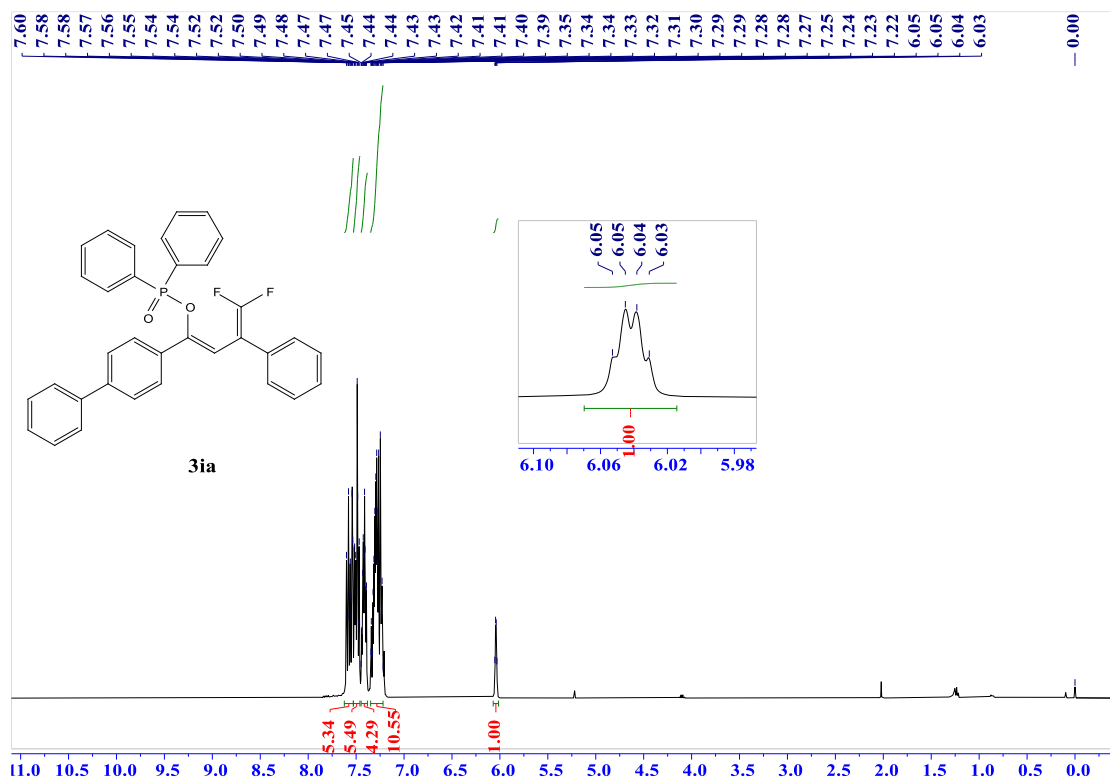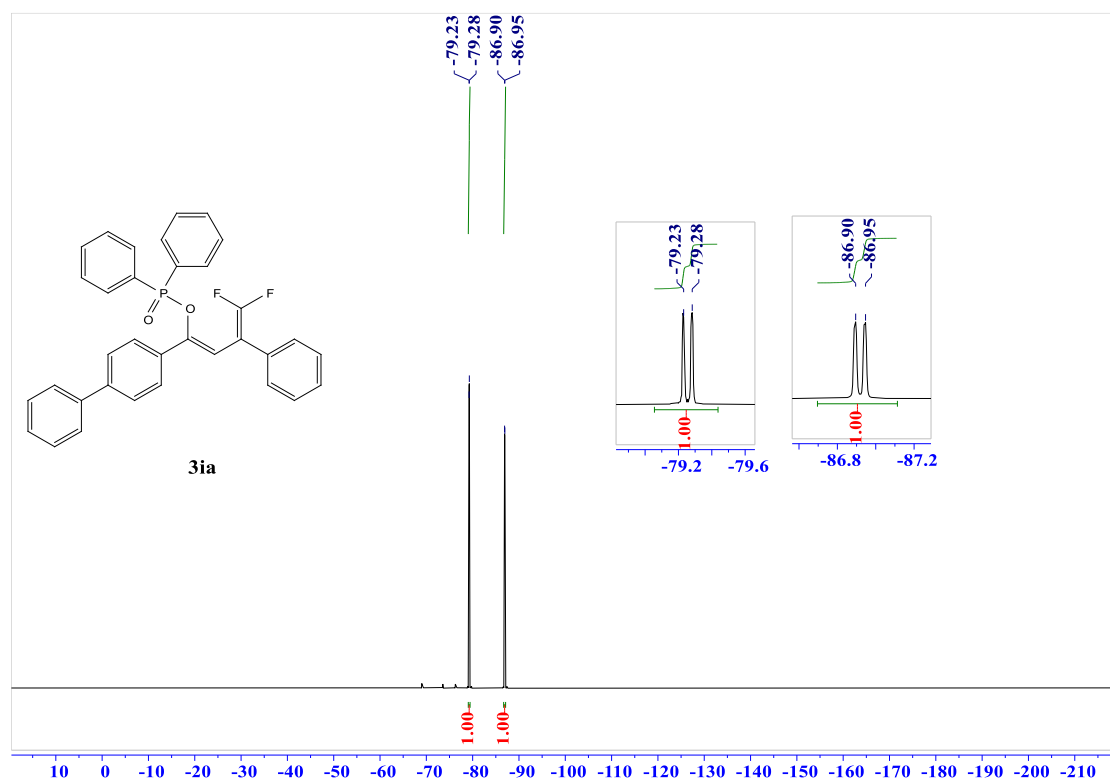

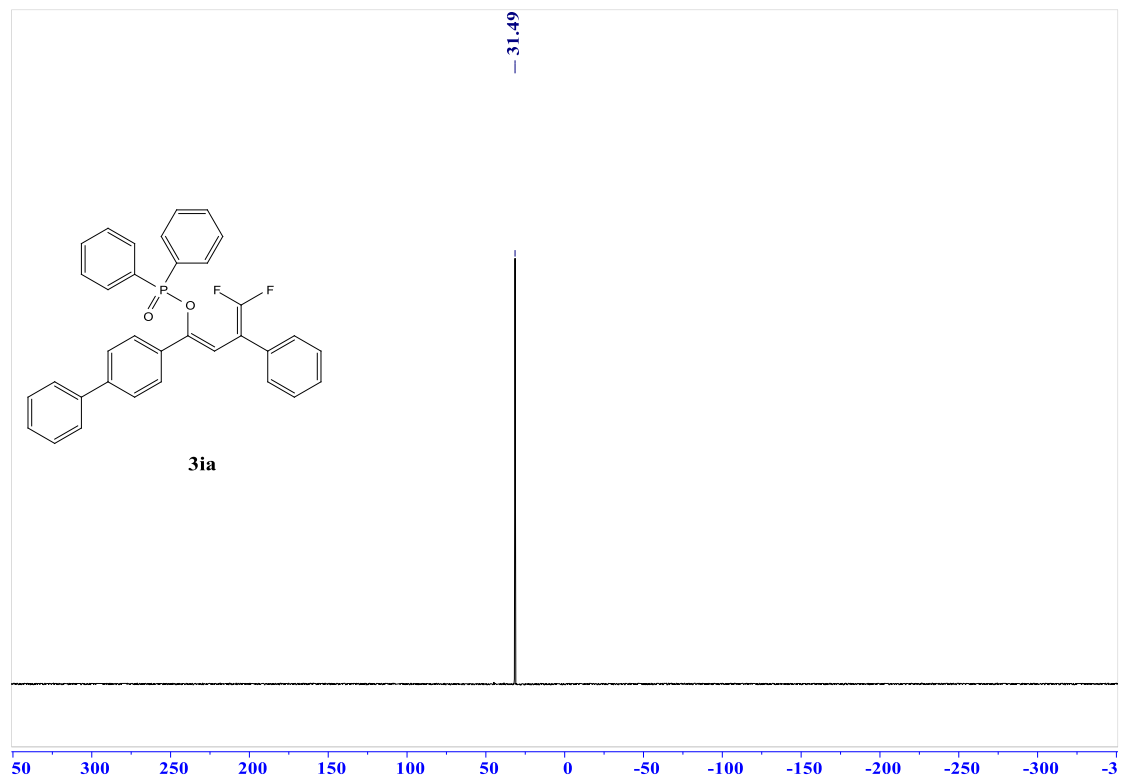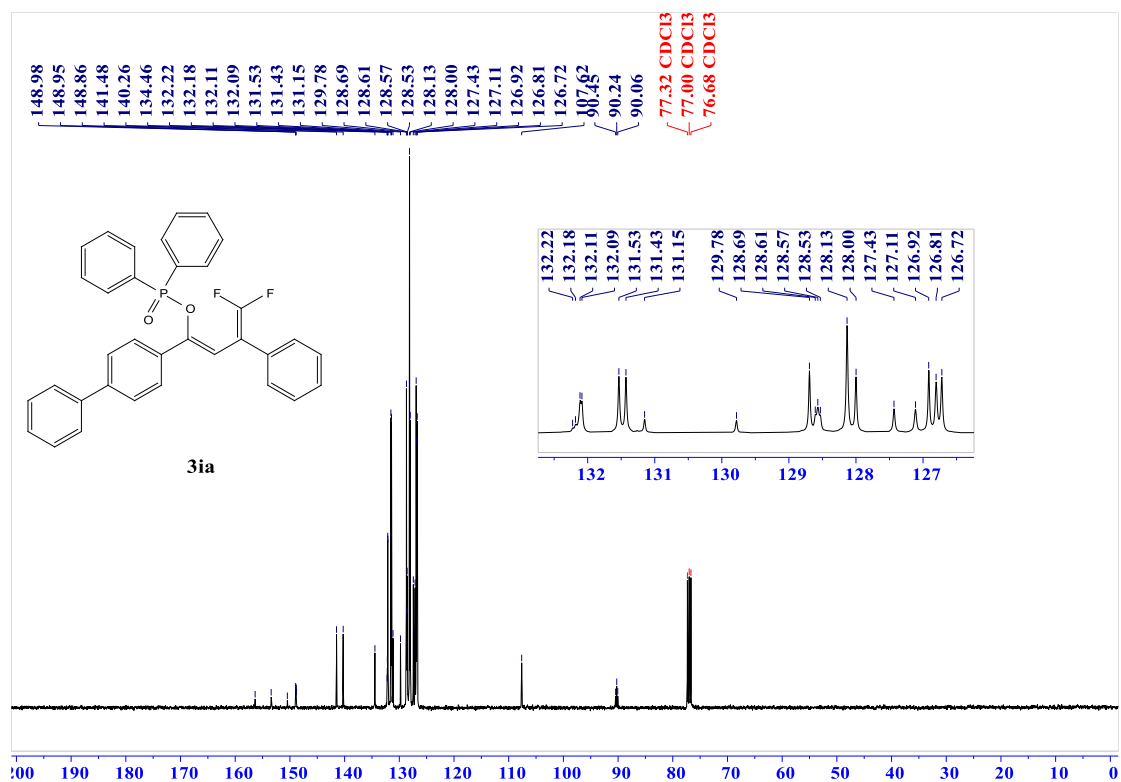



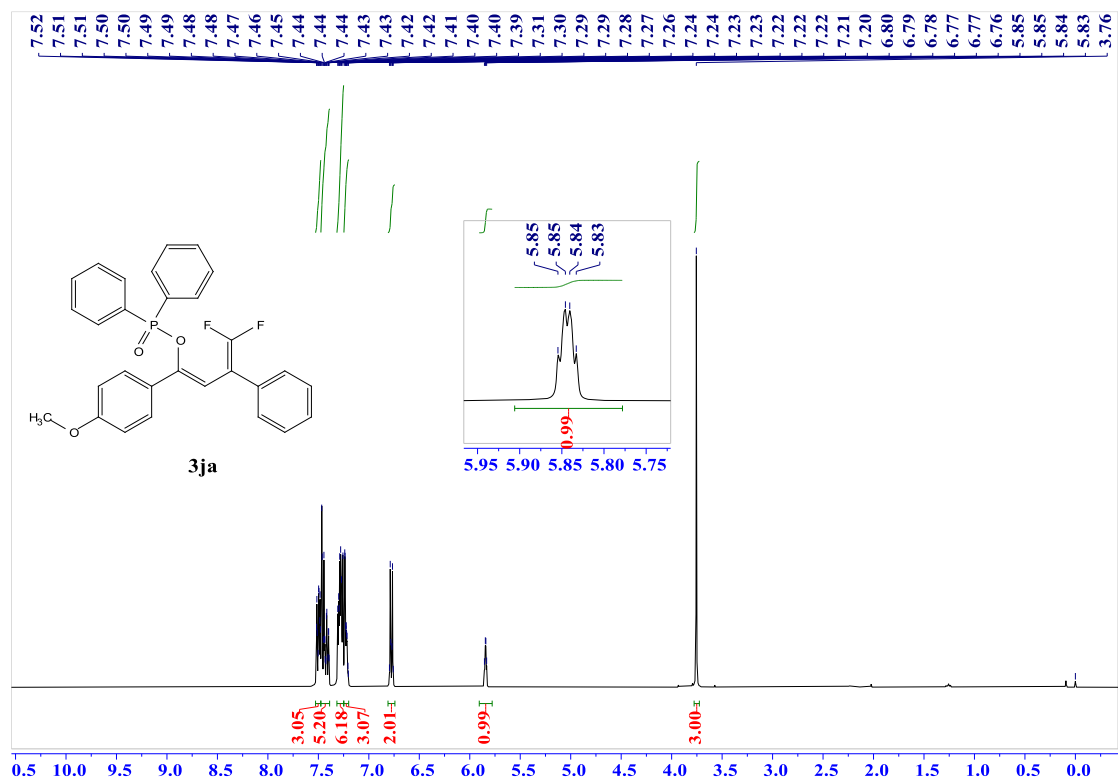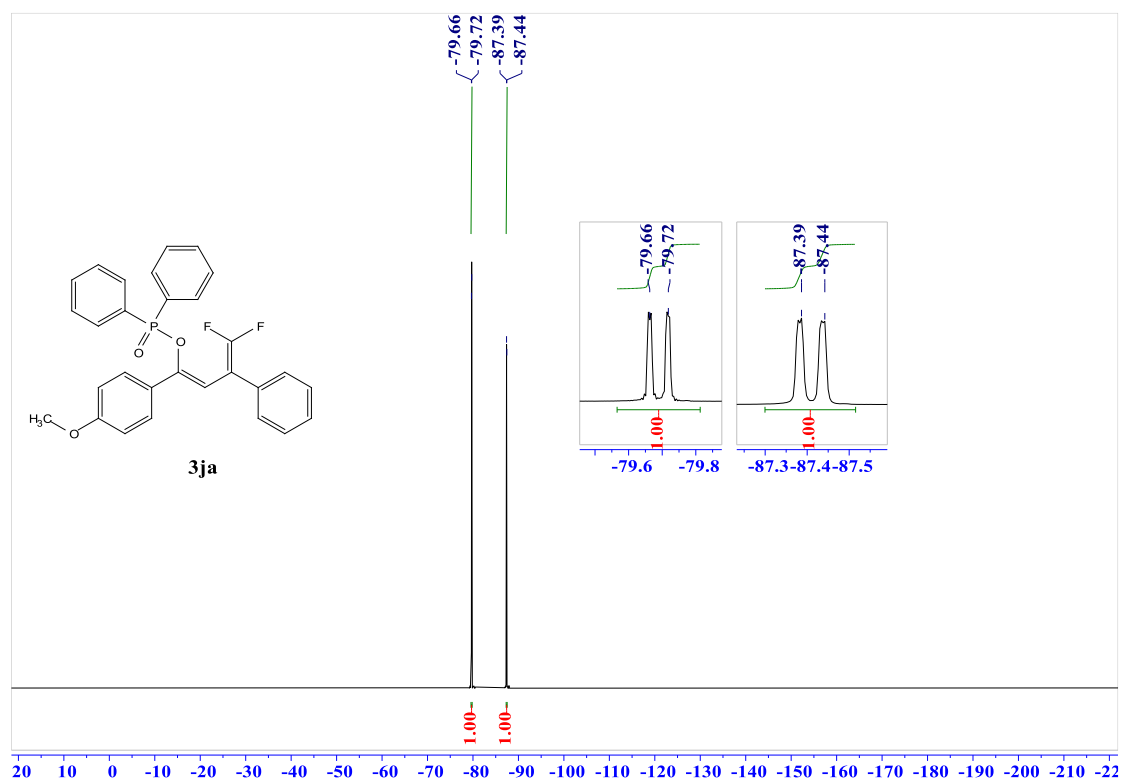



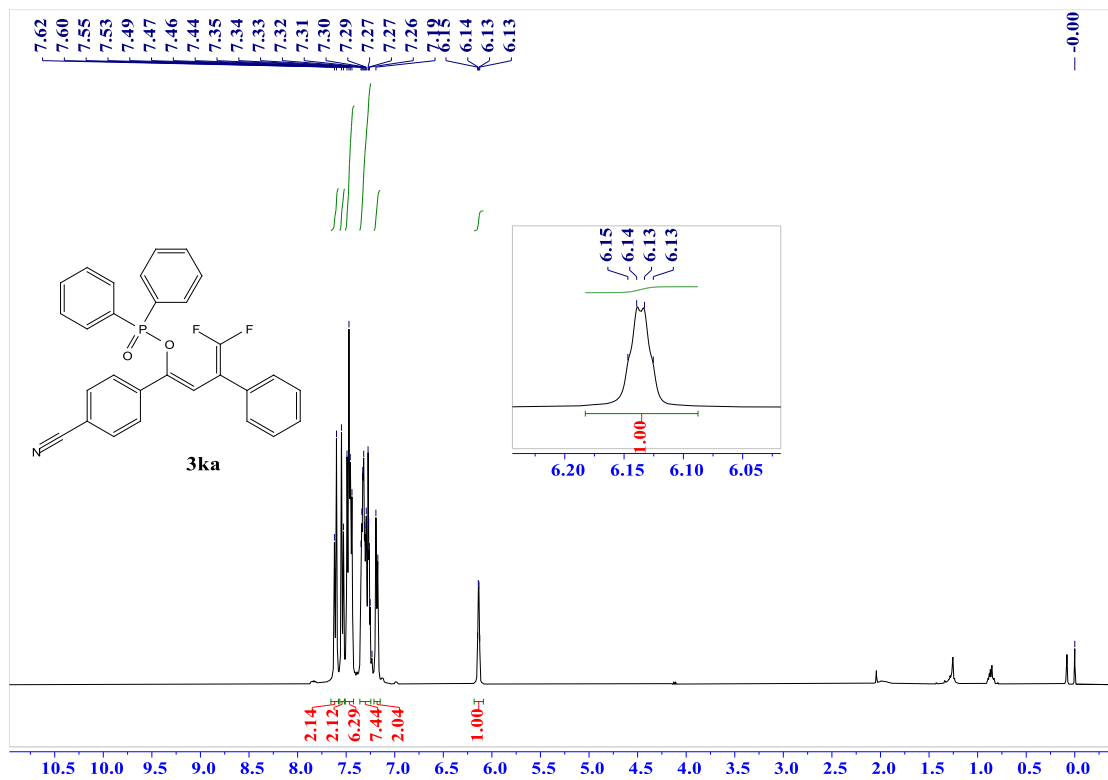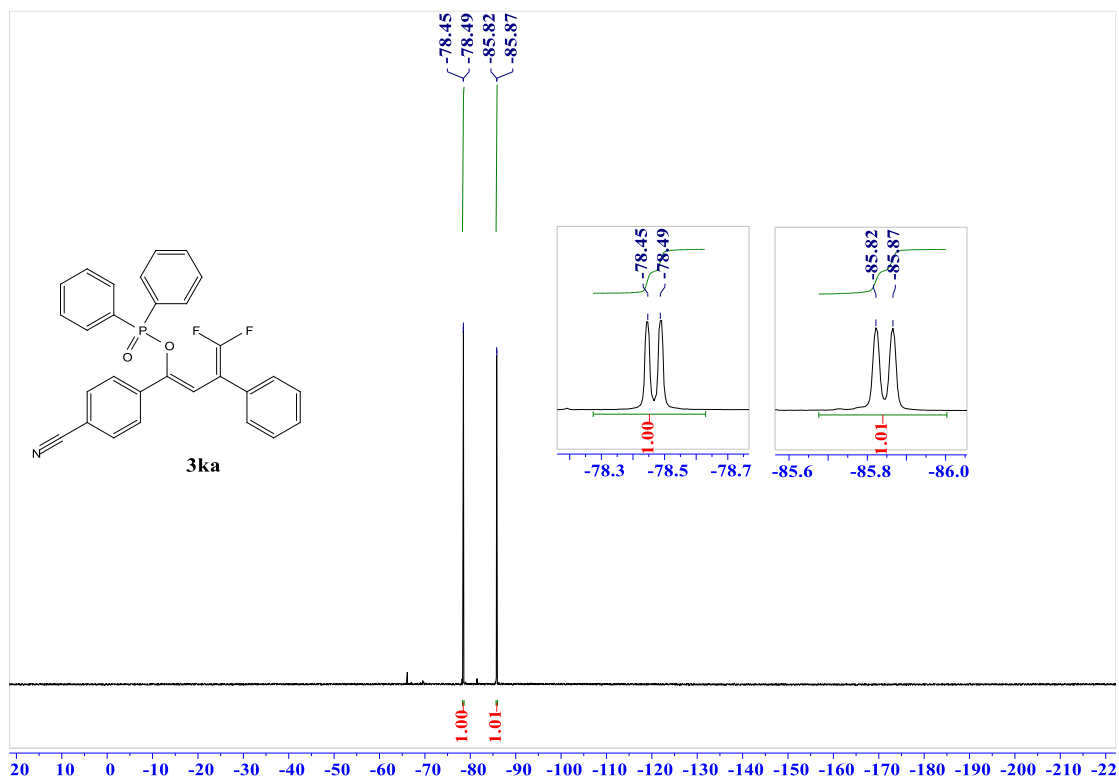

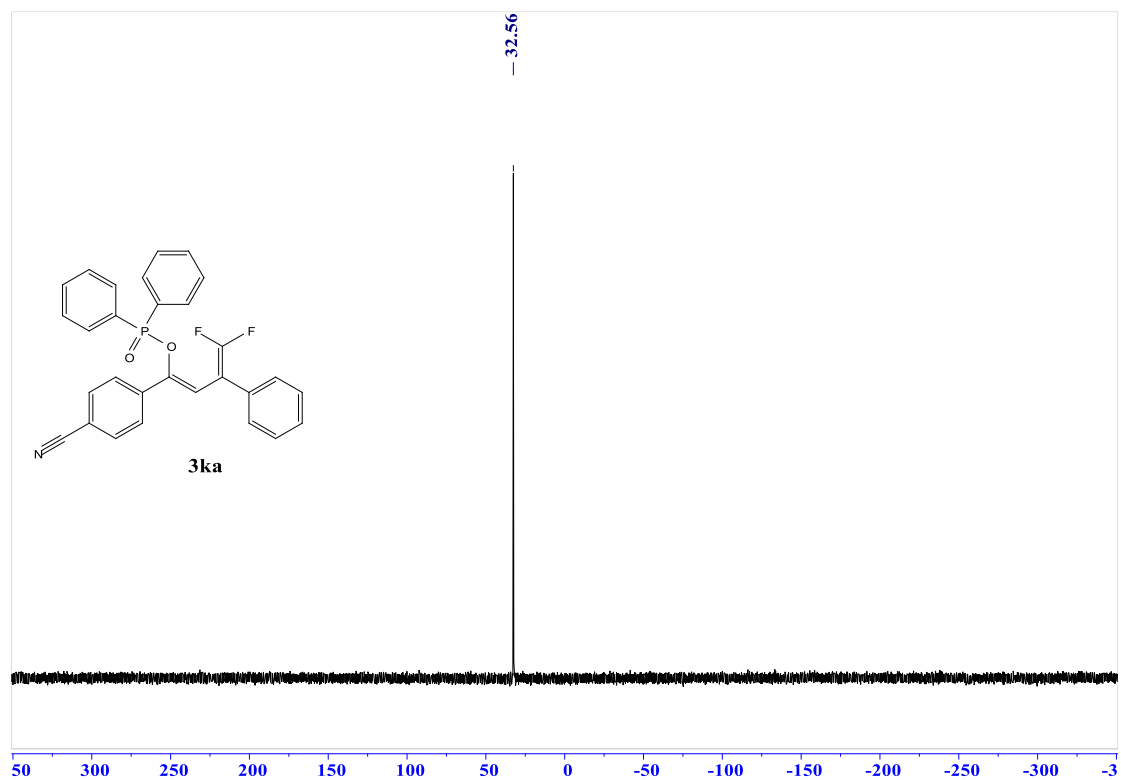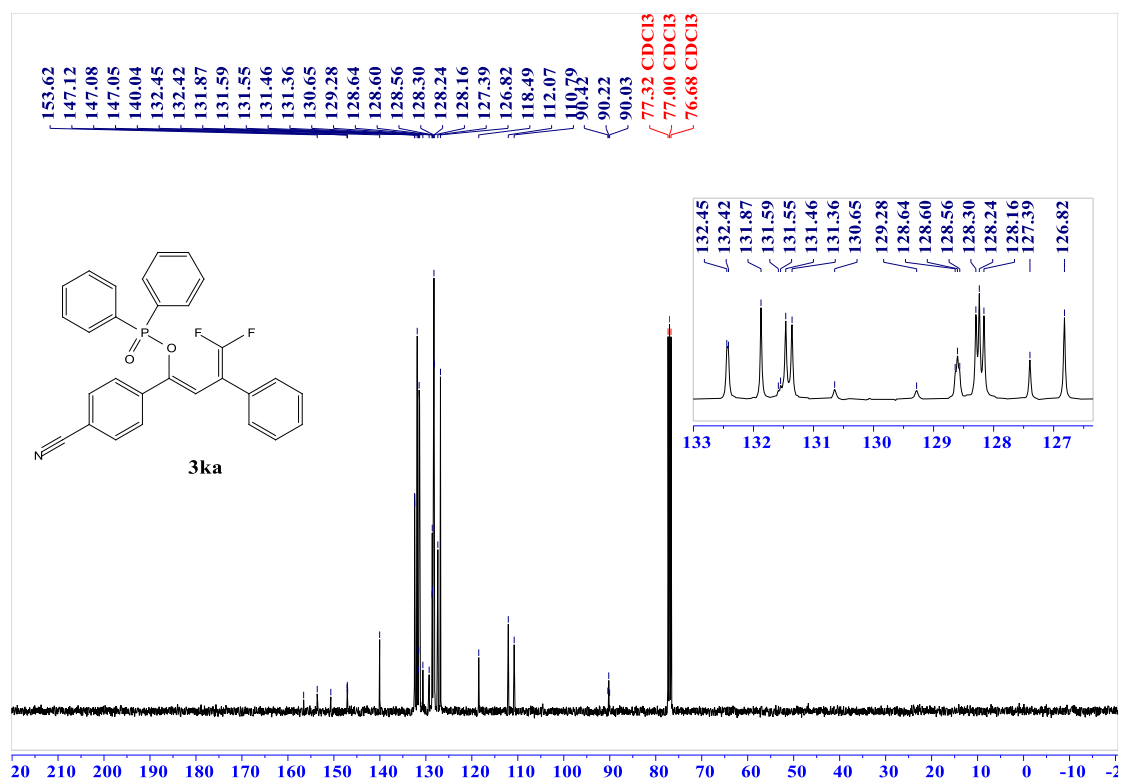

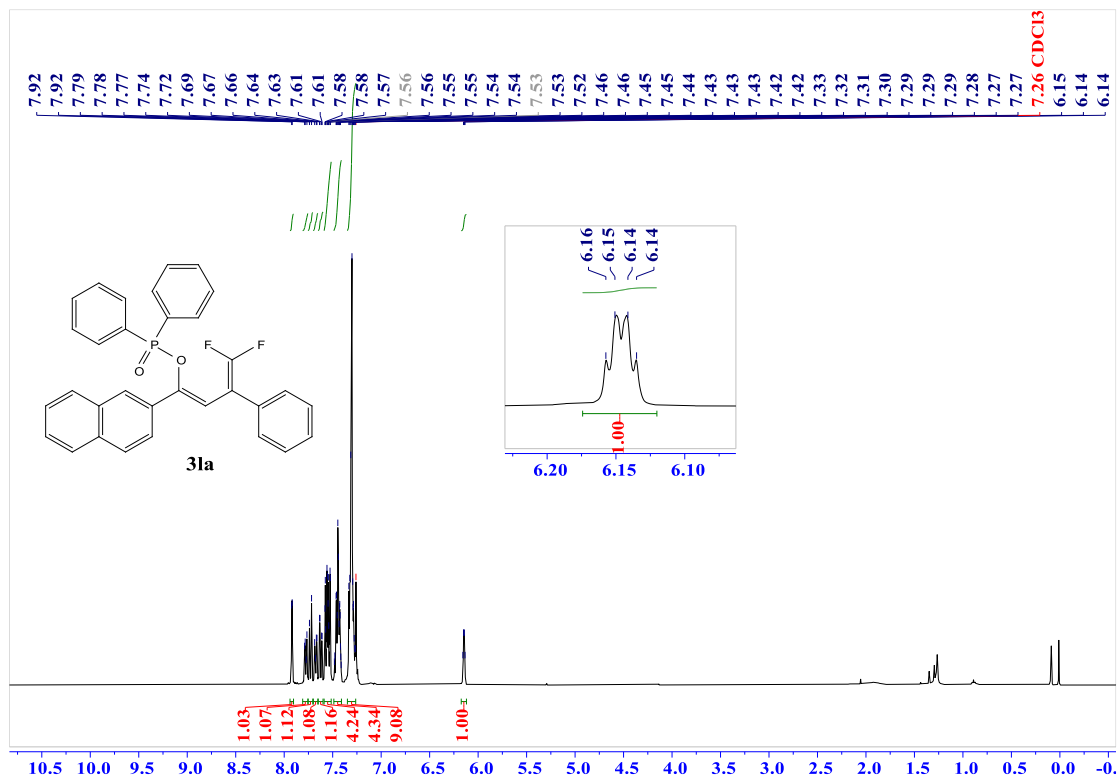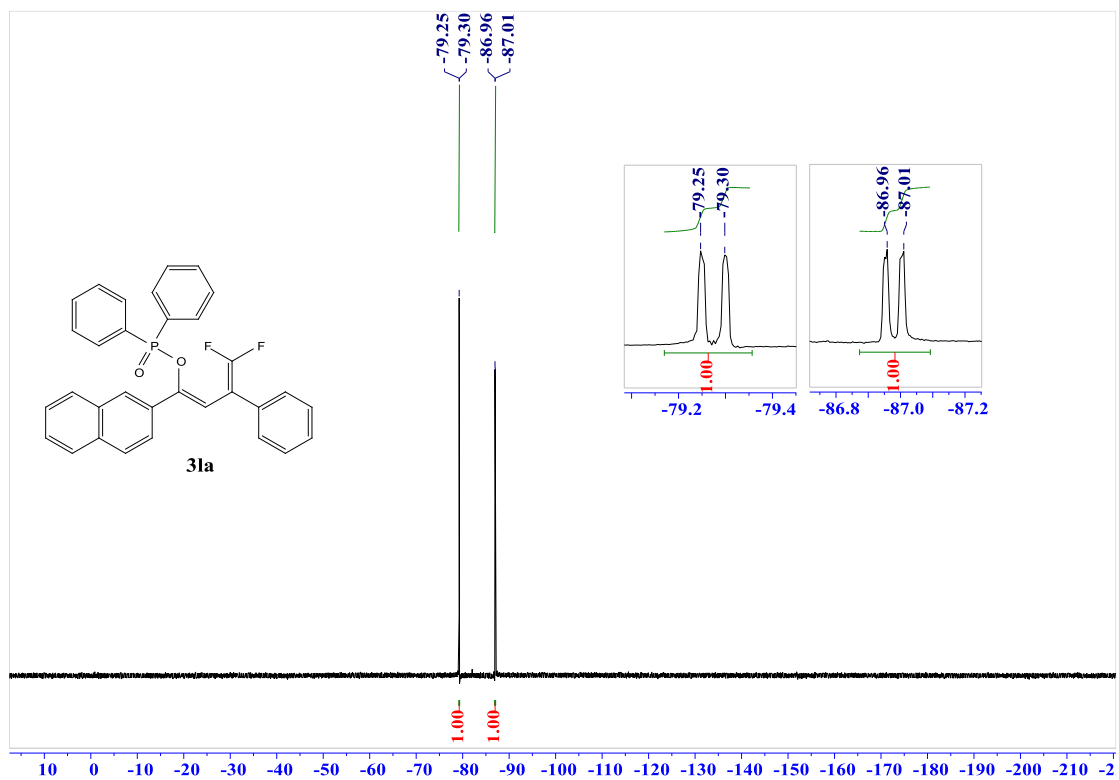

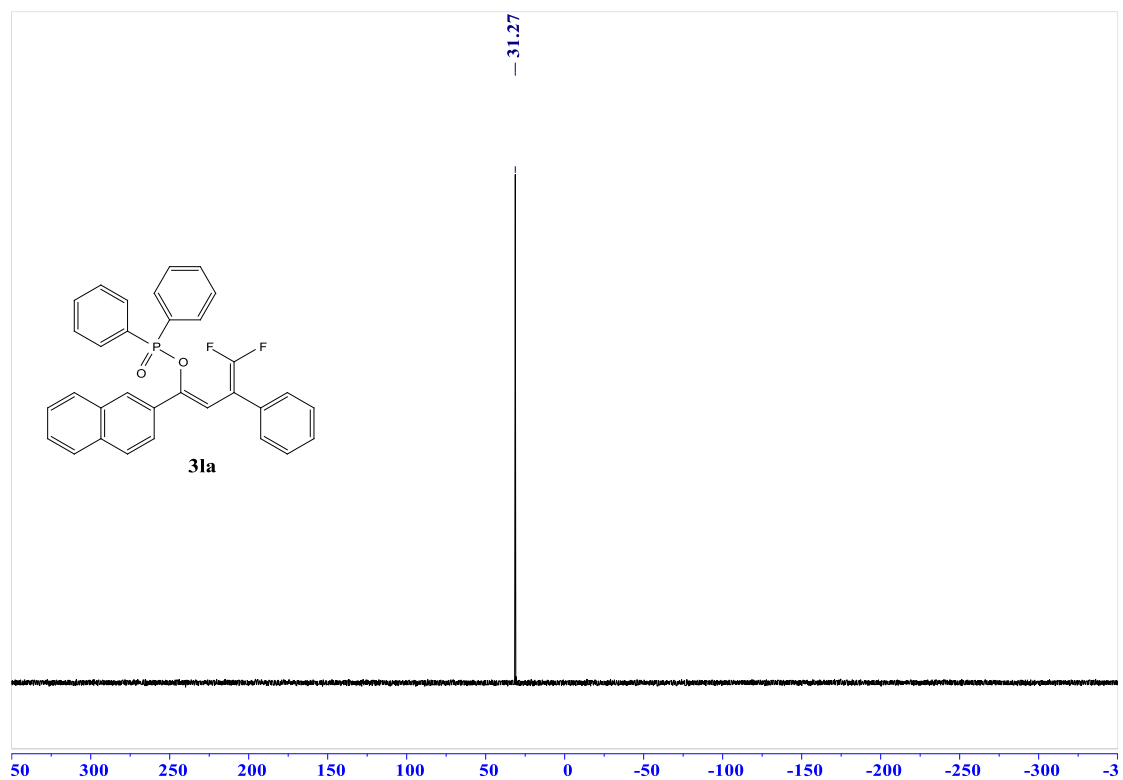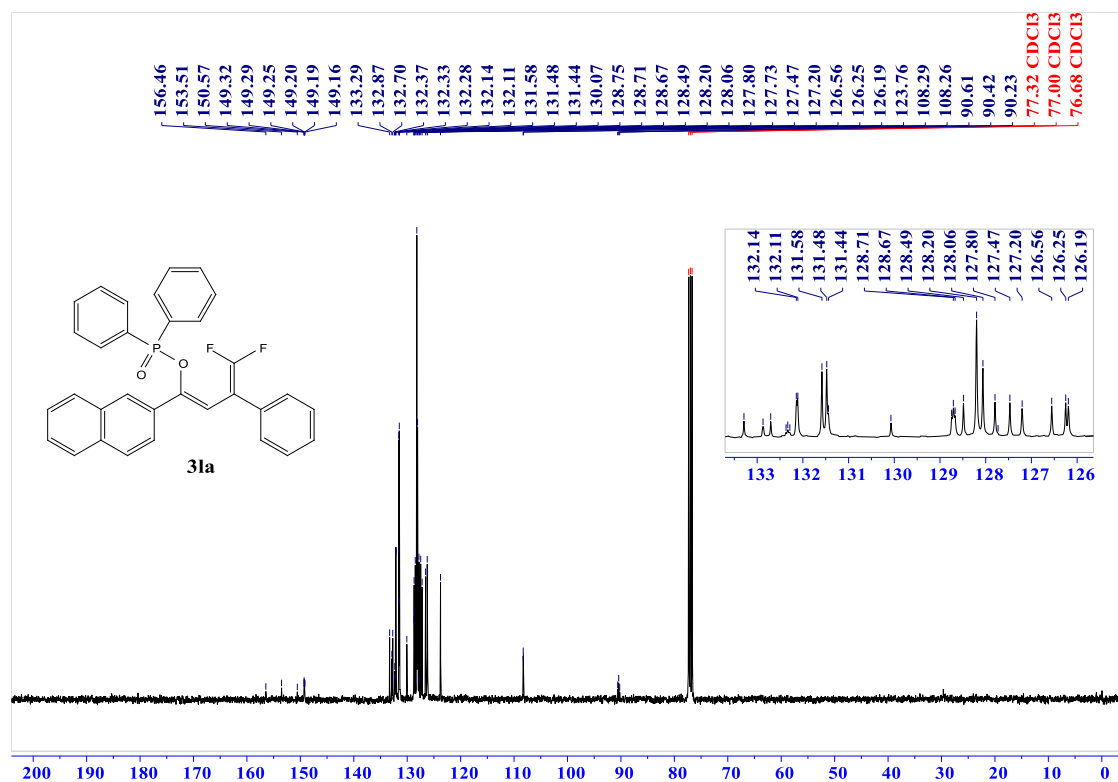

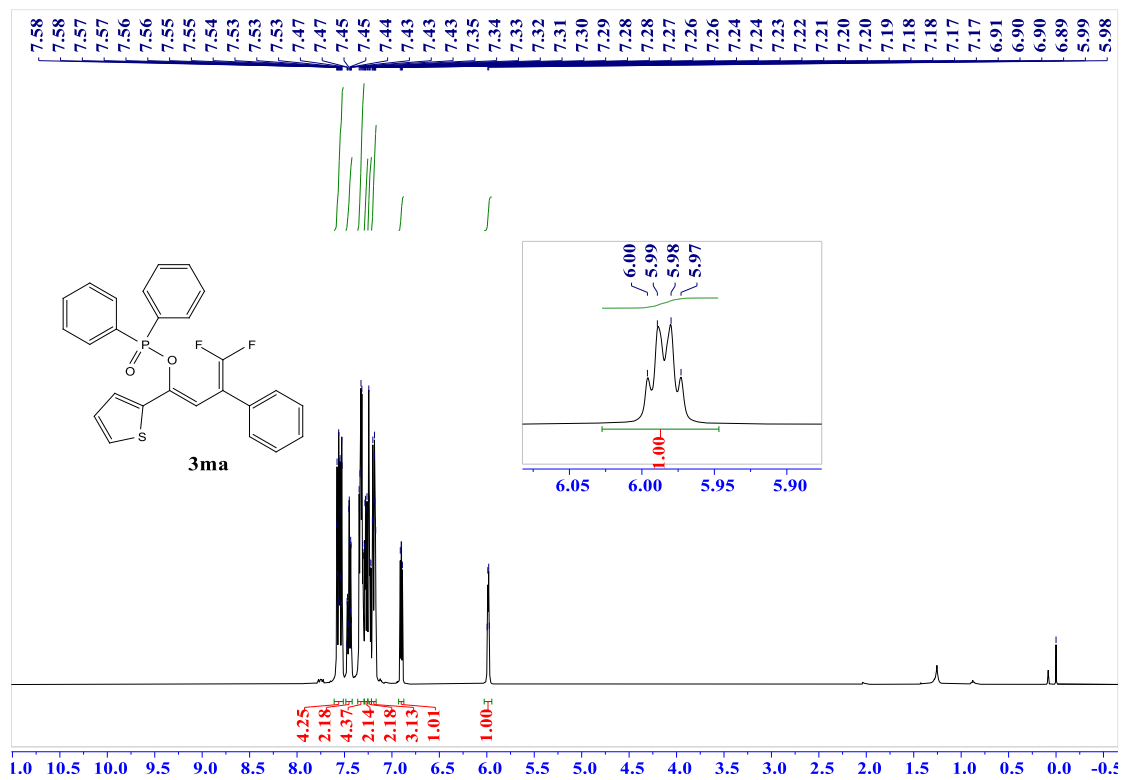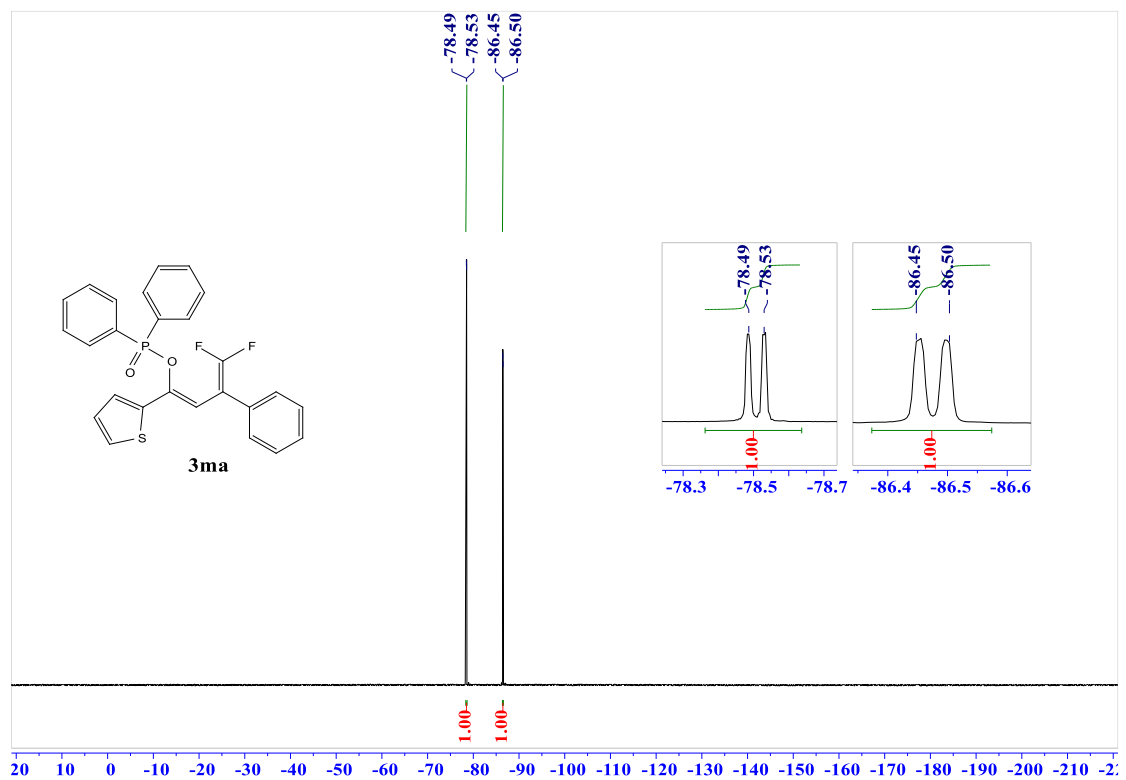

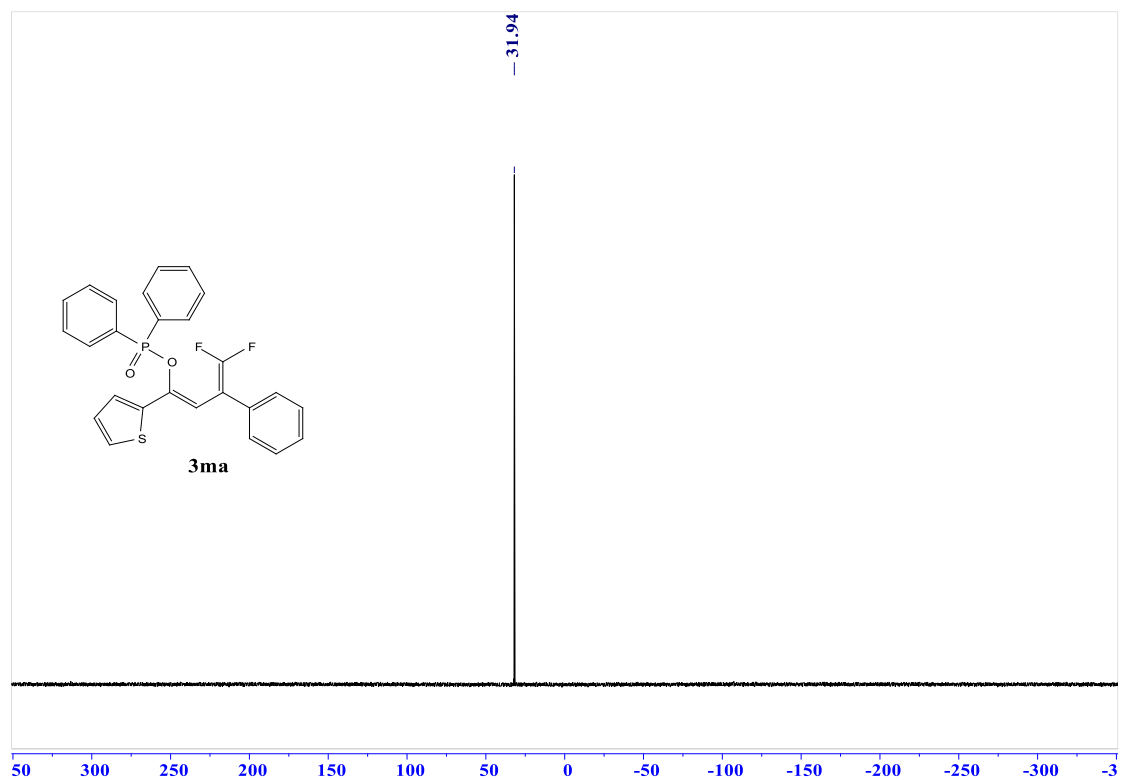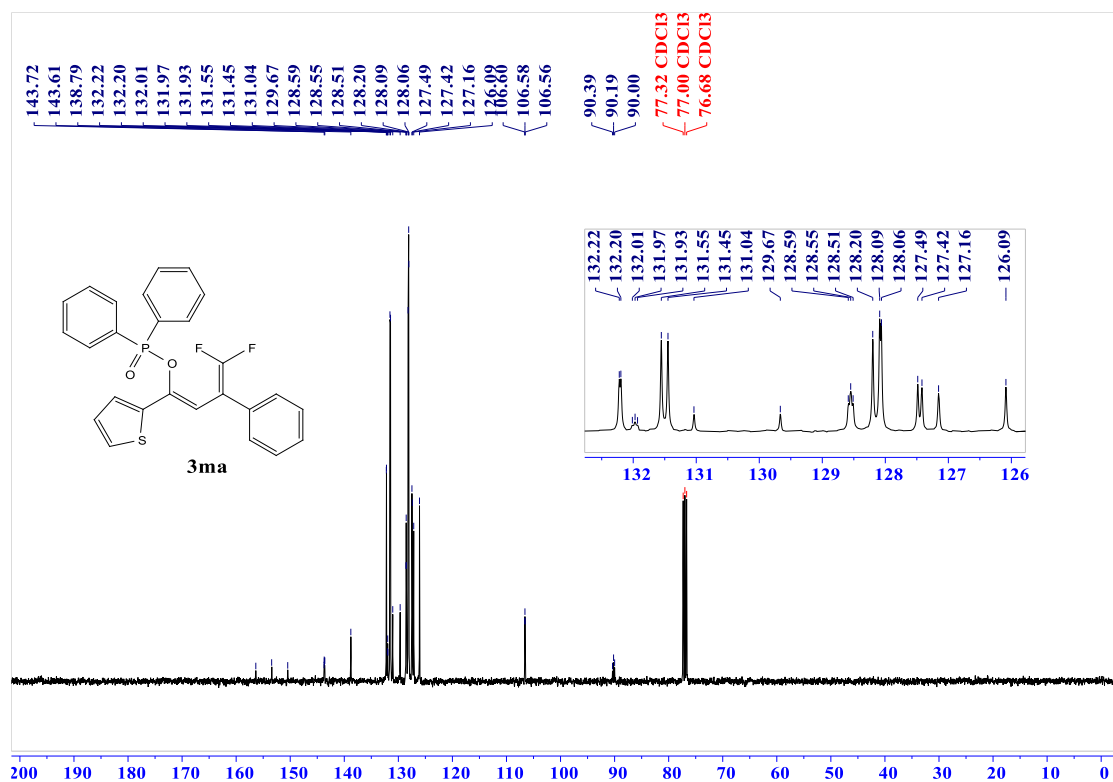



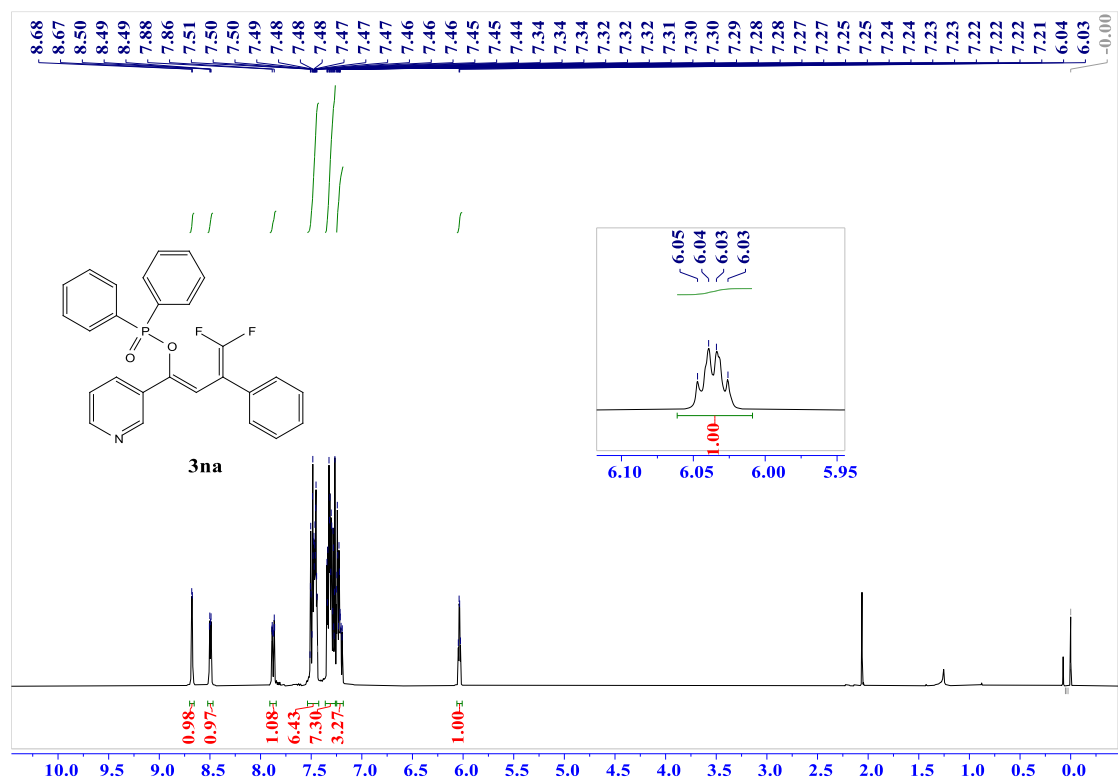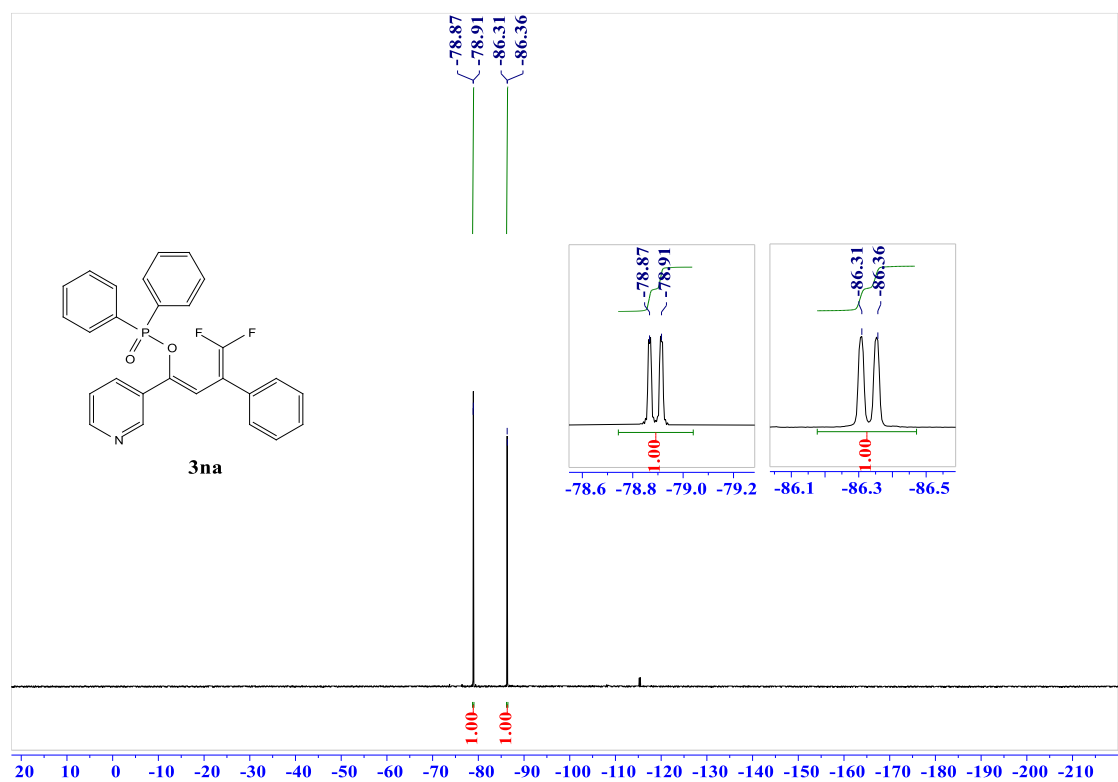

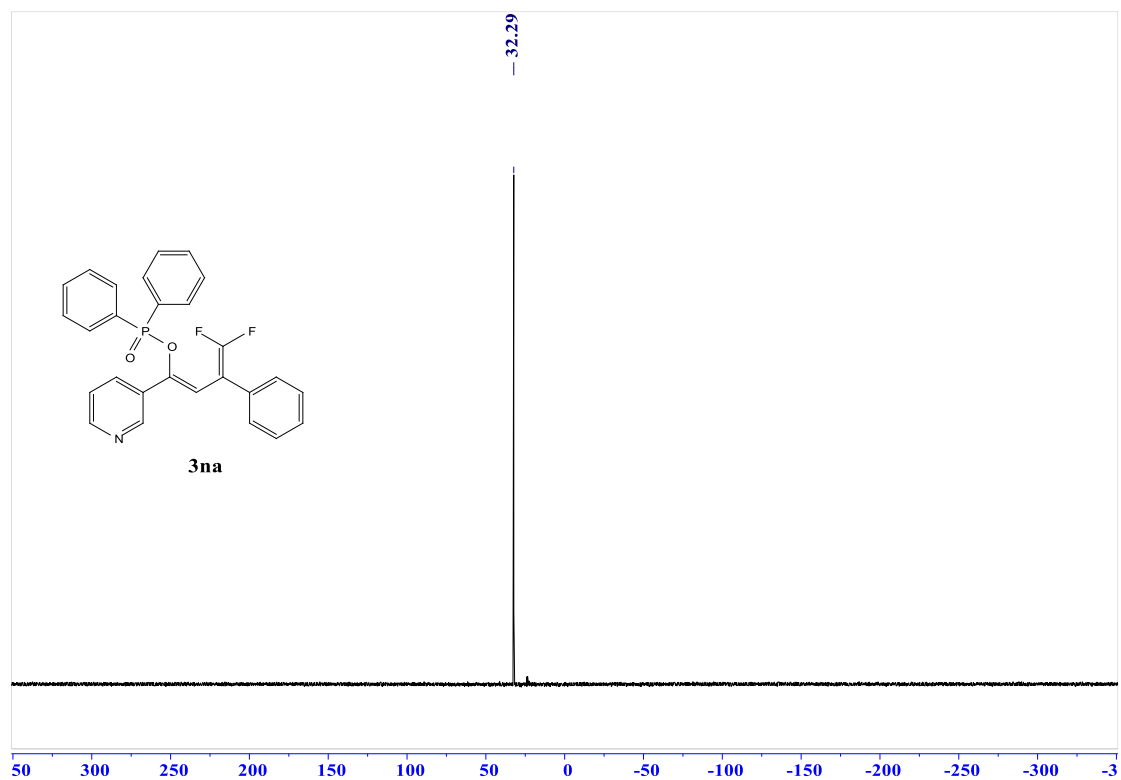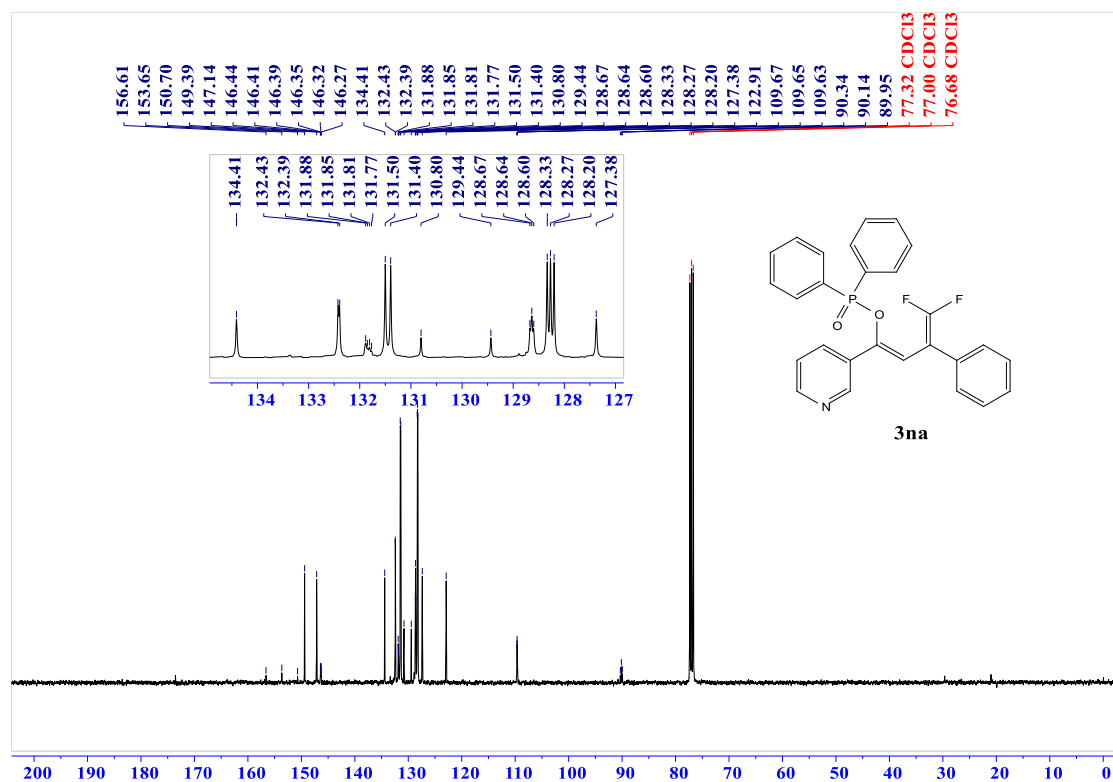

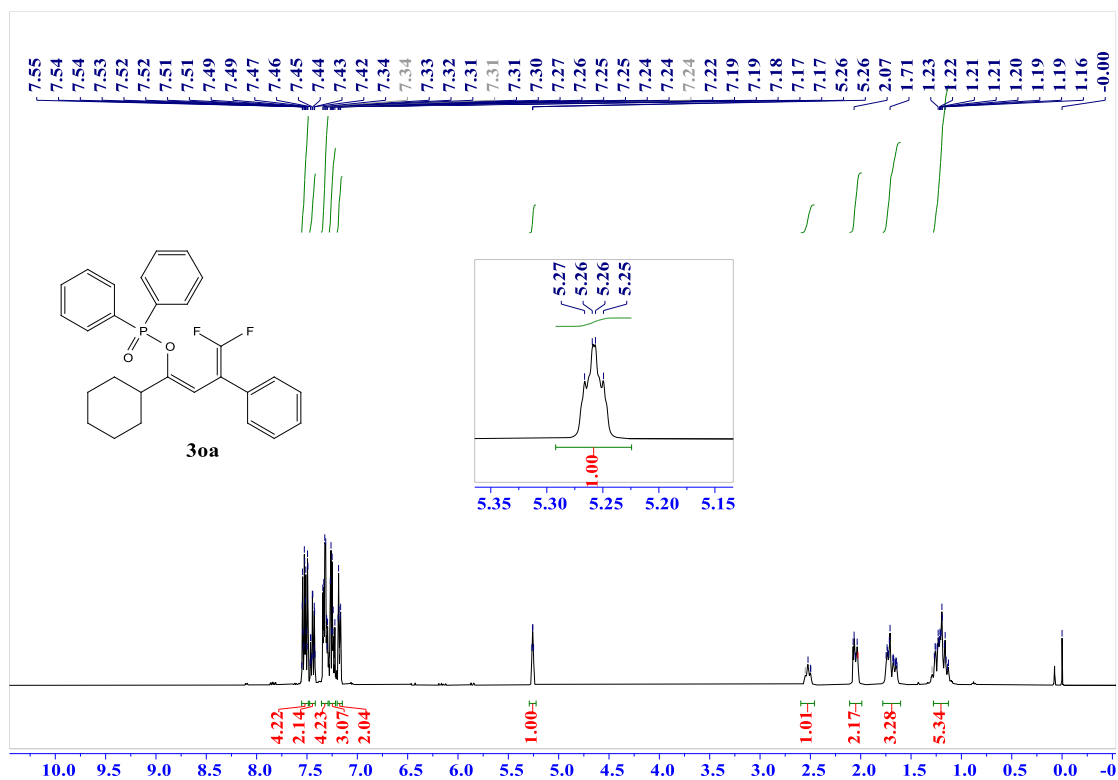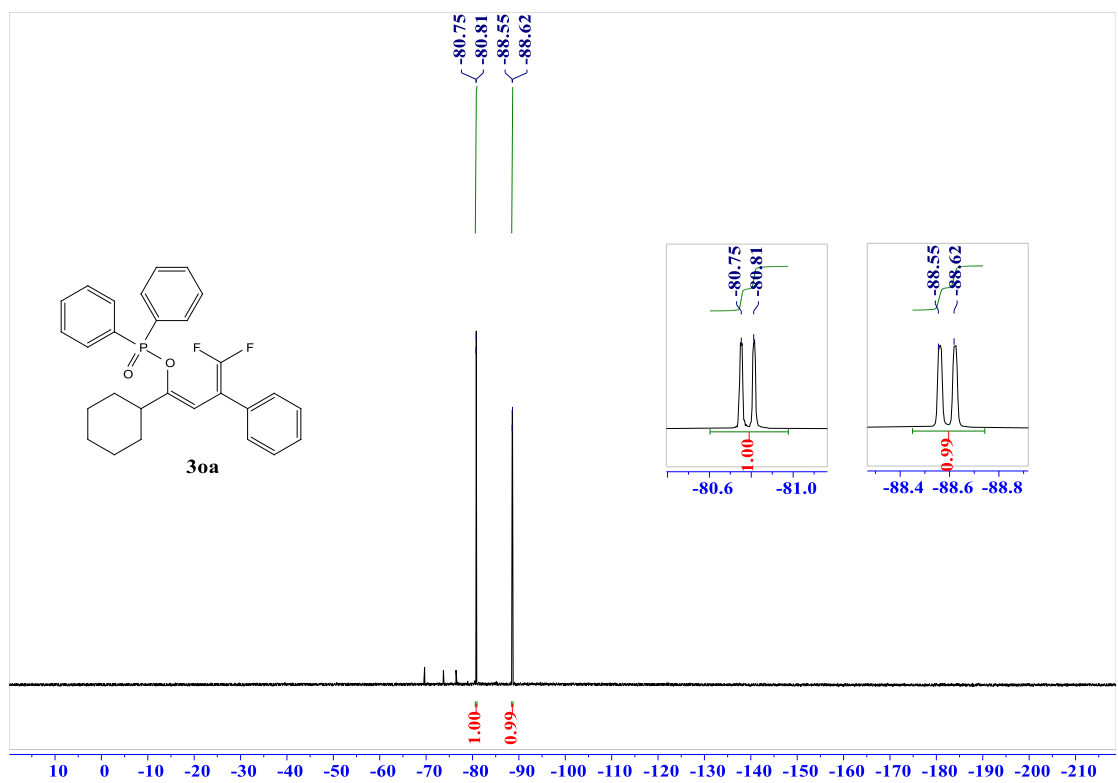

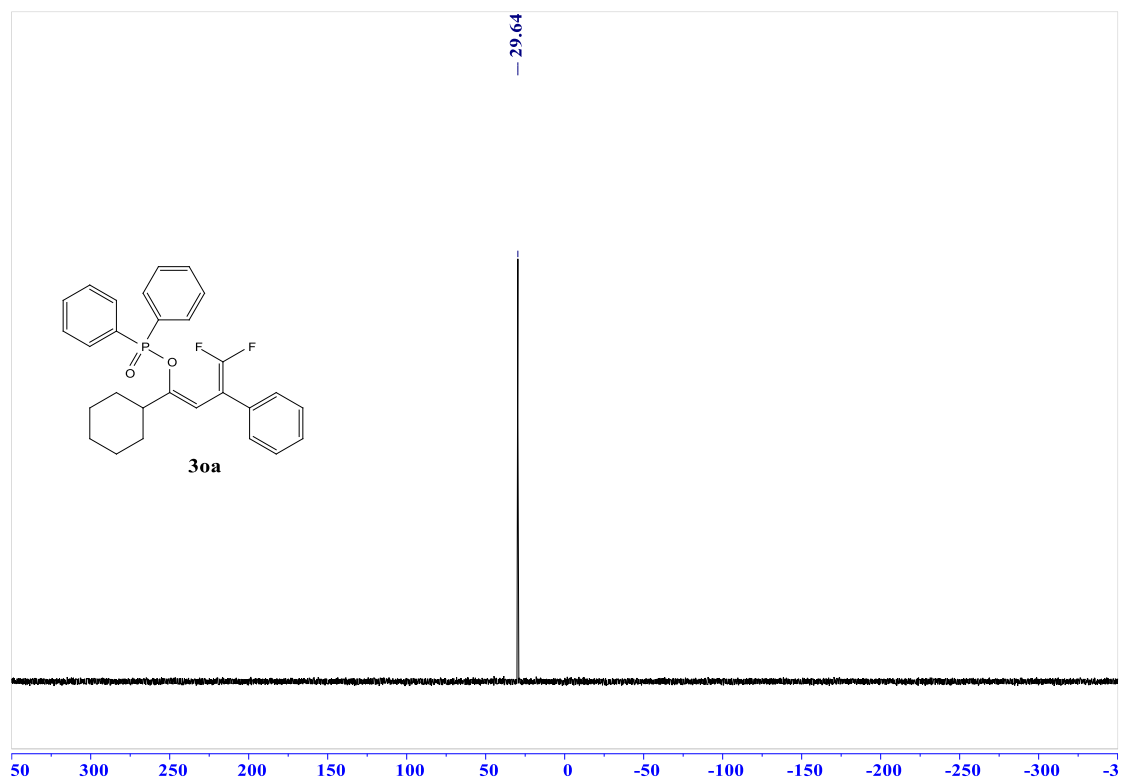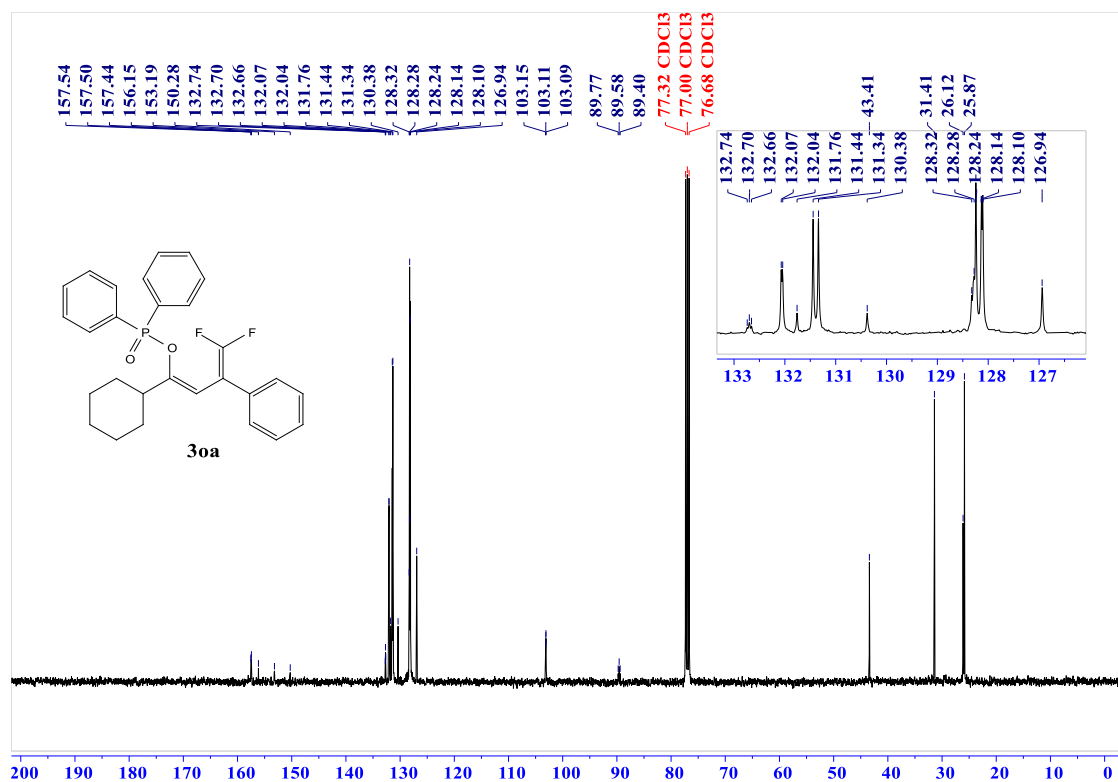

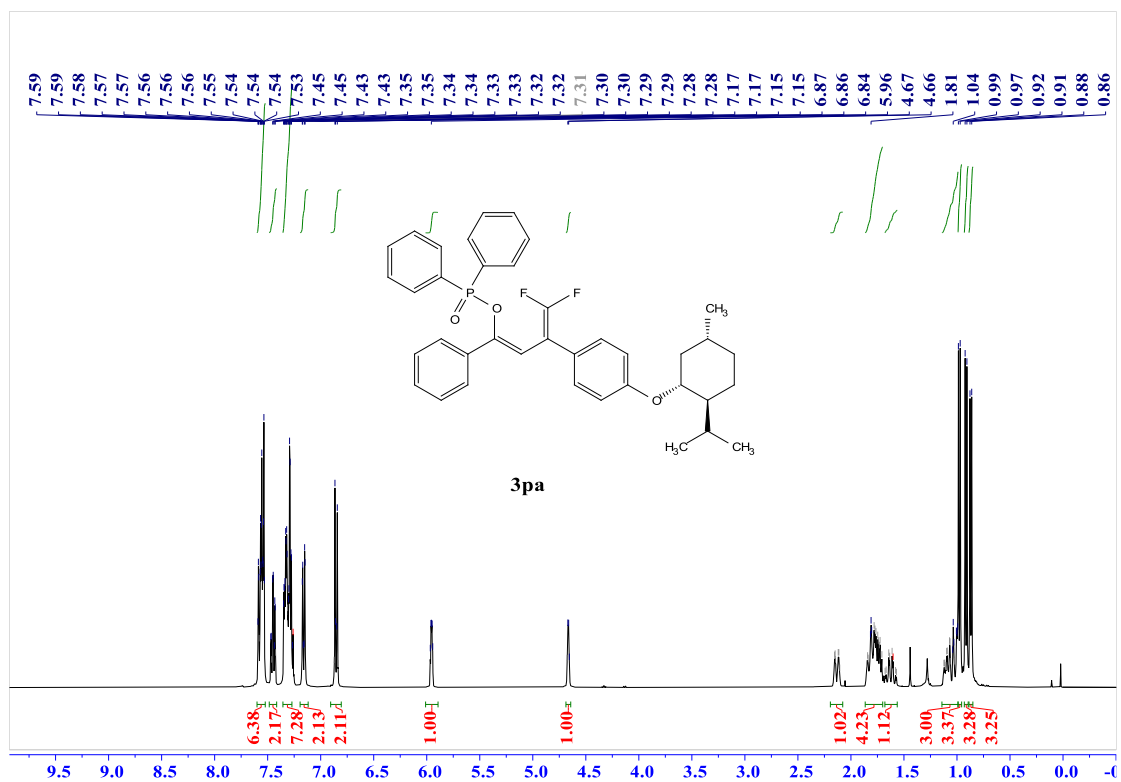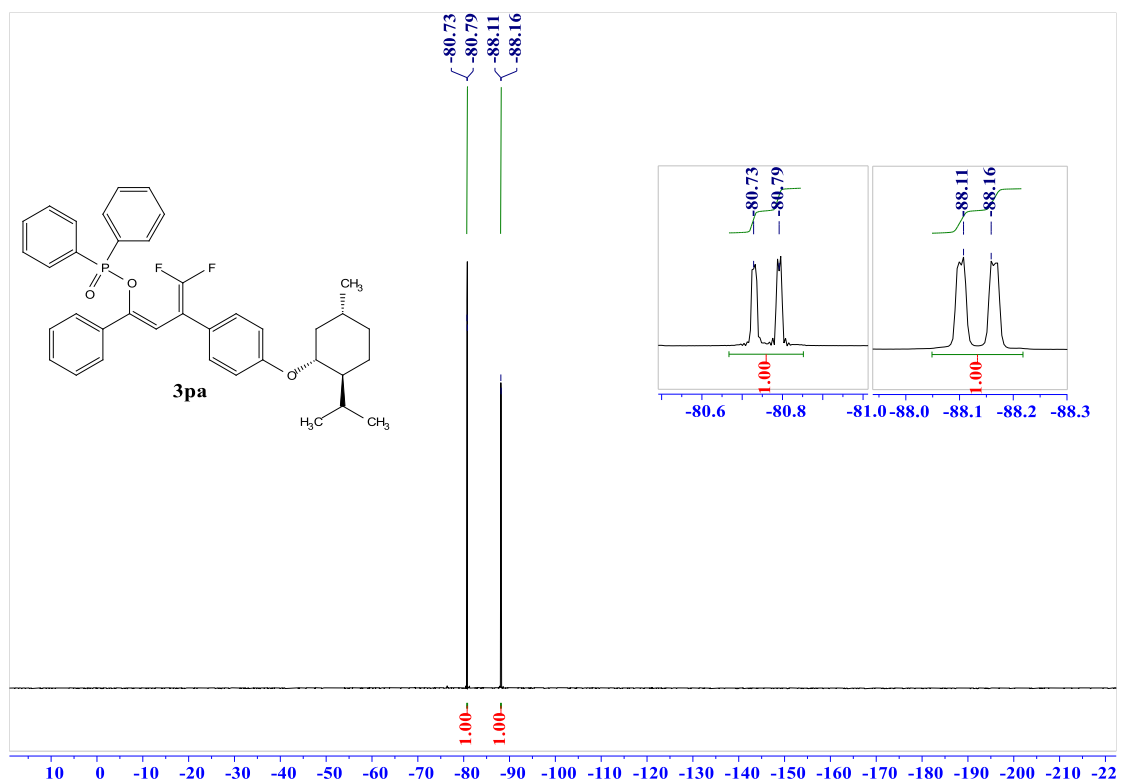

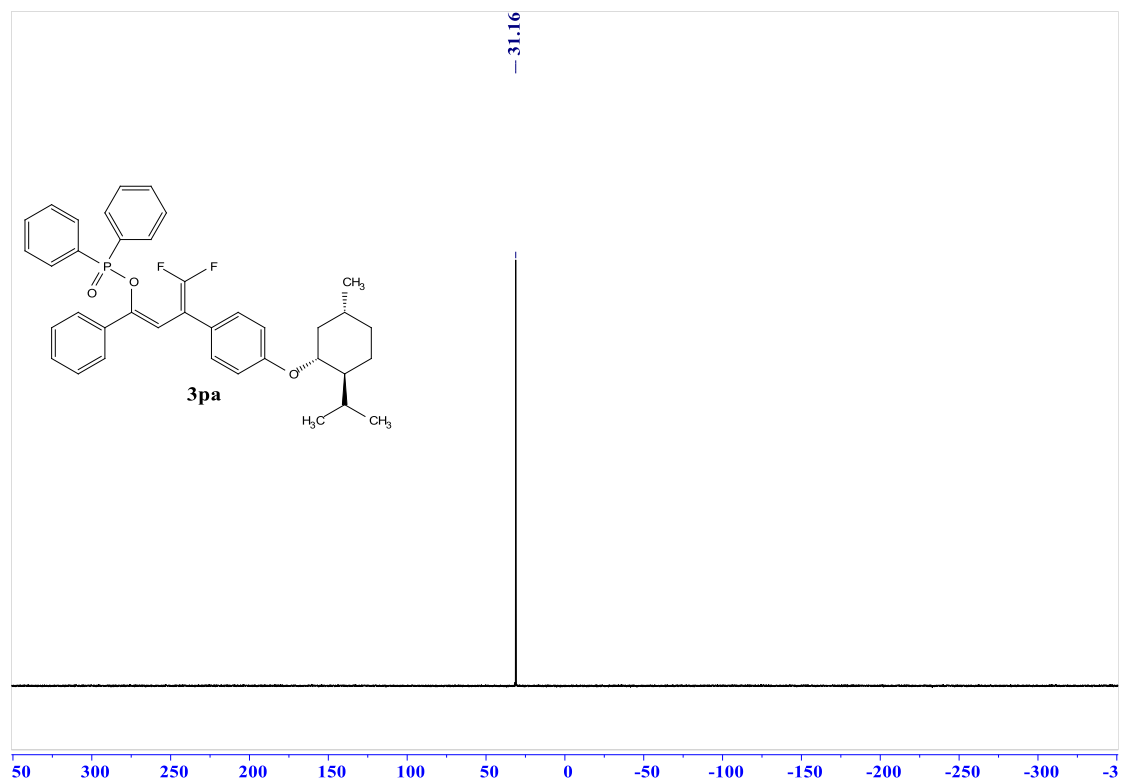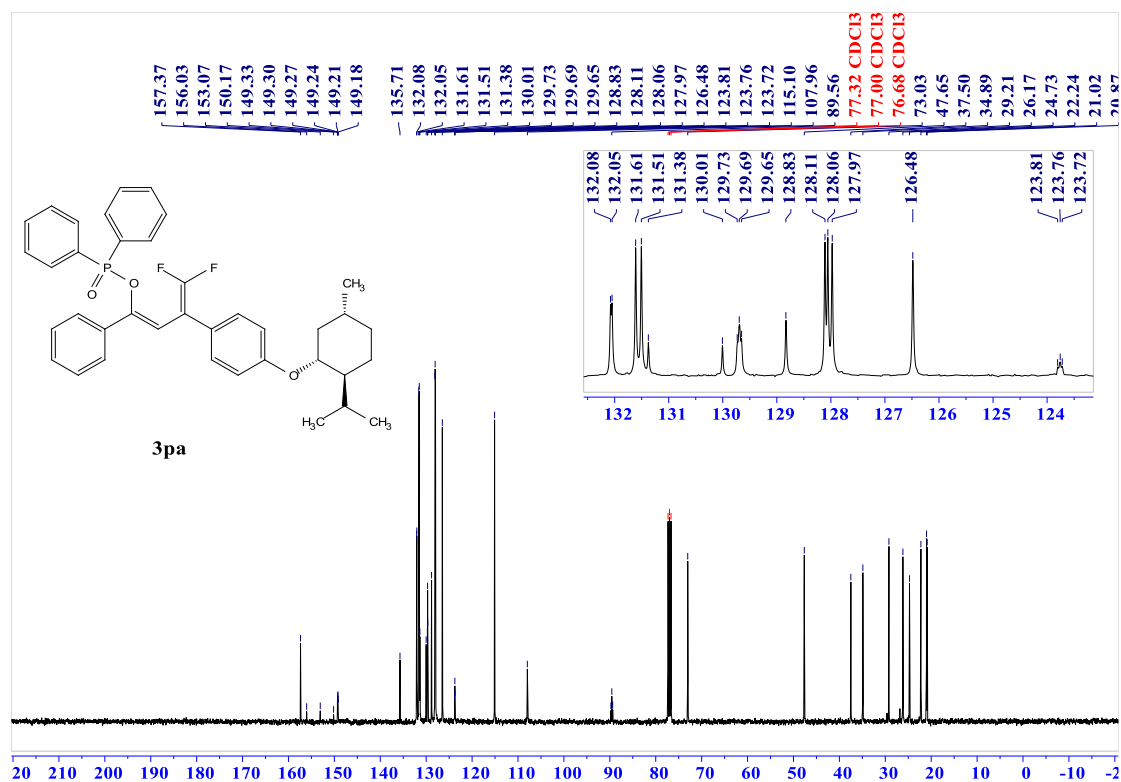

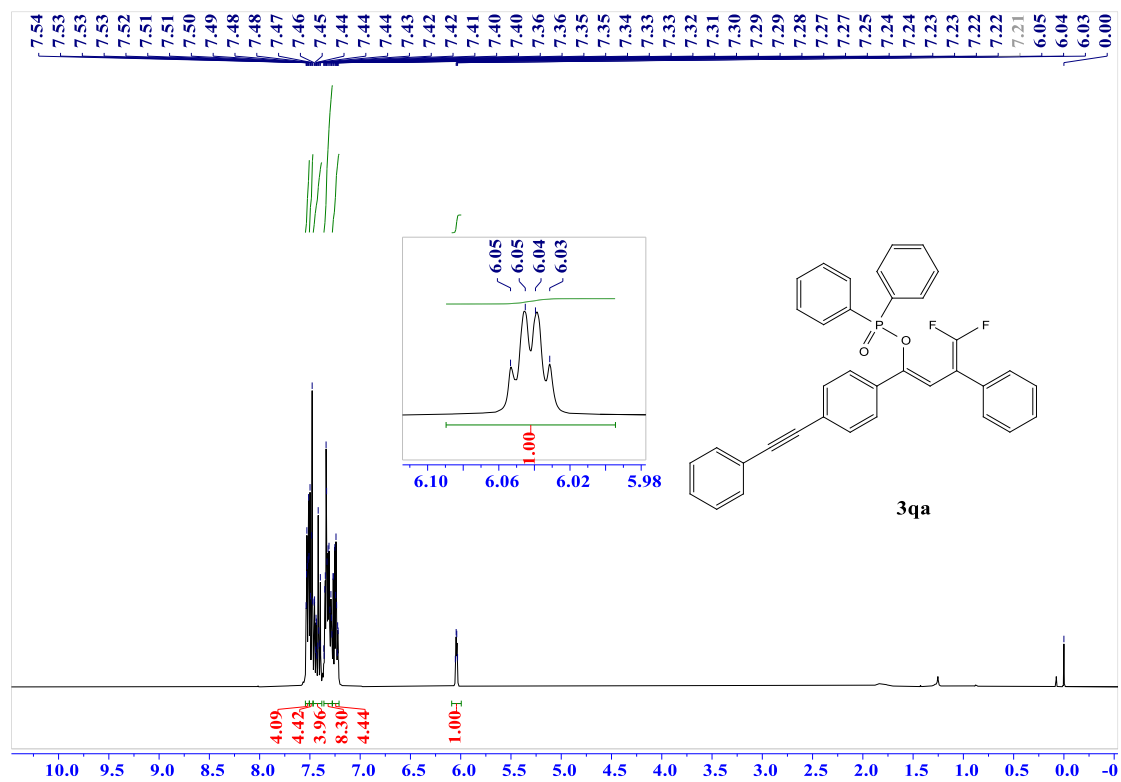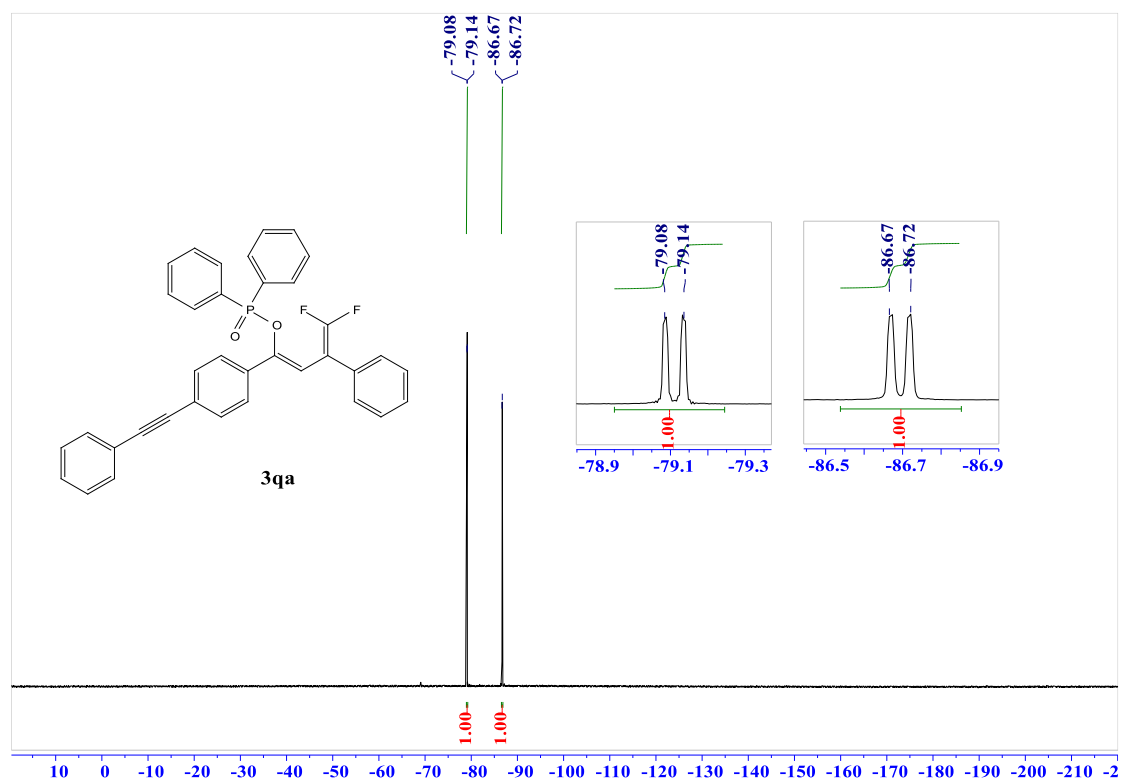

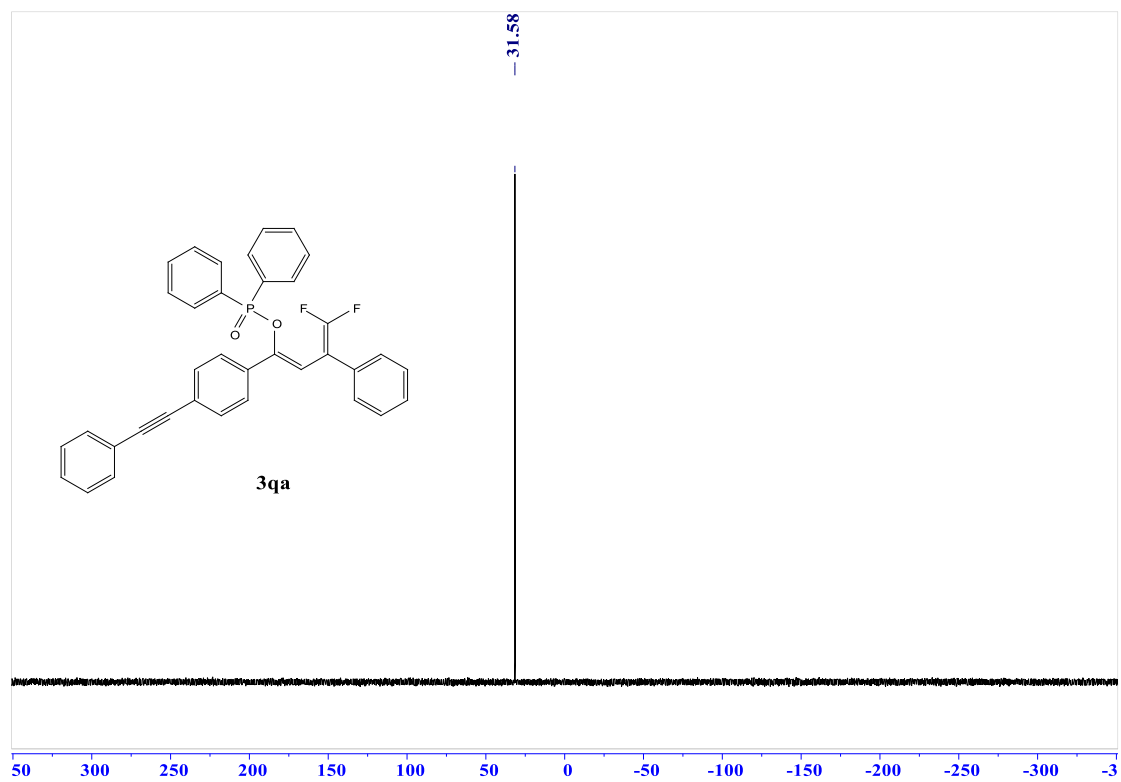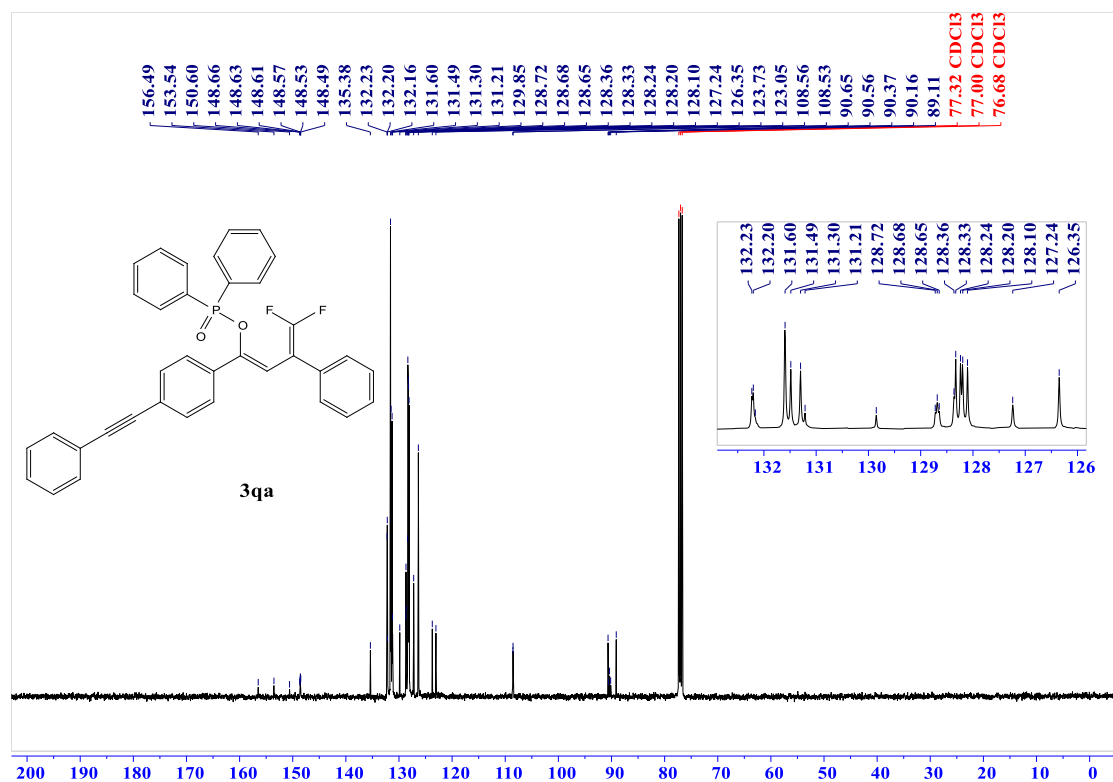



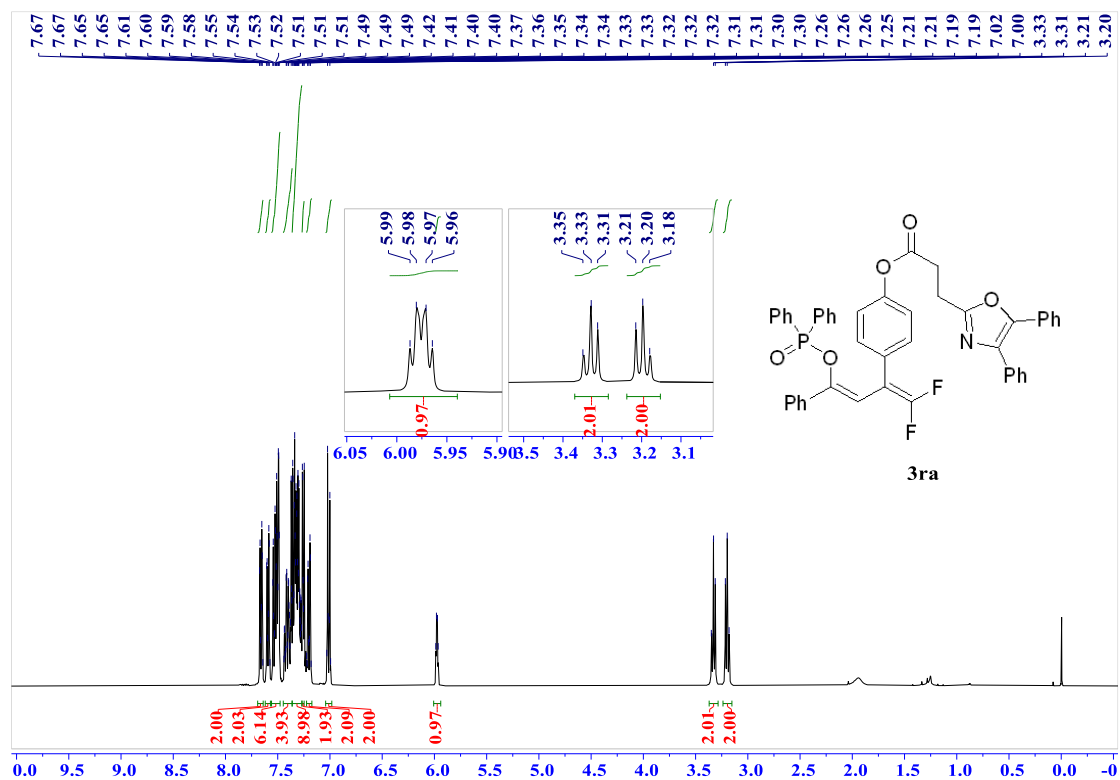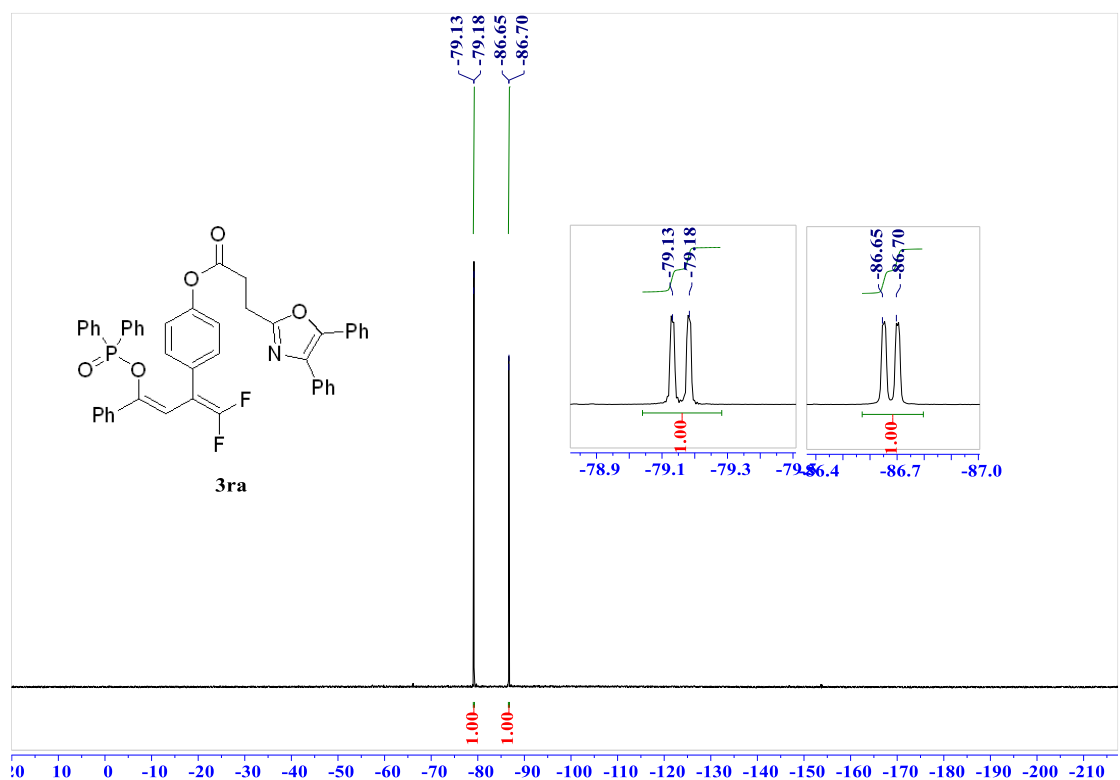

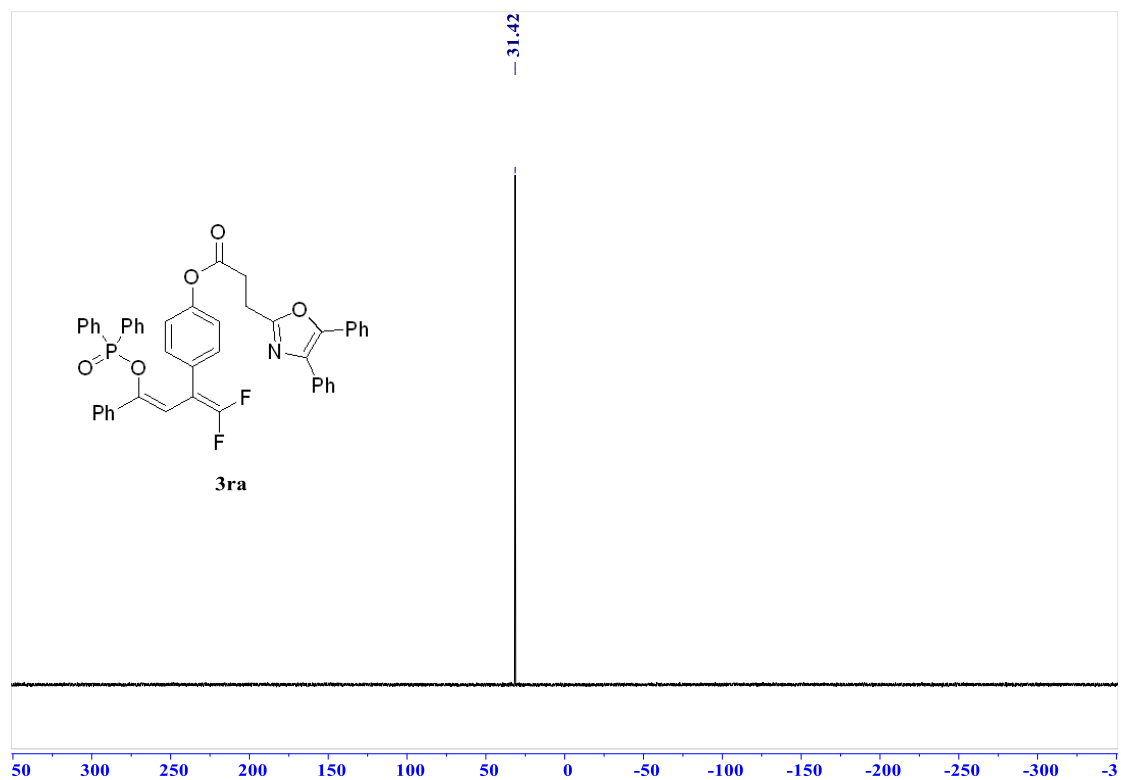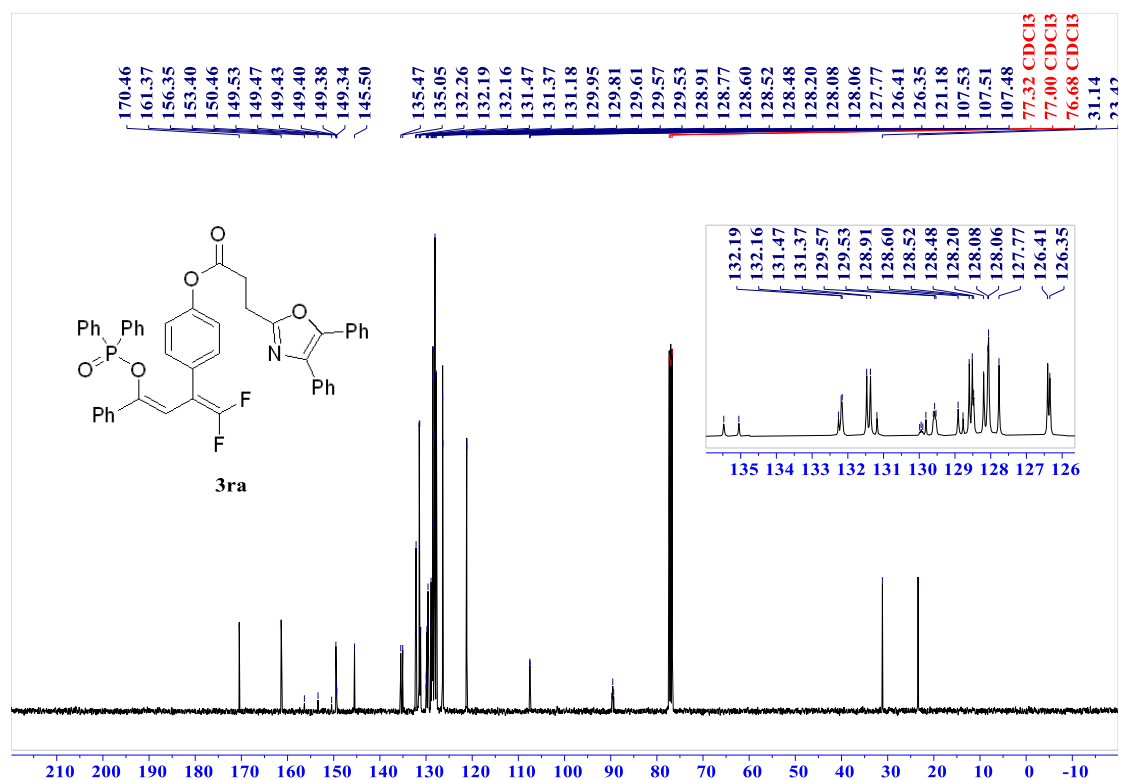

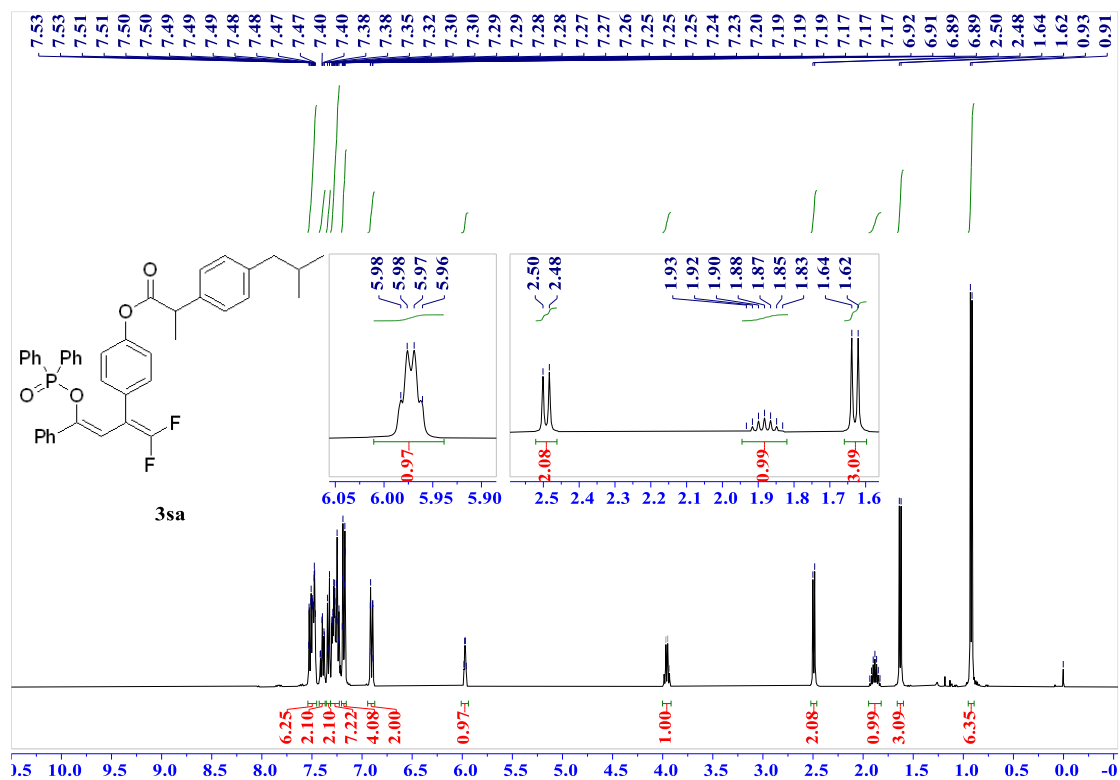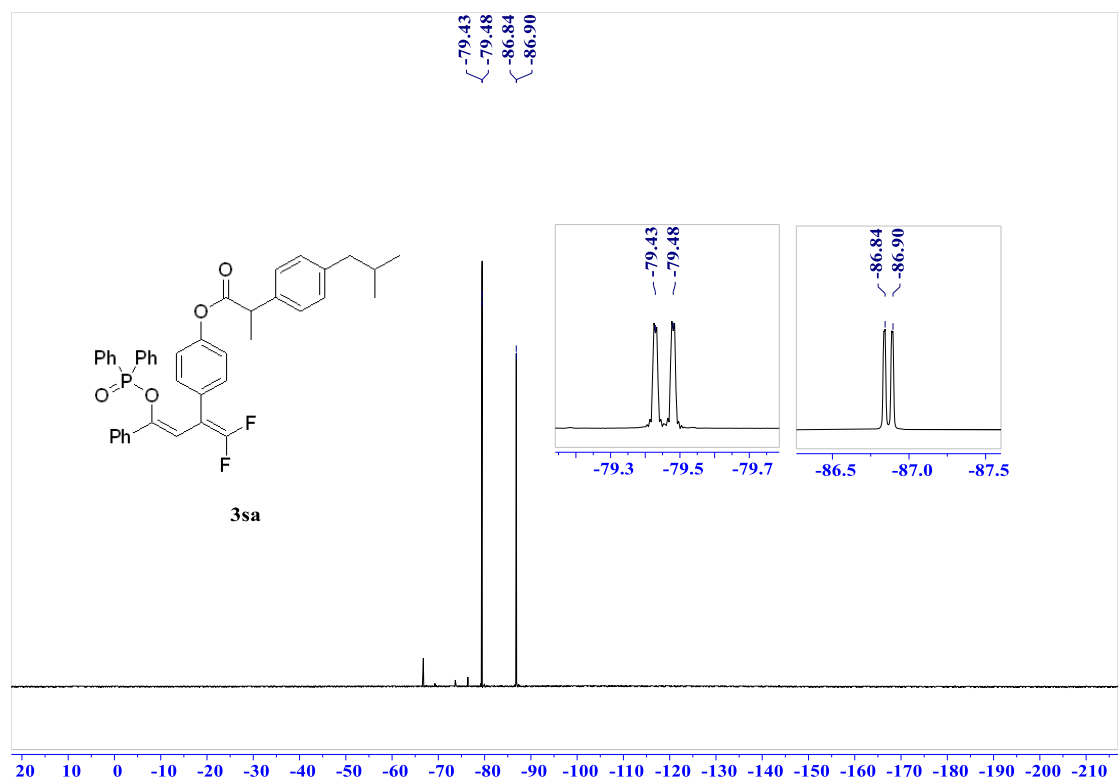

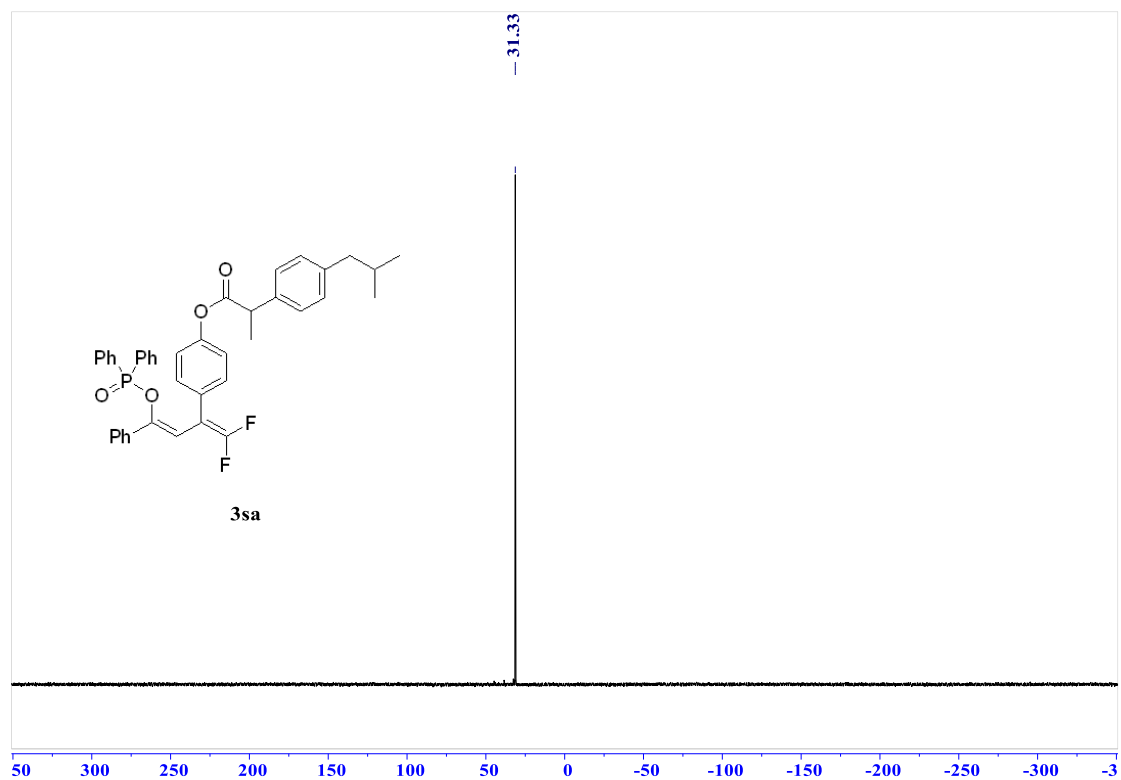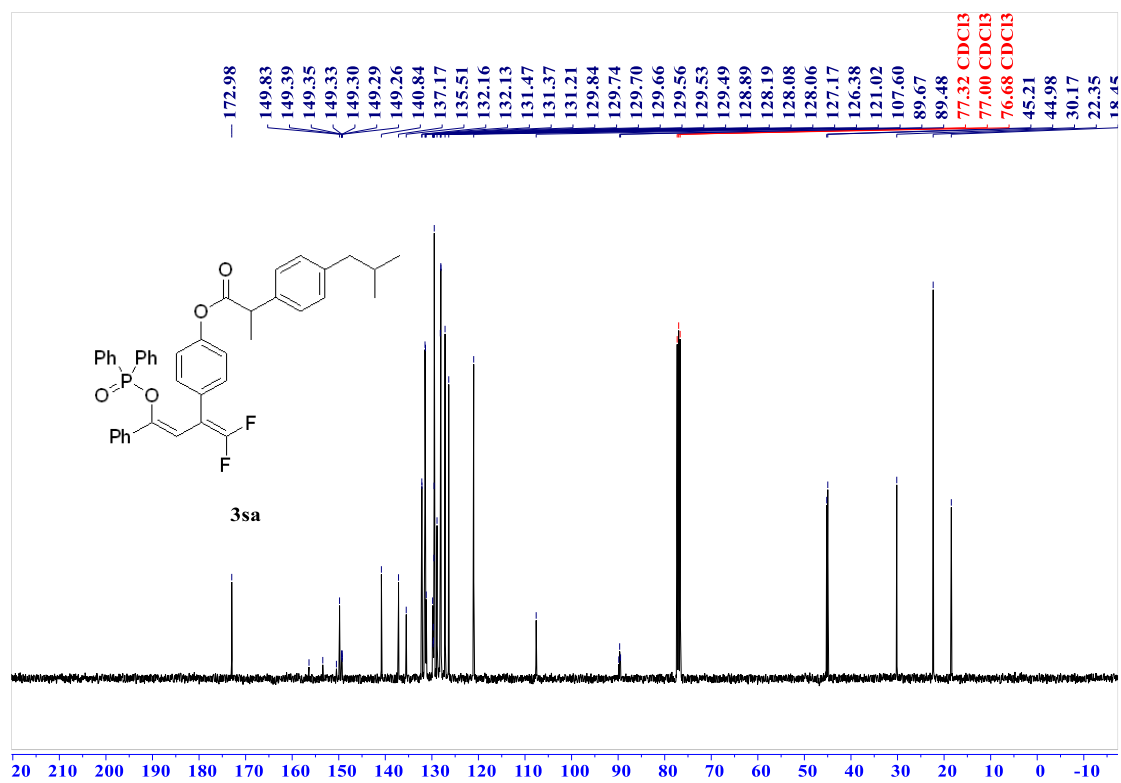

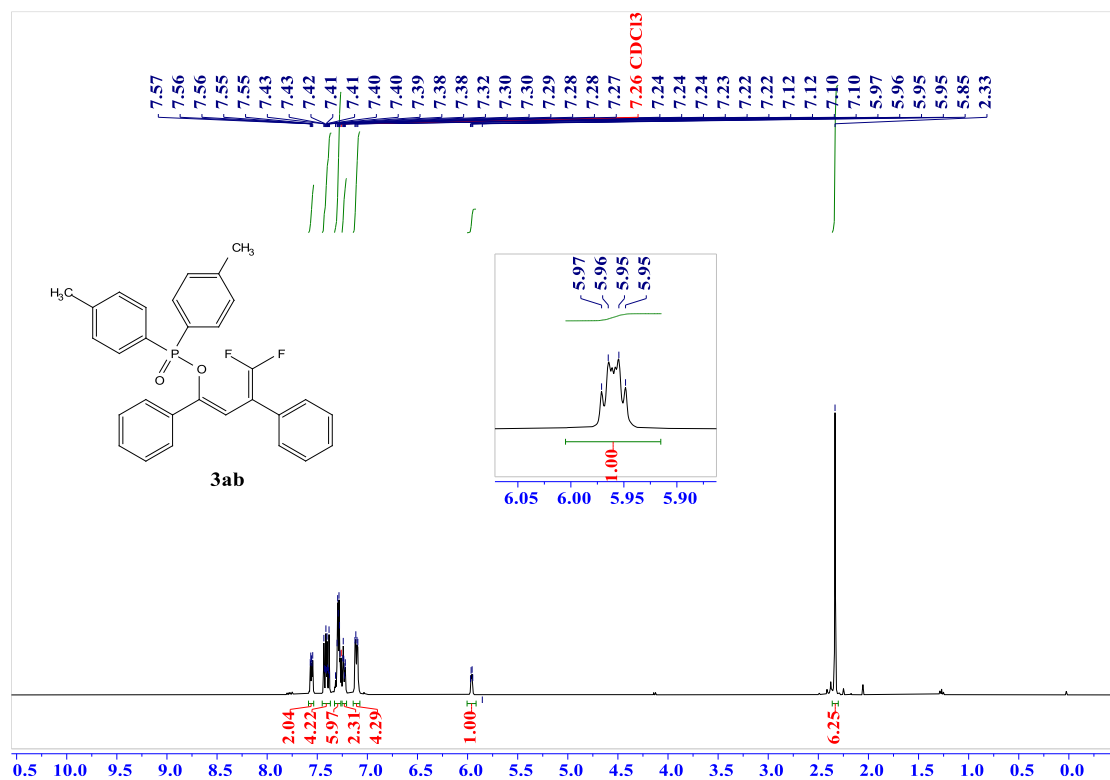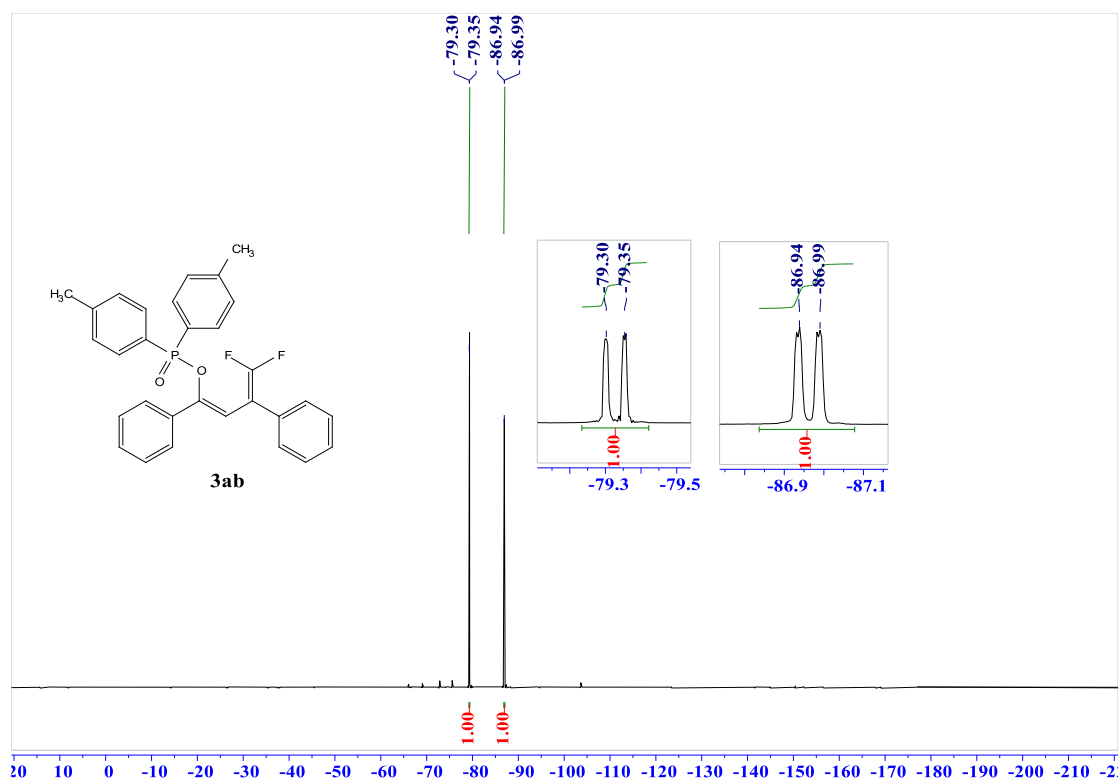

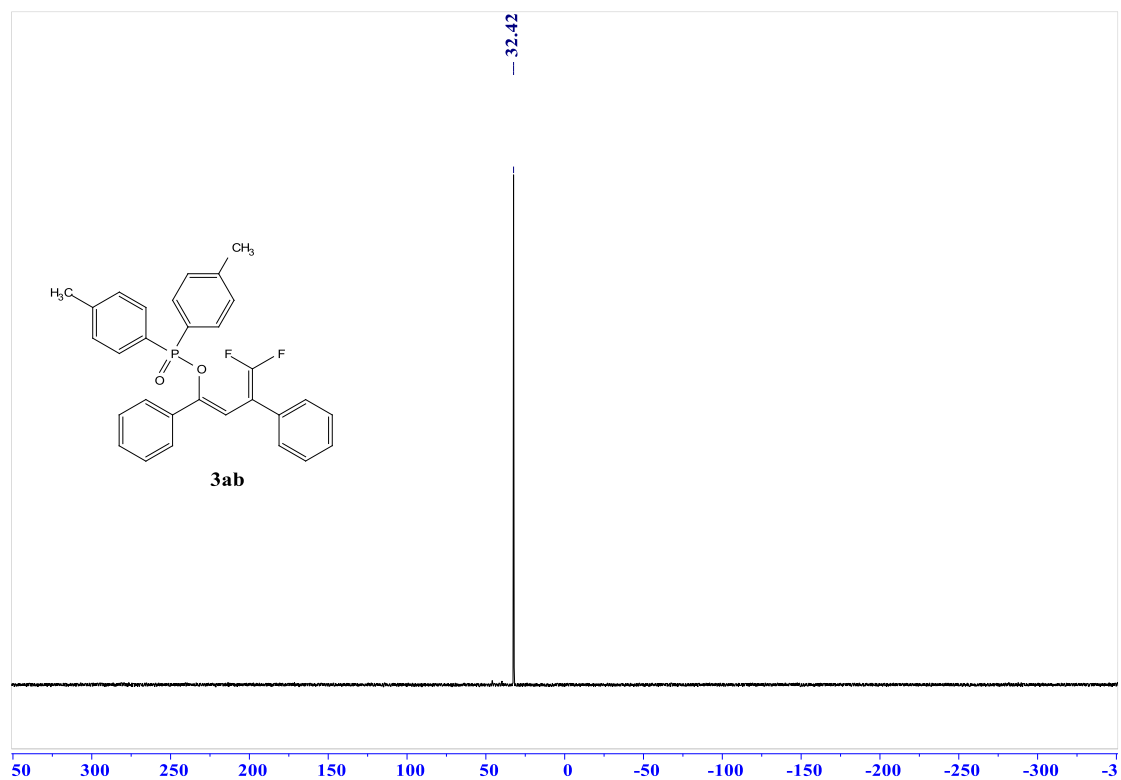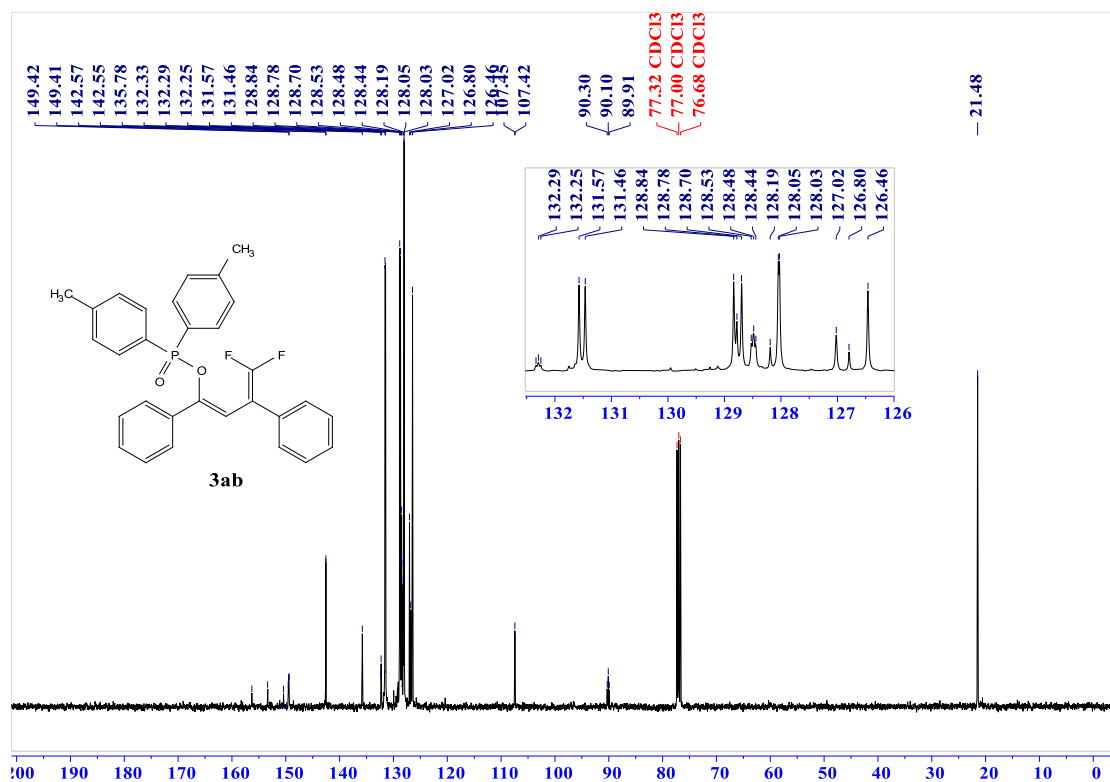

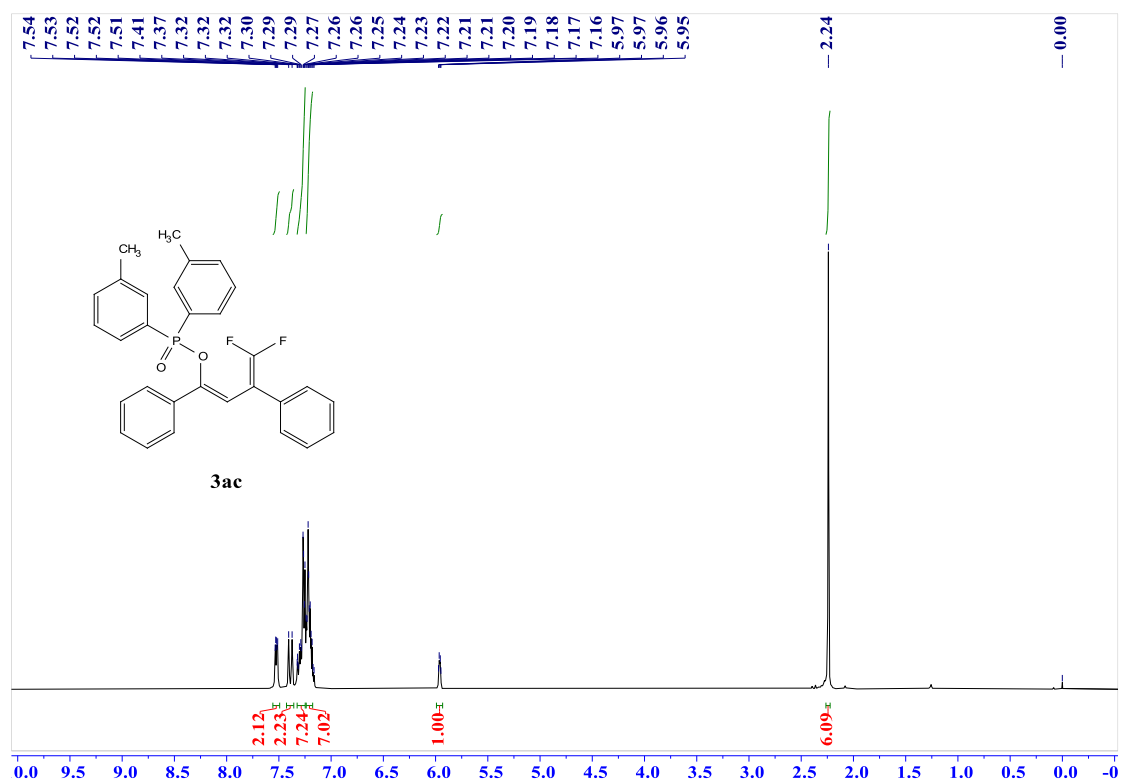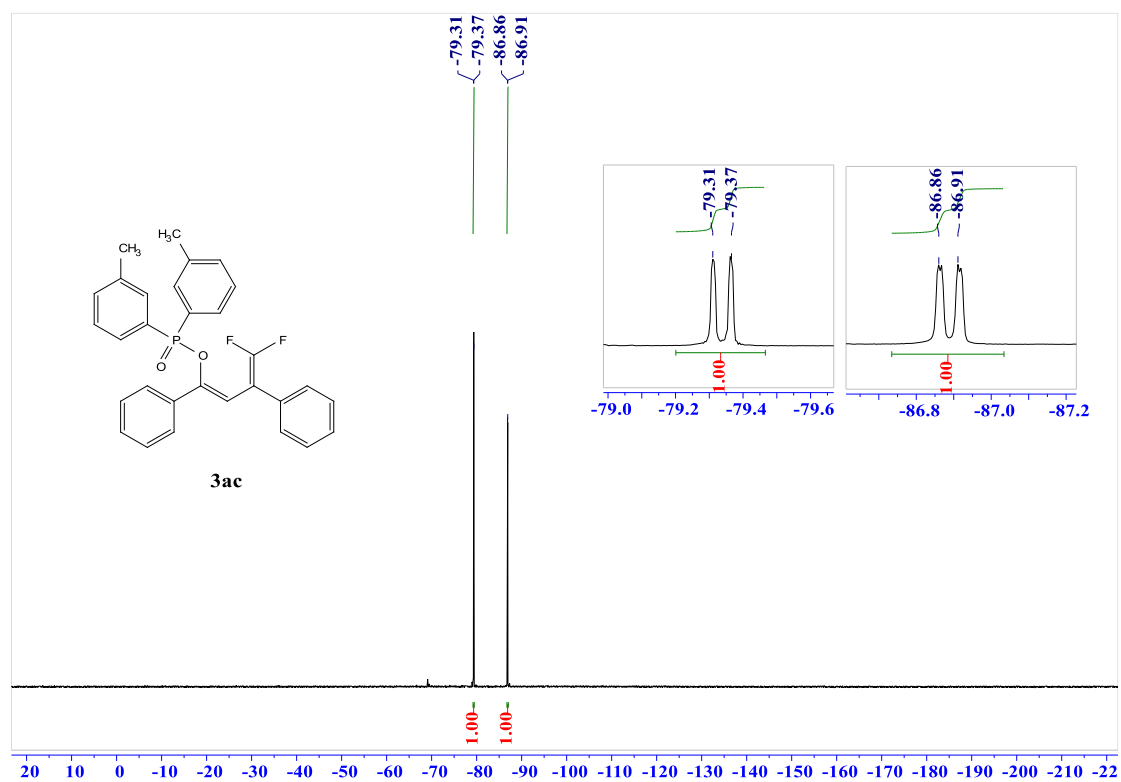

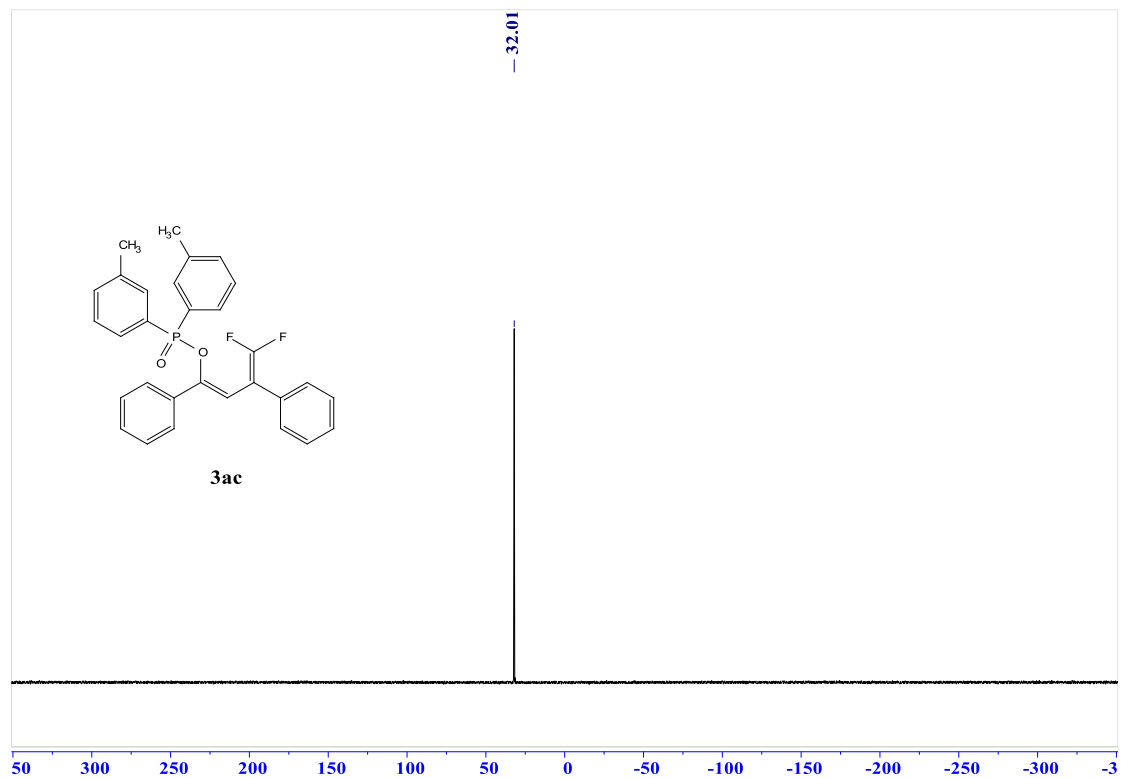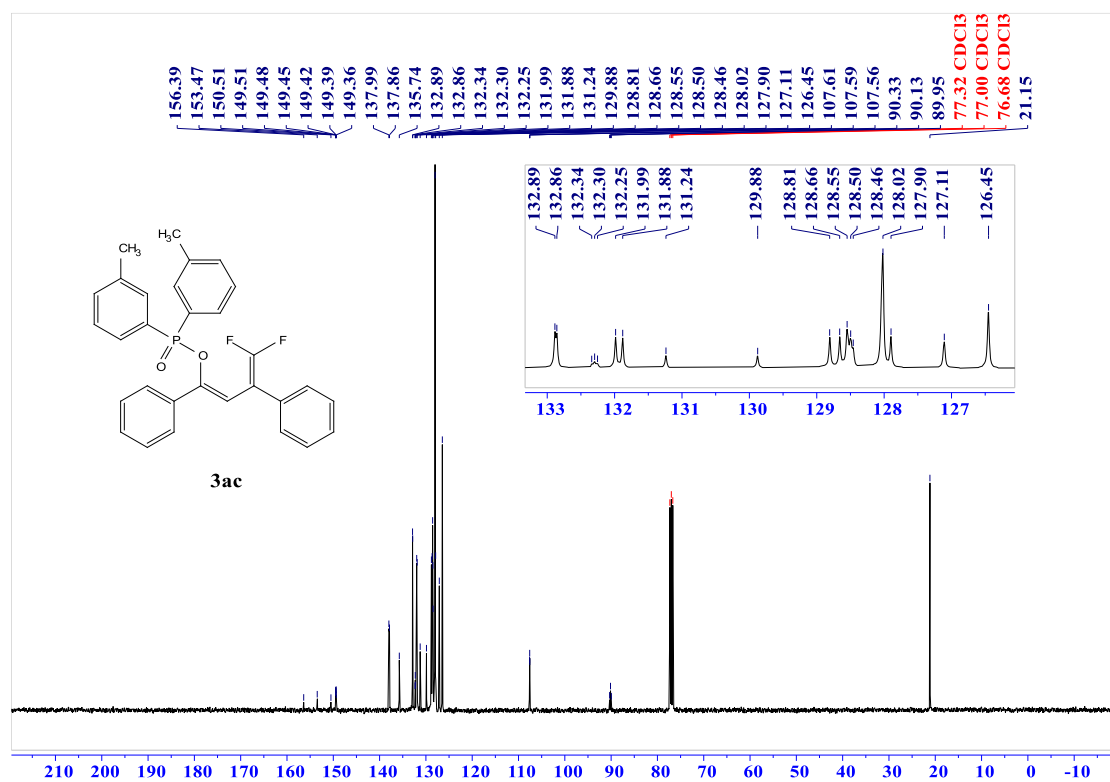



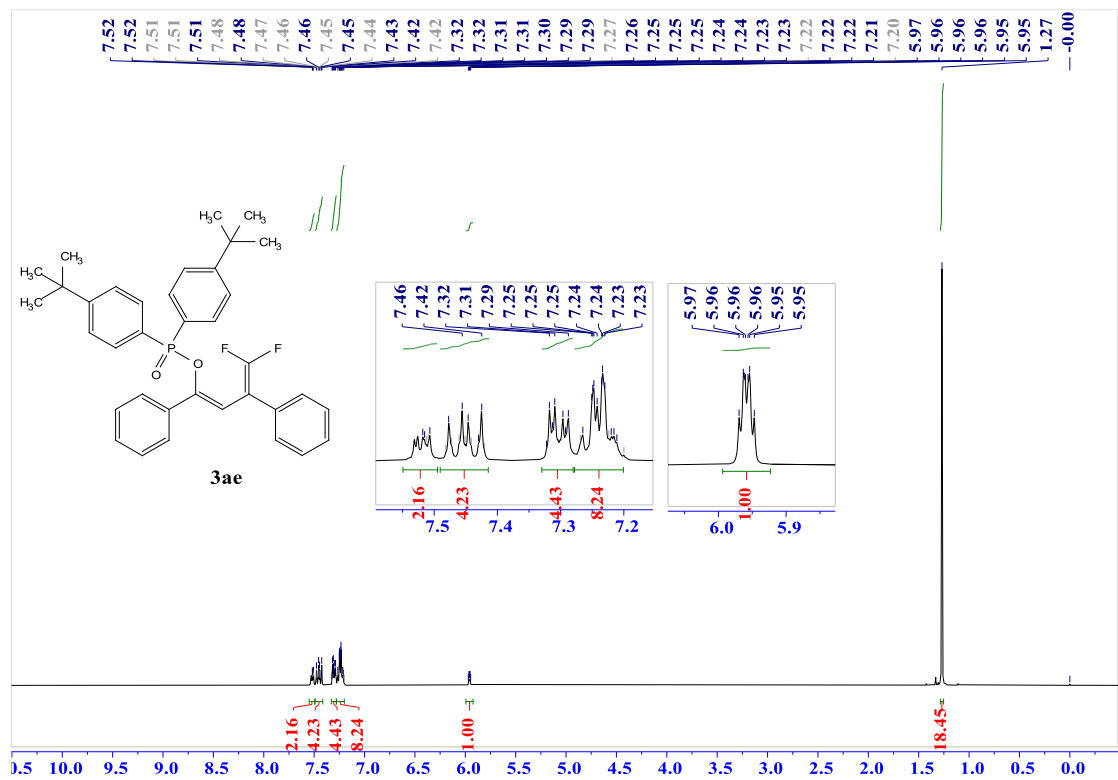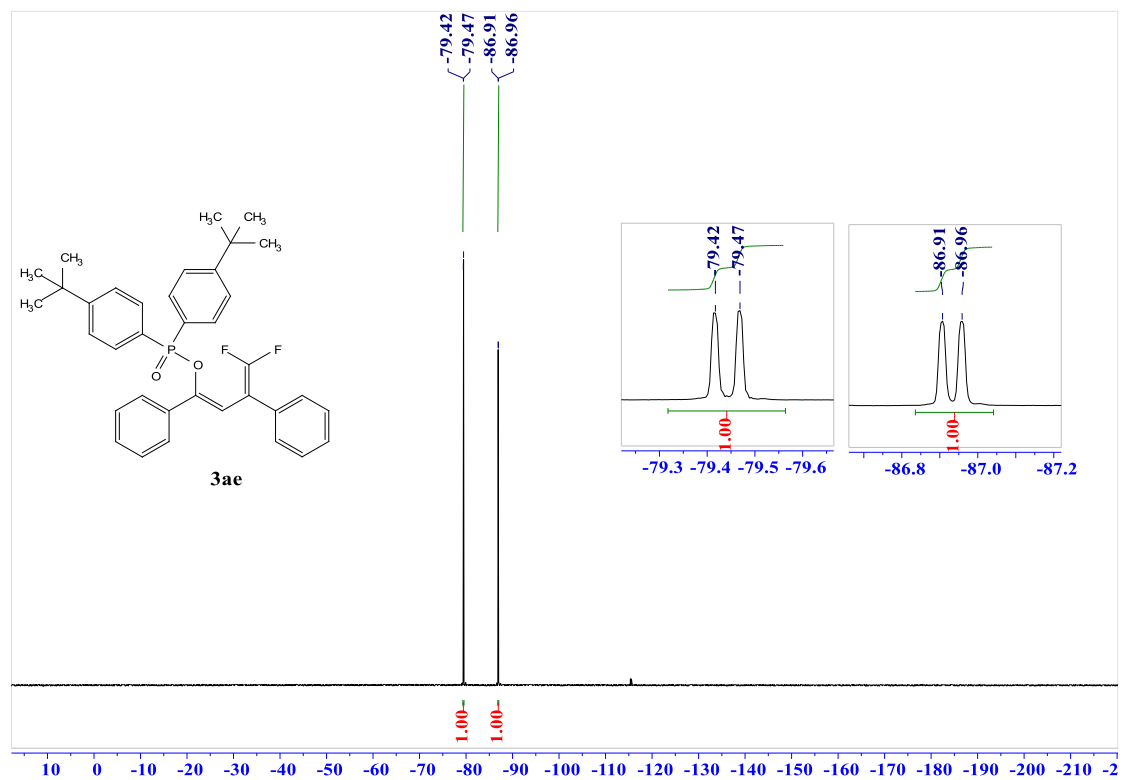

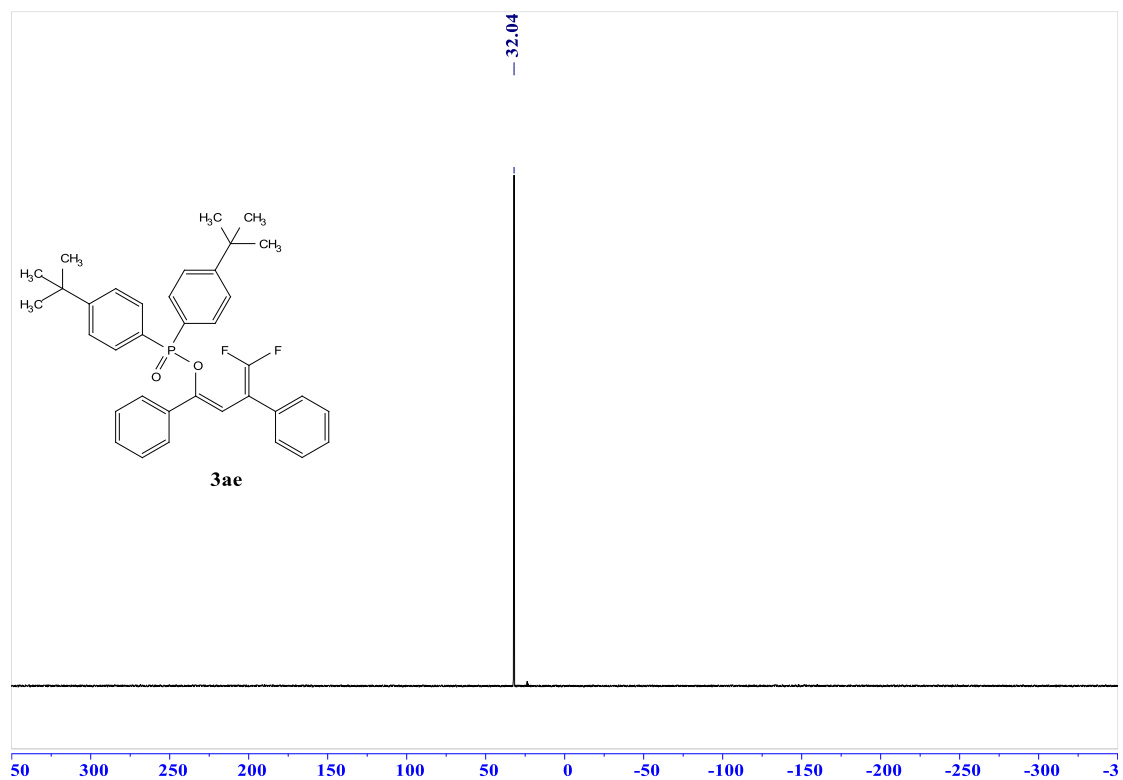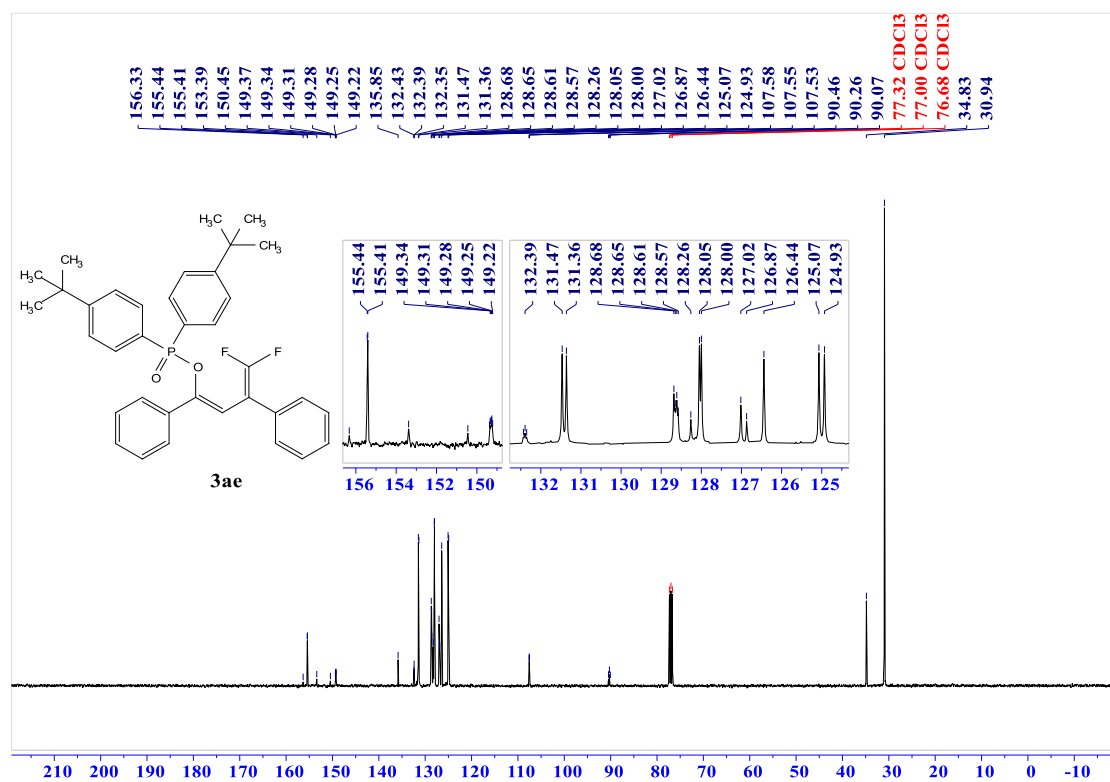

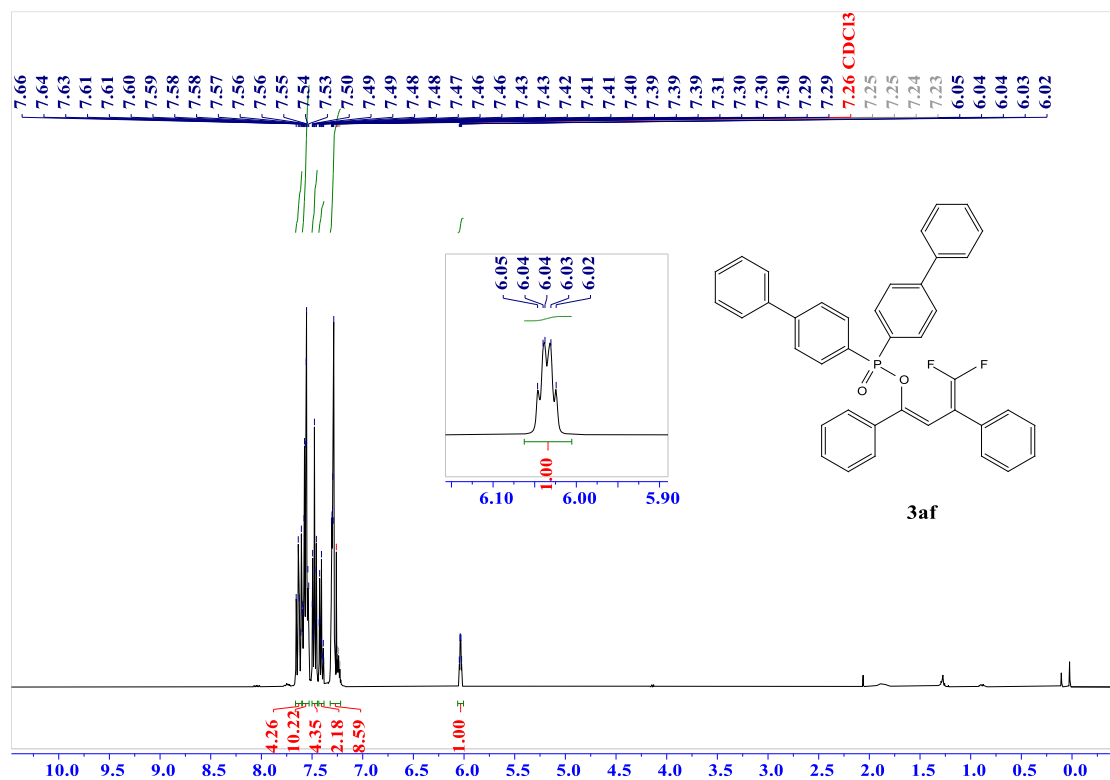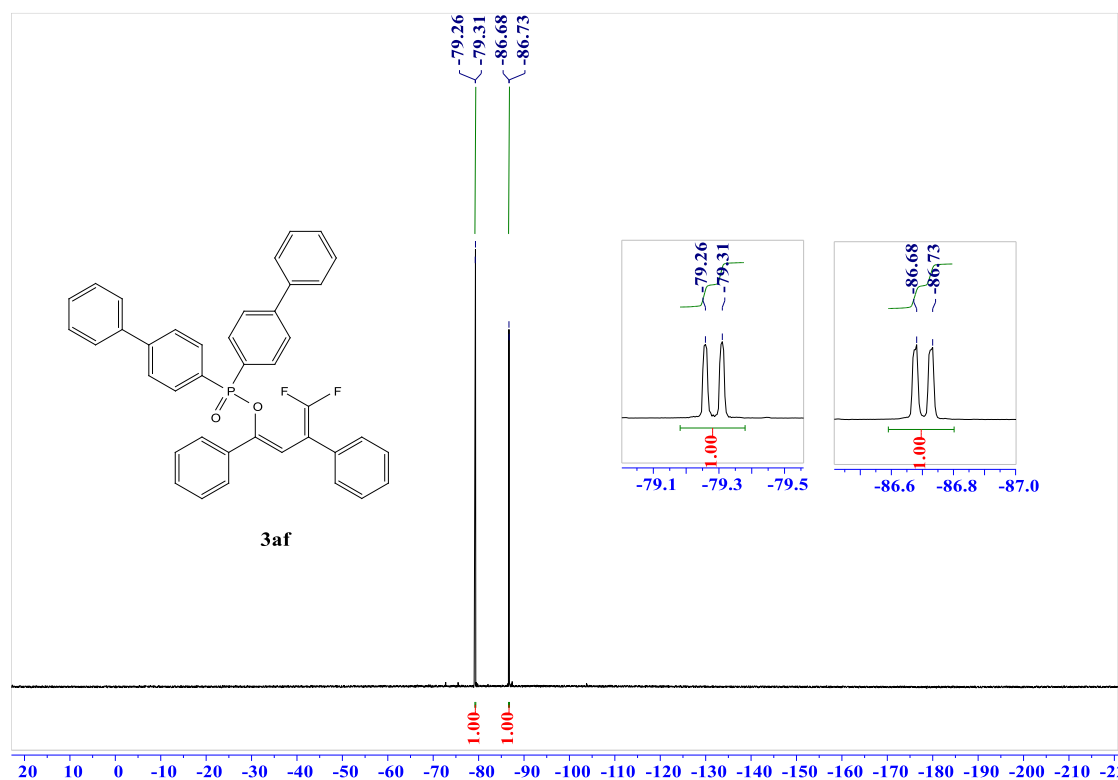

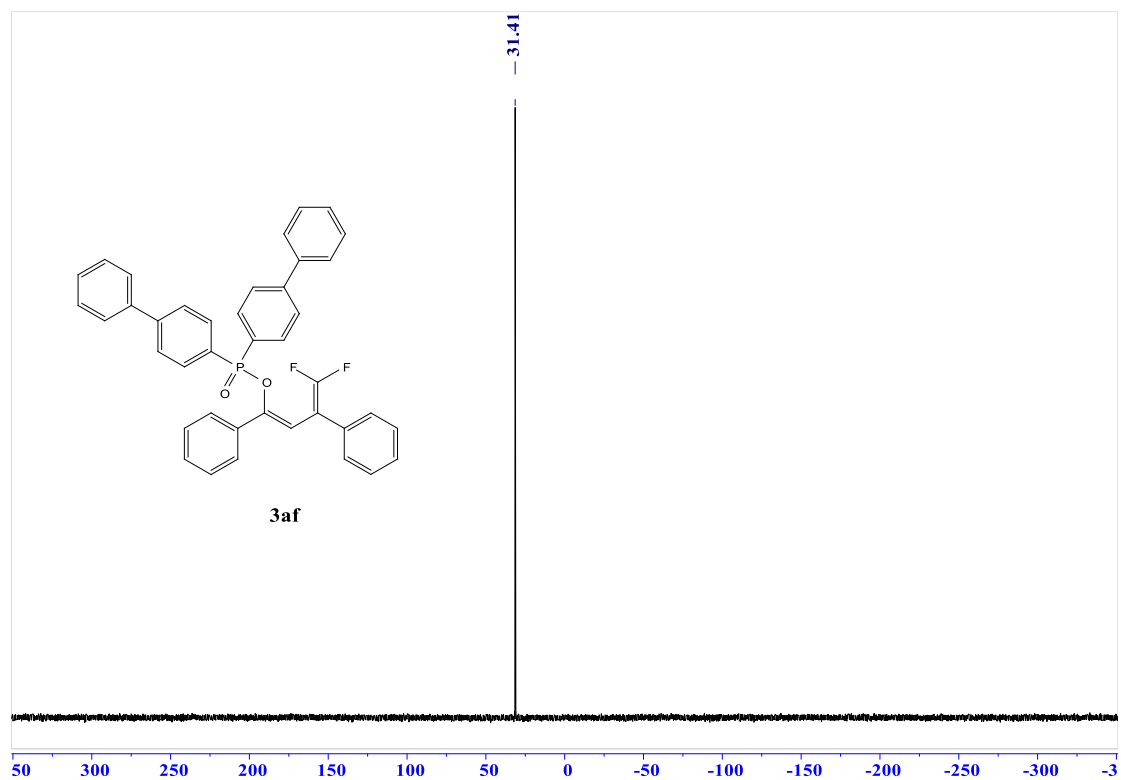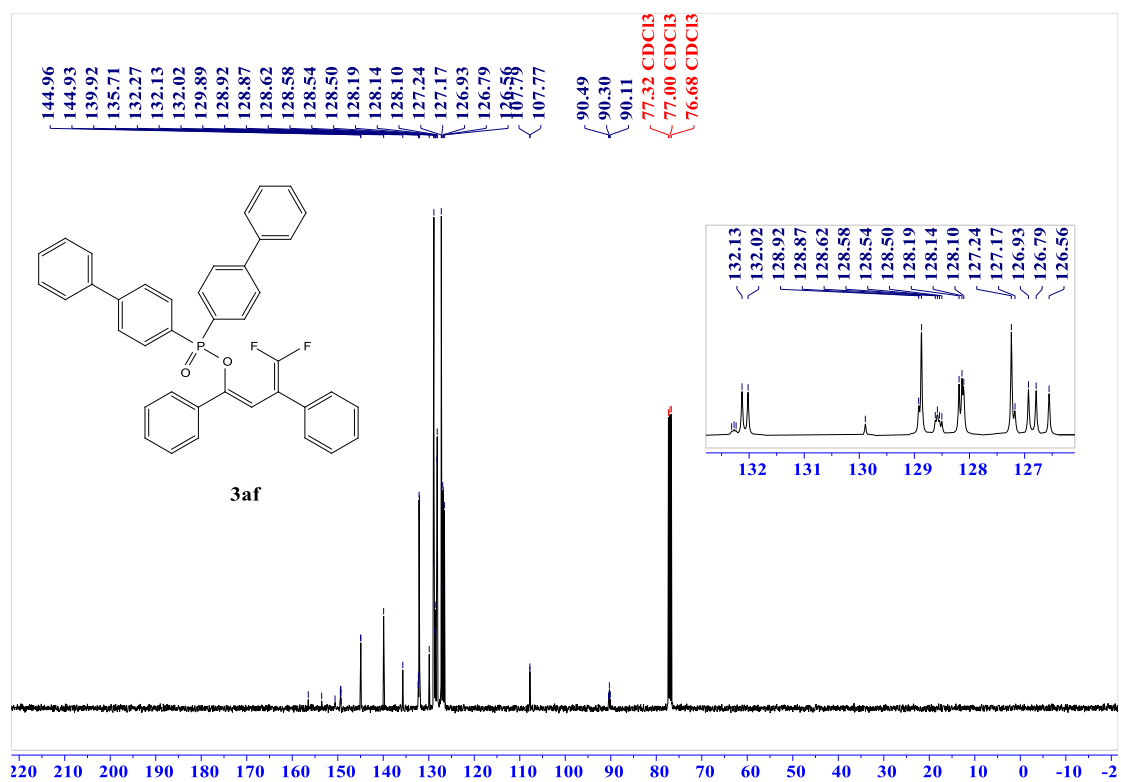

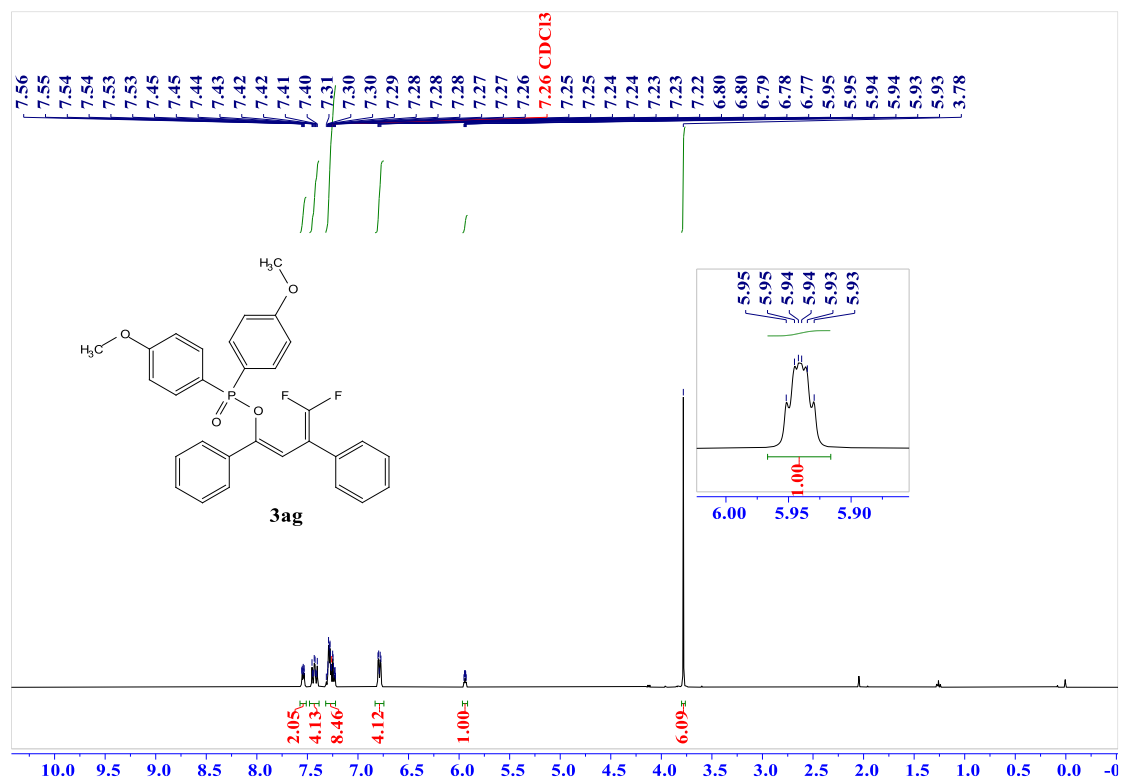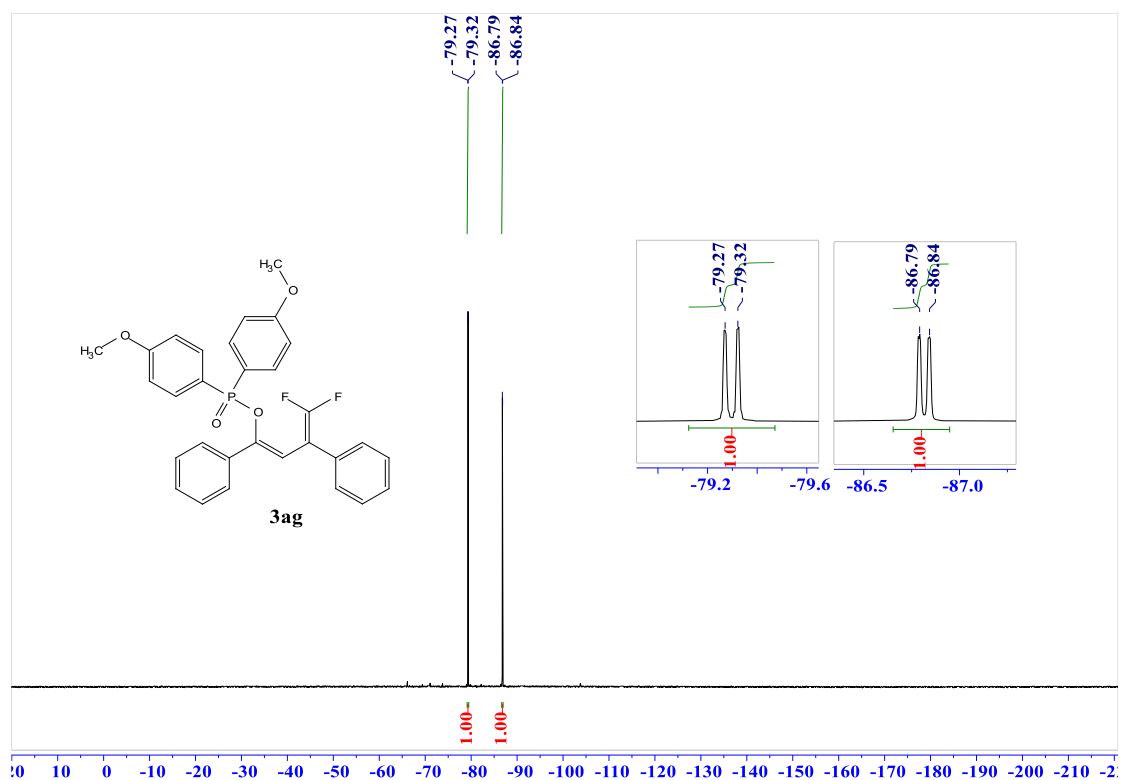

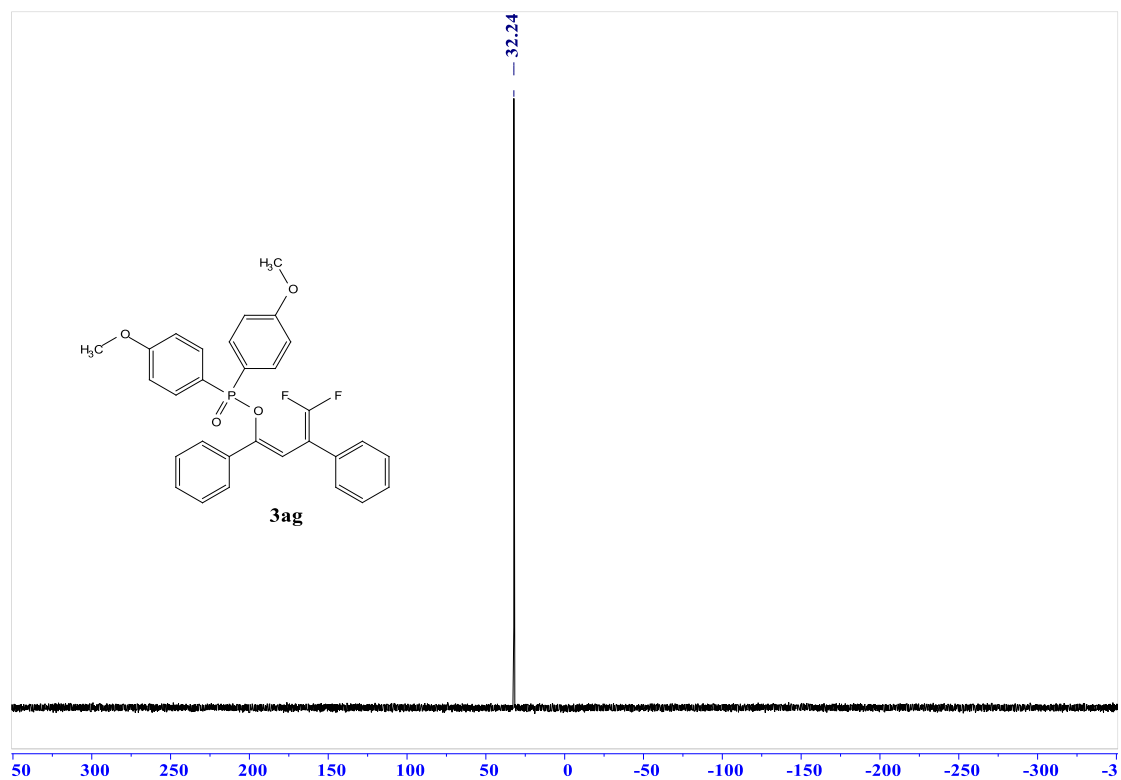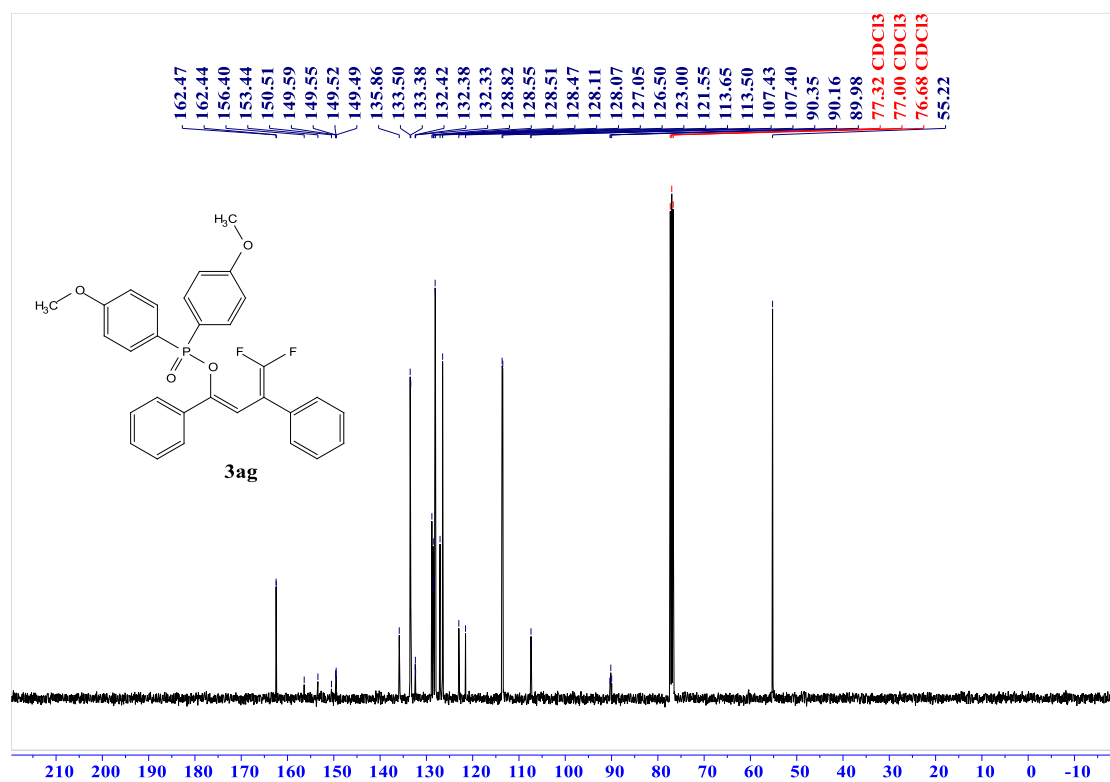

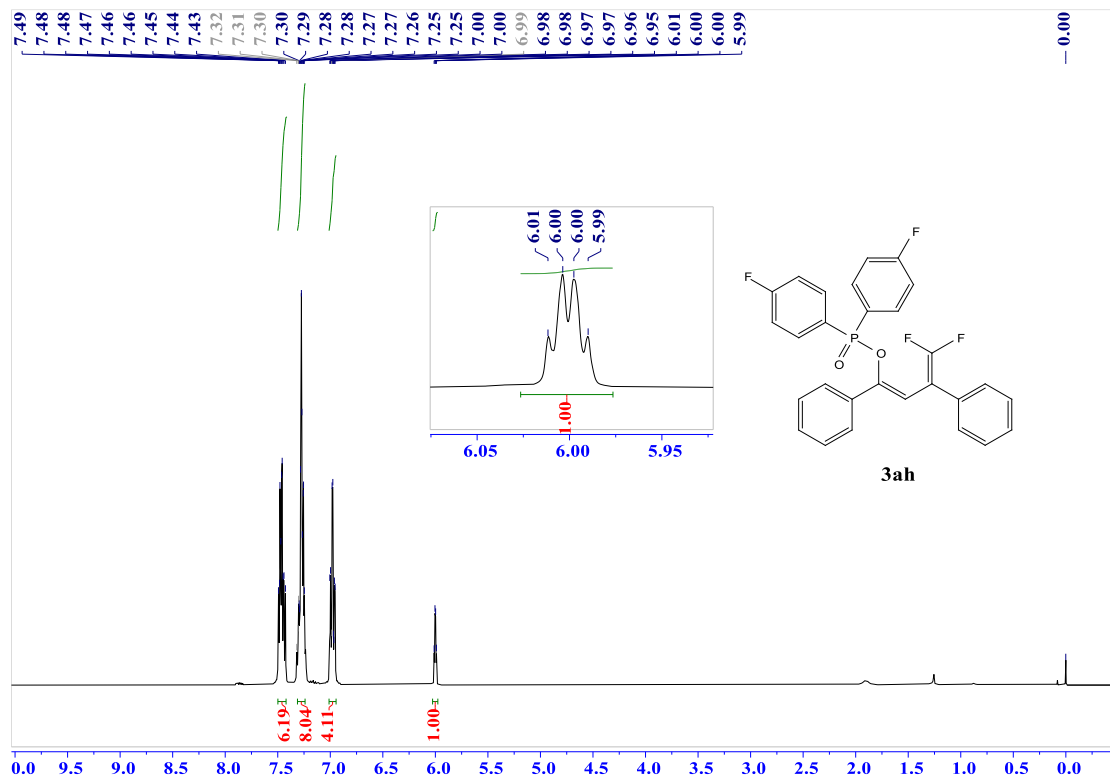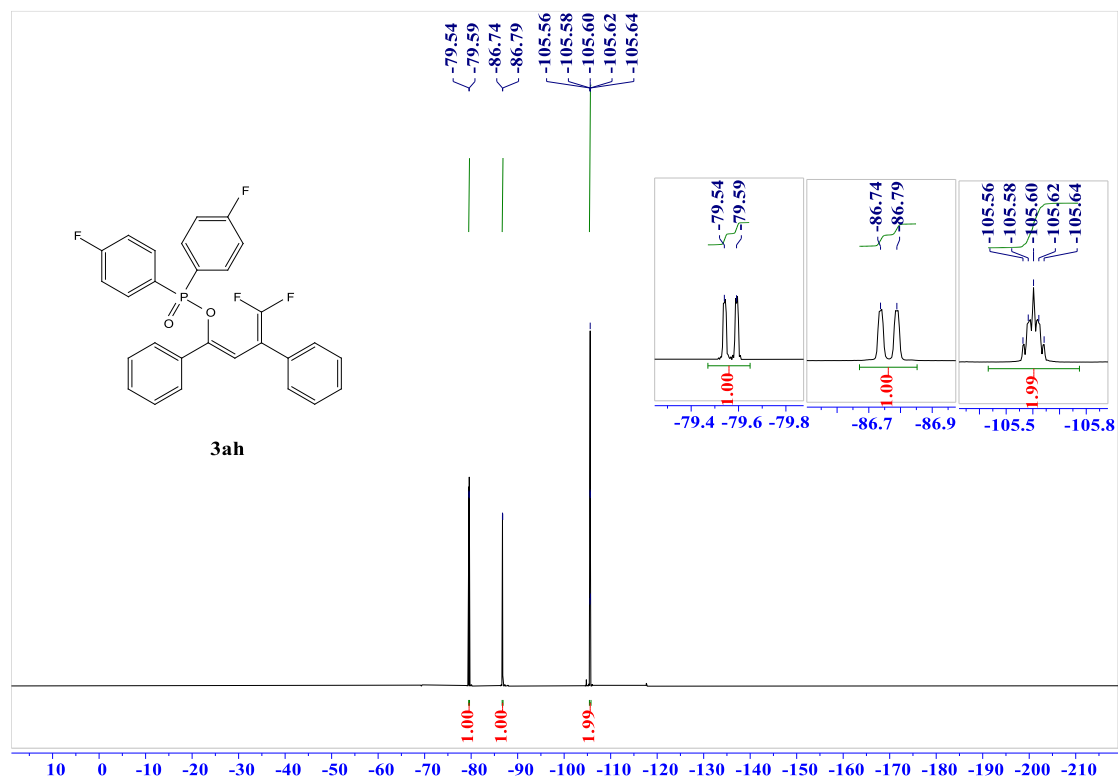

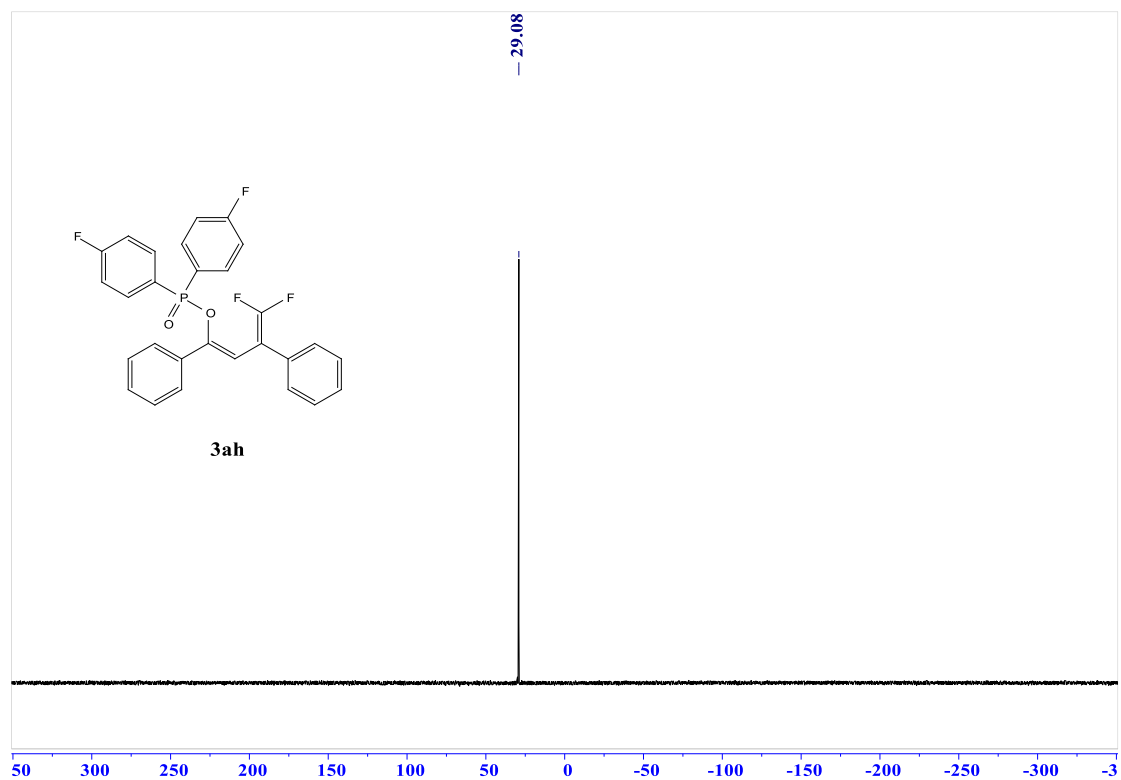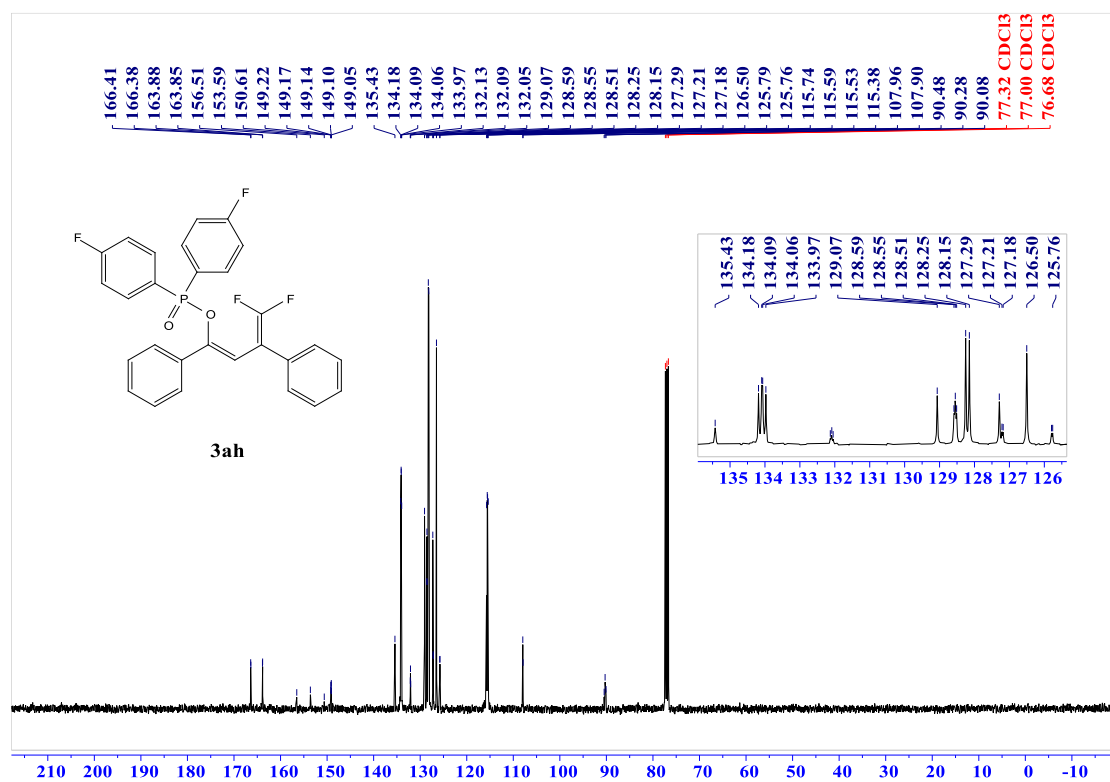



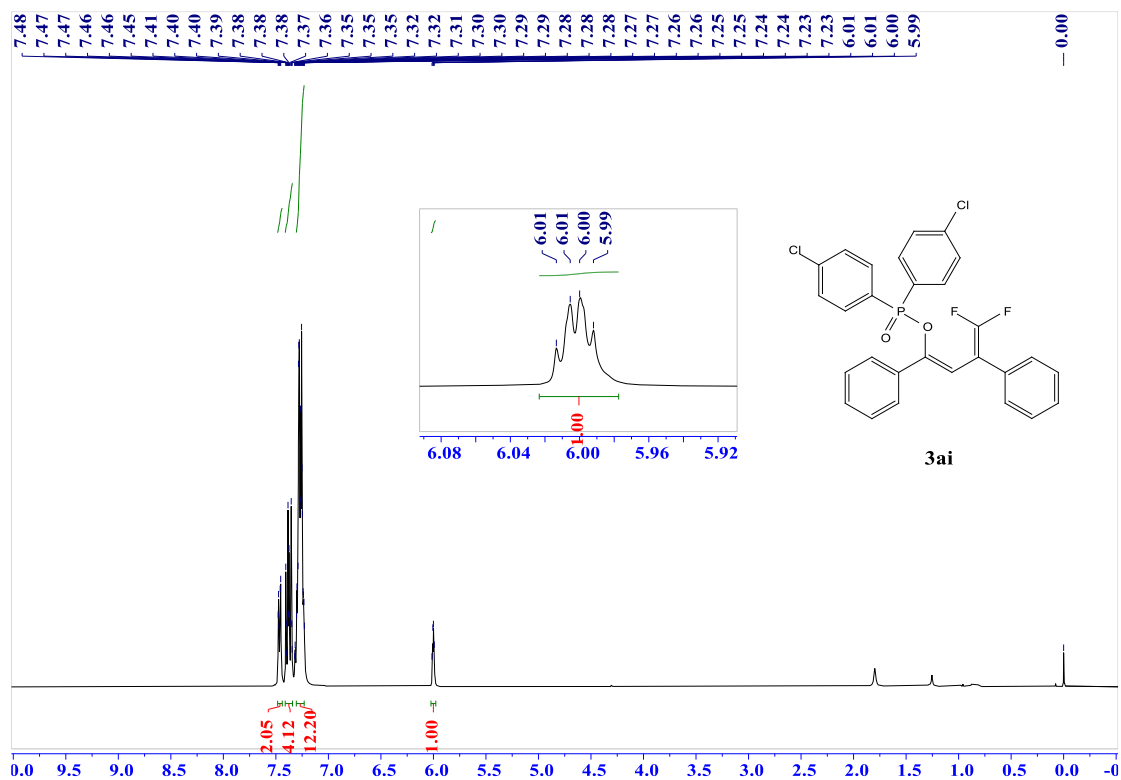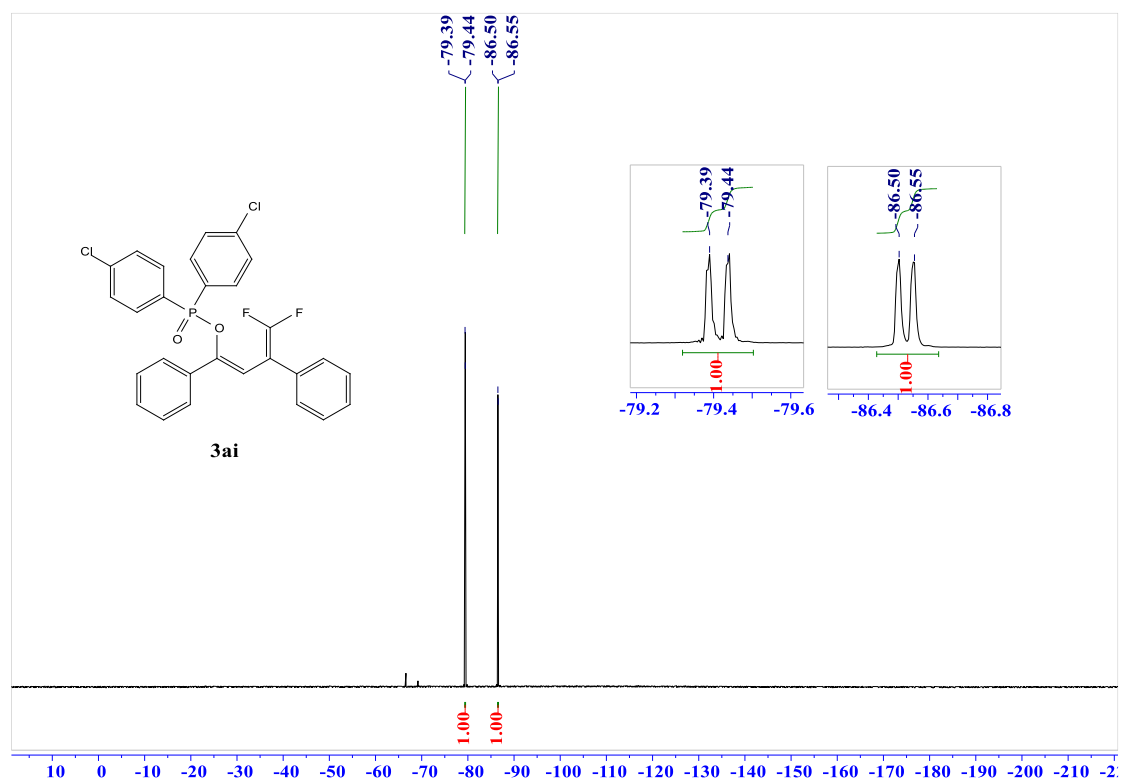

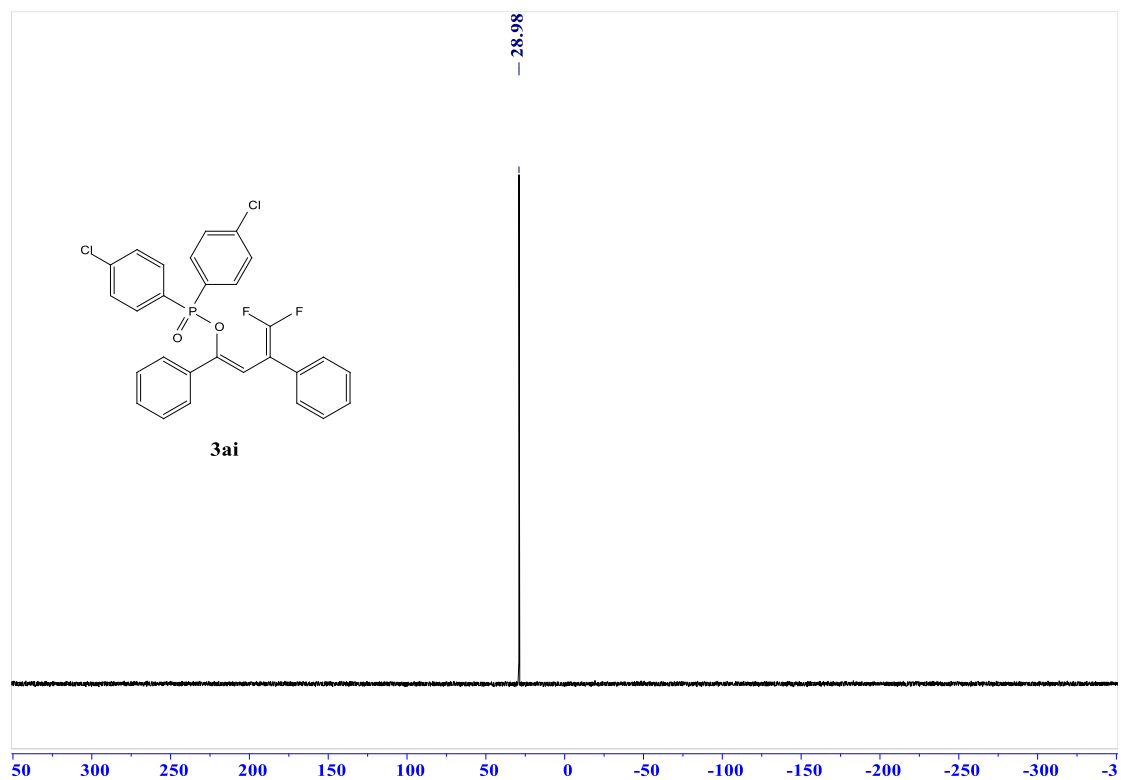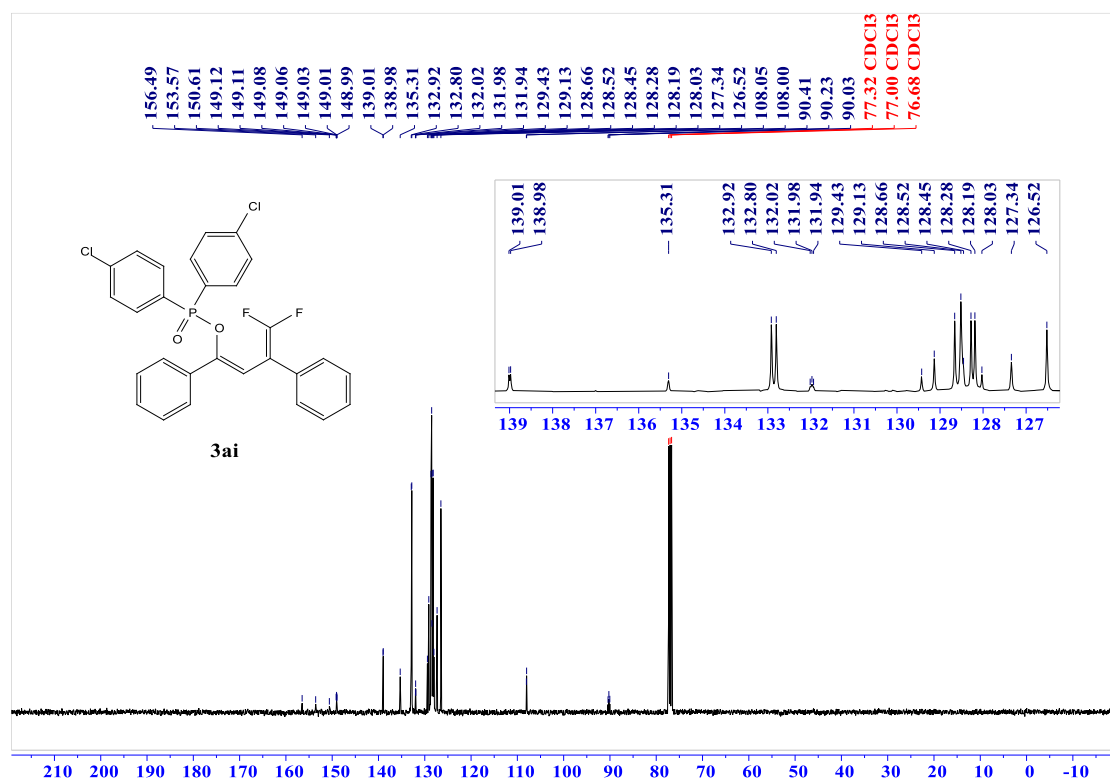

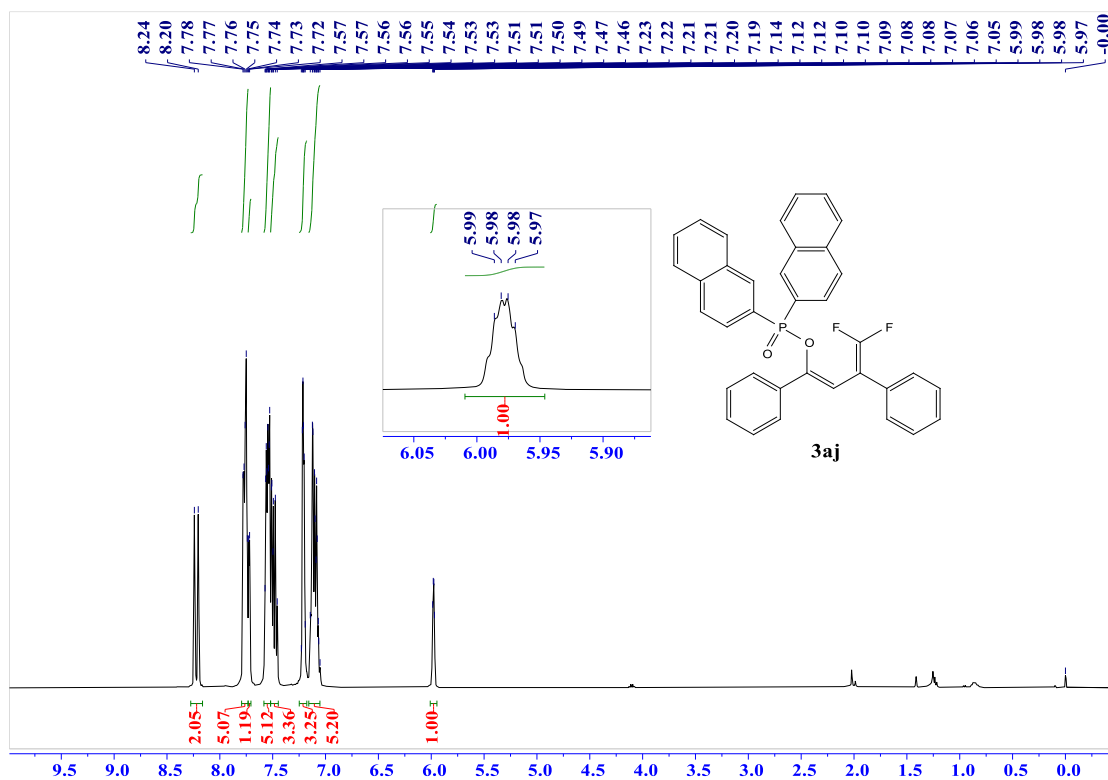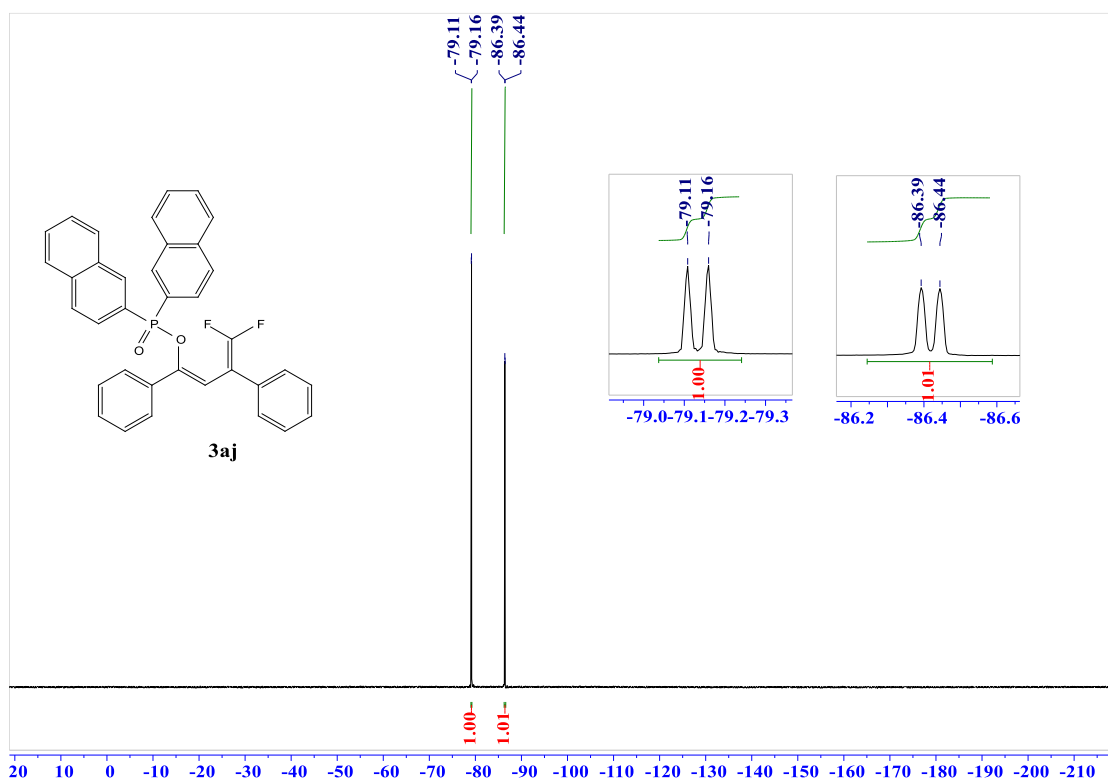

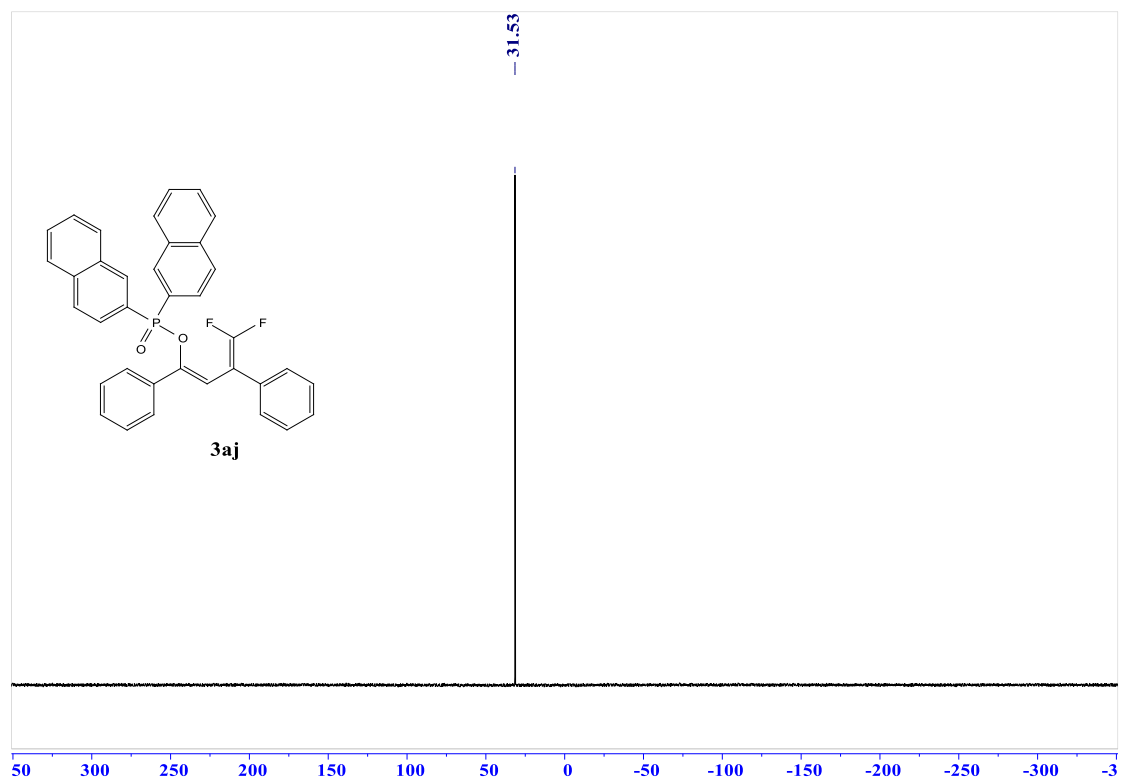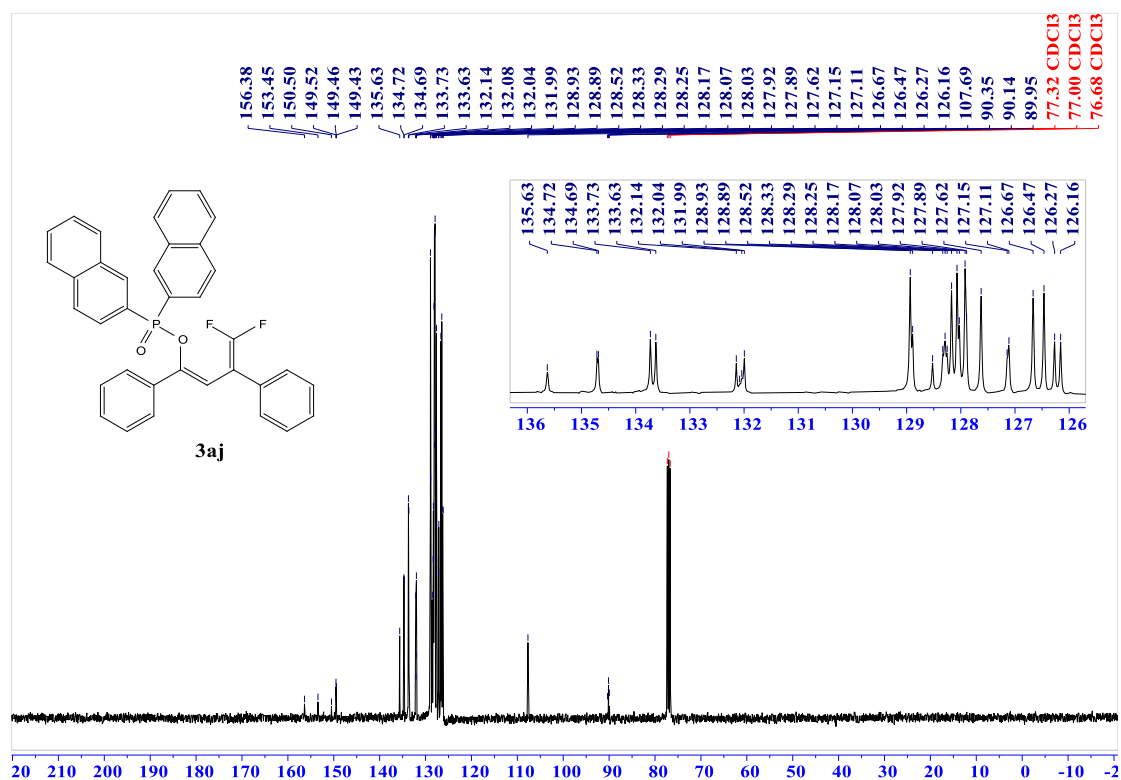

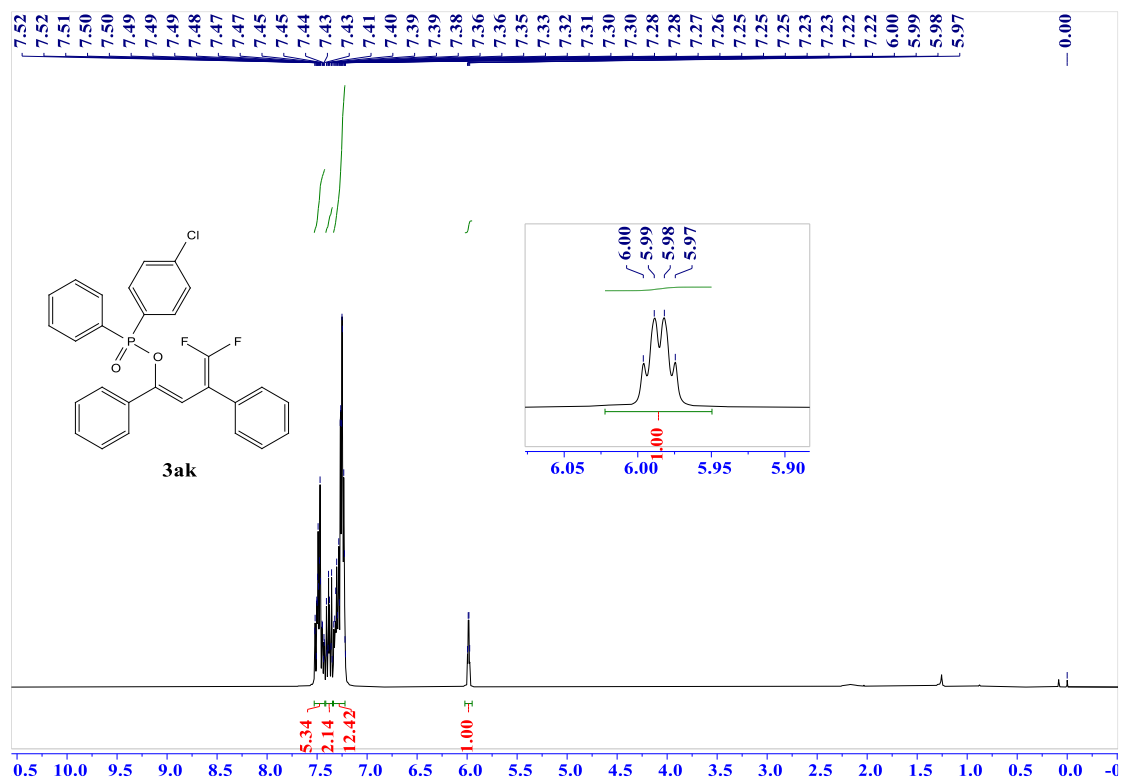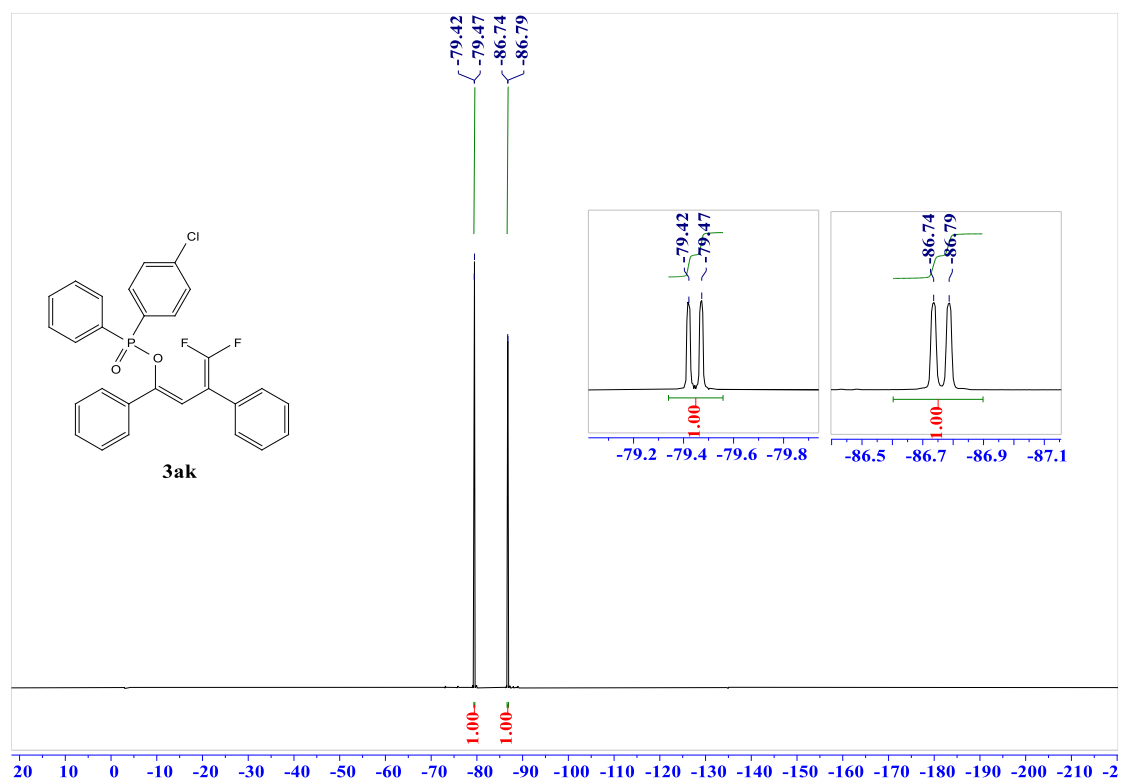



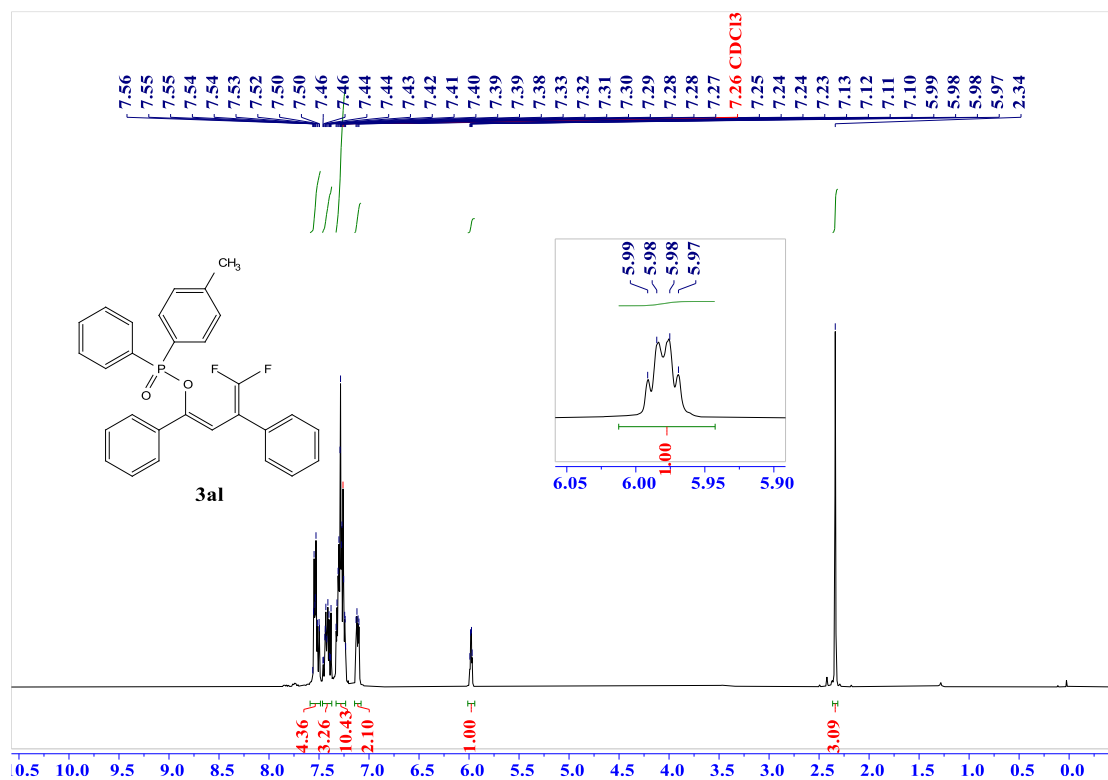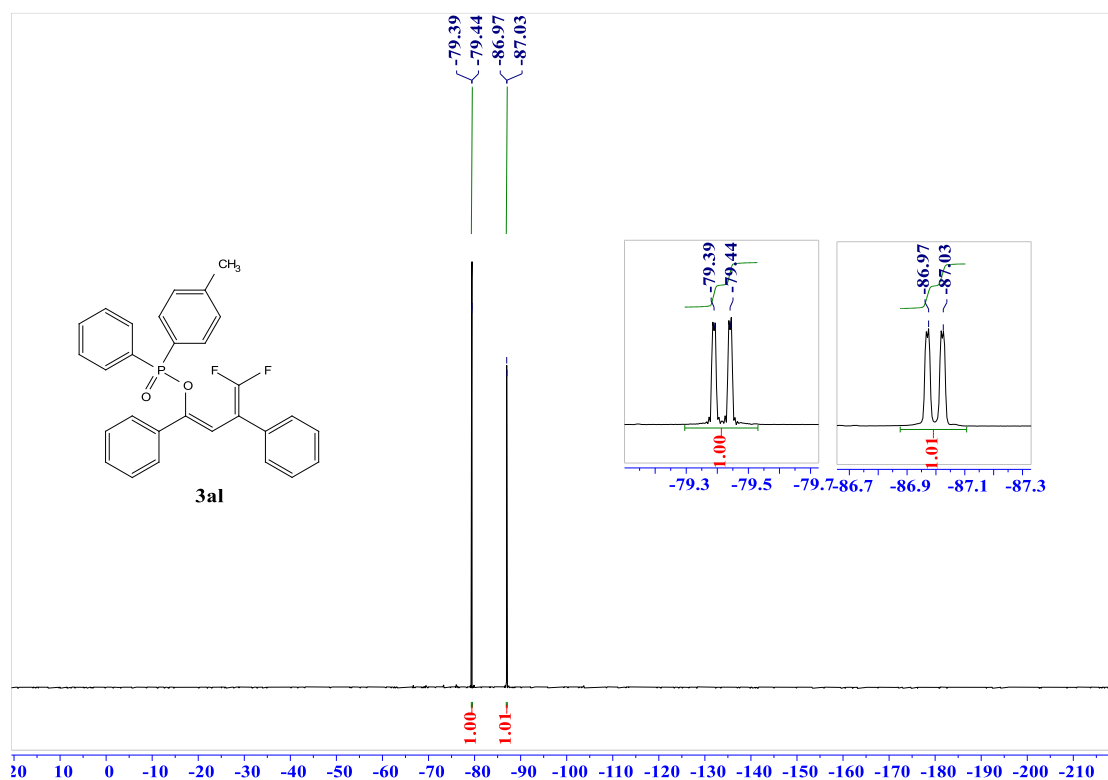

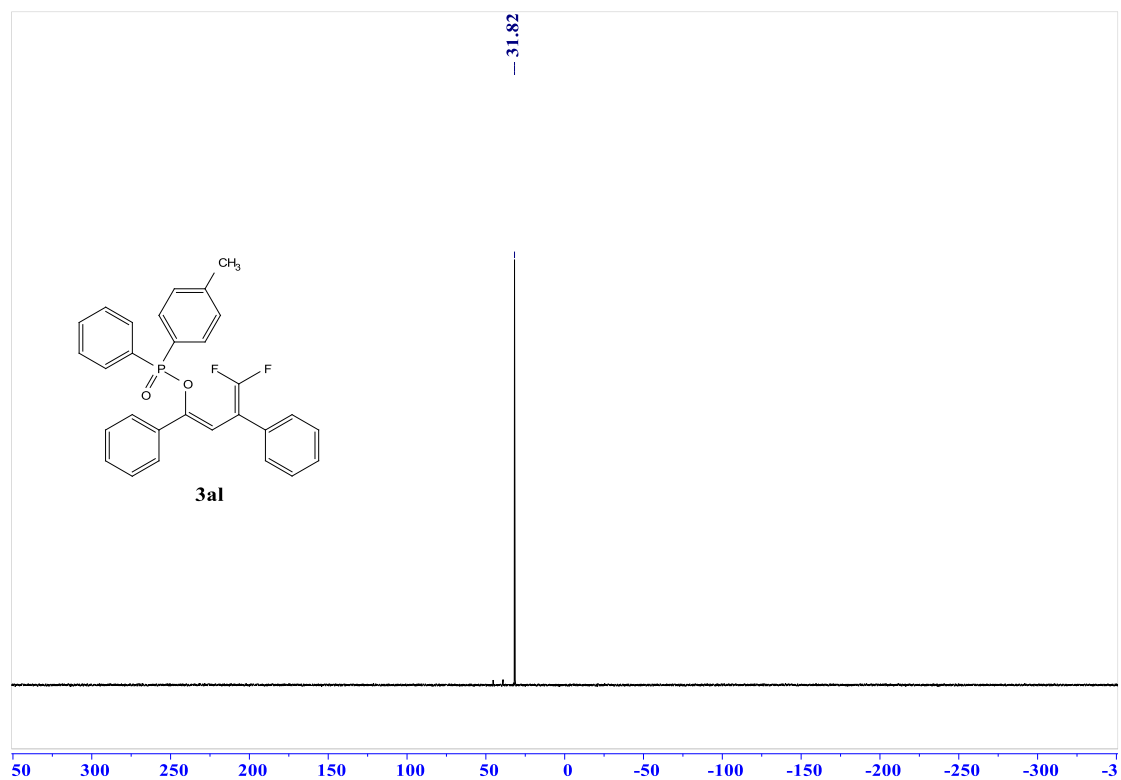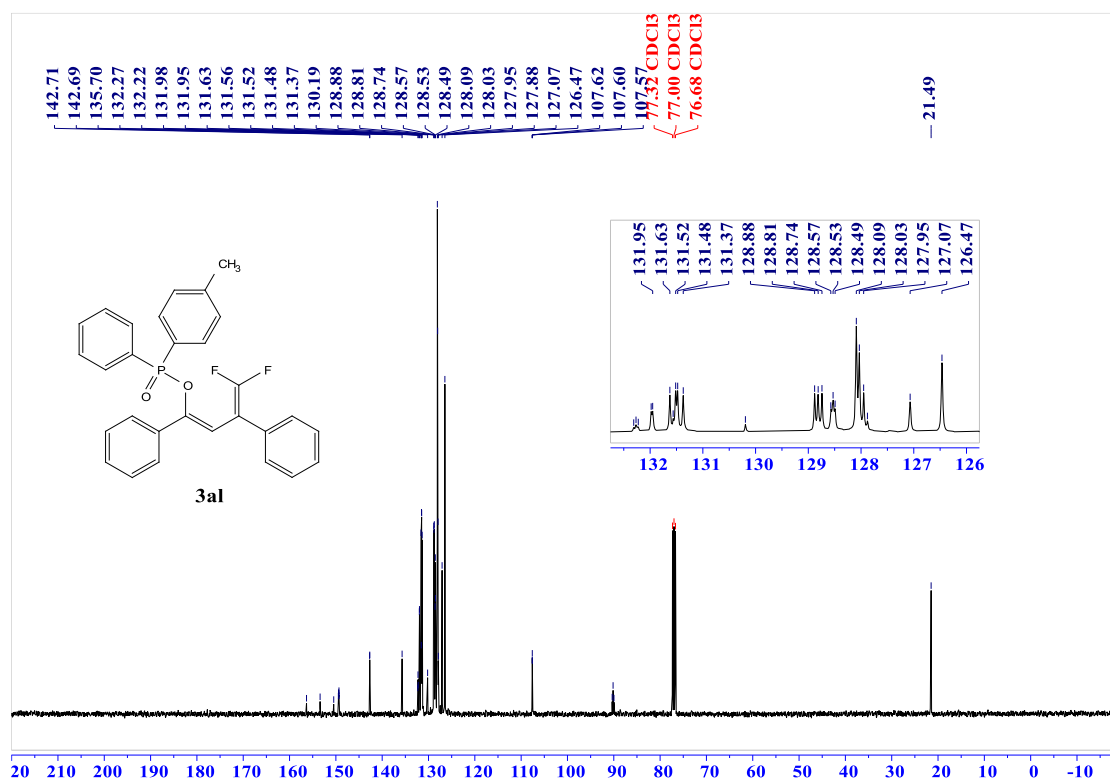



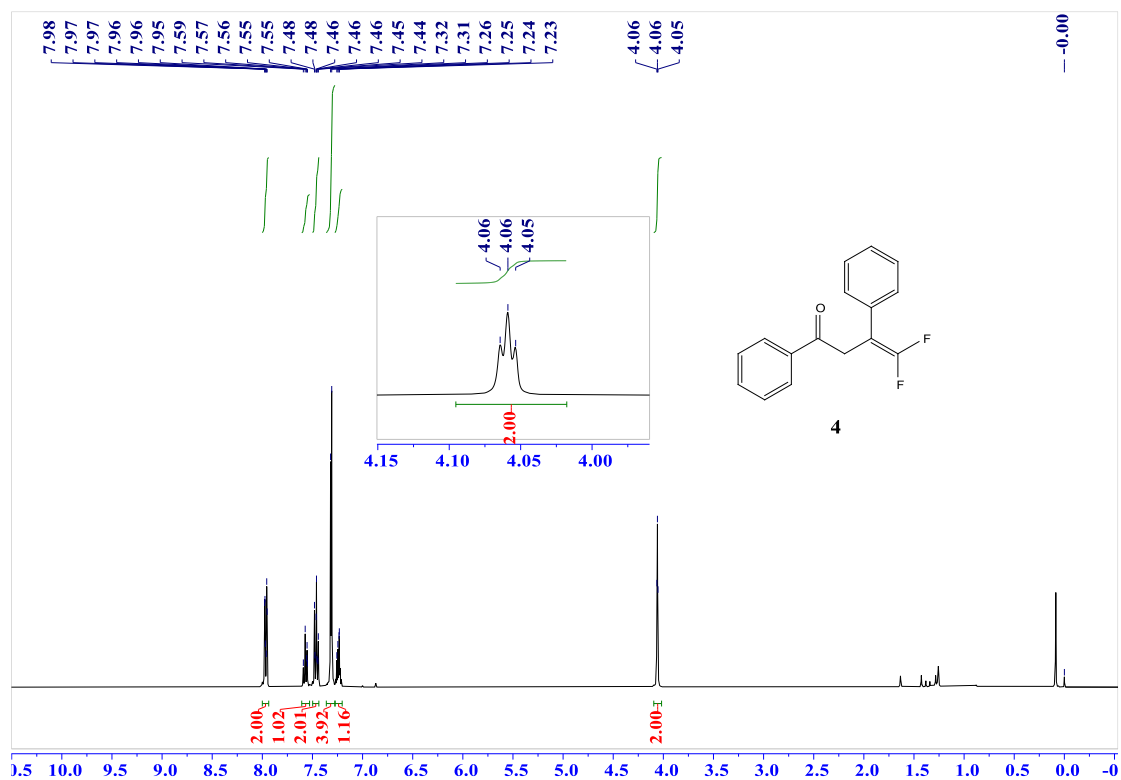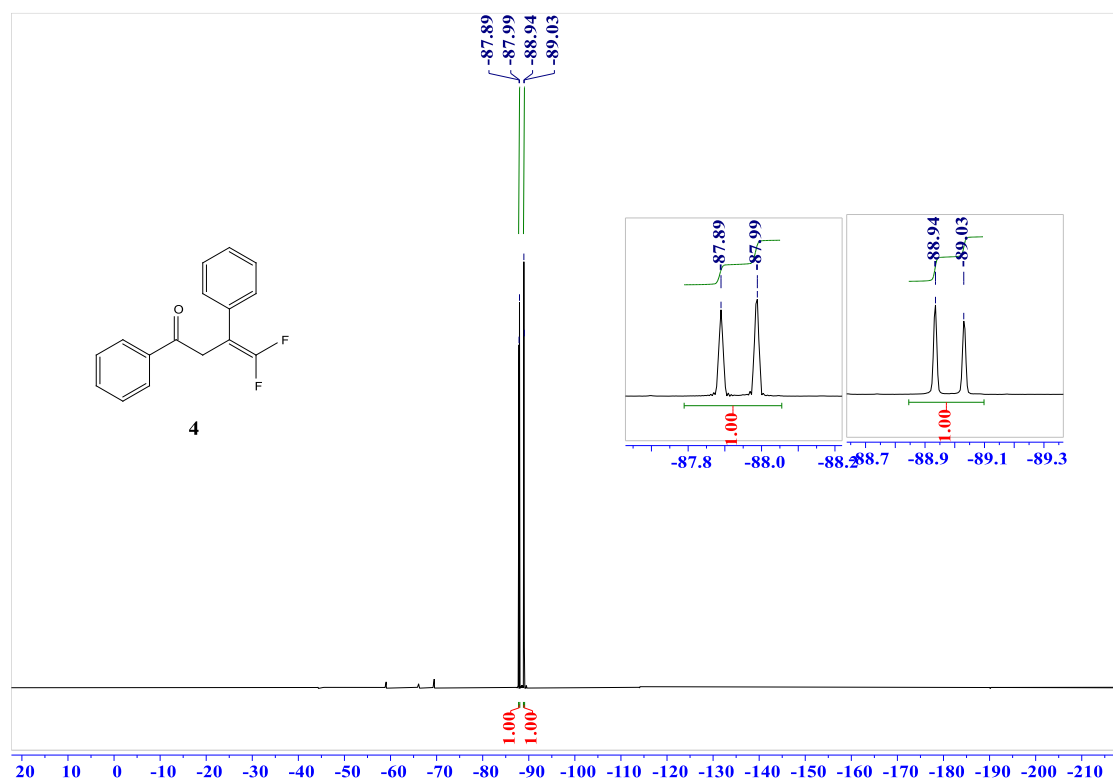



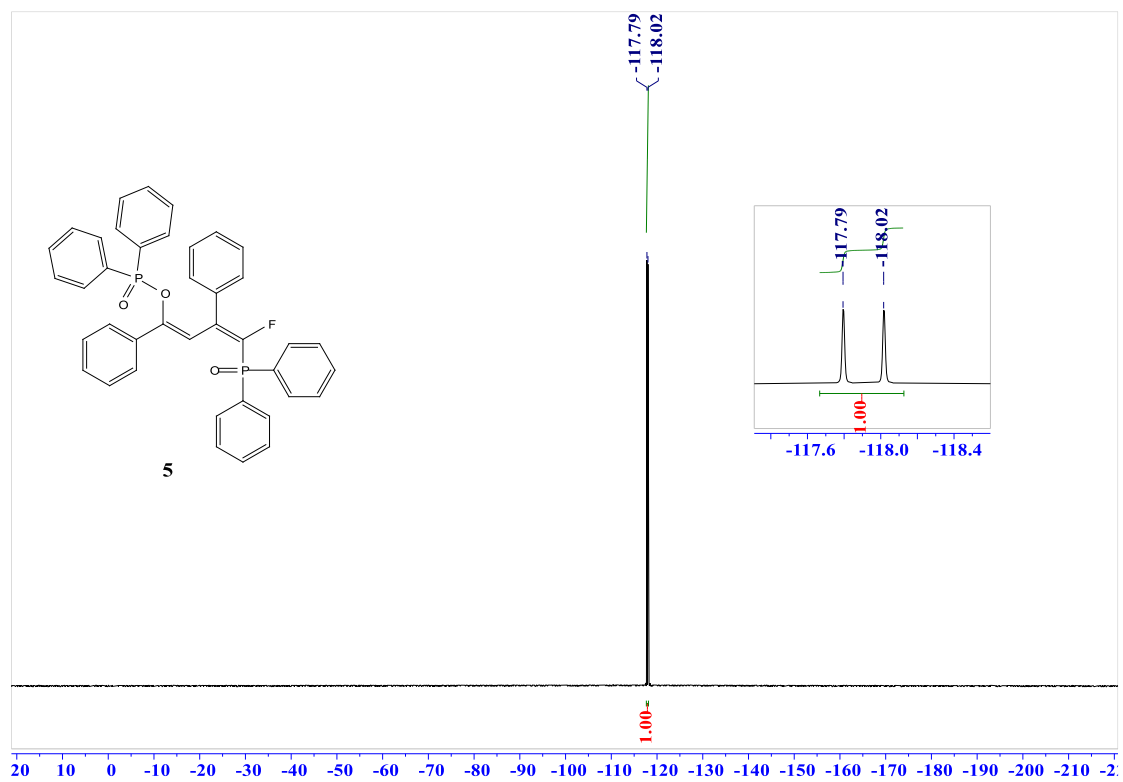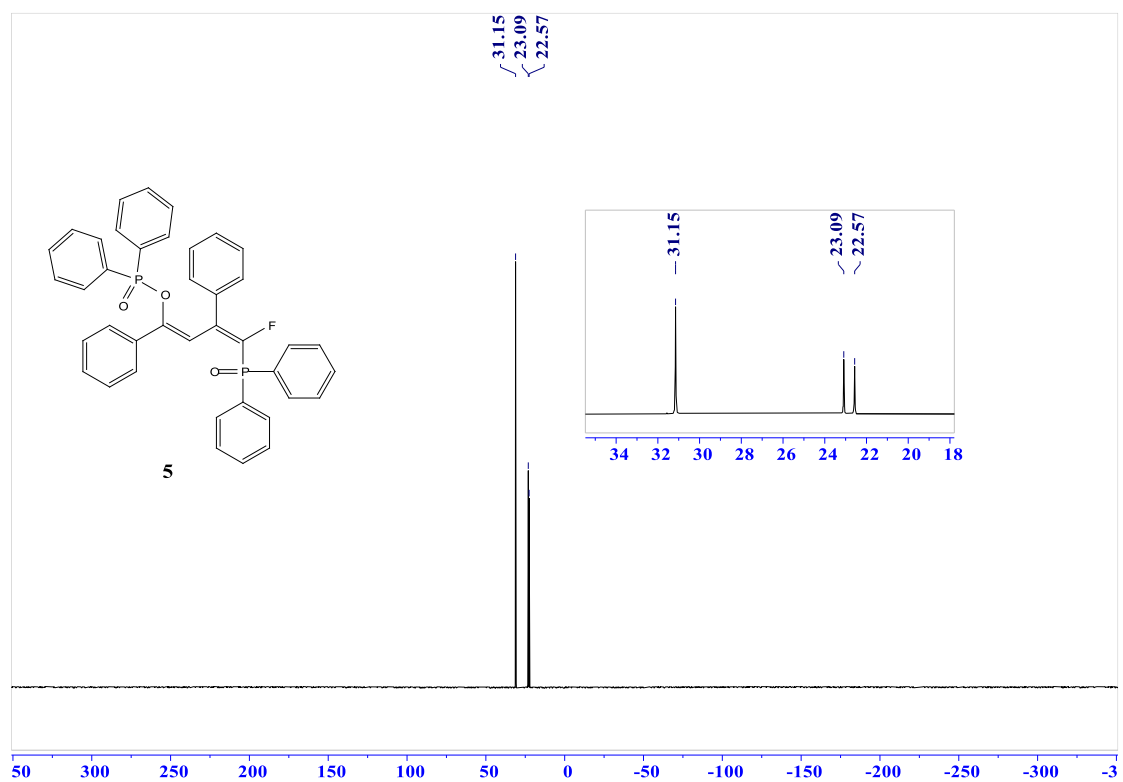

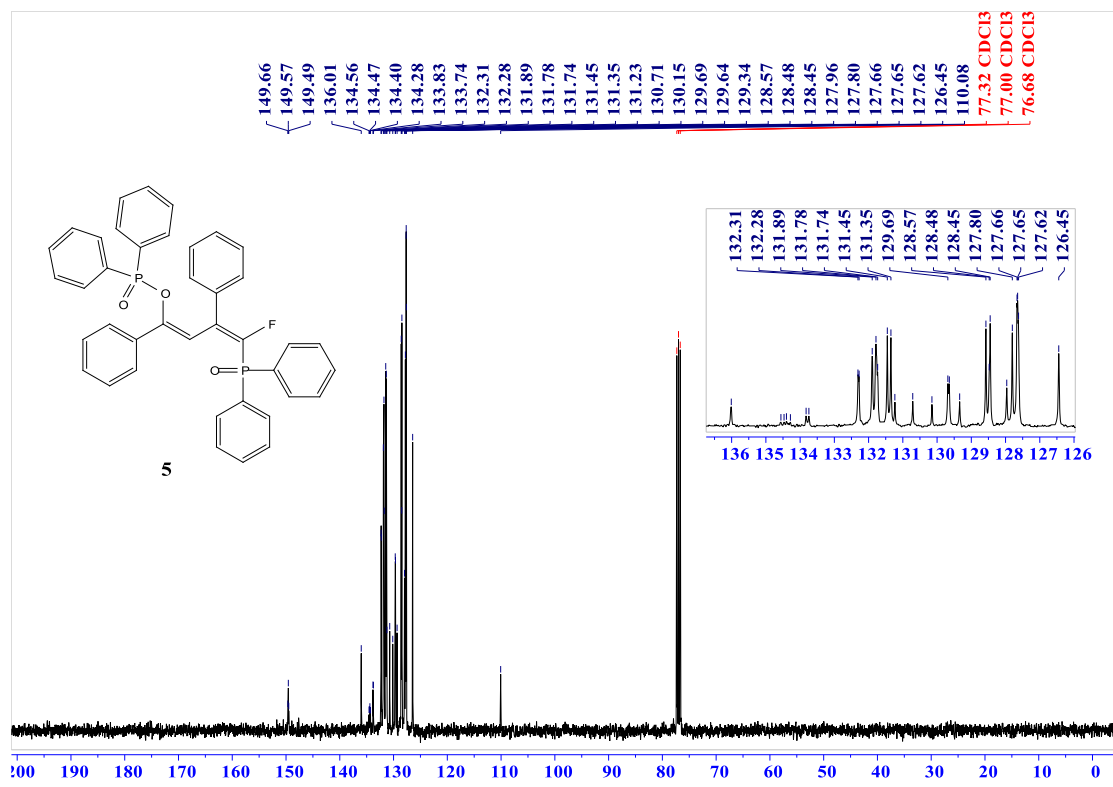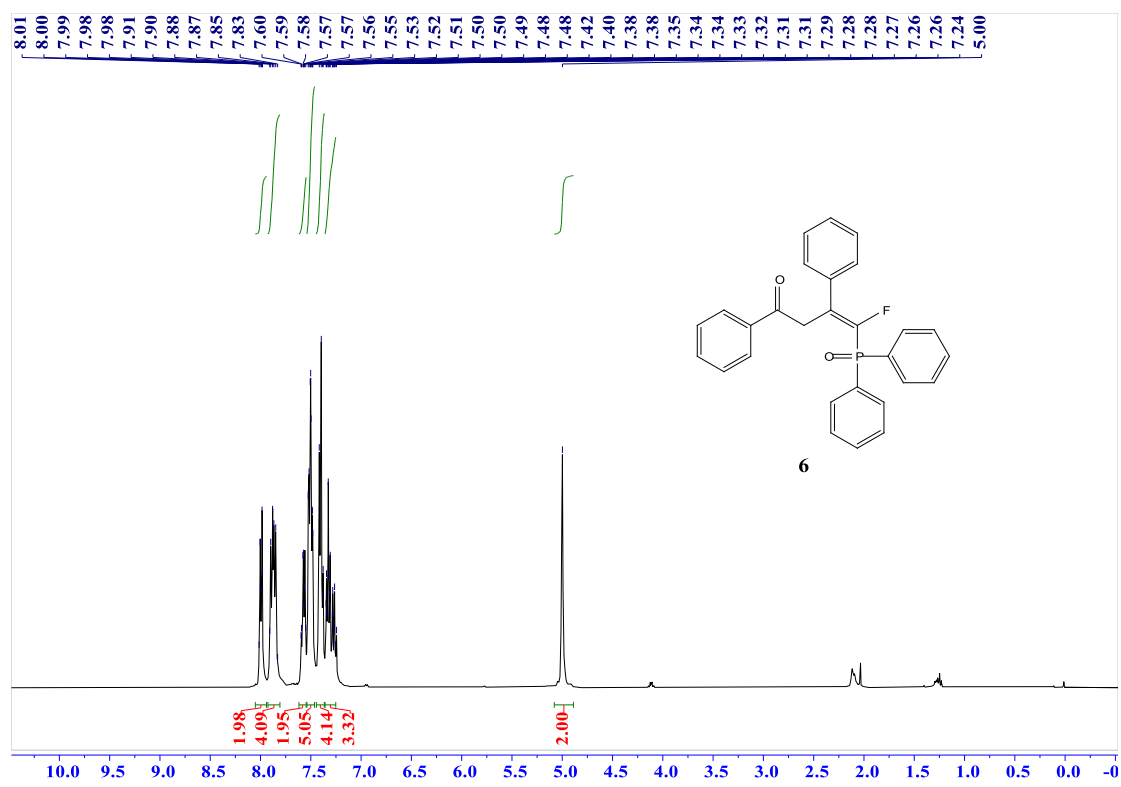

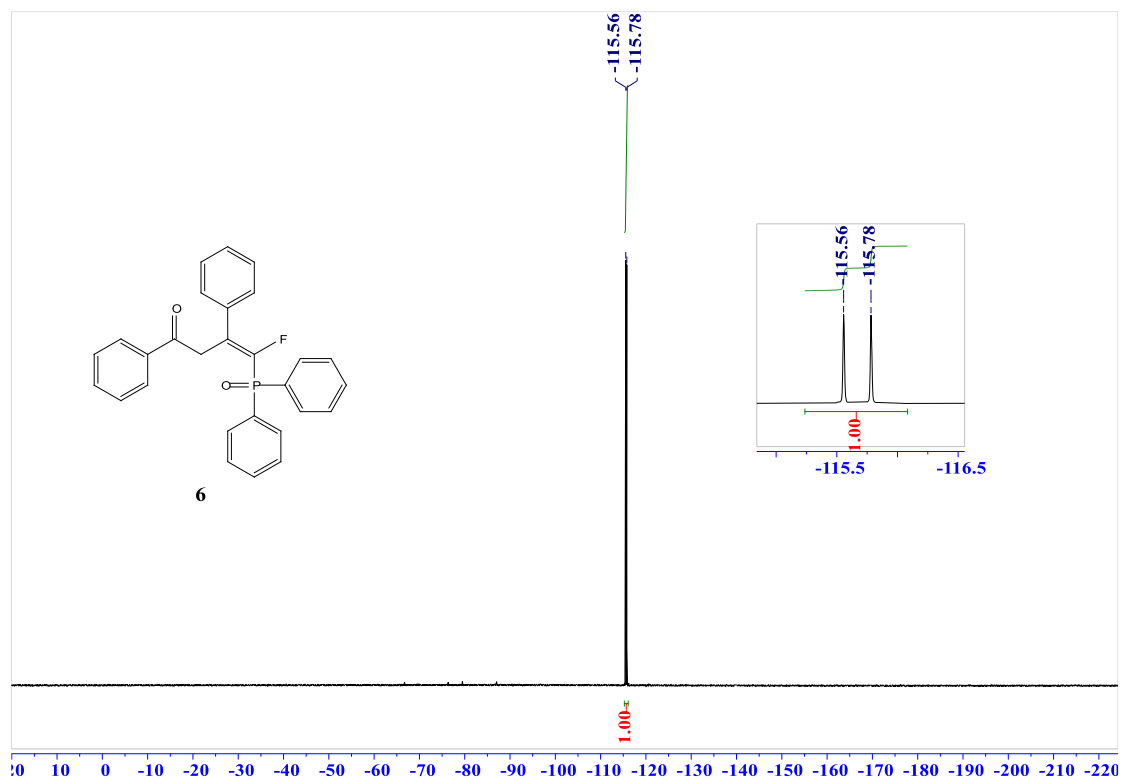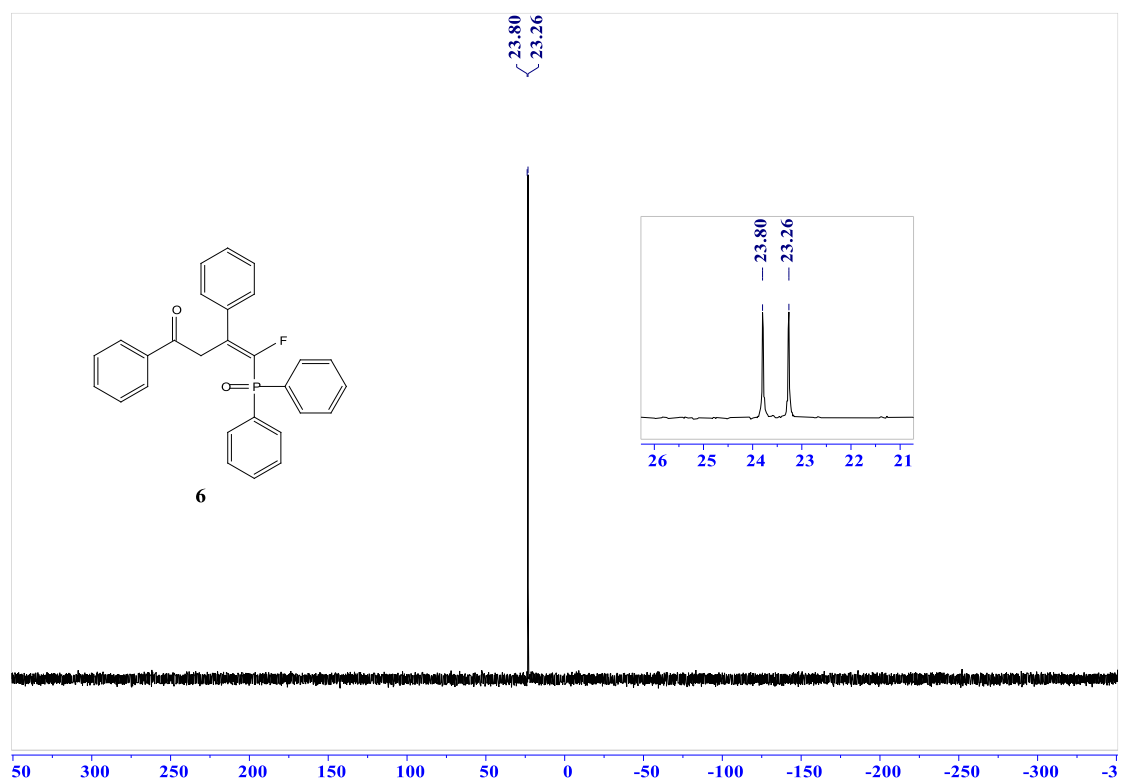

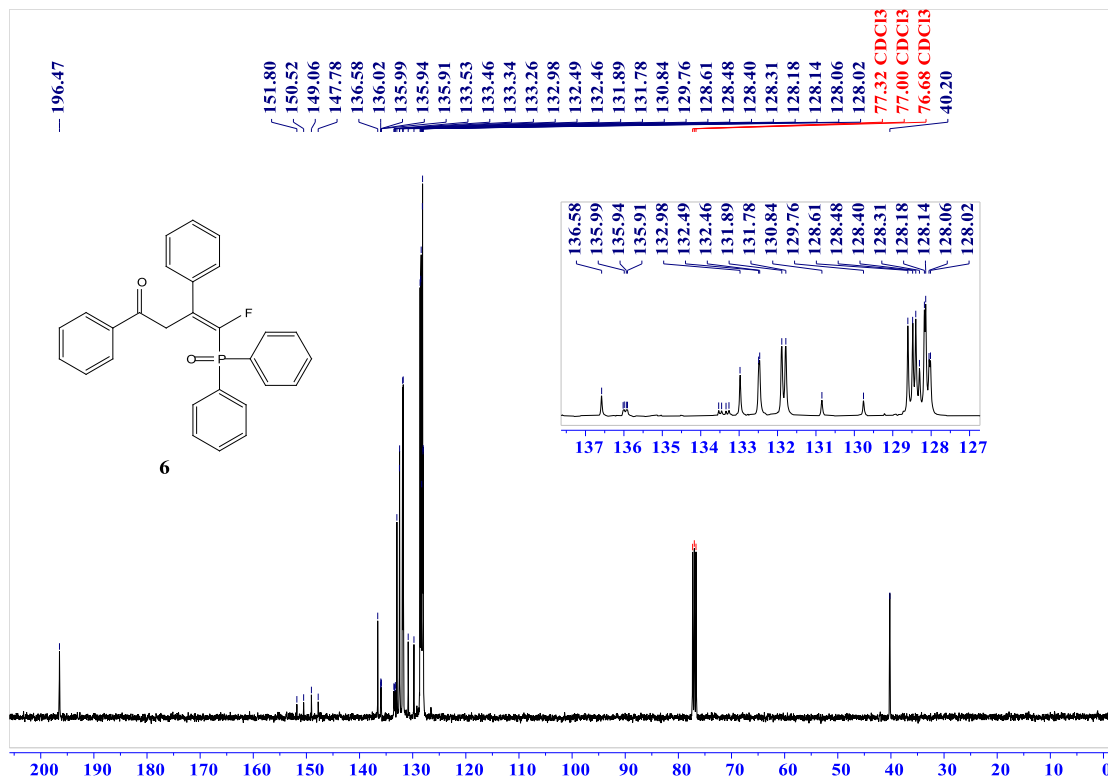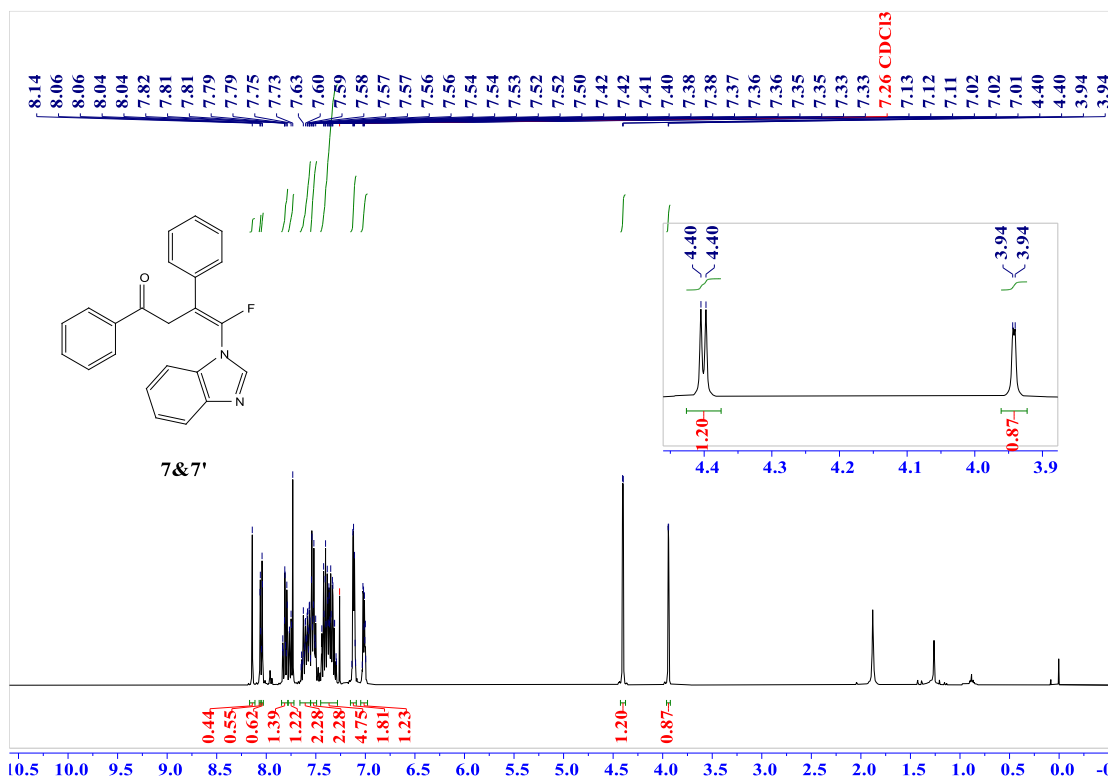

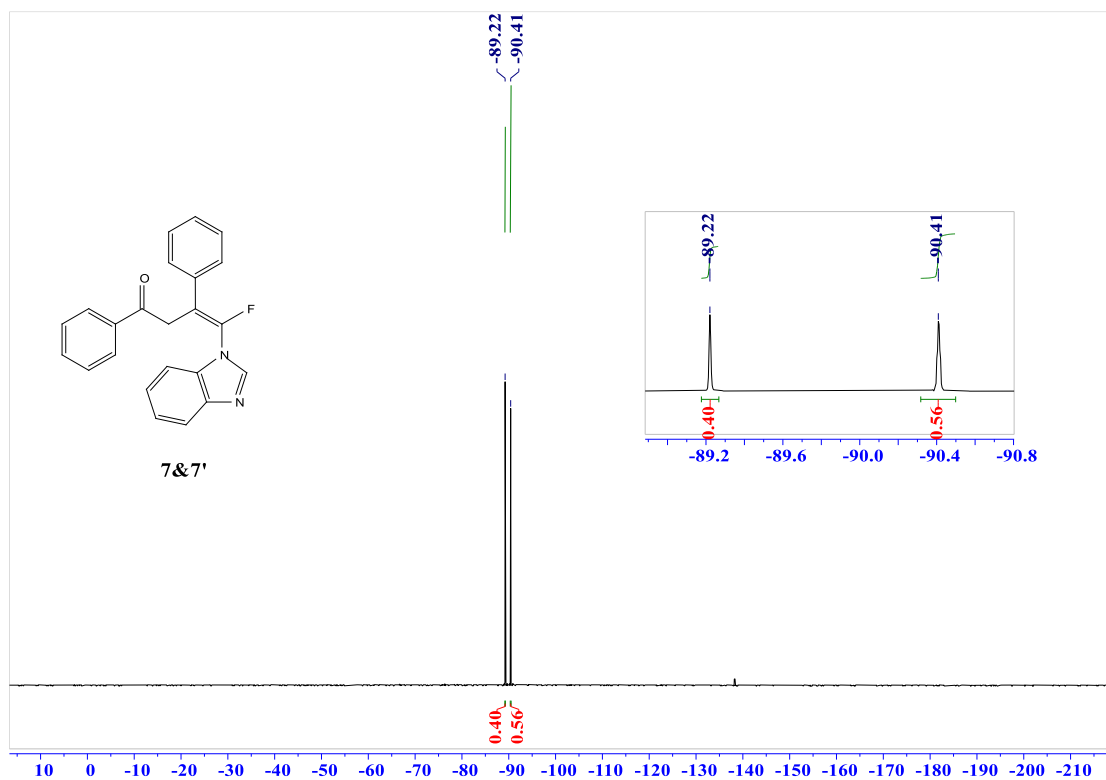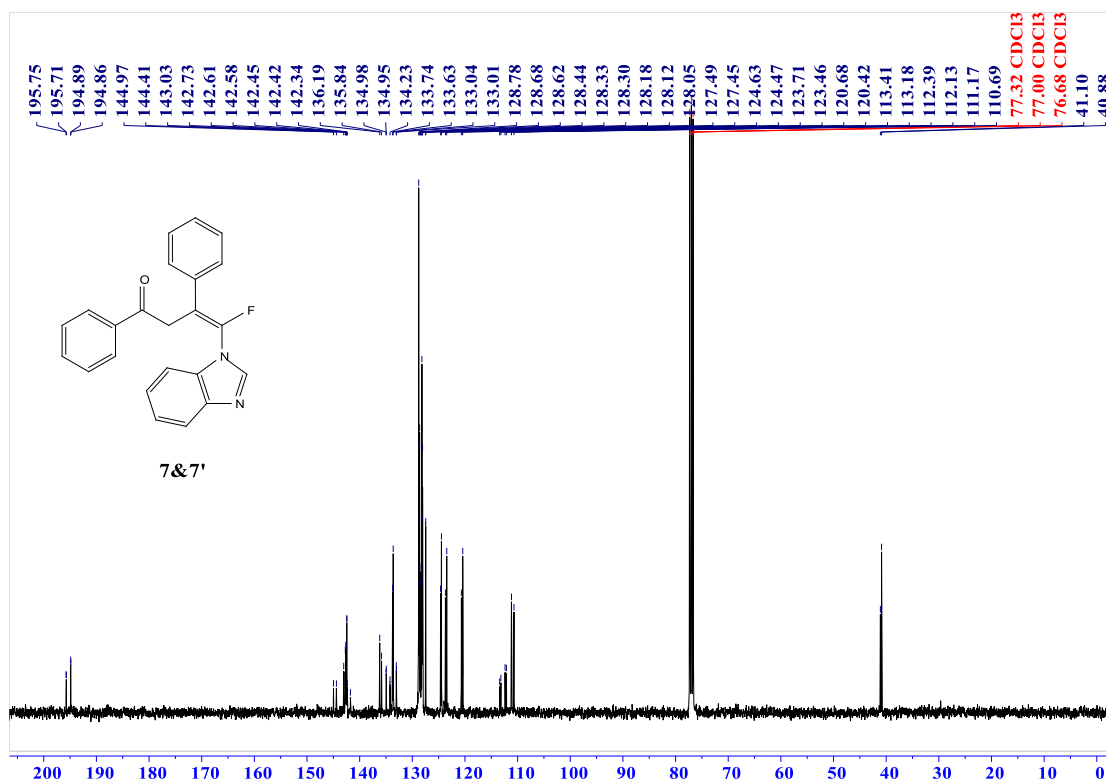

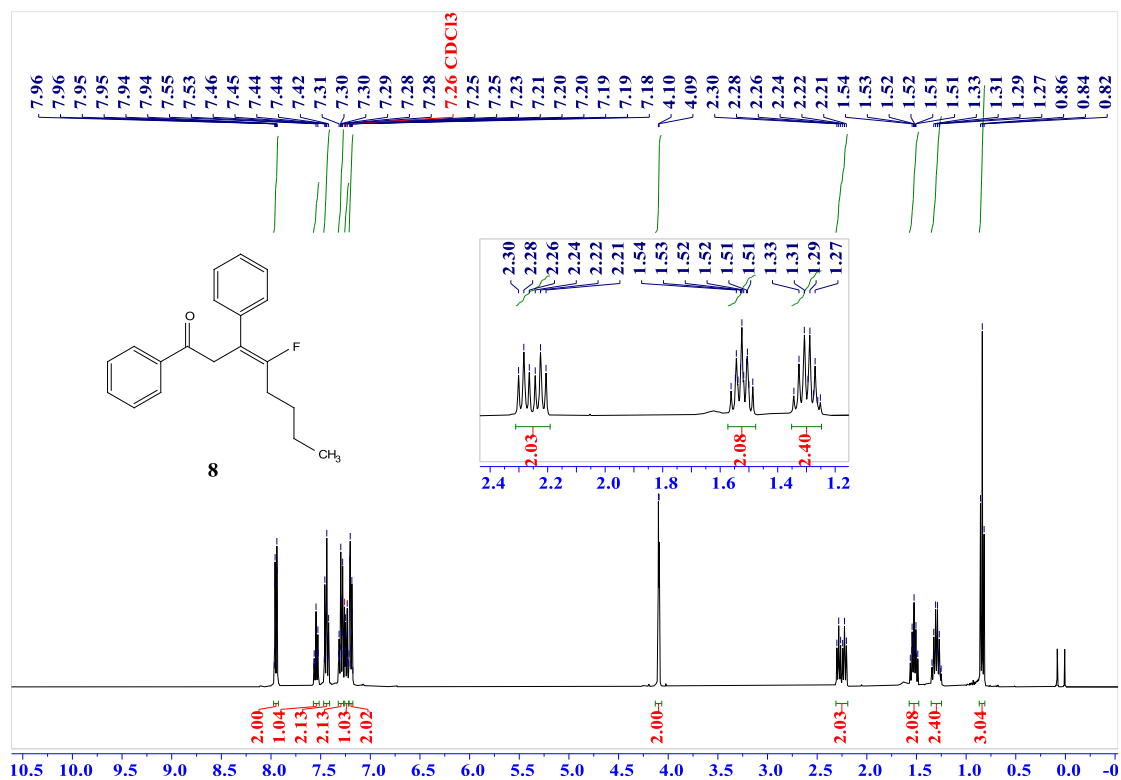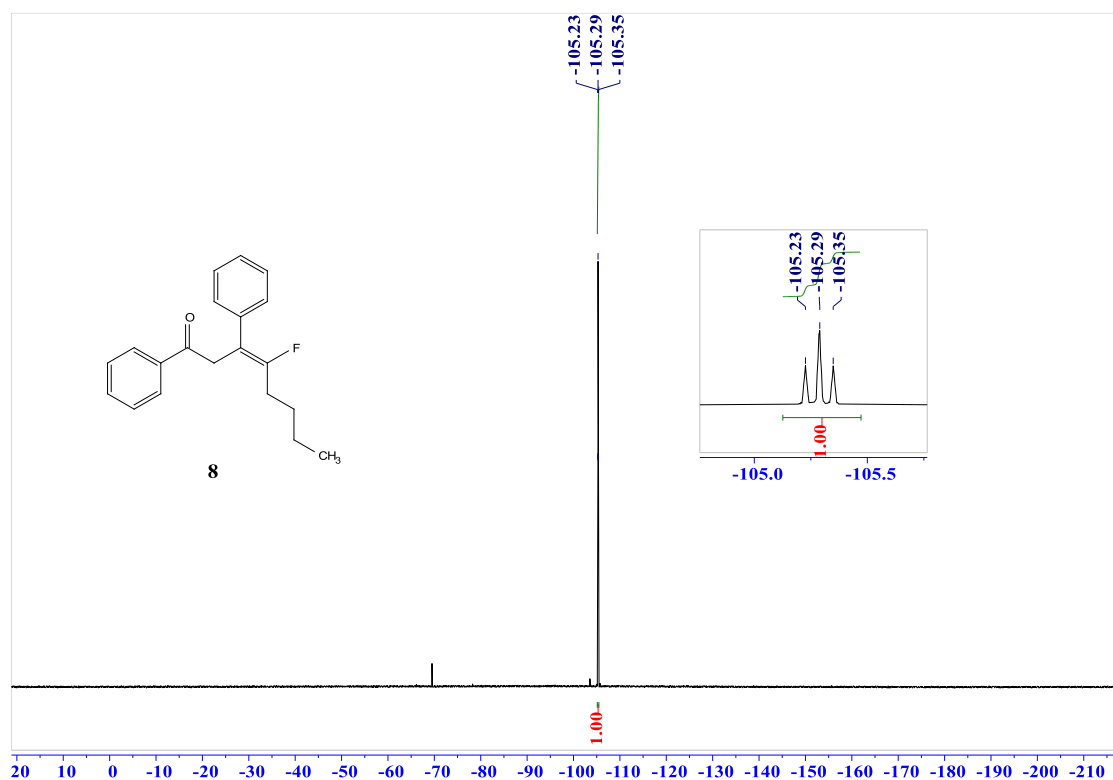



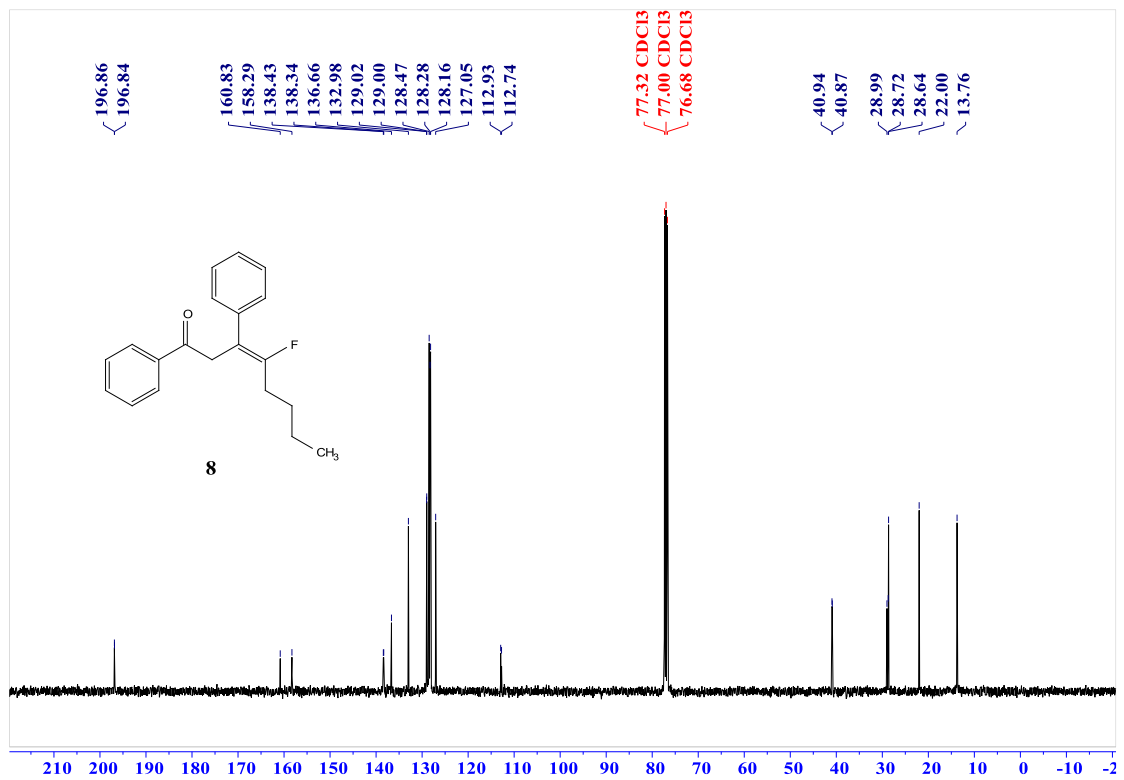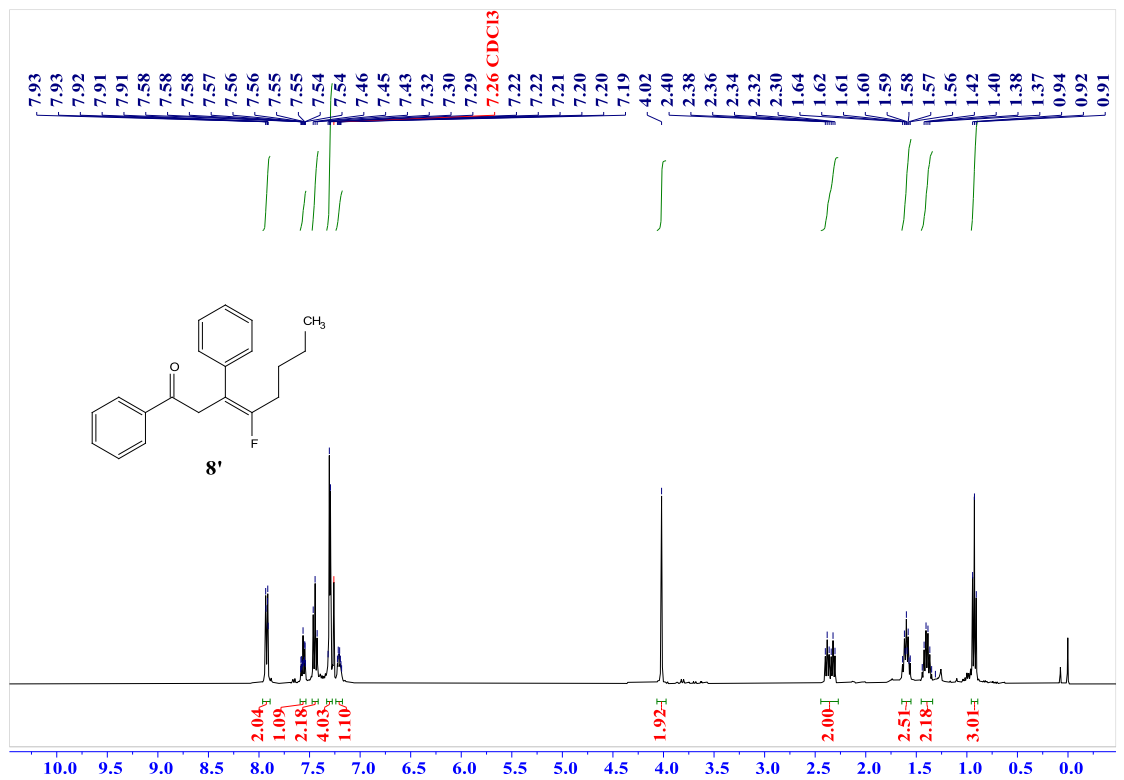

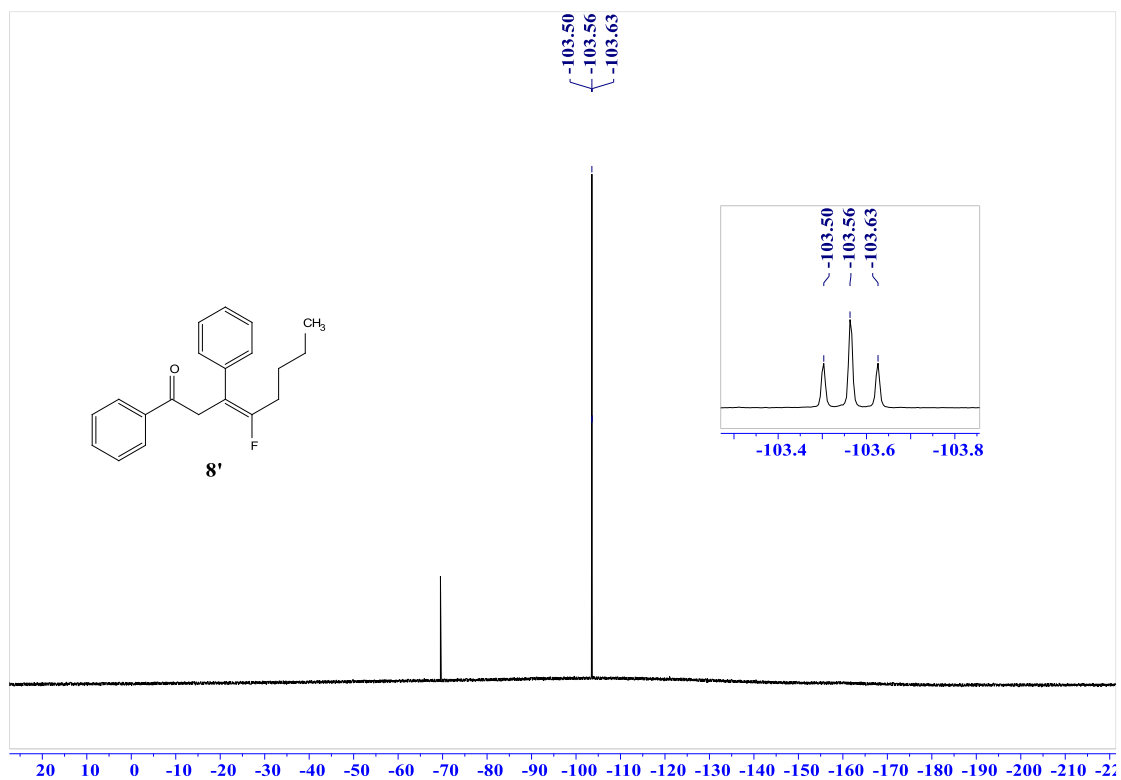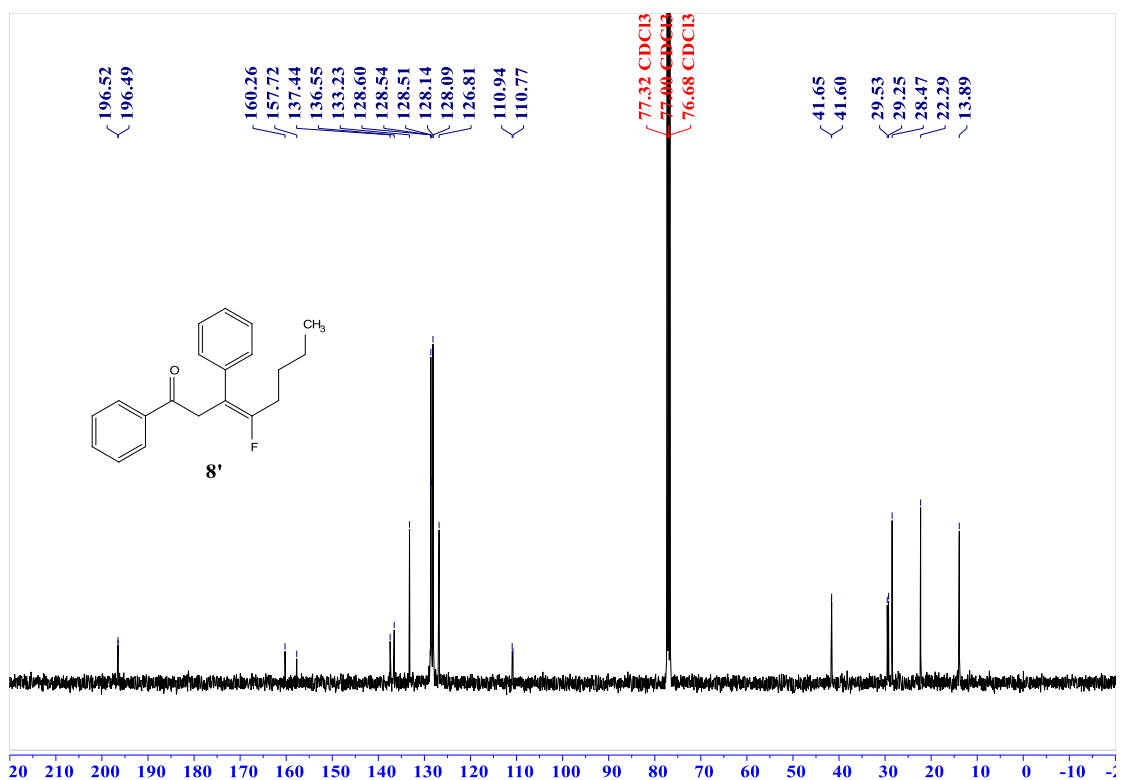

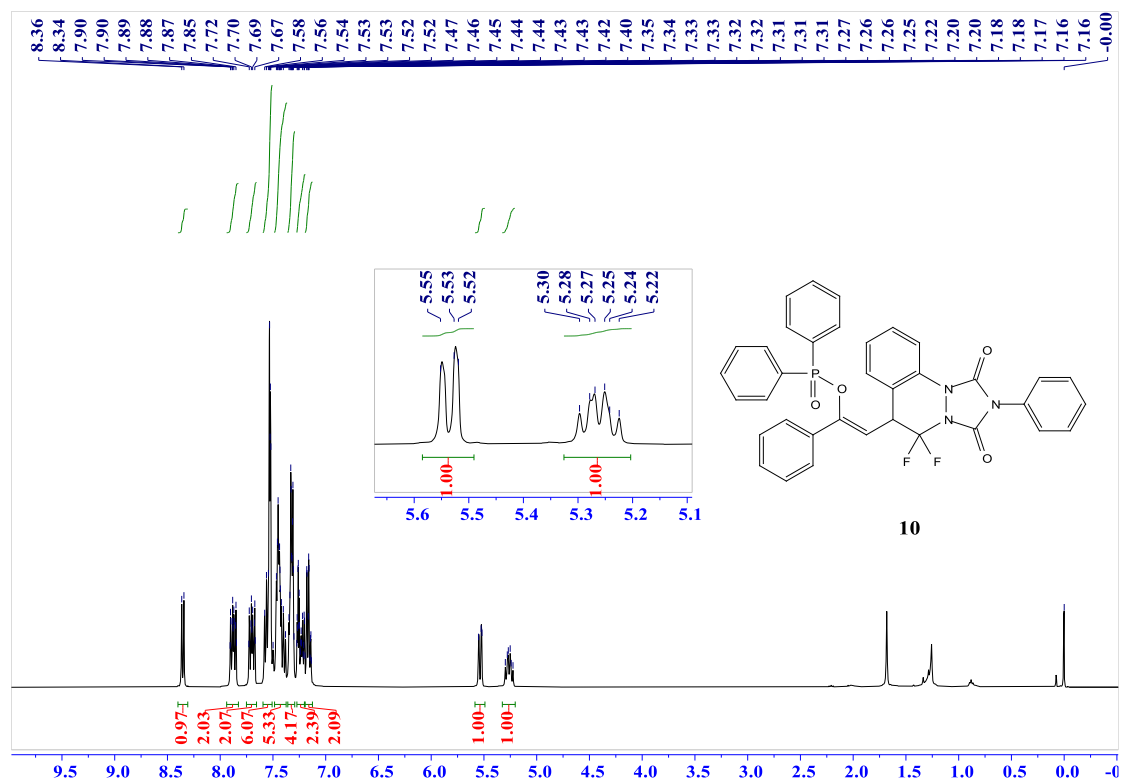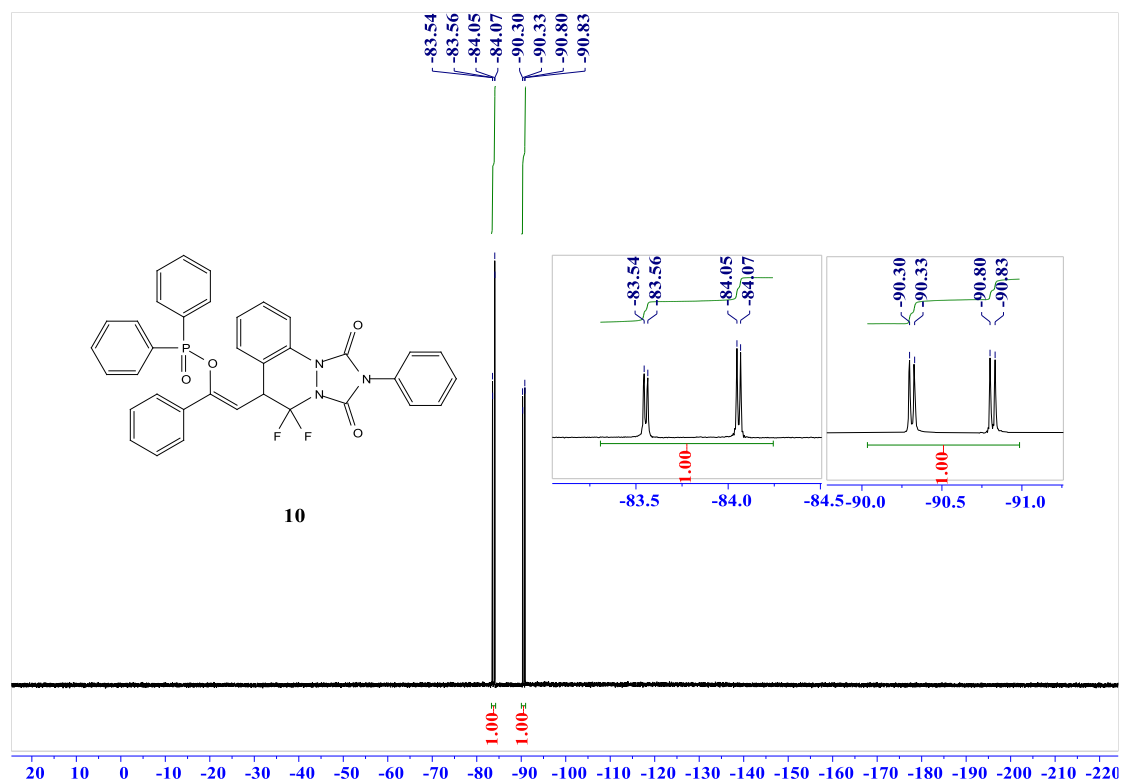

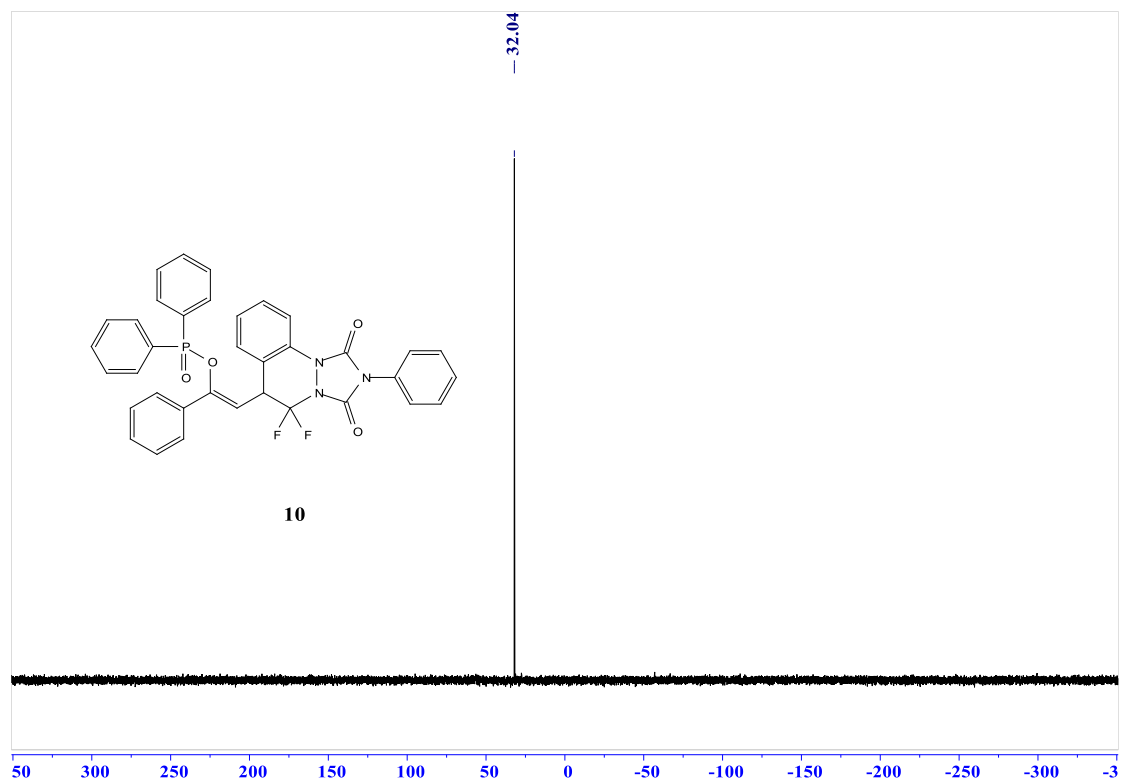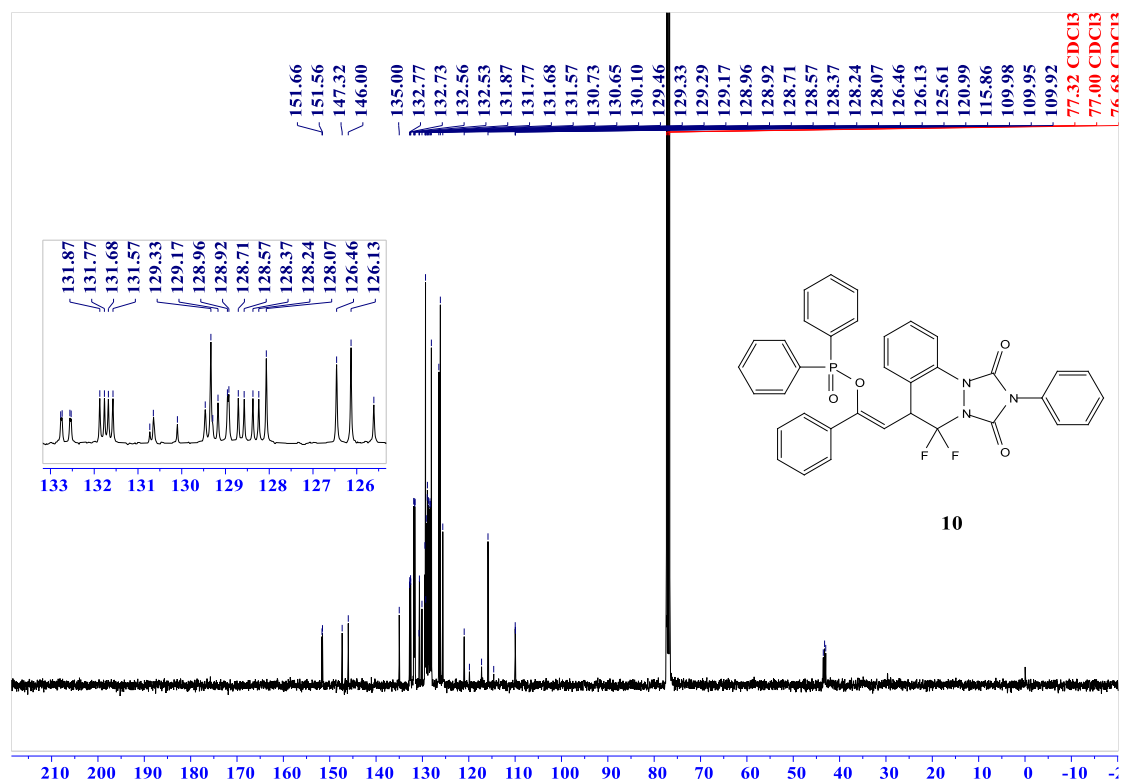

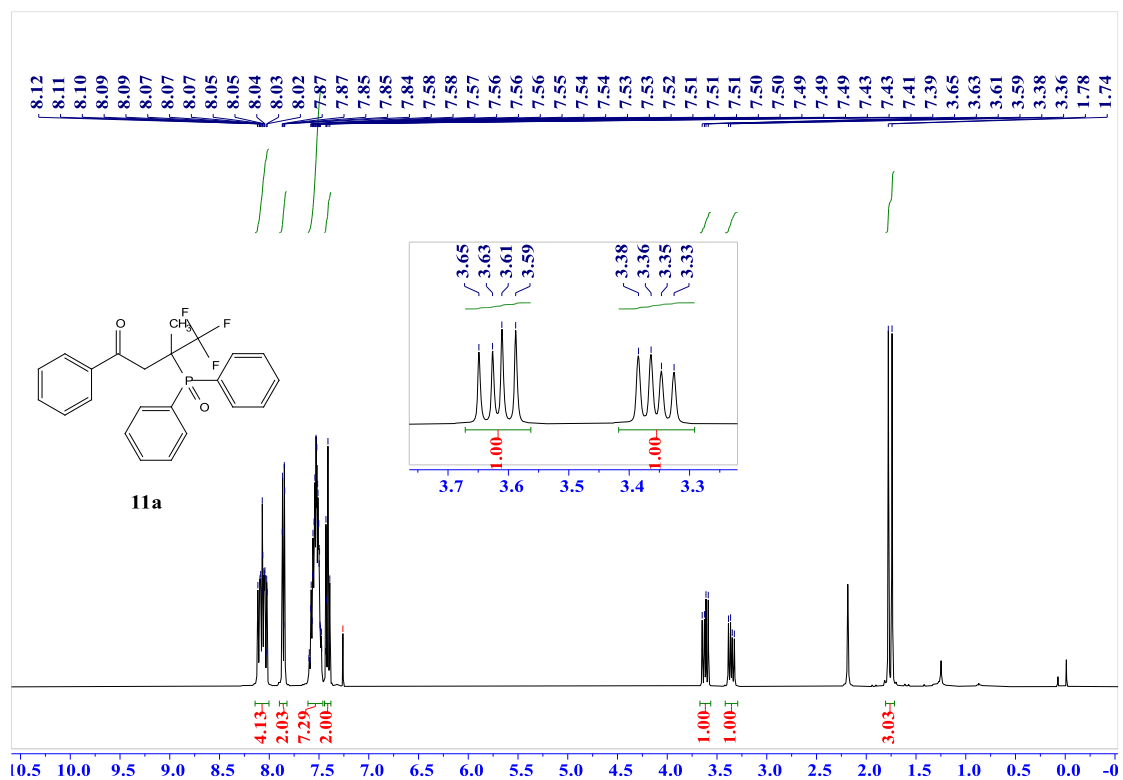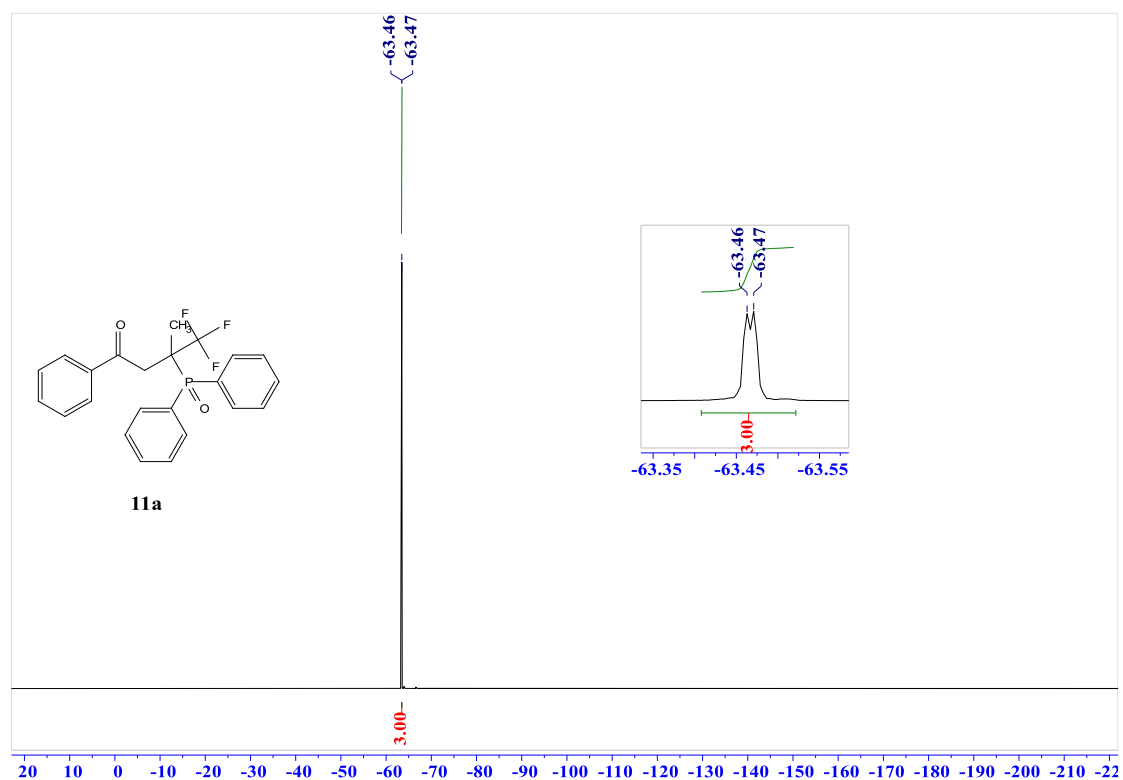

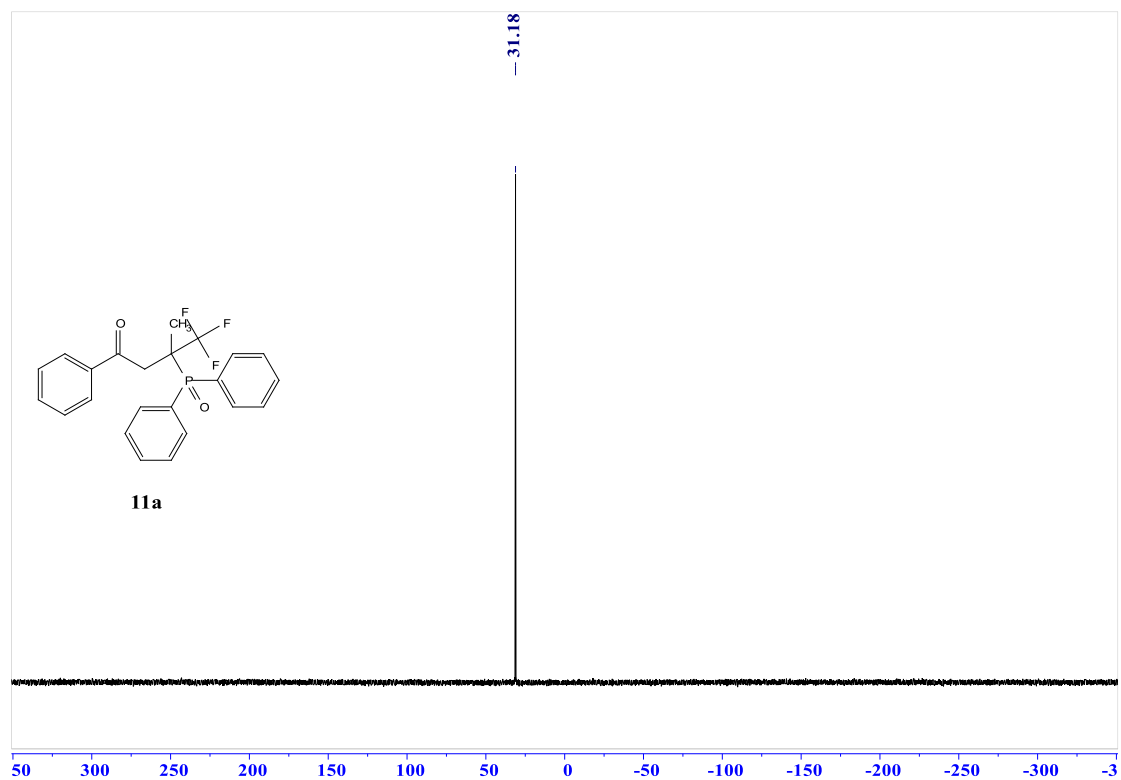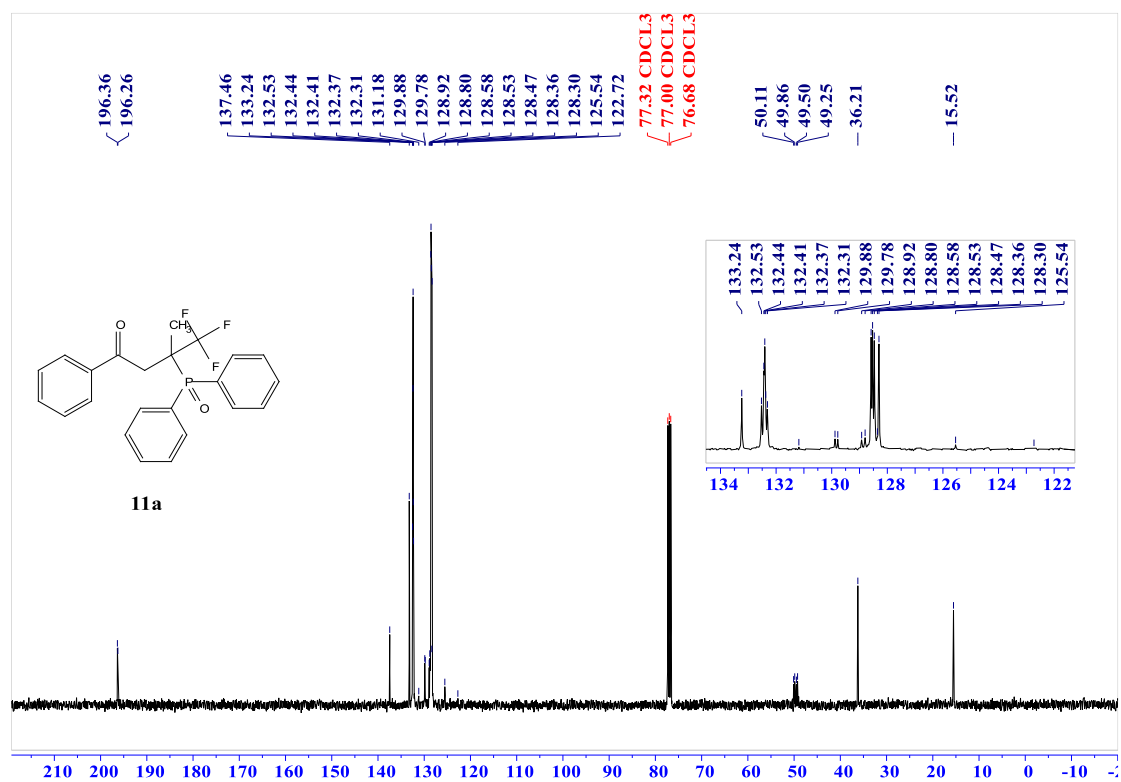

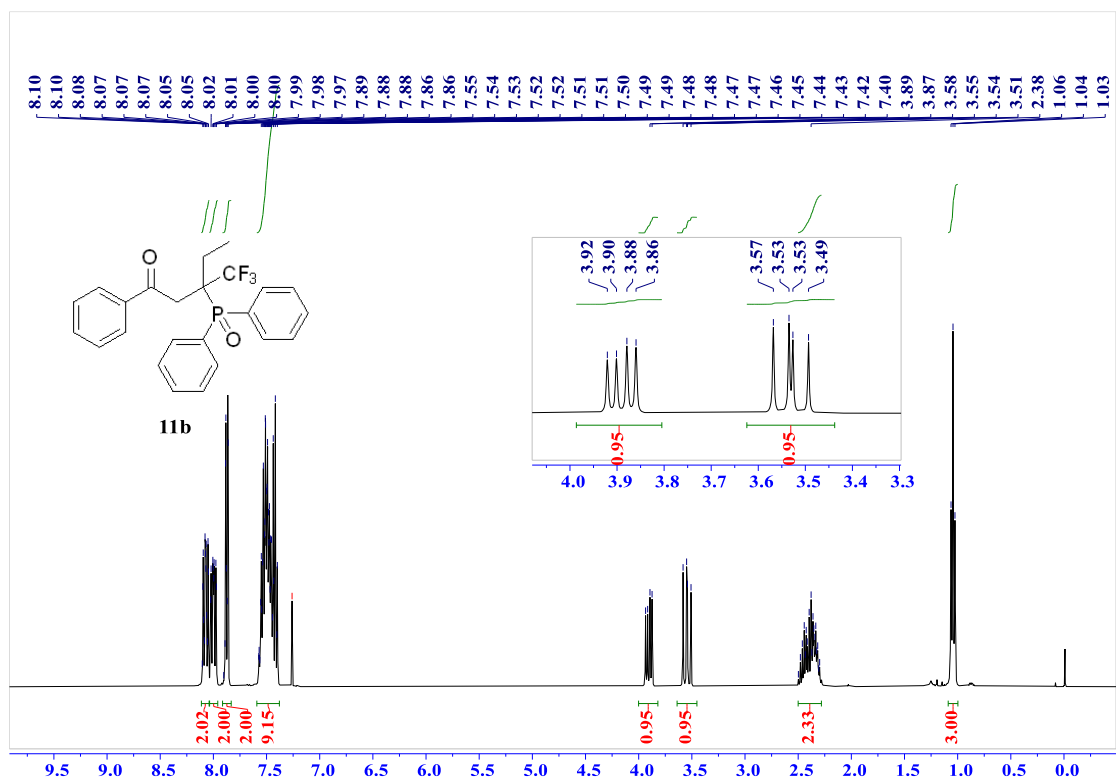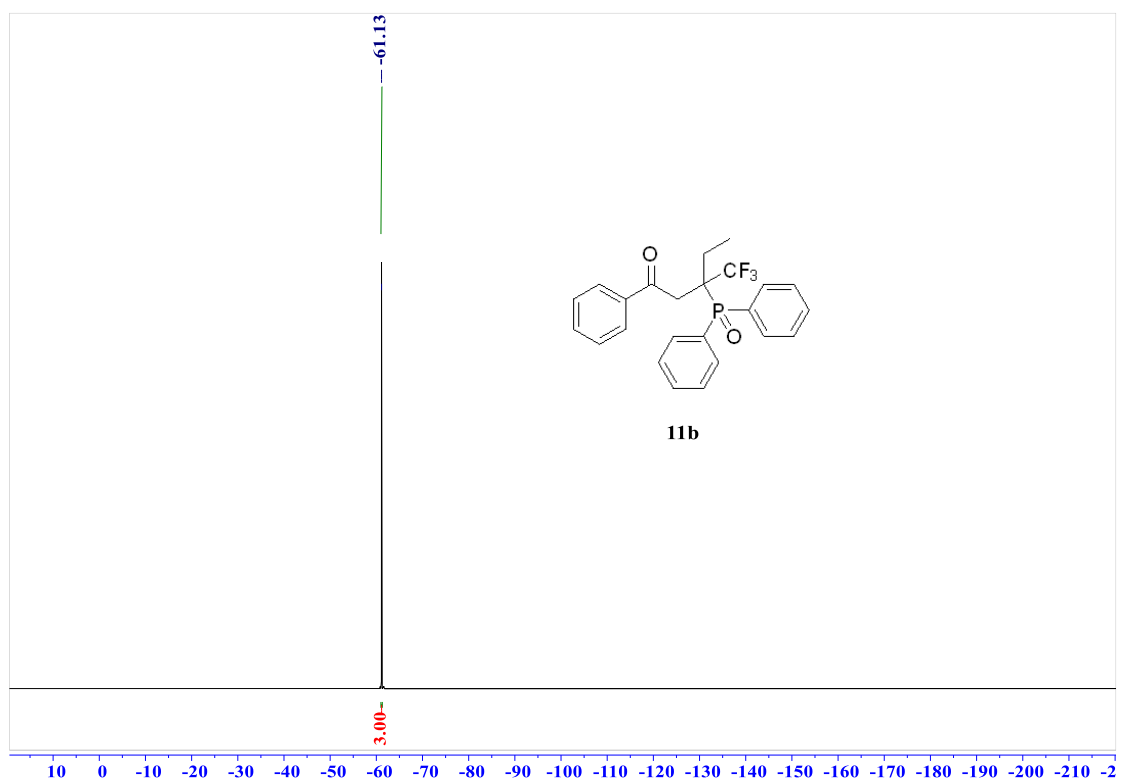

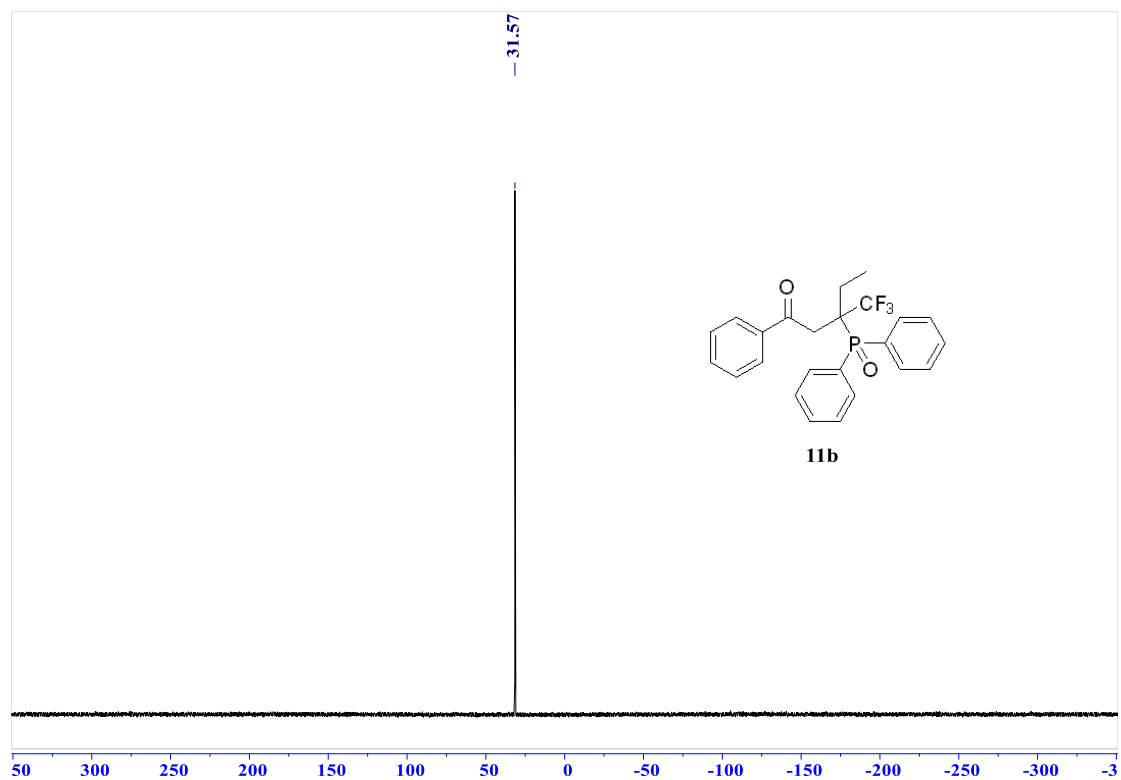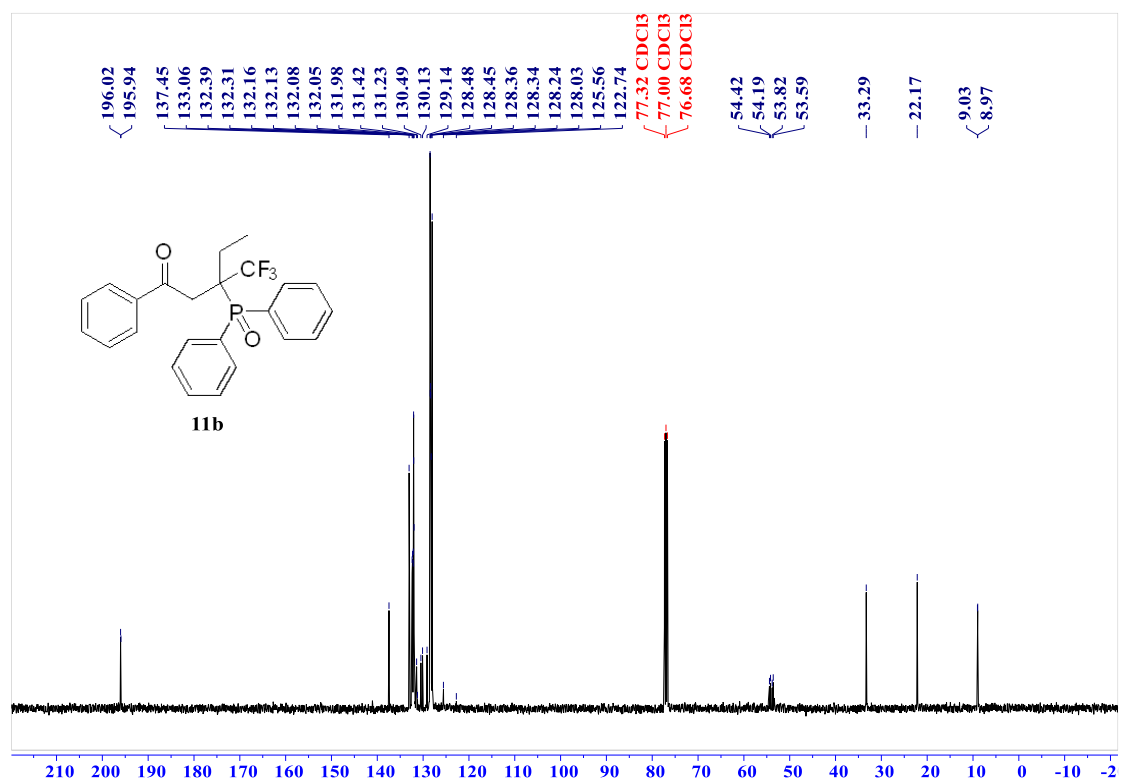



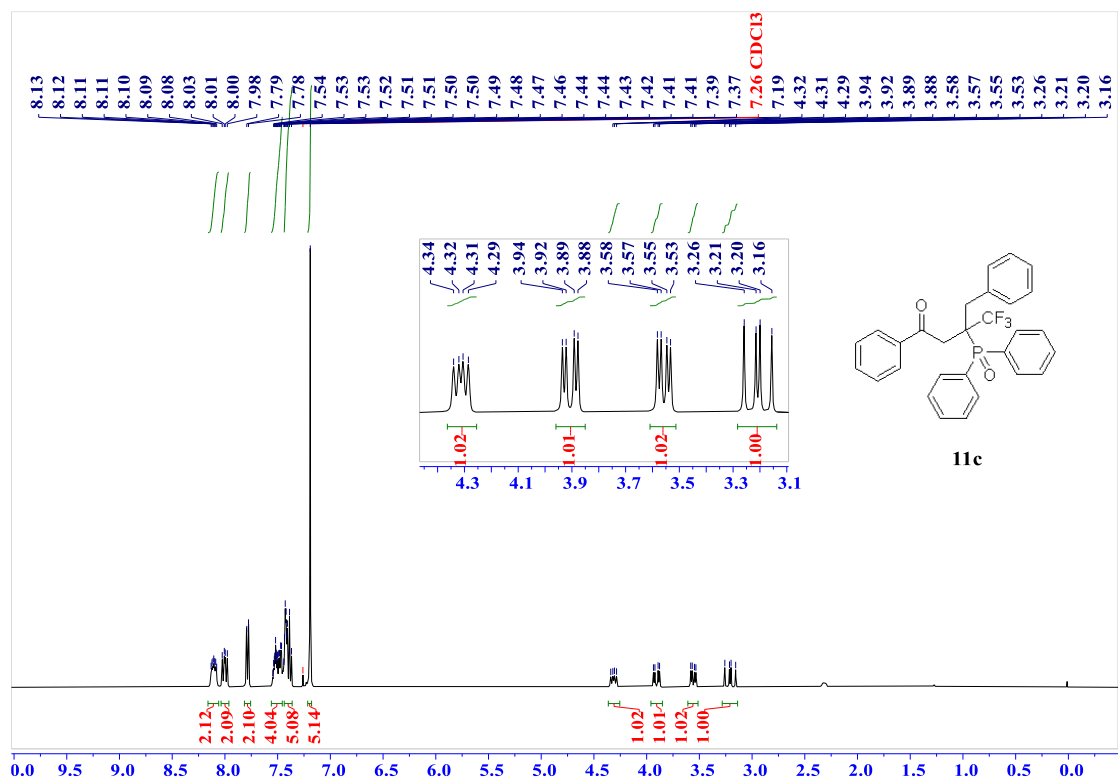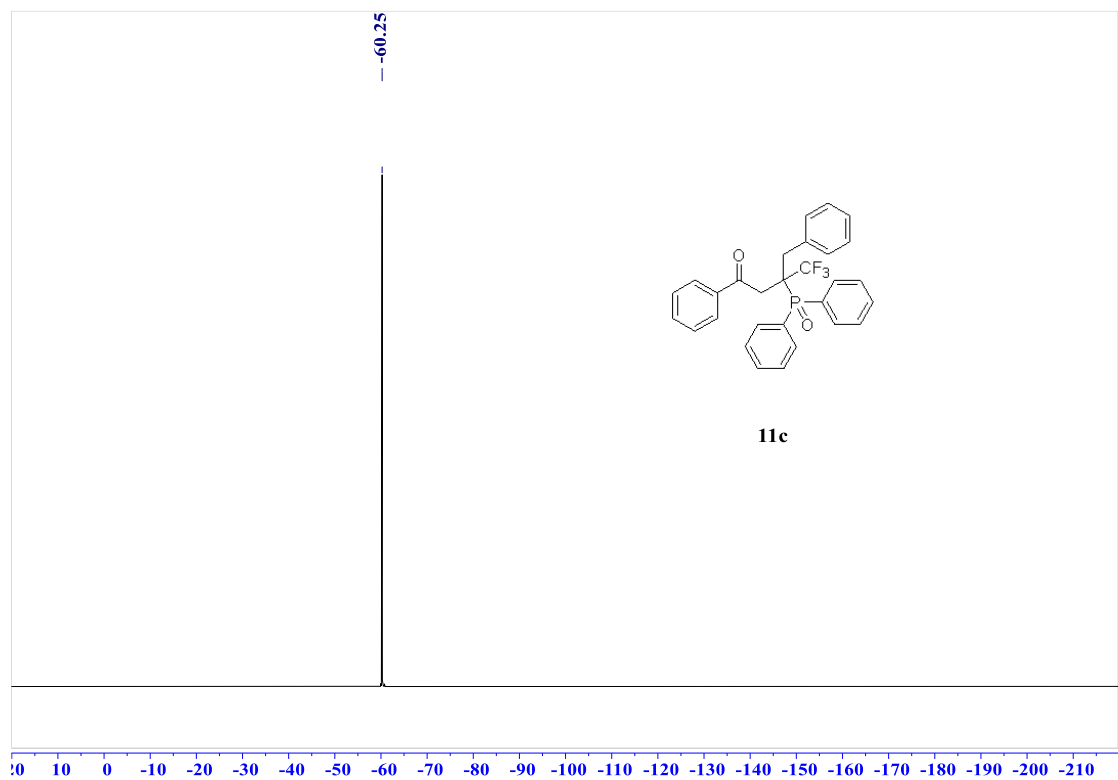

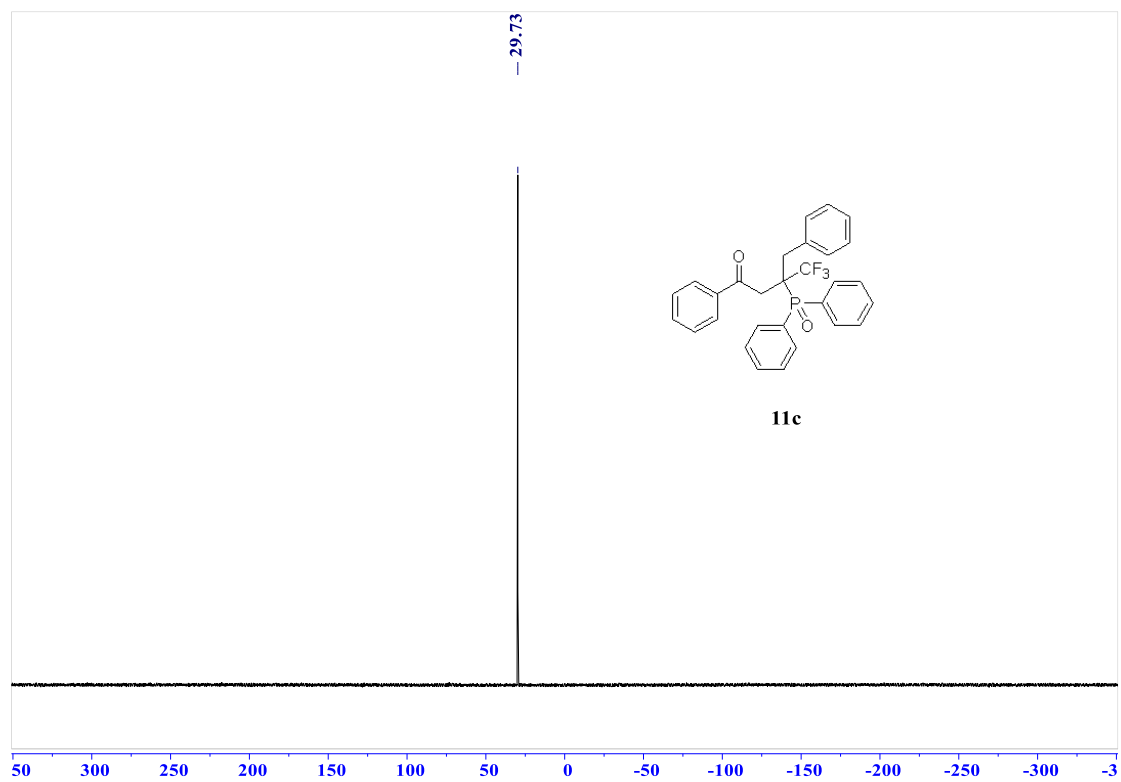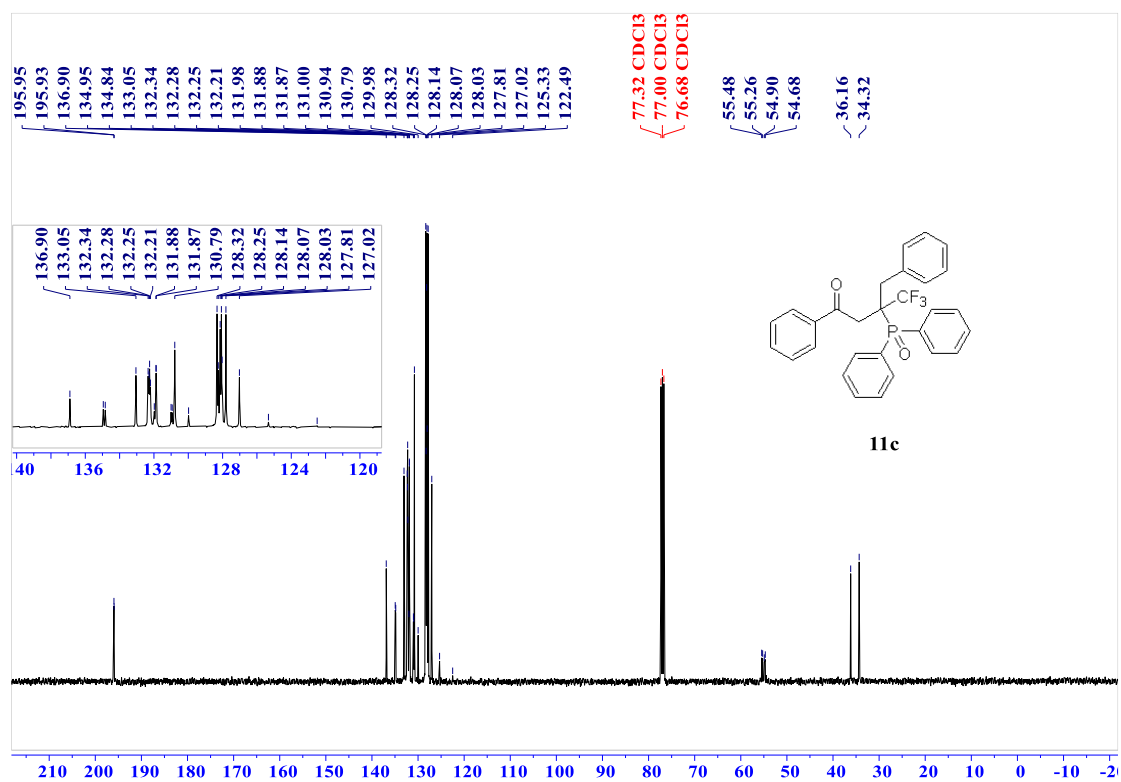

Supplement: d3gc01565c1.pdf [file d3gc01565c1.pdf]
